# Supplementary material for: Proteins with Complex Architecture as Potential Targets for Drug Design: A Case Study of Mycobacterium tuberculosis
Source: PLoS Comput Biol. 2011 Jul 21;7(7):e1002118. doi: 10.1371/journal.pcbi.1002118 (PMC3140968; doi:10.1371/journal.pcbi.1002118)
Supplement: Table S1 — Proteins of mycolic acid synthesis. List of proteins involved in the synthesis of mycolic acid. The corresponding functions are shown together with the name and position of the domains present. The last 5 columns show the number of occurrences of the respective domains in various groups of organisms. Bacterial specific domains are highlighted. (XLS) [file pcbi.1002118.s002.xls]

## Sheet: Sheet1
	Function	UniProt ID	Pfam domain name	Position of domain in the protein	No. of occurrences in MTB	No. of occurrences in Mycobacteria	No. of occurrences in Bacteria	No. of occurrences in Eukaryotes	No. of occurrences in human
	FAS-I	P95029	DUF1729	846-898	5	22	63	108	0
			Pfam-B_2395	910-1103	10	21	60	0	0
			Pfam-B_2395	1105-1186	10	21	60	0	0
			MaoC_dehydratas	1197-1321	40	230	2512	338	9
			Acyl_transf_1	1333-1549	100	396	4740	1229	3
			ketoacyl-synt	2571-2808	106	418	8868	1873	4
			Ketoacyl-synt_C	2816-2942	106	407	9050	1761	3
	FAS-I/FAS-II	P63458	Acyl_transf_1	4-295	100	396	4740	1229	3
		P0A4W6	PP-binding	10-77	171	774	13615	2893	17
		P0A574	ACP_syn_III	116-193	5	42	2403	94	0
			ACP_syn_III_C	242-332	4	38	2382	349	0
	FAS-II	P63454	ketoacyl-synt	11-254	106	418	8868	1873	4
			Ketoacyl-synt_C	262-374	106	407	9050	1761	3
		P63456	ketoacyl-synt	11-254	106	418	8868	1873	4
			Ketoacyl-synt_C	262-375	106	407	9050	1761	3
		P0A5Y4	adh_short	16-172	250	1811	30028	9766	157
		P64685	DUF2662	28-179	5	13	18	0	0
		O06542	ECH	24-192	119	695	8677	1585	58
		O06541	ECH	24-192	119	695	8677	1585	58
	Methyltransferases	P0C5C3	CMAS	2-282	56	181	1327	222	0
		Q79FX6	CMAS	3-283	56	181	1327	222	0
		P72027	CMAS	9-289	56	181	1327	222	0
		Q79FX8	CMAS	12-292	56	181	1327	222	0
		P0A5P0	CMAS	11-298	56	181	1327	222	0
		Q7D9R5	CMAS	3-283	56	181	1327	222	0
	Oxidation-reduction	O07406	FAD_binding_4	36-175	67	202	6148	1817	16
			FAD-oxidase_C	211-446	26	80	3341	393	14
		Q7DAC8	ADH_N	47-174	118	569	11321	4303	47
			ADH_zinc_N	216-339	123	607	11734	4960	63
		P95101	adh_short	13-182	250	1811	30028	9766	157
	Claisen-type condensation	O53578	Carboxyl_trans	36-520	32	151	2904	1665	26
		P96885	Carboxyl_trans	50-546	32	151	2904	1665	26
		O53580	AMP-binding	64-519	233	1265	20416	5890	124
		O53579	PP-binding	25-91	171	774	13615	2893	17
			ketoacyl-synt	116-366	106	418	8868	1873	4
			Ketoacyl-synt_C	374-492	106	407	9050	1761	3
			Acyl_transf_1	713-1039	100	396	4740	1229	3
			PP-binding	1236-1300	171	774	13615	2893	17
			Thioesterase	1469-1637	18	90	2212	337	7
	Mycolic_acid_processing	O53581	Cutinase	70-283	36	164	253	186	0
		Q10614	LysM	5-51	16	47	8179	1036	16
			LysM	56-102	16	47	8179	1036	16
			LysM	107-153	16	47	8179	1036	16
			Esterase	181-443	42	195	2601	173	1
		O33364	Esterase	81-298	42	195	2601	173	1
		P71829	Esterase	79-297	42	195	2601	173	1
		P65069	Hydrolase	23-227	94	405	18058	4484	164
		Q10850	Trehalose_PPase	285-512	9	34	434	523	0
			Glyco_hydro_65N	536-795	8	34	400	56	0
			Glyco_hydro_65m	847-1259	8	34	421	117	5
			Glyco_hydro_65C	1263-1317	8	31	357	38	0
		P0A4W4	ABC_membrane	17-288	31	126	12052	5402	179
			ABC_tran	376-502	224	1242	107341	11407	277
		P63397	ABC_membrane	53-353	31	126	12052	5402	179
			ABC_tran	437-562	224	1242	107341	11407	277
		P63391	FAD_binding_9	21-119	9	44	571	2	0
			SIP	128-241	9	44	579	2	0
			ABC_membrane	293-563	31	126	12052	5402	179
			ABC_tran	650-774	224	1242	107341	11407	277
		P63393	ABC_tran	373-498	224	1242	107341	11407	277
		O53645	ABC_membrane	20-289	31	126	12052	5402	179
			ABC_tran	374-499	224	1242	107341	11407	277
			Pfam-B_27575	554-612	6	10	10	0	0
			ABC_membrane	627-898	31	126	12052	5402	179
			ABC_tran	983-1108	224	1242	107341	11407	277
		Q50614	ABC_membrane_2	41-358	5	29	430	329	11
			ABC_tran	467-579	224	1242	107341	11407	277
		O65934	FHA	29-92	45	169	2162	1972	81
			Pfam-B_25573	102-211	5	10	10	0	0
			FHA	230-293	45	169	2162	1972	81
			ABC_tran	359-482	224	1242	107341	11407	277
			Pfam-B_30948	534-572	5	9	9	0	0
			ABC2_membrane	596-814	25	151	6136	2708	15
		O33189	ABC_tran	57-171	224	1242	107341	11407	277
		O33188	ABC2_membrane	1-190	25	151	6136	2708	15
		P0A4V2	Esterase	58-321	42	195	2601	173	1
		P0C5B9	Esterase	55-318	42	195	2601	173	1
		P0A4V4	Esterase	61-322	42	195	2601	173	1
