# Supplementary material for: Proteins with Complex Architecture as Potential Targets for Drug Design: A Case Study of Mycobacterium tuberculosis
Source: PLoS Comput Biol. 2011 Jul 21;7(7):e1002118. doi: 10.1371/journal.pcbi.1002118 (PMC3140968; doi:10.1371/journal.pcbi.1002118)
Supplement: Table S2 — MTB protein profiles. Profiles for each of the 3,948 MTB proteins obtained from the alignments performed on the CPSD (see Methods). (XLS) [file pcbi.1002118.s003.xls]

## Sheet: mtb_blast_results_new_cluster
	ANOGA	ARATH	BOVIN	CAEEL	CHICK	CRYHO	DANRE	DROME	DROPS	HUMAN	MONBE	MOUSE	NEMVE	OSTLU	OSTTA	PLAYO	RAT	THEAN	THEPA	YEAST	ACAM1	ACHLI	ACIAC	ACIBC	ACIBL	ACIC1	ACICJ	ACTP7	ACTSZ	AERHH	AERS4	AGRT5	AKKM8	ALCBS	ALHEH	ALKMQ	ALKOO	AMOA5	ANADE	ANADF	ANAMM	ANAPZ	ANASP	ANAVT	AQUAE	ARCB4	ARTAT	ARTS2	AYWBP
O05293	18	98	24	15	16	3	33	28	15	23	14	39	14	18	20	3	22	1	1	5	22	3	15	17	15	4	14	2	4	11	10	25	2	21	10	3	3	1	15	20	1	2	21	26	2	3	23	20	0
O05294	10	47	15	9	9	2	27	8	3	15	7	19	9	12	11	1	20	1	1	2	24	3	13	9	10	4	4	1	2	11	9	19	2	20	8	4	4	1	10	12	0	0	14	20	1	0	16	13	0
O05295	20	56	36	31	29	4	48	44	18	29	11	73	45	12	15	6	45	4	4	9	15	0	18	14	9	5	12	3	2	14	16	12	2	12	12	0	0	1	15	15	0	0	15	22	3	3	17	20	0
O05296	0	0	0	0	0	0	0	0	0	0	0	0	0	0	0	0	0	0	0	0	0	0	0	1	0	2	0	1	1	1	1	1	0	0	0	3	2	0	0	0	0	0	0	0	0	0	12	8	0
O05299	0	0	0	0	0	0	0	0	0	0	0	0	0	0	0	0	0	0	0	0	0	0	0	0	0	0	0	0	0	0	0	0	0	0	0	0	0	0	0	0	0	0	0	0	0	0	0	0	0
O05300	0	0	0	0	0	0	0	0	0	0	0	0	0	0	0	0	0	0	0	0	0	0	0	0	0	0	0	0	0	0	0	0	0	0	0	0	0	0	0	0	0	0	0	0	0	0	0	0	0
O05301	45	84	44	61	42	1	68	75	37	38	12	61	30	11	10	2	48	3	3	35	3	0	12	30	13	2	17	4	6	7	6	16	2	2	2	3	0	1	8	5	4	3	1	1	0	0	42	35	0
O05302	0	0	0	0	0	0	0	0	0	0	0	0	0	0	0	0	0	0	0	0	0	0	1	1	1	1	1	1	1	1	1	1	0	1	1	1	0	1	1	1	1	0	0	0	0	1	1	1	0
O05304	0	0	0	0	0	0	0	0	0	0	0	0	0	0	0	0	0	0	0	0	0	0	0	0	0	0	0	0	0	0	0	0	0	0	0	0	0	0	0	0	0	0	0	0	0	0	0	0	0
O05305	0	0	0	0	0	0	0	0	0	0	1	0	1	0	0	0	0	0	0	0	10	0	1	0	0	0	0	0	0	0	0	0	0	0	1	1	0	3	2	1	0	0	12	10	0	0	5	5	0
O05306	0	14	0	0	0	0	0	0	0	0	0	0	4	2	2	0	0	0	0	1	1	0	2	2	3	2	1	2	1	1	1	2	1	1	1	0	0	0	1	2	0	0	1	1	1	1	1	1	0
O05307	23	56	38	35	32	4	53	46	19	30	13	81	48	12	15	6	48	4	4	9	15	0	18	14	9	5	13	3	2	14	16	12	2	12	12	0	0	1	15	15	0	0	15	23	3	3	16	19	0
O05309	13	13	22	11	17	5	32	14	10	22	12	36	15	5	4	1	31	1	1	2	19	0	6	8	12	11	12	6	2	7	7	10	15	5	7	7	4	2	17	14	0	0	42	39	2	3	10	9	0
O05310	0	0	0	0	0	0	0	0	0	0	0	0	0	0	0	0	0	0	0	0	0	0	0	0	0	0	0	0	0	0	0	0	0	0	0	0	0	0	0	0	0	0	0	0	0	0	0	0	0
O05311	0	7	0	0	0	0	0	0	0	0	0	0	1	0	0	0	0	0	0	0	1	1	1	1	0	1	0	1	1	1	1	1	1	2	0	0	1	1	1	1	0	0	0	0	0	0	1	1	0
O05312	0	0	0	0	0	0	0	0	0	0	0	0	0	0	0	0	0	0	0	0	0	0	0	0	0	1	0	0	0	0	0	0	0	0	0	0	0	0	0	0	0	0	0	0	0	0	0	1	0
O05313	4	33	10	4	5	3	8	4	4	6	13	12	10	14	15	1	9	1	1	6	48	4	13	3	17	16	26	3	6	5	7	19	15	8	13	6	0	0	23	28	0	0	52	44	8	7	18	15	0
O05316	8	26	20	9	14	4	22	11	6	14	3	24	17	2	2	1	24	0	0	3	13	1	2	5	21	8	4	0	3	2	3	12	3	5	4	2	2	0	4	4	1	1	2	4	0	0	13	5	0
O05317	3	13	6	3	4	0	7	3	3	5	9	13	7	4	4	0	7	0	0	3	1	1	2	0	3	0	3	2	1	1	1	1	1	2	1	2	1	0	1	2	0	0	2	0	0	0	3	2	0
O05318	0	0	0	0	1	0	0	1	0	1	0	0	0	0	0	0	0	0	0	0	0	3	0	1	1	0	0	2	1	0	0	1	2	2	1	3	0	1	0	0	0	0	1	2	0	2	1	2	0
O05435	101	650	349	194	313	25	651	226	81	295	198	731	141	63	62	13	616	14	15	47	60	2	7	4	32	7	2	2	3	8	7	6	12	6	2	18	12	3	21	27	1	1	47	55	3	1	11	13	0
O05436	0	0	0	0	0	0	0	0	0	0	0	0	0	0	0	0	0	0	0	0	0	0	0	0	0	1	0	0	0	0	0	0	0	0	0	0	0	0	0	0	0	0	0	0	0	0	0	0	0
O05437	6	20	14	10	14	0	25	10	3	15	8	28	10	10	9	2	19	3	3	4	10	6	8	6	4	6	4	7	8	15	13	13	5	7	8	6	9	3	7	8	0	0	7	9	2	4	14	12	1
O05439	0	0	0	0	0	0	0	0	0	0	0	0	0	0	0	0	0	0	0	0	0	0	0	0	0	0	0	0	0	0	0	0	0	0	0	0	0	0	0	0	0	0	0	0	0	0	0	0	0
O05440	0	0	0	0	0	0	0	0	0	0	0	0	0	0	0	0	0	0	0	0	0	0	0	0	0	0	0	0	0	0	0	0	0	0	0	0	0	0	0	0	0	0	0	0	0	0	0	0	0
O05441	0	0	0	0	0	0	0	0	0	0	0	0	0	0	0	0	0	0	0	0	0	0	0	0	0	0	0	0	0	0	0	0	0	0	0	0	0	0	0	0	0	0	0	0	0	0	0	0	0
O05442	0	0	0	0	0	0	0	0	0	0	0	0	1	0	0	0	0	0	0	0	0	0	0	0	0	0	0	0	0	0	0	0	0	0	0	0	0	0	0	0	0	0	0	0	0	0	1	0	0
O05443	0	0	0	0	0	0	0	0	0	0	0	0	0	0	0	0	0	0	0	0	0	0	0	0	0	0	0	0	0	0	0	0	0	0	0	0	0	0	0	0	0	0	0	0	0	0	0	0	0
O05444	0	0	0	0	0	0	0	0	0	0	0	0	0	0	0	0	0	0	0	0	0	0	0	0	0	0	0	0	0	0	0	0	0	0	0	0	0	0	0	0	0	0	0	0	0	0	0	0	0
O05445	0	0	0	0	0	0	0	0	0	0	0	0	0	0	0	0	0	0	0	0	0	0	0	0	0	0	0	0	0	0	0	0	0	0	0	0	0	0	0	0	0	0	0	0	0	0	0	0	0
O05446	0	0	0	0	0	0	0	0	0	0	0	0	0	0	0	0	0	0	0	0	0	0	0	0	0	0	0	0	0	0	0	0	0	0	0	0	0	0	0	0	0	0	0	0	0	0	0	0	0
O05447	0	0	0	0	0	0	0	0	0	0	0	0	0	0	0	0	0	0	0	0	0	0	0	0	0	0	0	0	0	0	0	0	0	0	0	0	0	0	0	0	0	0	0	0	0	0	0	0	0
O05448	0	0	0	0	0	0	0	0	0	0	0	0	0	0	0	0	0	0	0	0	0	0	0	0	0	0	1	0	0	0	0	0	0	1	0	0	0	0	0	1	0	0	0	0	0	0	0	0	0
O05449	0	0	0	0	0	0	0	0	0	0	0	0	0	0	0	0	0	0	0	0	0	0	0	0	0	0	0	0	0	0	0	0	0	0	0	0	0	0	0	0	0	0	0	0	0	0	0	0	0
O05450	0	0	0	0	0	0	0	0	0	0	0	0	0	0	0	1	0	0	0	0	0	1	1	1	1	2	1	2	2	2	2	3	1	2	1	1	1	1	1	1	1	1	1	1	0	1	3	3	0
O05453	0	0	0	0	0	0	0	0	0	0	0	0	0	0	0	0	0	0	0	0	0	0	0	0	0	0	0	0	0	0	0	0	0	0	0	0	0	0	0	0	0	0	0	0	0	0	0	0	0
O05454	0	0	0	0	0	0	0	0	0	0	0	0	0	0	0	0	0	0	0	0	0	0	0	0	0	0	0	0	0	0	0	0	0	0	0	0	0	0	0	0	0	0	0	0	0	0	0	0	0
O05455	0	0	0	0	0	0	0	0	0	0	0	0	0	0	0	0	0	0	0	0	0	0	0	0	0	0	0	0	0	0	0	0	0	0	0	0	0	0	0	0	0	0	0	0	0	0	0	0	0
O05456	0	1	1	0	0	0	1	0	0	0	0	0	0	1	1	0	0	0	0	0	12	1	5	3	5	4	6	0	1	6	6	8	3	6	9	7	4	1	5	7	1	0	11	9	2	2	10	13	0
O05457	0	0	0	0	0	0	0	0	0	0	0	0	0	0	0	0	0	0	0	0	0	0	0	0	0	0	0	0	0	0	0	0	0	0	0	0	0	0	0	0	0	0	0	0	0	0	0	0	0
O05458	6	65	9	7	11	0	14	7	5	10	4	24	12	2	1	2	19	0	0	4	3	0	2	2	1	3	1	1	0	2	1	0	0	0	1	2	1	0	3	2	0	0	8	9	2	0	6	8	0
O05459	0	0	0	0	0	0	0	0	0	0	0	0	0	0	0	0	0	0	0	0	0	0	0	0	0	0	0	0	0	0	0	0	0	0	0	0	0	0	0	0	0	0	0	0	0	0	0	0	0
O05460	27	115	48	36	52	15	66	61	30	39	35	65	42	39	40	23	56	20	20	27	22	5	9	9	14	8	14	6	8	7	8	10	8	9	9	17	12	10	15	17	7	6	21	21	7	11	11	10	12
O05461	6	65	10	8	11	0	13	7	5	10	4	24	12	2	1	2	19	0	0	4	3	0	1	2	0	3	1	1	0	2	1	0	0	0	1	2	1	0	2	2	0	0	7	7	2	0	5	8	0
O05462	0	0	0	0	0	0	0	0	0	0	0	0	0	0	0	0	0	0	0	0	0	0	0	0	0	0	0	0	0	0	0	0	0	0	0	0	0	0	0	0	0	0	0	0	0	0	0	0	0
O05572	6	22	5	2	4	2	6	8	4	4	4	8	4	4	4	1	5	1	1	2	3	1	2	2	2	2	2	2	2	2	2	2	2	2	2	1	1	1	2	2	2	2	2	2	2	2	3	2	0
O05573	0	0	0	0	0	0	0	0	0	0	0	0	0	0	0	0	0	0	0	0	0	0	0	0	0	1	0	0	0	1	0	0	0	0	2	0	0	0	1	1	0	0	0	0	0	0	3	2	0
O05574	0	0	0	0	0	0	0	0	0	0	0	0	0	0	0	0	0	0	0	0	1	0	1	0	2	1	0	0	0	0	0	0	1	0	1	0	0	0	2	2	0	0	0	0	0	0	1	1	0
O05575	2	4	4	1	2	0	4	4	2	2	1	11	1	0	1	0	1	0	0	1	1	1	1	1	0	1	1	1	1	1	1	1	1	1	1	1	1	0	1	1	1	1	1	1	1	1	1	1	0
O05576	3	14	4	1	3	2	6	2	2	3	3	12	5	2	2	1	5	1	1	1	8	3	5	3	6	6	4	4	4	8	7	7	2	4	6	5	1	1	7	4	0	0	7	7	5	2	5	4	0
O05577	1	1	0	2	2	0	2	1	1	1	1	2	1	0	1	0	6	0	0	0	1	0	2	1	1	1	1	1	1	2	2	1	0	1	1	4	7	0	2	2	0	0	1	1	1	2	3	2	0
O05578	0	3	0	0	0	0	0	0	0	0	0	0	3	0	0	0	0	0	0	1	8	2	4	4	7	1	4	1	2	11	8	15	3	1	2	7	11	2	1	1	0	0	5	3	1	1	6	7	0
O05579	0	0	0	0	0	0	0	0	0	0	0	0	0	0	0	0	0	0	0	0	0	0	0	0	0	0	0	0	0	0	0	0	0	0	0	0	0	0	0	0	0	0	0	0	0	0	0	0	0
O05580	0	0	0	0	0	0	0	0	0	0	0	0	0	0	0	0	0	0	0	0	0	0	0	0	0	0	0	0	0	0	0	0	0	0	0	0	0	0	0	0	0	0	0	0	0	0	0	0	0
O05581	21	35	39	27	36	3	77	35	13	31	9	69	39	7	11	3	50	3	3	2	17	4	10	3	19	4	5	2	2	12	8	11	0	7	9	5	7	0	7	12	0	0	15	15	4	1	7	7	0
O05582	0	0	0	0	0	0	0	0	0	0	0	0	0	0	0	0	0	0	0	0	0	0	0	0	0	0	0	0	0	0	0	0	0	0	0	0	0	0	0	0	0	0	0	0	0	0	0	0	0
O05586	2	0	3	0	2	0	3	2	2	2	2	6	2	0	0	0	4	0	0	6	1	0	0	0	1	1	0	0	0	0	0	0	0	0	0	0	0	0	0	0	0	0	3	2	0	0	1	2	0
O05589	0	0	0	0	0	0	0	0	0	0	0	0	0	0	0	0	0	0	0	0	0	0	0	0	0	0	0	0	0	0	0	0	0	0	0	0	0	0	0	0	0	0	0	0	0	0	0	0	0
O05591	0	7	0	0	0	0	0	0	0	0	1	0	1	3	4	1	0	0	0	2	5	0	2	3	1	2	1	3	2	4	4	2	3	2	2	2	0	0	2	2	0	0	5	4	2	2	3	3	0
O05592	0	0	0	0	0	0	0	0	0	0	0	0	0	0	0	0	0	0	0	0	1	0	0	0	1	0	0	0	0	0	0	0	0	0	0	0	0	0	0	0	0	0	0	0	0	0	1	0	0
O05593	7	11	11	10	8	5	13	11	8	8	9	11	7	9	9	8	13	8	8	8	6	4	5	5	5	5	4	5	5	5	5	4	4	5	4	5	7	4	5	6	4	4	5	5	6	5	5	5	4
O05594	0	0	0	0	0	0	0	0	0	0	0	0	0	0	0	0	0	0	0	0	0	0	0	0	0	2	0	0	0	0	0	0	0	0	0	3	3	0	0	0	0	0	0	0	0	0	1	2	0
O05597	0	0	0	0	0	0	0	0	0	0	0	0	0	0	0	0	0	0	0	0	0	0	0	0	0	0	0	0	0	0	0	0	0	0	0	0	0	0	0	0	0	0	0	0	0	0	0	0	0
O05598	22	55	37	31	30	4	50	45	19	29	13	76	47	12	14	6	47	4	4	9	15	0	18	14	9	5	12	3	2	14	16	12	1	12	12	0	0	1	15	15	0	0	15	23	3	3	17	20	0
O05769	4	16	7	16	10	2	15	15	3	7	5	16	6	3	3	3	26	2	3	2	6	2	3	1	2	1	2	2	3	3	3	3	1	3	3	2	1	0	4	3	3	3	4	5	1	2	1	2	0
O05770	0	0	0	0	0	0	0	0	0	0	0	0	0	0	0	0	0	0	0	0	0	0	0	0	0	0	0	0	0	0	0	0	0	0	0	0	0	0	1	1	0	0	0	0	0	0	0	0	0
O05771	0	0	0	0	0	0	0	0	0	0	0	0	0	0	0	0	0	0	0	0	0	0	1	1	0	0	0	1	1	1	1	0	0	1	0	0	0	0	0	0	0	0	0	0	0	1	1	1	0
O05772	0	0	0	0	0	0	0	0	0	0	0	0	0	0	0	0	0	0	0	0	1	1	4	6	0	2	1	1	0	1	1	24	0	1	0	0	0	0	0	0	0	0	2	7	0	0	14	12	0
O05773	7	4	16	16	11	0	26	9	6	12	9	21	15	2	2	0	14	0	0	0	4	1	18	20	5	4	11	0	0	4	3	14	0	17	2	1	3	0	8	9	0	0	1	1	0	0	8	8	0
O05775	1	9	1	1	1	0	1	4	1	1	1	2	2	3	3	0	3	0	0	0	0	0	0	0	1	1	0	0	0	0	0	0	1	0	0	0	0	0	0	2	0	0	1	0	0	0	0	0	0
O05776	0	0	0	0	0	0	0	0	0	0	0	0	0	0	0	0	0	0	0	0	0	0	0	0	0	0	0	0	0	0	0	0	0	0	0	0	0	0	0	0	0	0	0	0	0	0	0	0	0
O05777	0	0	0	0	0	0	0	0	0	0	0	0	0	0	0	0	0	0	0	0	0	0	0	0	0	1	0	0	0	0	0	0	0	0	0	0	0	0	0	0	0	0	0	0	0	0	1	1	0
O05779	0	2	0	0	0	0	0	0	0	0	0	0	4	1	0	0	0	0	0	0	20	15	26	18	16	13	19	19	17	31	26	112	13	10	15	49	32	5	14	13	4	2	29	27	7	9	33	31	8
O05780	0	0	0	0	0	0	0	0	0	0	0	0	0	0	0	0	0	0	0	0	0	0	0	0	0	0	0	0	0	0	0	0	0	0	0	0	0	0	0	0	0	0	0	0	0	0	0	0	0
O05781	0	8	0	0	0	1	0	0	0	0	1	0	0	3	1	0	0	0	0	0	9	1	5	2	3	1	3	3	2	5	5	5	2	6	3	1	0	2	2	1	0	0	7	6	2	2	1	2	0
O05783	3	12	5	3	3	1	4	8	3	2	5	2	6	3	2	2	3	1	1	4	1	4	3	3	3	4	3	0	1	6	4	4	1	3	5	4	4	1	5	6	2	1	2	1	1	2	6	5	0
O05784	3	18	8	7	6	0	8	3	3	4	4	11	7	5	4	0	8	0	0	4	3	1	7	1	2	1	4	2	2	2	1	5	1	2	4	5	0	0	7	7	0	0	5	5	1	2	3	5	0
O05785	0	0	0	0	0	0	0	0	0	0	0	0	0	0	0	0	0	0	0	0	0	0	0	0	0	0	0	0	0	0	0	0	0	0	0	0	0	0	0	0	0	0	0	0	0	0	0	0	0
O05786	1	1	2	2	4	0	2	3	1	3	1	4	2	2	1	0	3	0	0	0	7	0	1	2	10	3	7	2	3	1	1	1	4	2	2	8	5	0	4	12	0	0	6	5	6	4	1	2	0
O05790	3	22	6	8	5	0	7	8	6	5	2	6	10	14	15	0	7	0	0	8	15	3	8	9	10	3	5	4	8	14	13	8	7	8	8	4	3	0	5	8	1	1	11	14	1	6	10	12	0
O05791	2	11	2	5	2	1	6	3	1	3	2	4	5	4	5	2	4	2	2	5	3	3	4	3	2	2	2	2	2	3	3	2	3	2	2	3	2	2	3	3	2	2	4	4	2	2	5	5	1
O05793	3	9	6	6	6	0	5	3	1	4	3	8	6	1	3	1	4	0	0	3	5	0	3	1	3	2	7	1	1	5	4	2	1	3	8	3	1	1	5	2	0	0	6	5	3	1	5	5	0
O05795	1	1	1	1	1	0	0	1	1	1	1	3	2	1	2	0	2	0	0	0	1	0	1	1	1	1	1	1	1	1	1	1	0	1	1	0	0	0	1	1	0	0	1	1	1	1	1	1	0
O05796	15	69	33	20	22	4	42	17	14	26	28	60	46	37	38	4	45	4	5	7	55	1	14	11	21	3	15	12	11	19	16	20	6	18	21	14	10	2	29	27	7	4	32	34	9	4	12	18	0
O05797	0	0	0	0	0	0	0	0	0	0	0	0	0	0	0	0	0	0	0	0	9	0	2	3	9	7	2	1	0	4	3	6	1	1	1	16	9	0	3	4	0	0	9	10	0	2	6	8	0
O05799	0	0	0	0	0	0	0	0	0	0	0	0	0	0	0	0	0	0	0	0	0	0	0	0	0	0	0	0	0	0	0	0	0	0	0	0	0	0	0	0	0	0	0	0	0	0	0	0	0
O05800	0	0	0	0	0	0	0	0	0	0	0	0	0	0	0	0	0	0	0	0	0	0	0	0	0	0	0	0	0	0	0	0	0	0	0	0	0	0	1	2	0	0	0	0	0	0	0	0	0
O05804	0	0	0	0	0	0	0	0	0	0	0	0	0	0	0	0	0	0	0	0	0	0	0	0	0	1	1	0	0	0	0	0	0	0	0	0	0	0	0	0	0	0	0	0	0	0	1	1	0
O05805	18	92	20	19	17	4	25	24	10	20	12	40	14	17	19	11	21	4	6	5	29	2	13	16	14	4	13	1	5	12	13	26	0	22	11	4	4	0	10	18	0	0	21	25	0	0	22	15	0
O05809	7	21	47	6	39	2	80	7	5	35	16	68	25	9	9	6	73	4	4	2	16	1	6	1	14	4	9	1	1	10	9	4	7	5	12	4	6	1	20	17	1	1	12	16	3	2	10	8	0
O05813	12	18	8	11	2	0	6	19	7	6	7	8	6	7	7	1	7	0	0	27	1	0	20	27	10	9	16	4	6	14	11	18	3	4	3	0	0	0	9	7	1	1	0	1	1	4	41	34	0
O05814	3	9	9	7	7	2	7	8	3	6	4	13	2	4	4	3	14	4	3	5	5	4	2	3	3	2	3	3	3	3	3	3	4	4	3	4	4	3	4	4	2	2	4	4	4	3	2	2	3
O05815	0	0	0	0	0	0	0	0	0	0	0	0	0	0	0	0	0	0	0	0	0	0	0	0	0	0	0	0	0	0	0	0	0	0	0	0	0	0	0	0	0	0	0	0	0	0	1	0	0
O05816	0	0	0	0	0	0	0	0	0	0	0	0	0	0	0	0	0	0	0	0	0	0	0	0	0	0	0	0	0	0	0	0	0	0	0	0	0	0	0	0	0	0	0	0	0	0	0	0	0
O05819	22	51	33	32	30	2	47	42	19	27	14	69	41	13	15	2	44	2	1	8	16	0	19	15	9	6	12	3	2	15	18	14	1	13	12	0	0	1	14	13	0	0	18	27	3	2	16	19	0
O05820	1	24	5	2	6	0	5	2	0	4	3	6	3	1	1	0	8	0	0	0	4	0	3	4	1	2	1	0	0	1	4	2	0	6	1	0	0	1	2	1	1	0	2	2	0	1	4	5	0
O05821	0	0	0	0	0	0	0	0	0	0	0	0	0	0	0	0	0	0	0	0	0	0	2	0	0	0	0	0	0	0	0	1	0	1	0	0	0	0	0	0	0	0	0	0	0	0	0	1	0
O05823	0	0	0	0	0	0	0	0	0	0	0	0	0	0	0	0	0	0	0	0	0	0	0	0	0	1	0	0	0	0	0	0	0	0	0	0	0	0	0	0	0	0	0	0	0	0	1	1	0
O05828	0	0	0	0	0	0	0	0	0	0	0	0	0	0	0	0	0	0	0	0	0	0	0	0	0	2	0	1	1	1	1	1	0	0	0	2	1	0	0	0	0	0	0	0	0	0	8	5	0
O05829	0	0	0	0	0	0	0	0	0	0	0	0	0	0	0	0	0	0	0	0	0	0	0	0	0	0	0	0	0	0	0	0	0	0	0	0	0	0	0	0	0	0	0	0	0	0	0	0	0
O05833	0	0	0	0	0	0	0	0	0	0	0	0	0	0	0	0	0	0	0	0	0	0	0	0	0	0	0	0	0	0	0	0	0	0	0	0	0	0	0	0	0	0	0	0	0	0	0	0	0
O05838	0	0	0	0	0	0	0	0	0	0	0	0	0	0	0	0	0	0	0	0	0	0	0	0	0	0	0	0	0	0	0	0	0	0	0	0	0	0	0	0	0	0	0	0	0	0	0	0	0
O05839	0	0	0	0	0	0	0	0	0	0	0	0	0	0	0	0	0	0	0	0	15	2	2	3	2	3	2	1	1	2	2	3	1	2	4	3	3	0	2	2	0	0	3	3	2	4	2	2	0
O05840	0	0	0	0	0	0	0	0	0	0	0	0	0	0	0	0	0	0	0	0	10	2	2	3	7	0	5	3	1	4	4	13	1	4	5	8	9	1	6	10	0	0	9	8	1	2	19	16	0
O05841	1	6	4	2	5	0	3	1	2	3	1	4	8	2	2	0	3	0	0	1	14	2	6	6	8	2	6	3	2	12	9	18	3	3	4	8	12	2	1	3	0	0	8	9	1	2	13	13	0
O05842	37	83	61	44	39	2	87	55	31	41	25	74	57	6	8	1	60	0	0	7	29	4	29	33	24	7	37	4	10	16	16	63	7	24	10	3	5	1	21	22	3	4	21	26	3	3	36	34	0
O05844	0	0	0	0	0	0	0	0	0	0	0	0	0	0	0	0	0	0	0	0	0	0	0	0	0	0	0	0	0	0	0	0	0	0	0	0	0	0	0	0	0	0	0	0	0	0	0	0	0
O05846	0	8	0	0	0	1	0	0	0	0	1	0	1	1	2	0	0	0	0	0	76	1	42	13	57	8	14	3	1	34	27	43	4	24	21	40	21	3	66	87	3	3	98	97	4	16	13	13	0
O05847	0	0	0	0	0	0	0	0	0	0	0	0	0	0	0	0	0	0	0	0	0	0	0	0	0	4	0	0	0	0	0	0	0	0	0	0	0	0	0	0	0	0	0	0	0	0	3	2	0
O05848	0	2	0	0	0	0	0	0	0	0	1	0	1	1	0	0	0	0	0	0	2	1	1	0	2	1	0	0	0	0	0	1	1	2	0	2	2	0	2	2	0	0	2	2	0	0	4	4	0
O05849	0	0	0	0	0	0	0	0	0	0	0	0	0	0	0	0	0	0	0	0	0	0	0	0	0	0	0	0	0	0	0	0	0	0	0	0	0	0	0	0	0	0	0	0	0	0	0	0	0
O05850	1	2	3	1	2	0	7	2	1	3	0	6	3	0	0	0	3	0	0	2	3	0	1	2	1	0	1	0	0	0	0	2	0	1	0	0	1	0	0	1	0	0	1	1	0	0	1	1	0
O05851	0	7	0	0	0	0	0	0	0	0	1	0	1	3	4	1	0	0	0	2	5	0	2	3	1	2	1	3	2	4	4	2	3	2	2	2	0	0	2	2	0	0	5	4	2	2	3	3	0
O05853	2	5	3	1	2	1	3	2	1	2	5	3	2	5	5	2	2	2	2	2	23	2	10	8	6	5	12	2	2	9	12	11	4	7	10	8	8	2	9	10	2	1	25	27	7	3	10	13	0
O05854	0	0	0	0	0	0	0	0	0	0	0	0	0	0	0	0	0	0	0	0	0	0	0	0	0	0	0	0	0	0	0	0	0	0	0	0	0	0	0	0	0	0	0	0	0	0	0	0	0
O05855	35	75	56	51	56	25	78	52	27	44	31	87	49	45	43	36	72	29	29	27	5	3	8	3	4	4	5	5	5	12	12	4	6	8	5	6	4	4	8	10	1	1	6	6	2	5	6	6	2
O05856	0	0	0	0	0	0	0	0	0	0	0	0	0	0	0	0	0	0	0	0	0	0	0	0	0	1	0	0	0	0	0	0	0	0	0	0	0	0	0	0	0	0	0	0	0	0	1	1	0
O05857	0	0	0	0	0	0	0	0	0	0	0	0	0	0	0	0	0	0	0	0	0	0	0	0	0	0	0	0	0	0	0	0	0	0	0	0	0	0	0	0	0	0	0	0	0	0	0	0	0
O05858	0	0	0	0	0	0	0	0	0	0	0	0	1	0	0	0	0	0	0	0	30	2	13	45	14	6	6	5	4	17	16	29	2	21	7	17	7	0	12	13	0	0	12	11	5	3	23	29	0
O05859	0	0	0	0	0	0	0	0	0	0	0	0	0	0	0	0	0	0	0	0	0	0	0	0	0	0	0	0	0	0	0	0	0	0	0	0	0	0	0	0	0	0	0	0	0	0	0	0	0
O05861	0	0	0	0	0	0	0	0	0	0	0	0	0	0	0	0	0	0	0	0	0	0	0	0	0	0	0	0	0	0	0	0	0	0	0	0	0	0	0	0	0	0	0	0	0	0	0	0	0
O05862	0	0	1	2	1	0	1	1	1	1	1	1	6	0	0	0	1	0	0	1	3	1	1	3	3	1	2	1	1	4	3	3	2	2	1	1	2	2	3	2	0	0	1	2	1	2	3	2	0
O05863	10	39	13	8	10	2	17	14	7	10	6	16	11	13	8	1	12	1	0	2	18	2	12	10	9	4	9	1	4	8	7	20	1	13	4	3	3	0	12	14	1	1	19	24	1	2	18	17	0
O05866	2	3	2	1	3	0	8	4	1	2	2	2	2	2	1	0	3	0	0	2	0	0	1	0	1	0	0	0	0	0	0	3	0	0	0	0	0	0	1	2	0	0	0	0	0	0	1	1	0
O05870	0	0	0	0	0	0	0	0	0	1	0	0	1	2	3	0	0	0	0	0	7	1	1	1	1	1	1	1	0	1	1	1	1	1	1	2	3	0	1	1	1	1	5	6	1	1	1	1	0
O05871	158	1043	511	337	521	48	1257	380	143	424	297	1072	252	86	88	38	875	31	32	100	60	0	5	1	35	5	1	0	1	0	0	1	6	1	0	1	1	4	20	21	0	0	49	57	1	0	7	11	0
O05872	1	2	1	0	2	0	1	1	1	1	1	1	1	1	1	0	2	0	0	1	1	1	0	2	1	1	3	0	0	0	0	2	0	0	1	0	1	0	1	0	0	0	1	1	0	0	2	2	0
O05873	0	3	0	0	2	0	0	0	0	0	0	0	1	1	1	0	0	0	1	0	2	2	2	2	0	1	0	2	2	2	3	0	1	2	3	1	2	3	2	1	0	0	2	1	2	0	3	3	1
O05875	6	24	17	7	13	0	14	8	4	16	5	35	11	12	11	2	26	3	4	7	13	1	5	11	4	5	8	3	5	10	10	5	1	6	5	3	1	0	4	5	0	1	7	9	1	0	9	7	0
O05876	0	0	0	0	0	0	0	0	0	0	0	0	0	0	0	0	0	0	0	0	0	0	0	0	0	0	0	0	0	0	0	0	0	0	0	0	0	0	0	0	0	0	0	0	0	0	0	0	0
O05877	0	0	0	0	0	0	0	0	0	0	0	0	1	0	1	0	0	0	0	0	1	0	1	1	2	0	1	0	0	1	1	1	2	0	1	0	0	0	0	1	0	0	2	1	0	3	2	1	0
O05878	2	12	0	0	0	1	0	0	0	0	0	0	4	1	1	0	0	0	0	0	0	0	0	1	1	1	0	0	0	1	1	0	0	2	0	0	0	0	1	1	0	0	0	0	0	0	0	0	0
O05879	0	11	0	0	0	0	0	1	1	0	1	0	3	1	1	0	0	0	0	0	0	0	0	1	1	1	0	0	0	1	2	0	0	2	0	0	0	0	1	1	0	0	0	0	0	0	0	0	0
O05880	0	0	0	0	0	0	0	0	0	0	0	0	0	0	0	0	0	0	0	0	0	0	0	0	0	0	0	0	0	0	0	0	0	0	0	0	0	0	0	0	0	0	0	0	0	0	0	0	0
O05882	0	0	0	0	0	0	0	0	0	0	1	0	0	2	2	0	0	0	0	0	6	1	0	1	2	0	0	1	0	5	5	1	3	2	1	4	2	1	1	0	0	0	3	3	3	1	2	2	0
O05883	3	7	3	2	3	0	6	3	3	3	2	3	4	1	1	0	3	0	0	1	2	0	2	0	3	0	2	1	1	1	1	1	1	2	0	2	1	0	1	2	0	0	2	1	0	0	3	0	0
O05884	5	3	6	11	8	1	14	15	4	3	3	16	4	7	1	0	7	0	0	14	2	0	16	22	13	10	10	2	4	15	12	17	1	3	1	0	0	0	8	11	1	1	2	3	2	2	29	26	0
O05886	0	1	0	0	0	0	0	0	0	0	0	0	0	1	1	1	0	0	0	0	1	1	1	1	1	1	2	1	1	2	2	1	1	1	2	1	1	0	3	2	1	0	1	2	1	1	1	1	0
O05887	0	0	0	0	0	0	0	0	0	0	0	0	0	0	0	0	0	0	0	0	1	0	1	1	1	1	1	1	1	1	1	1	1	1	1	1	1	1	1	1	1	1	1	1	1	0	1	1	0
O05888	0	0	0	0	0	0	0	0	0	0	0	0	0	0	0	0	0	0	0	0	0	0	0	0	0	0	0	0	0	0	0	0	0	0	0	0	0	0	0	0	0	0	0	0	0	0	0	0	0
O05889	0	0	0	0	0	0	0	0	0	0	0	0	0	0	0	0	0	0	0	0	0	0	0	0	0	1	0	0	0	0	0	0	0	0	0	0	0	0	0	0	0	0	0	0	0	0	1	1	0
O05891	3	7	7	2	10	1	15	6	3	7	3	14	6	2	2	1	9	1	1	1	1	2	1	1	4	1	1	1	1	1	1	3	1	2	1	3	1	0	3	3	1	1	1	1	2	1	2	2	5
O05892	0	0	0	0	0	0	0	0	0	0	0	0	1	0	0	0	0	0	0	0	30	2	12	43	13	4	5	5	4	16	16	28	2	20	6	16	7	0	10	11	0	0	11	11	5	0	23	25	0
O05893	0	2	0	0	0	0	0	0	0	0	0	0	0	3	4	1	0	0	0	0	1	0	1	2	0	0	1	0	0	1	1	0	0	2	3	1	1	0	0	0	0	0	3	3	0	0	0	0	0
O05894	0	2	0	0	0	0	0	0	0	0	0	0	0	1	2	1	0	0	0	0	1	0	1	2	0	0	1	0	0	1	1	0	0	2	3	1	1	0	0	0	0	0	3	3	0	0	0	0	0
O05895	0	0	0	0	0	0	0	0	0	0	0	0	0	0	0	0	0	0	0	0	0	0	0	1	0	0	1	0	0	0	0	0	0	2	0	0	0	0	0	0	0	0	0	0	0	0	0	0	0
O05896	18	20	46	26	24	0	59	27	13	25	3	55	22	1	1	0	49	0	0	24	2	0	2	21	17	4	4	2	1	7	7	2	2	1	0	1	2	0	0	3	0	0	1	1	0	0	32	23	0
O05897	3	25	4	4	3	0	6	8	3	5	3	11	6	10	11	0	8	0	0	4	16	0	8	8	8	1	4	3	0	5	3	7	0	5	4	1	1	0	2	3	1	1	5	7	2	0	9	10	0
O05898	1	2	2	2	1	1	1	1	1	1	1	1	1	1	1	1	1	1	1	1	0	0	0	0	1	1	0	1	1	1	1	0	1	0	0	0	0	0	0	0	0	0	0	0	0	0	1	1	0
O05899	0	0	0	0	0	0	0	0	0	0	0	0	0	0	0	0	0	0	0	0	0	0	0	0	0	1	0	0	0	0	0	0	0	0	0	0	0	0	0	0	0	0	0	0	0	0	0	0	0
O05900	0	1	4	11	1	1	2	0	0	2	1	3	6	1	1	0	1	1	1	0	1	2	0	3	13	1	1	0	0	1	1	6	0	1	0	2	1	1	3	2	0	0	2	1	0	0	6	4	0
O05901	0	0	0	0	0	0	0	0	0	0	0	0	0	0	0	0	0	0	0	0	0	0	0	0	0	0	0	0	0	0	0	0	0	0	0	0	0	0	0	0	0	0	0	0	0	0	1	1	0
O05902	0	0	0	0	0	0	0	0	0	0	0	0	0	0	0	0	0	0	0	0	0	0	0	0	0	0	0	0	0	0	0	0	0	0	0	0	0	0	1	0	0	0	0	0	0	0	2	5	0
O05903	0	8	0	0	1	0	2	0	0	0	1	0	0	2	1	0	0	0	0	1	16	0	3	2	19	0	4	1	1	8	6	8	0	3	2	3	2	0	9	10	0	0	4	2	0	0	13	17	0
O05904	0	0	0	0	0	0	0	0	0	0	0	0	0	0	0	0	0	0	0	0	0	0	0	0	0	0	0	0	0	0	0	0	0	0	0	0	0	0	0	0	0	0	0	0	0	0	0	0	0
O05905	1	9	3	4	6	0	13	2	1	3	0	3	5	6	6	0	5	0	0	0	6	0	0	0	0	0	0	0	0	0	0	0	0	0	0	0	0	0	0	0	0	0	3	4	0	0	0	0	0
O05906	5	6	7	6	7	0	10	10	6	6	5	17	10	1	1	1	19	0	0	2	1	1	6	9	3	3	6	1	0	3	3	6	0	7	4	1	3	0	4	4	0	0	0	0	0	0	9	8	0
O05910	0	0	0	0	0	0	0	0	0	0	0	0	0	0	0	0	0	0	0	0	1	0	1	0	0	0	2	1	0	0	0	0	0	0	0	0	0	0	0	0	0	0	0	0	0	0	0	0	0
O05911	4	2	3	2	3	0	4	5	5	3	2	5	4	2	1	0	4	0	0	3	8	1	3	2	1	2	2	1	1	8	5	4	3	1	1	4	3	0	0	1	0	0	7	6	2	1	4	5	0
O05912	0	58	1	0	0	0	0	0	0	0	0	0	0	0	0	1	0	0	0	0	3	0	0	0	0	0	14	0	0	0	2	0	0	0	0	1	1	0	0	1	0	0	0	0	0	0	0	1	0
O05913	0	0	0	0	0	0	0	0	0	0	0	0	0	0	0	0	0	0	0	0	2	2	5	3	4	0	8	0	0	0	3	3	0	0	0	6	2	2	4	1	0	0	2	1	0	0	6	7	0
O05914	0	0	0	0	0	0	0	0	0	0	0	0	0	0	0	0	0	0	0	0	3	0	0	0	0	0	4	0	0	0	0	0	0	0	0	3	0	0	0	0	0	0	23	13	3	0	0	0	0
O05915	4	7	4	1	3	0	6	4	4	3	2	4	3	1	2	0	3	0	0	0	2	0	0	0	0	0	0	0	0	0	0	1	0	1	2	0	0	0	1	0	0	0	1	1	0	0	0	0	0
O05916	0	7	7	3	6	0	1	2	1	2	2	4	1	1	1	1	5	0	0	3	0	0	0	1	3	1	4	1	1	1	1	2	0	0	0	1	0	0	0	0	0	0	1	0	0	1	2	0	0
O05917	0	5	1	0	1	0	2	0	0	1	0	2	0	1	1	0	0	0	0	2	5	0	2	4	3	0	3	1	0	0	1	3	0	3	2	4	2	1	0	2	0	0	1	2	0	1	1	1	0
O05918	0	1	0	0	0	0	0	0	0	0	0	0	1	0	0	0	0	0	0	0	1	1	1	1	3	3	1	1	2	1	1	2	1	1	2	1	1	0	2	2	1	0	2	2	1	0	4	3	0
O05919	34	83	57	45	40	1	79	54	31	38	26	64	52	6	7	1	56	0	0	8	28	4	29	32	25	7	39	4	10	16	16	61	7	22	10	3	5	1	21	20	3	4	20	25	3	3	35	33	0
O06128	0	0	0	0	0	0	0	0	0	0	0	0	0	0	0	0	0	0	0	0	0	0	0	0	0	0	0	0	0	0	0	0	0	0	0	0	0	0	0	0	0	0	0	0	0	0	0	0	0
O06131	0	0	0	0	0	0	0	0	0	0	0	0	0	0	0	0	0	0	0	0	1	1	1	1	2	1	1	1	1	1	1	1	1	2	1	2	2	1	2	2	1	1	1	1	1	1	2	4	0
O06132	3	0	3	3	4	0	3	3	3	3	1	6	3	0	0	0	4	0	0	0	1	0	0	0	0	0	0	0	0	0	0	0	0	0	0	0	0	0	0	0	0	0	1	1	0	0	1	0	0
O06133	0	0	0	0	0	0	0	0	0	0	0	0	0	0	0	0	0	0	0	0	0	0	0	0	1	0	0	0	0	0	0	0	0	0	0	0	0	0	1	0	0	0	0	0	0	0	0	0	0
O06134	1	15	3	5	2	1	6	9	4	2	1	5	1	2	2	2	20	2	2	2	3	1	1	0	2	1	1	1	1	3	3	1	1	1	1	1	1	2	1	1	0	0	2	2	0	2	1	1	1
O06135	0	5	1	9	2	0	1	0	0	1	0	2	1	0	0	0	2	0	0	1	0	0	1	2	0	0	0	0	1	1	1	1	0	2	0	0	0	0	0	0	0	0	0	0	0	0	2	1	0
O06136	0	0	0	0	0	0	0	0	0	0	0	0	0	0	0	0	0	0	0	0	0	0	0	0	0	1	0	0	0	1	0	1	0	0	0	0	0	0	1	1	0	0	0	1	0	0	2	2	0
O06137	20	45	72	39	31	5	40	50	14	24	18	50	51	8	8	5	65	3	3	10	22	15	22	11	9	13	29	16	15	29	27	83	11	6	22	21	23	10	15	17	5	3	37	31	3	8	33	34	4
O06138	19	45	69	38	29	5	40	50	14	23	17	46	46	7	8	3	63	3	3	10	28	16	24	12	9	13	25	13	15	28	27	89	10	5	21	18	26	10	16	17	5	3	38	34	2	8	32	36	4
O06139	0	0	0	0	0	0	0	0	0	0	0	0	0	0	0	0	0	0	0	0	1	0	0	2	1	1	2	1	1	2	2	1	1	1	1	0	0	0	2	2	0	0	1	4	1	1	1	1	0
O06141	0	0	0	0	0	0	0	0	0	0	0	0	0	0	0	0	0	0	0	0	1	0	0	1	1	0	0	0	0	0	0	0	1	1	0	0	0	0	0	1	0	0	1	3	0	0	1	0	0
O06143	0	5	0	0	0	0	0	0	0	0	1	0	4	2	2	0	0	0	0	1	86	0	34	17	48	22	14	5	5	42	36	27	3	29	20	50	30	3	44	60	2	2	89	80	2	25	17	24	0
O06144	7	7	7	7	8	0	12	10	7	6	5	17	11	2	2	1	19	0	0	2	4	3	8	10	4	2	6	2	0	5	5	7	1	8	4	3	5	1	6	6	1	1	2	2	1	1	9	9	0
O06145	0	0	0	0	0	0	0	0	0	0	0	0	0	0	0	0	0	0	0	0	0	0	0	0	0	0	0	0	0	0	0	0	0	0	0	0	0	0	0	0	0	0	0	0	0	0	0	0	0
O06147	5	14	12	4	7	1	9	11	5	6	3	10	9	8	10	3	11	3	4	3	5	5	3	5	3	2	2	4	4	4	4	3	3	4	4	8	6	2	4	4	2	2	5	5	4	3	3	3	1
O06149	0	0	0	0	0	0	0	0	0	0	0	0	0	0	0	0	0	0	0	0	0	0	0	0	0	0	0	0	0	0	0	0	0	0	0	0	0	0	0	0	0	0	0	0	0	0	0	0	0
O06151	26	66	16	23	27	0	41	38	16	20	12	38	22	15	10	1	28	0	0	28	1	0	19	26	12	9	19	5	6	16	14	17	3	3	3	2	0	0	10	8	1	1	1	3	2	6	35	38	0
O06152	0	0	0	0	0	0	0	0	0	0	0	0	0	0	0	0	0	0	0	0	1	0	0	0	1	0	1	0	0	0	0	0	1	0	0	0	0	0	0	1	0	0	6	5	0	0	0	0	0
O06153	0	29	0	0	0	0	0	0	0	0	3	0	19	3	4	0	0	0	0	0	12	0	4	4	2	2	0	1	3	3	3	2	1	4	9	1	0	0	9	12	0	0	12	11	2	1	7	14	0
O06154	3	11	7	4	8	0	7	7	3	6	5	13	10	4	4	2	9	1	1	2	3	2	5	4	3	4	7	2	2	2	2	4	1	5	4	3	1	1	5	4	0	0	2	2	1	1	6	5	0
O06155	0	0	0	0	0	0	0	0	0	0	0	0	0	0	0	0	0	0	0	0	3	0	5	4	2	1	2	2	2	3	3	5	3	1	2	5	4	0	0	0	1	1	2	2	0	1	1	1	0
O06156	0	0	0	0	0	0	0	0	0	0	0	0	0	1	1	0	0	0	0	0	0	1	1	0	0	0	0	0	0	1	1	1	0	1	1	0	0	0	0	1	0	0	0	0	0	0	0	0	0
O06157	14	103	26	11	20	4	49	35	12	23	14	45	17	19	20	4	43	1	1	6	28	3	20	17	20	4	13	2	5	12	12	26	2	20	12	3	3	1	17	20	2	3	22	28	2	3	27	23	0
O06159	3	13	9	5	13	0	11	7	3	6	8	10	7	6	6	3	9	2	3	5	2	2	6	6	4	5	6	3	4	4	2	5	4	5	5	4	3	3	7	7	2	2	2	2	3	2	9	11	1
O06160	3	14	10	3	6	0	7	12	2	6	3	9	5	4	3	3	6	2	2	1	3	1	2	4	2	4	4	2	4	3	3	5	3	2	3	3	2	2	2	4	2	2	4	4	2	1	8	8	1
O06161	10	12	13	6	5	0	12	16	6	9	4	13	8	5	5	3	16	1	1	2	1	1	2	5	3	4	3	3	3	3	3	6	1	3	5	2	1	2	4	3	2	3	3	3	0	2	4	9	1
O06162	0	1	3	3	1	0	3	0	0	1	1	3	5	0	0	0	6	0	0	0	0	0	2	0	1	0	2	0	1	0	0	2	0	0	0	2	1	0	1	1	0	0	0	0	0	3	2	2	0
O06163	2	3	4	1	3	0	3	2	2	1	2	1	3	2	0	0	2	0	0	2	0	1	1	2	0	2	6	0	1	3	3	3	0	3	2	1	2	0	3	5	0	0	0	0	1	1	5	4	0
O06164	11	10	21	28	15	0	27	14	9	13	11	31	18	5	5	0	17	0	0	1	4	1	21	26	5	4	12	0	0	5	4	14	0	22	3	1	3	0	8	10	0	0	2	2	0	0	8	8	0
O06165	2	6	4	5	9	1	6	4	2	4	3	8	7	2	2	1	7	0	0	2	2	2	5	5	6	2	3	2	2	3	3	4	1	4	3	2	3	2	6	6	1	1	2	2	2	2	2	3	0
O06168	23	56	38	34	32	4	53	46	19	30	12	82	48	12	15	6	48	4	4	9	15	0	18	14	9	5	13	3	2	14	16	12	2	12	12	0	0	1	15	15	0	0	15	23	3	3	17	19	0
O06169	0	0	0	0	0	0	0	0	0	0	0	0	1	0	0	0	0	0	0	0	18	0	8	12	9	4	5	3	2	7	8	21	1	16	5	5	1	0	9	6	0	0	7	8	4	0	14	19	0
O06170	0	0	0	0	0	0	0	0	0	0	0	0	0	0	0	0	0	0	0	0	0	0	0	0	0	0	0	0	0	0	0	0	0	0	0	0	0	0	0	0	0	0	0	0	0	0	0	0	0
O06171	4	0	2	3	1	0	6	9	3	2	1	3	1	0	0	0	3	0	0	1	3	0	2	8	2	2	5	1	2	2	5	5	0	2	2	1	0	0	3	3	0	0	2	3	1	0	16	12	0
O06172	42	86	65	57	55	1	118	62	34	50	30	85	66	13	11	2	71	0	1	10	28	4	28	32	25	6	35	3	9	17	17	62	4	24	8	3	5	1	19	20	2	2	19	25	1	4	37	32	0
O06173	0	0	0	0	0	0	0	0	0	0	0	0	1	0	0	0	0	0	0	0	1	1	1	1	0	0	0	1	1	1	1	2	0	0	0	0	0	0	1	1	0	0	1	1	2	0	2	1	0
O06175	0	0	0	0	0	0	0	0	0	0	0	0	0	0	0	0	0	0	0	0	0	0	0	0	0	0	0	0	0	0	0	0	0	0	0	0	0	0	0	0	0	0	0	0	0	0	0	0	0
O06176	0	0	0	0	0	0	0	0	0	0	0	0	0	0	0	0	0	0	0	0	0	0	0	0	0	0	0	0	0	0	0	0	0	0	0	0	0	0	0	0	0	0	0	0	0	0	0	0	0
O06177	0	1	1	0	0	0	0	0	0	0	0	0	0	0	0	0	0	0	0	0	6	5	3	4	7	2	5	0	2	6	4	9	0	1	0	12	10	0	6	5	0	0	5	4	0	1	5	4	0
O06178	1	7	5	3	1	0	2	2	2	2	1	1	3	1	1	0	2	1	1	0	0	0	3	7	1	1	2	1	2	3	3	1	0	4	3	0	0	1	2	1	0	0	0	0	1	0	2	3	0
O06179	0	2	0	0	0	0	0	0	0	0	1	0	1	1	1	0	0	0	0	1	1	1	2	3	1	0	3	1	2	1	1	1	0	2	0	2	2	0	1	1	1	1	3	3	1	1	1	1	0
O06180	0	0	0	0	0	0	0	0	0	0	0	0	0	0	0	0	0	0	0	0	0	0	0	0	0	0	0	0	0	0	0	0	0	0	0	0	0	0	0	0	0	0	0	0	0	0	0	0	0
O06182	0	0	0	0	0	0	0	0	0	0	0	0	0	0	0	0	0	0	0	0	0	0	0	0	0	0	0	0	0	0	0	0	0	0	1	0	0	0	0	0	0	0	0	0	0	0	0	0	0
O06183	2	5	2	2	3	2	3	2	2	2	2	3	1	2	2	1	2	2	2	2	0	0	0	0	1	0	0	0	0	0	0	0	0	0	0	0	0	0	0	1	0	0	1	2	1	0	0	0	0
O06184	0	0	0	0	0	0	0	0	0	0	0	0	0	0	0	0	0	0	0	0	0	0	0	0	0	0	0	0	0	0	0	0	0	0	0	0	0	0	0	0	0	0	0	0	0	0	0	0	0
O06185	0	1	0	0	0	0	0	0	0	0	0	0	0	0	0	0	0	0	0	0	0	0	0	0	1	0	0	0	0	0	0	0	0	1	0	0	0	0	2	2	0	0	0	0	0	0	0	0	0
O06186	3	19	14	10	18	0	26	18	3	12	12	27	9	10	9	2	14	1	1	6	15	0	7	4	9	5	8	2	2	10	9	7	2	8	17	12	7	1	19	24	1	1	16	17	6	6	5	4	0
O06187	4	20	13	10	16	0	25	13	2	10	10	24	10	10	8	2	11	1	1	5	17	2	11	6	10	8	9	3	4	13	12	10	6	10	21	13	8	1	22	27	4	4	18	18	7	6	12	10	0
O06188	0	22	0	0	0	0	0	0	0	0	3	0	18	3	3	0	0	0	0	0	13	0	4	4	2	2	1	1	2	3	3	3	1	3	8	1	0	0	8	11	0	0	11	11	2	1	6	14	0
O06189	0	21	0	0	0	0	0	0	0	0	3	0	18	3	3	0	0	0	0	0	12	0	4	4	2	2	1	1	2	3	3	3	1	3	9	1	0	0	9	13	0	0	12	10	2	1	7	14	0
O06190	17	91	37	26	22	5	54	26	19	30	30	60	46	38	37	5	44	5	7	11	65	1	18	13	24	5	18	12	6	17	13	23	4	16	22	16	11	3	31	32	7	4	33	34	11	6	13	22	0
O06191	0	0	0	0	0	0	0	0	0	0	0	0	0	0	0	0	0	0	0	0	1	0	0	0	0	3	0	0	0	1	1	0	0	0	0	0	0	0	0	0	0	0	1	2	0	0	2	2	0
O06193	0	0	0	0	0	0	0	0	0	0	0	0	0	0	0	0	0	0	0	0	0	0	0	0	0	0	0	0	0	0	0	0	0	0	0	0	0	0	0	0	0	0	0	0	0	0	0	0	0
O06194	0	0	0	0	0	0	0	0	0	0	0	0	0	0	0	0	0	0	0	0	0	0	1	0	1	1	0	0	1	0	0	0	1	0	0	1	0	0	1	1	0	0	1	1	1	0	0	1	0
O06195	0	0	0	0	0	0	0	0	0	0	0	0	0	0	0	0	0	0	0	0	1	0	0	0	1	3	0	0	0	1	1	0	0	0	0	0	0	0	0	0	0	0	1	2	0	0	5	4	0
O06197	0	0	0	0	0	0	0	0	0	0	0	0	0	0	0	0	0	0	0	0	0	0	0	0	0	0	0	0	0	0	0	0	0	0	0	0	0	0	1	0	0	0	0	0	0	0	0	1	0
O06198	0	1	0	0	0	0	0	0	0	0	0	0	0	1	1	0	0	0	0	0	0	0	0	0	0	0	0	0	0	0	0	0	0	0	0	0	0	0	0	0	0	0	0	0	0	0	0	2	0
O06201	5	7	8	3	3	1	8	5	3	5	2	13	5	2	2	2	15	2	2	2	2	1	2	3	3	2	0	1	1	2	2	2	1	3	1	1	1	2	4	6	1	1	2	2	2	3	3	2	1
O06203	0	0	0	0	0	0	0	0	0	0	0	0	1	0	0	0	0	0	0	0	0	0	2	4	1	1	1	2	2	4	4	1	1	3	3	0	0	1	2	2	0	0	0	0	0	1	0	0	0
O06204	4	35	10	4	4	3	7	4	3	6	13	13	9	13	14	1	11	1	1	6	47	4	13	3	17	17	26	3	8	6	7	19	16	8	13	6	0	0	24	30	0	0	51	46	8	7	17	15	0
O06205	0	0	0	0	0	0	0	0	0	0	0	0	0	0	0	0	0	0	0	0	0	0	0	0	0	0	0	0	0	0	0	0	0	0	0	0	0	0	0	0	0	0	0	0	0	0	0	0	0
O06209	0	5	1	9	2	0	1	0	0	1	0	2	1	0	0	0	2	0	0	1	0	0	1	2	0	0	0	0	1	1	1	1	0	2	0	0	0	0	0	0	0	0	0	0	0	0	2	1	0
O06210	1	8	1	3	1	0	1	3	1	1	4	1	3	3	3	2	2	0	0	5	2	0	3	2	3	5	3	3	2	3	3	2	3	2	3	2	1	0	2	3	1	1	3	3	2	4	7	4	0
O06213	0	0	0	0	0	0	0	0	0	0	0	0	0	0	0	0	0	0	0	0	0	0	0	0	0	0	0	0	0	0	0	0	0	0	0	0	0	0	0	0	0	0	0	0	0	0	0	0	0
O06214	0	0	0	0	0	0	0	0	0	0	0	0	0	0	0	0	0	0	0	0	8	0	5	5	6	5	5	4	4	5	6	6	4	5	4	6	5	3	6	5	2	0	9	7	3	4	6	5	0
O06216	0	0	0	0	0	0	0	0	0	0	0	0	0	0	0	0	0	0	0	0	1	1	4	6	0	2	1	1	0	1	1	23	0	1	0	0	0	0	0	0	0	0	2	7	0	0	14	12	0
O06217	0	0	0	0	0	0	0	0	0	0	0	0	0	0	0	0	0	0	0	0	1	0	1	0	0	0	0	0	0	0	0	0	0	0	0	0	0	0	1	1	0	0	0	0	0	0	0	0	0
O06218	0	0	0	0	0	0	0	0	0	0	0	0	0	0	0	0	0	0	0	0	0	0	0	0	0	0	0	0	0	0	0	0	0	0	0	0	0	0	0	0	0	0	0	0	0	0	0	0	0
O06222	0	1	0	0	0	0	0	0	0	0	1	0	3	1	2	0	0	0	0	0	4	0	8	6	6	5	4	5	6	5	5	4	5	6	6	8	7	5	5	5	5	0	6	6	4	3	5	5	0
O06224	20	5	22	64	6	0	50	23	11	22	3	30	9	2	1	0	32	0	0	0	7	0	2	2	2	2	3	1	2	3	3	3	2	2	4	1	2	1	1	1	1	0	5	3	1	1	2	1	0
O06229	0	0	0	0	0	0	0	0	0	0	0	0	0	0	0	0	0	0	0	0	9	1	0	0	0	1	0	0	0	0	0	0	0	0	0	1	1	0	0	0	0	0	1	1	0	0	1	1	0
O06230	0	0	0	0	0	0	0	0	0	0	0	0	0	0	0	0	0	0	0	0	0	0	0	0	0	1	0	0	0	0	0	0	0	0	0	0	0	0	0	0	0	0	0	0	0	0	1	1	0
O06231	0	0	0	0	0	0	0	0	0	0	0	0	0	0	0	0	0	0	0	0	0	0	0	0	0	0	0	0	0	0	0	0	0	0	0	0	0	0	0	0	0	0	0	0	0	0	0	0	0
O06232	3	8	4	5	3	0	3	7	1	3	2	7	7	2	1	1	5	1	1	4	6	2	2	2	3	3	6	3	3	2	2	3	3	3	2	2	2	0	1	3	0	1	2	3	5	2	4	3	0
O06233	0	0	0	0	0	0	0	0	0	0	0	0	0	0	0	0	0	0	0	0	0	0	0	0	0	0	0	0	0	0	0	0	0	0	0	0	0	0	0	0	0	0	0	0	0	0	0	0	0
O06237	1	0	0	0	0	0	0	1	1	0	0	0	8	0	0	0	0	0	0	0	5	0	1	0	12	0	2	0	0	1	1	0	1	0	0	2	2	0	1	2	0	0	3	5	0	0	0	1	0
O06238	0	0	0	0	0	0	0	0	0	0	0	0	0	0	0	0	0	0	0	0	0	0	0	0	0	0	0	0	0	0	0	0	0	0	0	0	0	0	0	0	0	0	0	0	0	0	0	0	0
O06239	0	0	0	0	0	0	0	0	0	0	0	0	0	0	0	0	0	0	0	0	1	1	1	1	1	1	1	0	0	1	1	2	1	1	1	1	1	0	1	1	0	0	1	1	1	1	1	1	0
O06240	6	18	19	6	11	4	24	11	7	12	5	30	3	9	8	1	23	1	1	11	4	2	5	4	1	4	4	3	2	3	1	2	1	3	2	3	3	0	2	2	0	0	6	4	3	1	9	8	0
O06241	0	0	0	0	0	0	0	0	0	0	0	0	0	0	0	0	0	0	0	0	0	0	0	0	0	1	0	0	0	0	0	0	0	0	0	0	0	0	0	0	0	0	0	0	0	0	1	1	0
O06242	0	9	0	1	0	0	0	0	0	0	0	0	0	1	1	0	0	0	0	0	0	0	0	0	0	1	0	0	0	0	0	0	0	0	0	0	0	0	0	0	0	0	0	0	0	0	1	1	0
O06243	0	0	0	0	0	0	0	0	0	0	0	0	0	0	0	0	0	0	0	0	0	0	0	0	0	0	0	0	0	0	0	0	0	0	0	0	0	0	0	0	0	0	0	0	0	0	0	0	0
O06246	0	0	0	0	0	0	0	0	0	0	0	0	0	0	0	0	0	0	0	0	0	0	0	0	0	0	0	0	0	0	0	0	0	0	0	0	0	0	0	0	0	0	0	0	0	0	0	0	0
O06247	0	31	26	0	20	0	124	1	0	9	0	14	0	0	0	2	0	0	0	0	6	1	11	4	0	0	8	10	0	0	8	6	0	4	4	2	4	8	1	0	0	0	0	3	0	1	1	5	14
O06248	0	59	1	0	0	0	0	0	0	0	0	0	0	0	0	1	0	0	0	0	3	0	0	0	0	0	13	0	0	0	2	0	0	0	0	1	1	0	0	1	0	0	0	0	0	0	0	1	0
O06249	13	20	16	19	13	1	16	15	11	13	6	28	19	8	8	1	22	1	1	4	7	2	3	5	10	4	3	3	3	6	5	3	5	2	3	13	5	1	5	6	2	2	9	10	3	2	10	7	1
O06250	2	4	2	2	1	1	3	2	1	2	1	4	2	1	2	2	2	0	0	2	1	0	1	1	1	2	1	0	2	1	0	1	3	1	2	1	2	0	1	1	1	1	1	1	1	1	3	3	0
O06251	0	0	0	0	0	0	0	0	0	0	0	0	0	0	0	0	0	0	0	0	0	0	0	0	0	0	0	0	0	0	0	0	0	0	0	0	0	0	0	0	0	0	0	0	0	0	0	0	0
O06252	0	0	0	0	0	0	0	0	0	0	0	0	0	0	0	0	0	0	0	0	0	0	0	0	0	0	0	0	0	0	0	0	0	0	0	0	0	0	0	0	0	0	0	0	0	0	0	0	0
O06254	0	0	0	0	0	0	0	0	0	0	0	0	0	0	0	0	0	0	0	0	0	0	0	0	0	0	0	0	0	0	0	0	0	0	0	0	0	0	0	0	0	0	0	0	0	0	1	0	0
O06255	0	0	0	0	0	0	0	0	0	0	0	0	0	0	0	0	0	0	0	0	0	0	0	0	0	0	0	0	0	0	0	0	0	0	0	0	0	0	0	0	0	0	0	0	0	0	0	0	0
O06256	0	0	0	0	0	0	0	0	0	0	0	0	0	0	0	0	0	0	0	0	0	0	0	0	0	0	0	0	0	0	0	0	0	0	0	0	0	0	0	0	0	0	0	0	0	0	0	0	0
O06257	0	0	0	0	0	0	0	0	0	0	0	0	0	0	0	0	0	0	0	0	0	0	0	0	0	0	0	0	0	0	0	0	0	0	0	0	0	0	0	0	0	0	0	0	0	0	0	0	0
O06258	2	6	6	4	10	2	6	9	4	6	3	9	6	3	3	2	8	1	1	4	5	3	2	3	3	3	2	3	2	3	2	3	1	3	2	3	1	1	3	3	1	0	4	4	3	3	4	5	0
O06261	0	0	0	0	0	0	0	0	0	0	0	0	0	0	0	0	0	0	0	0	0	0	0	0	0	0	0	0	0	0	0	0	0	0	0	0	0	0	0	0	0	0	0	0	0	0	0	0	0
O06262	0	0	0	0	0	0	0	0	0	0	0	0	0	0	0	0	0	0	0	0	0	0	0	0	0	0	0	0	0	0	0	0	0	0	0	0	0	0	0	0	0	0	0	0	0	0	0	0	0
O06263	0	0	0	0	0	0	0	0	0	0	0	0	0	0	0	0	0	0	0	0	0	0	0	0	0	0	0	0	0	0	0	0	0	0	0	0	0	0	0	0	0	0	0	0	0	0	0	0	0
O06264	0	0	0	0	0	0	0	0	0	0	0	0	1	0	0	1	0	0	0	0	0	1	1	1	1	2	1	1	1	1	1	2	1	1	1	1	1	1	1	1	1	1	2	1	1	1	3	3	0
O06266	16	71	22	9	14	2	30	34	11	18	11	35	14	16	14	1	17	1	1	1	21	3	13	12	12	4	9	1	2	9	9	25	0	17	5	4	4	1	13	18	1	2	20	25	1	2	18	15	0
O06267	0	0	0	0	0	0	0	0	0	0	0	0	0	0	0	0	0	0	0	0	0	0	0	0	0	0	0	0	0	0	0	0	0	0	0	0	0	0	0	0	0	0	0	0	0	0	0	0	0
O06269	0	0	0	0	0	0	0	0	0	0	0	0	0	0	0	0	0	0	0	0	0	0	0	0	0	0	0	0	0	0	0	0	0	0	0	0	0	0	0	0	0	0	0	0	0	0	0	0	0
O06270	0	0	0	0	0	0	0	0	0	0	0	0	0	0	0	0	0	0	0	0	0	0	0	0	0	0	0	0	0	0	0	0	0	0	0	0	0	0	0	0	0	0	0	0	0	0	0	0	0
O06271	0	0	0	0	0	0	0	0	0	0	0	0	0	0	0	0	0	0	0	0	0	0	0	0	0	0	0	0	0	0	0	0	0	0	0	0	0	0	0	0	0	0	0	0	0	0	0	0	0
O06272	7	0	90	85	92	0	157	8	5	64	3	142	42	0	0	1	139	0	0	0	0	0	1	0	0	0	0	0	0	0	0	0	0	0	0	2	2	0	0	0	0	0	0	0	0	0	0	0	0
O06277	0	0	0	0	0	0	0	0	0	0	0	0	0	0	0	0	0	0	0	0	0	0	0	0	0	1	0	0	0	0	0	0	0	0	0	0	0	0	0	0	0	0	0	0	0	0	1	1	0
O06278	0	0	0	0	0	0	0	0	0	0	0	0	0	0	0	0	0	0	0	0	0	0	0	0	0	0	0	0	0	0	0	0	0	0	0	0	0	0	0	0	0	0	0	0	0	0	0	0	0
O06279	0	0	0	0	0	0	0	0	0	0	0	0	0	0	0	0	0	0	0	0	2	0	0	1	1	1	0	0	0	0	0	0	0	0	1	0	0	0	1	0	0	0	0	0	0	0	1	1	0
O06282	0	0	0	0	0	0	0	0	0	0	0	0	1	0	0	0	0	0	0	0	1	1	1	1	1	1	1	0	0	0	0	0	1	1	1	1	1	0	1	1	1	1	1	1	1	1	0	0	0
O06283	0	0	0	0	0	0	0	0	0	0	0	0	0	0	0	0	0	0	0	0	0	0	0	0	0	0	0	0	0	0	0	0	0	0	0	0	0	0	0	0	0	0	0	0	0	0	0	0	0
O06288	0	0	0	0	0	0	0	0	0	0	0	0	0	0	0	0	0	0	0	0	2	0	1	1	0	0	1	1	1	2	2	1	0	1	1	2	0	1	0	0	0	0	1	1	0	0	0	0	0
O06289	0	0	0	0	0	0	0	0	0	0	0	0	0	0	0	0	0	0	0	0	8	2	6	2	28	13	3	2	2	3	4	12	5	2	3	17	15	0	21	21	0	0	3	3	1	7	17	10	0
O06291	5	21	14	0	17	0	71	7	5	11	6	30	4	9	7	1	22	1	1	1	28	3	5	3	10	6	4	4	3	3	3	5	10	5	8	4	4	3	10	13	2	2	9	9	3	2	6	6	0
O06292	0	0	0	0	0	0	0	0	0	0	0	0	0	0	0	0	0	0	0	0	0	0	0	0	0	0	0	0	0	0	0	0	0	0	0	0	0	0	0	0	0	0	0	0	0	0	0	0	0
O06293	12	38	29	19	23	4	80	28	11	23	11	81	14	10	8	13	72	10	9	9	13	4	5	3	6	3	3	7	7	6	6	2	3	5	5	7	6	4	2	3	5	3	14	12	5	8	8	6	3
O06294	6	24	17	11	15	2	50	16	6	15	7	47	8	4	2	6	50	2	2	2	5	0	1	0	0	0	1	1	1	0	0	0	0	0	0	1	0	0	0	0	0	0	5	4	0	2	4	2	0
O06295	0	0	0	0	0	0	0	0	0	0	0	0	0	0	0	0	0	0	0	0	0	0	0	0	0	0	0	0	0	0	0	0	0	0	0	0	0	0	0	0	0	0	0	0	0	0	0	0	0
O06296	1	0	0	0	2	0	0	0	0	0	0	0	1	0	0	0	0	0	0	0	2	1	2	1	4	3	3	2	3	5	3	3	2	1	4	4	7	0	4	1	1	0	2	3	2	1	2	3	0
O06298	0	0	0	0	0	0	0	0	0	0	0	0	0	0	0	0	0	0	0	0	0	0	0	0	0	0	0	0	0	0	0	0	0	0	0	0	0	0	0	0	0	0	1	0	0	0	0	0	0
O06299	0	0	0	0	0	0	0	0	0	0	0	0	0	0	0	0	0	0	0	0	0	0	0	0	0	0	0	0	0	0	0	0	0	0	0	0	0	0	0	0	0	0	0	0	0	0	0	0	0
O06300	0	0	0	0	0	0	0	0	0	0	0	0	0	0	0	0	0	0	0	0	0	0	0	0	0	0	0	0	0	0	0	0	0	0	0	0	0	0	0	0	0	0	0	0	0	0	0	0	0
O06302	0	0	0	0	0	0	0	0	0	0	0	0	0	0	0	0	0	0	0	0	4	0	6	8	8	3	6	2	5	8	9	9	3	7	2	10	11	1	1	1	1	1	4	2	1	2	8	8	0
O06307	1	3	6	3	1	1	2	2	2	3	1	5	3	2	2	0	3	1	1	2	0	0	2	6	1	1	2	1	1	2	2	2	0	4	3	0	0	0	1	2	0	0	0	0	1	0	2	2	0
O06308	0	0	0	0	0	0	0	0	0	0	0	0	0	0	0	0	0	0	0	0	0	0	0	0	0	0	0	0	0	0	0	0	0	0	0	0	0	0	0	0	0	0	0	0	0	0	0	0	0
O06309	0	0	0	0	0	0	0	0	0	0	0	0	0	2	1	1	0	0	0	0	3	0	1	0	1	1	1	0	0	0	0	0	0	0	1	2	2	0	1	2	0	0	2	2	1	0	3	1	0
O06310	0	0	0	0	0	0	0	0	0	0	0	0	0	0	0	0	0	0	0	0	0	0	0	0	0	0	0	0	0	0	0	0	0	0	0	0	0	0	0	0	0	0	0	0	0	0	1	1	0
O06311	0	0	0	0	0	0	0	0	0	0	0	0	0	0	0	0	0	0	0	0	0	0	0	0	0	0	0	0	0	0	0	0	0	0	0	0	0	0	0	0	0	0	0	0	0	0	0	0	0
O06312	1	10	2	0	2	0	8	2	1	2	2	4	5	2	3	2	2	0	0	3	14	2	4	4	6	5	5	1	1	9	8	6	2	7	15	9	6	1	13	17	2	2	12	12	6	2	3	2	0
O06314	1	1	0	0	0	0	0	0	0	0	0	0	1	2	2	1	0	0	0	0	5	0	1	3	5	2	5	2	2	5	5	1	1	1	5	4	0	0	5	4	0	0	4	3	1	4	7	8	0
O06315	0	0	0	0	0	0	0	0	0	0	1	0	0	0	0	0	0	0	0	2	0	0	0	0	0	0	0	0	0	0	0	0	0	0	0	0	0	0	0	0	0	0	0	0	0	0	1	1	0
O06316	6	65	10	8	11	0	14	7	5	10	4	24	12	2	1	2	19	0	0	4	3	0	2	2	0	3	1	1	0	2	1	0	0	0	1	4	1	0	3	3	0	0	8	9	2	0	6	8	0
O06317	0	0	0	0	0	0	0	0	0	0	0	0	0	0	0	0	0	0	0	0	0	0	0	0	0	0	0	0	0	0	0	0	0	0	0	0	0	0	0	0	0	0	0	0	0	0	0	0	0
O06319	0	0	0	0	0	0	0	0	0	0	0	0	0	0	0	0	0	0	0	0	0	0	0	0	0	0	0	0	0	0	0	0	0	0	0	0	0	0	0	0	0	0	0	0	0	0	0	0	0
O06320	0	0	0	0	0	0	0	0	0	0	0	0	0	0	0	0	0	0	0	0	0	0	1	2	0	0	0	0	0	0	0	1	0	1	0	0	0	0	0	0	0	0	0	0	0	0	1	0	0
O06321	0	0	0	0	0	0	0	0	0	0	0	0	0	0	0	0	0	0	0	0	0	0	1	2	0	0	0	0	0	0	0	1	0	1	0	0	0	0	0	0	0	0	0	0	0	0	1	0	0
O06325	0	1	0	0	0	0	0	0	0	0	0	0	1	0	2	0	0	0	0	1	1	1	1	1	1	1	1	1	1	1	1	1	1	1	1	3	2	1	1	1	1	1	1	1	1	1	1	1	1
O06326	3	5	4	2	2	1	4	3	1	2	2	7	2	1	3	2	5	2	2	3	1	1	1	1	1	1	1	1	1	1	1	1	1	1	1	1	1	1	1	1	1	1	1	1	1	1	1	1	1
O06327	1	4	1	1	0	1	3	1	1	1	1	11	1	2	1	1	9	1	1	2	1	1	1	1	1	1	1	1	1	1	1	1	1	1	1	1	1	1	1	1	1	1	1	1	1	1	1	1	1
O06328	0	0	0	0	0	0	0	0	0	0	0	0	0	0	0	0	0	0	0	0	1	1	3	4	0	2	1	1	0	1	1	12	0	1	0	0	0	0	0	0	0	0	1	2	0	0	8	8	0
O06329	16	87	16	15	21	3	43	16	11	15	20	37	23	20	20	2	21	0	0	6	34	4	7	6	19	10	17	5	6	16	14	20	10	7	11	7	2	2	21	24	1	1	23	24	5	6	20	16	0
O06330	0	0	0	1	0	0	0	0	0	0	0	0	2	0	0	0	0	0	0	0	2	0	1	0	0	1	2	1	1	2	1	2	0	1	1	0	0	1	1	0	0	0	2	2	0	1	2	1	0
O06331	0	0	0	0	0	0	0	0	0	0	0	0	0	0	0	0	0	0	0	0	0	0	0	0	0	0	0	0	0	0	0	0	0	0	0	0	0	0	0	0	0	0	0	0	0	0	0	0	0
O06334	3	7	3	2	4	0	3	4	2	3	3	4	4	2	2	0	3	0	0	6	2	0	4	2	3	3	3	2	2	3	3	3	3	4	2	6	2	0	6	5	0	0	4	5	4	4	4	2	0
O06335	1	7	5	3	1	1	5	1	1	2	0	6	6	2	3	1	3	0	0	7	4	0	3	4	4	3	5	2	3	4	3	4	2	2	1	4	2	1	3	5	0	0	4	4	1	3	10	9	0
O06336	0	33	0	0	0	0	0	0	0	0	1	0	1	1	1	0	1	0	0	0	7	2	6	3	9	5	7	0	3	6	3	9	4	2	3	5	3	0	7	6	0	0	5	5	2	2	10	6	0
O06337	0	0	0	0	0	0	0	0	0	0	0	0	0	0	0	0	0	0	0	0	2	0	1	4	0	0	0	0	1	0	0	0	0	0	0	0	0	0	1	1	0	0	0	0	0	0	1	1	0
O06338	15	108	24	11	19	3	46	28	11	22	16	39	18	19	20	7	31	1	1	9	26	3	16	17	19	4	14	2	5	14	14	27	2	22	11	4	4	1	17	23	1	1	21	28	2	2	26	23	0
O06339	53	79	41	57	41	1	72	93	42	33	11	62	47	10	10	2	52	2	2	37	2	0	18	27	12	4	18	6	7	12	9	18	3	3	2	2	0	1	7	7	4	3	2	2	0	0	43	38	0
O06342	0	0	0	0	0	0	0	0	0	0	0	0	0	0	0	0	0	0	0	0	0	0	0	0	0	0	0	0	0	0	0	0	0	0	0	0	0	0	0	0	0	0	0	0	0	0	0	0	0
O06343	2	13	0	0	0	1	0	0	0	0	0	0	4	1	1	0	0	0	0	0	0	0	0	1	1	1	0	0	0	1	1	0	0	2	0	0	0	0	1	1	0	0	0	0	0	0	0	0	0
O06344	0	0	0	0	0	0	0	0	0	0	0	0	0	0	0	0	0	0	0	0	0	0	0	0	0	0	0	0	0	0	0	0	0	0	0	0	0	0	0	0	0	0	0	0	0	0	0	0	0
O06345	0	0	0	0	0	0	0	0	0	0	0	0	0	0	0	0	0	0	0	0	0	0	0	0	0	0	0	0	0	0	0	0	0	0	0	0	0	0	0	0	0	0	0	0	0	0	2	0	0
O06346	0	0	0	0	0	0	0	0	0	0	0	0	0	0	0	0	0	0	0	0	0	0	0	0	0	0	0	0	0	0	0	0	0	0	0	0	0	0	0	0	0	0	0	0	0	0	0	0	0
O06347	0	0	0	0	0	0	0	0	0	0	0	0	0	0	0	0	0	0	0	0	1	0	0	0	0	4	0	0	0	0	0	0	0	0	0	4	2	0	0	0	0	0	2	2	0	0	5	5	0
O06348	33	77	45	44	34	1	65	47	25	32	25	59	46	9	8	1	51	0	0	6	27	4	29	31	23	9	39	4	10	16	16	63	6	23	10	3	5	1	22	21	3	3	19	25	3	3	36	34	0
O06349	0	0	0	0	0	0	0	0	0	0	0	0	0	0	0	0	0	0	0	0	0	0	0	0	6	0	0	0	0	0	1	0	0	0	0	0	0	0	1	1	0	0	0	0	0	0	1	1	0
O06350	30	27	27	27	30	0	38	40	15	21	10	61	14	2	2	0	92	0	0	1	3	1	6	5	6	0	6	0	3	1	2	2	2	5	0	0	0	0	0	0	0	0	1	2	0	0	3	4	0
O06351	0	0	0	0	0	0	0	0	0	0	0	0	0	0	0	0	0	0	0	0	6	3	0	1	18	1	1	0	0	0	0	0	0	1	0	6	4	0	0	0	0	0	3	4	0	0	9	4	0
O06352	0	0	0	0	0	0	0	0	0	0	0	0	0	0	0	0	0	0	0	0	0	0	0	0	0	0	0	0	0	0	0	0	0	0	0	0	0	0	0	0	0	0	0	0	0	0	0	0	0
O06353	1	12	0	3	1	1	0	1	1	0	0	0	0	2	2	0	0	1	1	4	10	0	2	1	1	6	5	0	0	0	1	3	3	0	2	0	0	0	3	6	0	0	7	7	2	0	4	4	0
O06354	0	0	0	0	0	0	0	0	0	0	0	0	0	0	0	0	0	0	0	0	0	0	0	0	0	0	0	0	0	0	0	0	0	0	0	0	0	0	0	0	0	0	0	0	0	0	0	0	0
O06355	0	0	0	0	0	0	0	0	0	0	0	0	0	0	0	0	0	0	0	0	0	0	0	0	0	0	0	0	0	0	0	0	0	0	0	0	0	0	0	0	0	0	0	0	0	0	0	0	0
O06356	0	0	0	0	0	0	0	0	0	0	0	0	0	0	0	0	0	0	0	0	0	0	0	0	0	0	0	0	0	0	0	0	0	0	0	0	0	0	0	0	0	0	0	0	0	0	0	0	0
O06357	0	0	0	0	0	0	0	0	0	0	0	0	0	0	0	0	0	0	0	0	0	0	0	0	0	0	0	0	0	0	0	0	0	0	0	0	0	0	0	0	0	0	0	0	0	0	0	0	0
O06359	43	92	64	54	66	30	81	59	33	53	60	110	53	58	56	33	91	31	32	31	8	3	8	4	5	4	5	4	6	13	13	7	5	11	4	9	4	4	7	9	1	0	10	10	3	4	10	9	2
O06361	0	0	0	0	0	0	0	0	0	0	0	0	0	0	0	0	0	0	0	0	0	0	0	0	0	0	0	0	0	0	0	0	0	0	0	0	0	0	0	0	0	0	0	0	0	0	0	0	0
O06362	20	0	25	42	19	4	51	47	17	19	20	36	30	2	2	6	37	2	2	1	14	1	4	1	7	0	1	0	0	0	0	3	0	3	0	2	2	0	0	2	0	0	7	6	0	1	1	1	0
O06363	4	12	8	4	4	5	10	5	3	5	5	9	5	4	4	3	7	4	3	5	3	3	3	3	4	4	4	3	5	3	3	3	4	4	4	3	4	2	3	3	2	2	4	5	2	3	3	4	3
O06364	0	0	0	0	0	0	0	0	0	0	0	0	0	0	0	0	0	0	0	0	0	0	0	0	0	0	0	0	0	0	0	0	0	0	0	0	0	0	0	0	0	0	0	0	0	0	0	0	0
O06365	0	0	0	0	0	0	0	0	0	0	0	0	0	0	0	0	0	0	0	0	0	0	0	0	0	0	0	0	0	0	0	0	0	0	0	0	0	0	0	0	0	0	0	0	0	0	0	0	0
O06366	1	0	4	1	1	0	1	1	1	1	1	2	1	0	0	0	1	0	0	0	0	2	2	0	0	0	1	1	0	0	1	4	0	0	1	0	1	0	1	2	0	0	1	0	1	2	0	0	0
O06367	0	46	1	0	0	0	0	0	0	0	0	0	0	0	0	1	0	0	0	0	4	0	0	0	0	0	14	0	0	0	2	0	0	0	0	1	1	0	0	1	0	0	0	0	0	0	0	1	0
O06368	0	0	0	0	0	0	0	0	0	0	0	0	0	0	0	0	0	0	0	0	0	0	0	0	0	0	0	0	0	0	0	0	0	0	0	0	0	0	0	0	0	0	0	0	0	0	0	0	0
O06369	0	0	0	0	0	0	0	0	0	0	0	0	0	0	0	0	0	0	0	0	14	0	0	1	0	0	10	0	0	0	3	1	0	0	1	4	2	0	0	1	0	0	0	0	1	0	1	3	0
O06370	0	0	0	0	0	0	0	0	0	0	0	0	0	0	0	0	0	0	0	0	11	0	0	0	0	0	7	0	0	0	3	2	0	0	1	2	1	0	0	0	0	0	0	0	0	0	1	2	0
O06371	0	0	0	0	0	0	0	0	0	0	0	0	0	0	0	0	0	0	0	0	2	0	0	0	0	0	1	0	0	0	0	2	0	0	1	1	1	0	0	0	0	0	2	0	0	0	1	2	0
O06372	0	0	0	0	0	0	0	0	0	0	0	0	0	0	0	0	0	0	0	0	0	0	0	0	0	0	0	0	0	0	0	0	0	0	0	0	0	0	0	0	0	0	0	0	0	0	0	0	0
O06375	0	0	0	0	0	0	0	0	0	0	0	0	0	0	0	0	0	0	0	0	0	0	0	0	0	0	0	0	0	0	0	0	0	0	0	0	0	0	0	0	0	0	0	0	0	0	0	0	0
O06376	9	9	6	4	6	3	16	4	4	8	7	8	7	5	4	1	10	1	1	2	17	0	5	7	12	9	9	5	2	5	6	9	13	4	4	7	4	2	16	15	0	0	36	33	2	3	12	9	0
O06377	0	0	0	0	0	0	0	0	0	0	0	0	0	0	0	0	0	0	0	0	0	0	0	0	0	0	0	0	0	0	0	0	0	0	0	0	0	0	0	0	0	0	0	0	0	0	0	0	0
O06378	0	0	0	0	0	0	0	0	0	0	0	0	0	0	0	0	0	0	0	0	0	0	0	1	0	0	0	0	0	0	0	1	0	0	0	0	0	0	0	0	0	0	0	0	0	1	0	0	0
O06380	0	0	0	0	0	0	0	0	0	0	0	0	0	0	0	0	0	0	0	0	4	0	3	0	3	1	0	2	2	3	3	1	1	1	2	0	0	1	1	1	0	0	4	4	0	0	1	1	0
O06381	0	0	0	0	0	0	0	0	0	0	0	0	0	0	0	0	0	0	0	0	0	0	0	0	0	2	0	0	0	0	0	0	0	0	0	0	0	0	0	0	0	0	0	0	0	0	2	2	0
O06384	0	0	1	0	1	0	1	0	0	1	0	2	1	0	0	0	1	0	0	0	2	0	1	1	2	0	1	1	1	1	1	1	0	1	0	1	0	1	1	1	0	0	1	1	0	2	1	1	0
O06389	0	0	0	0	0	0	0	0	0	0	0	0	0	0	0	0	0	0	0	0	0	0	0	0	0	0	0	0	0	0	0	0	0	0	0	0	0	0	0	0	0	0	0	0	0	0	0	0	0
O06391	6	14	15	7	10	4	23	12	6	11	3	24	3	9	7	1	21	1	1	9	4	2	4	2	0	4	4	2	2	2	1	3	1	4	2	3	3	0	1	2	0	0	5	3	2	0	9	8	0
O06392	1	14	2	10	4	1	3	1	1	3	4	5	5	1	1	0	4	0	0	4	11	0	4	3	9	4	5	4	5	9	9	3	4	7	9	3	4	1	8	7	4	3	11	13	4	4	11	9	0
O06393	0	3	0	0	0	0	0	0	0	0	0	0	0	1	0	0	0	0	0	0	2	0	2	1	4	1	1	3	3	3	3	2	3	2	3	1	1	0	4	3	1	1	1	1	2	2	2	2	0
O06394	0	1	0	0	0	0	0	0	0	0	0	0	0	1	1	0	0	0	0	0	1	0	1	0	1	1	0	0	0	0	0	0	1	0	1	1	1	0	2	2	0	0	1	1	1	1	3	2	0
O06396	3	5	4	1	3	0	4	2	2	3	4	4	3	4	4	1	4	2	2	2	20	2	8	7	7	6	12	2	2	7	9	12	4	7	12	9	6	2	10	11	2	1	22	21	6	3	13	17	0
O06397	0	0	0	0	0	0	0	0	0	0	0	0	0	0	0	0	0	0	0	0	0	0	0	0	0	0	0	0	0	0	0	0	0	0	0	0	0	0	0	0	0	0	0	0	0	0	0	0	0
O06401	4	0	6	2	2	0	23	8	4	2	2	7	3	0	0	1	4	0	0	2	1	0	0	0	2	1	1	0	0	1	0	1	0	1	1	2	2	0	2	2	0	0	1	1	1	0	1	1	0
O06403	0	0	0	0	0	0	0	0	0	0	0	0	0	0	0	0	0	0	0	0	0	0	0	0	0	0	0	0	0	0	0	0	0	0	0	0	0	0	0	0	0	0	0	0	0	0	0	0	0
O06404	0	0	0	0	0	0	0	0	0	0	0	0	0	0	0	0	0	0	0	0	0	0	0	0	0	0	0	0	0	0	0	0	0	0	0	0	0	0	0	0	0	0	0	0	0	0	0	0	0
O06406	0	0	0	0	0	0	0	0	0	0	0	0	0	1	1	0	0	0	0	0	1	0	0	0	0	0	1	0	0	0	0	0	0	1	1	0	0	0	0	0	0	0	1	1	0	0	0	0	0
O06407	0	0	0	0	0	0	0	0	0	0	0	0	0	0	0	0	0	0	0	0	0	0	0	0	0	0	0	0	0	0	0	0	0	0	0	0	0	0	0	0	0	0	0	0	0	0	0	0	0
O06408	20	56	32	29	26	4	45	44	18	27	11	67	42	12	14	6	42	4	4	9	15	0	18	13	9	5	12	3	2	14	16	12	2	12	12	0	0	1	13	13	0	0	15	22	3	3	16	19	0
O06409	0	0	0	0	0	0	0	0	0	0	0	0	0	0	0	0	0	0	0	0	0	0	0	0	0	0	0	0	0	0	0	0	0	0	0	0	0	0	0	0	0	0	0	0	0	0	0	0	0
O06410	0	0	0	0	0	0	0	0	0	0	0	0	0	0	0	0	0	0	0	0	0	0	0	0	0	0	0	0	0	0	0	0	0	0	0	0	0	0	0	0	0	0	0	0	0	0	0	0	0
O06411	1	1	2	6	3	0	6	1	1	2	2	5	1	2	2	2	4	1	1	1	1	0	1	1	2	2	1	1	1	2	2	2	2	1	1	0	0	0	1	1	0	0	2	2	0	2	2	2	0
O06412	2	14	7	2	3	0	4	1	0	4	3	5	3	3	2	0	3	0	0	1	21	1	8	2	21	1	4	2	2	12	11	16	1	5	1	8	4	1	11	15	0	0	11	9	0	1	17	16	0
O06413	37	84	61	49	54	2	99	59	34	45	26	76	63	9	8	2	64	0	0	8	28	4	28	31	24	7	38	3	9	15	15	62	5	23	8	3	5	1	21	20	2	3	22	27	2	2	36	35	0
O06414	9	26	16	16	16	0	21	16	12	15	9	35	18	6	6	2	24	0	0	3	3	0	13	14	6	3	10	2	1	8	8	6	1	9	4	0	1	1	6	5	0	0	2	2	1	0	8	8	0
O06415	0	0	0	0	0	0	0	0	0	0	0	0	0	0	0	0	0	0	0	0	0	0	1	0	0	0	0	0	0	0	0	0	0	0	0	0	0	0	0	0	0	0	1	0	0	0	0	0	0
O06416	0	0	0	0	0	0	0	0	0	0	0	0	0	0	0	0	0	0	0	0	0	0	0	0	0	0	0	0	0	0	0	0	0	0	0	0	0	0	0	0	0	0	0	0	0	0	0	0	0
O06417	21	56	33	32	26	4	45	45	18	26	12	68	46	12	15	5	43	4	4	9	15	0	18	14	9	5	12	3	2	13	16	12	2	12	12	0	0	1	15	14	0	0	15	23	3	3	17	19	0
O06418	3	3	4	4	4	0	5	9	3	4	1	5	12	3	2	0	8	0	0	3	1	0	5	4	16	2	3	1	0	8	5	8	2	2	1	9	9	0	5	4	0	0	1	1	3	1	16	11	0
O06420	15	110	28	13	22	3	49	31	10	23	16	45	19	19	20	3	43	1	1	4	27	3	19	17	19	4	13	2	5	12	12	28	2	22	11	4	4	1	18	22	2	4	22	27	2	3	26	22	0
O06421	1	7	5	3	1	0	4	1	1	2	0	5	6	2	3	0	3	0	0	7	4	0	3	4	3	2	5	3	3	4	3	4	3	2	1	2	2	1	4	2	0	0	4	4	1	2	10	9	0
O06422	0	0	0	0	0	0	0	0	0	0	0	0	0	0	0	0	0	0	0	0	0	0	0	0	0	0	0	0	0	0	0	0	0	0	0	0	0	0	0	0	0	0	0	0	0	0	0	0	0
O06423	5	37	6	4	4	3	7	5	3	5	14	10	9	17	17	1	7	1	1	4	49	4	12	3	17	17	26	2	7	5	7	19	16	8	13	6	0	0	24	30	0	0	53	44	8	7	18	15	0
O06425	0	0	0	0	0	0	0	0	0	0	0	0	0	0	0	0	0	0	0	0	0	0	0	0	0	0	0	0	0	0	0	0	0	0	0	0	0	0	0	0	0	0	0	0	0	0	0	0	0
O06426	20	100	37	29	23	5	48	23	20	29	30	64	53	40	39	8	42	4	7	12	67	1	20	11	24	4	19	10	7	18	13	25	5	18	24	18	15	3	32	35	6	4	37	36	11	6	14	22	0
O06427	3	27	4	4	3	0	6	6	2	4	3	10	8	13	11	0	6	0	0	3	17	0	9	7	6	2	6	3	0	4	4	8	0	5	3	0	1	0	4	3	1	1	7	8	2	1	8	13	0
O06428	6	22	3	2	4	2	6	8	4	4	4	8	4	4	4	1	6	2	2	3	3	1	2	2	2	2	2	2	2	2	2	2	2	2	2	1	1	1	2	2	2	2	2	2	2	2	3	2	0
O06534	0	0	0	0	0	0	0	0	0	0	0	0	0	0	0	0	0	0	0	0	0	0	0	0	0	0	0	0	0	0	0	0	0	0	0	0	0	0	0	0	0	0	0	0	0	0	0	0	0
O06536	9	23	15	16	14	0	19	15	11	15	9	33	18	5	6	0	23	0	0	2	3	0	13	14	6	3	9	2	1	8	8	6	1	9	3	0	1	1	6	5	0	0	2	2	0	0	6	8	0
O06537	0	0	0	0	0	0	0	0	0	0	0	0	0	0	0	0	0	0	0	0	0	0	0	0	0	0	0	0	0	0	0	0	0	0	0	0	0	0	0	0	0	0	0	0	0	0	0	0	0
O06538	1	7	2	1	1	0	2	1	1	1	1	2	1	4	4	0	1	0	0	1	6	0	4	2	4	1	1	3	0	3	3	4	0	4	3	0	1	0	3	2	1	0	4	4	2	0	6	8	0
O06539	1	4	1	2	2	0	1	1	1	1	1	3	2	1	1	0	1	0	0	1	0	0	1	0	2	0	1	2	0	0	0	0	0	0	0	0	0	0	1	0	0	0	1	0	0	0	2	0	0
O06540	0	7	0	0	0	0	0	0	0	0	0	0	0	1	1	0	0	0	0	0	1	0	0	0	0	0	0	0	0	0	0	0	0	0	0	2	1	0	1	1	0	0	1	2	1	0	0	0	0
O06541	8	17	16	16	13	0	18	12	9	15	7	31	14	5	5	0	23	0	0	1	2	0	12	13	6	3	9	2	1	8	8	6	1	9	3	0	1	1	5	4	0	0	2	2	0	0	8	8	0
O06542	9	20	16	16	13	0	19	15	10	15	8	32	15	6	6	0	23	0	0	1	3	0	13	14	6	3	10	2	1	8	8	6	1	9	3	0	1	1	5	5	0	0	2	2	1	0	8	8	0
O06543	2	0	3	2	6	0	3	3	2	2	1	3	2	0	0	0	3	0	0	0	0	0	8	3	0	0	5	0	0	1	0	1	0	2	0	1	2	0	1	1	0	0	0	0	0	0	4	2	0
O06544	36	77	47	51	47	1	72	54	33	36	25	67	57	7	8	2	56	1	1	6	26	4	29	31	25	9	39	3	9	16	16	61	6	22	10	3	5	1	20	19	2	2	20	25	3	4	35	32	0
O06545	3	1	4	4	3	0	9	2	2	5	5	9	7	3	4	0	4	0	0	0	8	0	12	10	10	2	8	2	2	10	9	11	7	14	12	7	1	1	14	10	2	2	7	5	5	9	5	4	0
O06546	2	0	3	2	3	0	5	2	3	3	4	7	5	4	2	0	3	0	0	0	8	0	8	9	8	2	4	2	2	9	8	8	7	13	12	7	1	1	12	9	1	2	7	5	4	8	5	3	0
O06547	0	4	5	0	1	0	3	0	0	2	1	8	6	3	3	1	2	0	1	1	2	0	0	0	0	0	2	0	0	0	1	0	0	1	3	1	2	0	2	4	0	0	2	3	0	0	1	2	0
O06550	0	0	0	0	0	0	0	0	0	0	0	0	1	0	0	0	0	0	0	0	1	0	14	19	6	4	10	3	4	10	8	38	1	4	2	19	7	0	3	1	0	0	3	2	0	1	29	30	0
O06551	1	4	2	1	2	0	5	1	1	2	2	3	2	2	0	1	2	5	3	2	4	0	1	1	0	0	0	0	1	0	0	0	0	1	0	0	0	0	1	0	0	0	2	0	0	0	0	1	0
O06552	0	0	0	0	0	0	0	0	0	0	0	0	0	0	0	0	0	0	0	0	0	0	0	0	1	0	0	0	0	0	0	1	0	0	0	1	1	0	1	0	0	0	0	0	0	0	1	1	0
O06553	0	0	0	0	0	0	0	0	0	0	0	0	0	0	0	0	0	0	0	0	0	0	1	0	1	2	0	0	0	2	1	0	0	0	0	0	3	0	2	1	0	0	1	2	0	0	2	1	0
O06554	0	4	1	1	1	0	1	1	0	1	1	1	1	1	1	0	1	1	1	0	1	0	1	0	0	1	0	0	1	0	0	1	0	0	2	0	0	0	0	0	0	0	1	1	1	0	2	2	0
O06555	0	0	0	0	0	0	0	0	0	0	0	0	0	0	0	0	0	0	0	0	0	0	0	0	0	0	0	0	0	0	0	0	0	0	0	0	0	0	0	0	0	0	0	0	0	0	0	0	0
O06556	0	0	0	0	0	0	0	0	0	0	0	0	0	0	0	0	0	0	0	0	0	0	0	0	0	0	0	0	0	0	0	0	0	0	0	0	0	0	0	0	0	0	0	0	0	0	0	0	0
O06557	0	0	0	1	0	0	0	0	0	0	1	0	1	0	0	0	0	0	0	0	0	0	0	0	1	0	0	0	0	0	0	0	0	0	0	0	0	0	1	0	0	0	0	0	0	0	1	3	0
O06558	0	0	0	0	0	0	0	0	0	0	0	0	0	0	0	0	0	0	0	0	1	1	1	1	2	2	1	1	1	1	1	2	1	1	1	1	0	0	2	2	0	0	1	1	0	0	1	1	0
O06559	0	0	0	0	0	0	0	0	0	0	0	0	0	0	0	0	0	0	0	0	3	0	5	3	5	4	7	6	9	7	4	6	0	3	9	6	5	0	11	9	0	0	2	2	3	4	4	6	0
O06560	0	0	0	0	0	0	0	0	0	0	0	0	0	0	0	0	0	0	0	0	1	0	2	0	9	3	3	4	5	9	4	0	1	1	9	8	5	0	13	13	1	1	2	2	3	2	1	1	0
O06561	0	0	0	0	0	0	0	0	0	0	0	0	0	0	0	0	0	0	0	0	0	0	1	0	0	1	1	0	0	0	0	0	0	1	1	0	0	0	1	1	0	0	0	0	0	0	0	1	0
O06562	0	0	0	0	0	0	0	0	0	0	0	0	0	0	0	0	0	0	0	0	0	0	1	0	0	1	1	0	0	0	0	0	0	1	1	0	0	0	1	1	0	0	0	0	0	0	0	1	0
O06563	14	28	27	17	20	3	32	24	11	15	12	32	18	17	18	14	31	13	14	12	8	6	7	7	8	6	8	8	8	8	7	8	6	6	8	10	8	5	10	11	5	5	7	7	5	7	7	8	4
O06565	0	0	0	0	0	0	0	0	0	0	0	0	0	0	0	0	0	0	0	0	0	0	0	0	0	0	0	0	0	0	0	0	0	0	0	0	0	0	0	0	0	0	0	0	0	0	0	0	0
O06566	0	0	0	0	0	0	0	0	0	0	0	0	0	0	0	0	0	0	0	0	0	0	0	0	0	0	0	0	0	0	0	0	0	0	0	0	0	0	0	0	0	0	0	0	0	0	0	0	0
O06567	0	0	0	0	0	0	0	0	0	0	0	0	0	0	0	0	0	0	0	0	0	0	2	0	1	4	0	1	1	2	2	0	0	0	0	2	1	0	0	0	0	0	0	0	0	1	1	1	0
O06568	0	0	0	0	0	0	0	0	0	0	0	0	0	0	0	0	0	0	0	0	0	0	0	0	0	0	0	0	0	0	0	0	0	0	0	0	0	0	0	0	0	0	0	0	0	0	0	0	0
O06569	0	0	0	0	2	0	2	0	0	2	2	3	1	1	1	0	1	0	0	0	1	0	0	2	2	0	2	1	2	2	3	5	1	1	1	0	0	0	0	0	0	0	0	0	0	1	3	5	0
O06570	0	0	0	0	0	0	0	0	0	0	0	0	0	0	0	0	0	0	0	0	0	0	0	0	0	0	0	0	0	0	0	0	0	1	0	0	0	0	0	0	0	0	0	0	0	0	0	0	0
O06571	0	0	0	0	0	0	0	0	0	0	0	0	0	0	0	0	0	0	0	0	0	0	0	0	0	0	0	0	0	0	0	0	0	0	0	0	0	0	0	0	0	0	0	0	0	0	0	0	0
O06572	20	0	23	41	17	2	49	46	17	19	19	36	25	1	2	4	33	2	2	1	7	1	2	1	4	0	1	0	0	0	0	3	0	2	0	0	0	0	0	1	0	0	6	5	0	1	1	1	0
O06574	5	16	3	3	5	0	9	3	3	3	2	5	4	3	3	1	6	1	1	2	4	2	3	4	5	3	11	2	4	3	1	10	1	3	1	4	0	0	5	3	0	0	2	3	2	1	8	11	0
O06575	14	84	20	10	12	3	34	18	9	16	14	33	16	18	19	1	25	1	1	6	24	3	15	15	16	4	12	2	5	12	13	25	1	22	11	3	4	1	18	21	1	1	21	26	2	1	25	22	0
O06576	16	97	24	11	17	3	34	37	12	22	14	40	20	19	18	1	28	1	1	3	23	3	17	16	16	4	10	2	5	11	9	27	2	21	8	4	4	1	14	19	2	2	21	25	1	2	20	18	0
O06577	0	11	0	0	0	0	0	0	0	0	0	0	3	0	1	0	0	0	0	0	0	0	0	1	1	1	0	0	0	1	1	0	0	2	0	0	0	0	1	1	0	0	0	0	0	0	0	0	0
O06578	0	0	0	0	0	0	0	0	0	0	0	0	0	0	0	0	0	0	0	0	0	0	0	0	0	0	0	0	0	0	0	0	0	0	0	0	0	0	0	0	0	0	0	0	0	0	1	0	0
O06579	0	5	0	1	0	0	0	0	0	0	0	0	0	8	6	0	0	0	0	0	4	0	1	1	2	1	1	0	0	1	1	1	1	1	2	3	2	0	2	2	1	1	4	5	1	0	2	6	0
O06580	0	0	0	0	0	0	0	0	0	0	0	0	0	0	0	0	0	0	0	0	0	0	0	0	0	0	0	0	0	0	0	0	0	0	0	0	0	0	0	0	0	0	0	0	0	0	9	8	0
O06581	0	0	1	0	0	0	0	0	0	0	0	0	0	0	0	0	0	0	0	0	2	3	3	4	11	2	6	1	2	6	4	10	1	1	0	14	11	0	8	6	2	1	4	3	0	2	7	8	0
O06582	0	0	1	0	2	0	2	0	0	1	1	1	0	1	1	0	1	0	0	1	0	0	2	0	1	1	2	0	0	1	1	1	0	1	1	0	0	0	0	0	0	0	0	0	0	0	2	1	0
O06583	0	0	0	0	0	0	0	0	0	0	0	0	0	0	0	0	0	0	0	0	0	0	0	0	0	0	0	0	0	0	0	0	0	0	0	0	0	0	0	0	0	0	0	0	0	0	0	0	0
O06585	14	19	11	7	16	3	15	12	10	7	10	10	10	5	9	0	11	0	0	2	14	2	10	9	10	3	11	1	4	8	8	14	1	8	2	2	5	1	9	4	2	1	19	26	1	1	7	7	0
O06586	5	7	5	5	6	3	9	7	3	4	4	4	11	9	13	1	3	0	0	1	5	2	5	7	4	3	2	2	2	5	5	9	3	3	3	2	2	2	4	2	2	2	14	16	2	2	4	3	0
O06587	0	27	0	0	0	0	0	0	0	0	0	0	0	1	1	0	0	0	0	0	1	1	1	1	2	1	1	1	1	3	3	2	1	1	1	1	1	1	3	3	1	1	1	1	1	1	3	3	0
O06589	3	10	1	4	3	0	3	5	2	1	4	1	4	5	6	3	2	0	1	7	6	1	6	5	5	6	6	5	5	4	4	5	6	6	8	7	1	0	5	5	1	1	9	8	5	7	7	5	0
O06592	0	0	0	0	0	0	0	0	0	0	0	0	0	0	0	0	0	0	0	0	0	0	0	0	0	0	0	0	0	0	0	0	0	0	0	0	0	0	0	0	0	0	0	0	0	0	0	0	0
O06593	12	72	27	20	17	2	38	17	11	23	17	43	33	33	29	6	31	3	5	9	57	1	13	13	20	3	14	9	5	11	10	22	4	15	18	12	11	3	31	22	5	4	29	31	8	4	13	22	0
O06594	0	5	1	0	0	0	0	0	0	1	1	1	3	1	1	0	2	0	0	1	2	1	1	1	1	2	2	0	1	1	1	1	1	1	2	2	1	0	2	2	1	1	2	2	2	2	2	3	0
O06597	4	13	13	9	11	0	24	8	4	13	5	23	8	7	7	0	14	0	1	1	8	2	6	7	3	3	5	4	4	9	10	9	5	6	3	4	4	2	6	4	0	0	5	6	2	3	9	11	1
O06598	0	0	0	0	0	0	0	0	0	0	1	0	0	0	0	0	0	0	0	0	1	0	0	4	3	0	1	0	0	0	1	1	0	0	0	0	1	0	0	1	0	0	0	0	0	0	2	0	0
O06603	0	0	0	0	0	0	0	0	0	0	0	0	0	0	0	0	0	0	0	0	0	0	0	0	0	2	0	0	0	0	0	0	0	0	0	0	0	0	13	5	0	0	0	0	0	0	9	8	0
O06604	0	0	0	0	0	0	0	0	0	0	0	0	0	0	0	0	0	0	0	0	4	2	6	3	4	0	10	0	0	0	3	3	0	0	0	11	2	2	5	2	0	0	2	2	0	0	6	7	0
O06605	0	0	0	0	0	0	0	0	0	0	0	0	0	0	0	0	0	0	0	0	0	0	0	0	0	0	0	0	0	0	0	0	0	0	0	0	0	0	0	0	0	0	0	0	0	0	0	0	0
O06606	0	0	0	0	0	0	0	0	0	0	0	0	0	0	0	0	0	0	0	0	0	0	0	0	0	0	0	0	0	0	0	0	0	0	0	0	0	0	0	0	0	0	0	0	0	0	0	0	0
O06607	0	0	0	0	0	0	0	0	0	0	0	0	0	0	0	0	0	0	0	0	0	0	0	0	0	0	0	0	0	0	0	0	0	0	0	0	0	0	0	0	0	0	0	0	0	0	0	0	0
O06608	0	0	1	0	5	0	0	0	0	2	1	6	0	2	0	0	3	0	0	0	0	0	0	0	1	0	0	1	0	0	0	0	0	0	0	0	0	0	1	0	0	0	1	2	0	0	0	0	0
O06609	0	0	0	0	0	0	0	0	0	0	0	0	0	0	0	0	0	0	0	0	0	0	0	0	0	0	0	0	0	0	0	0	0	0	0	0	0	0	0	0	0	0	0	0	0	0	0	0	0
O06610	0	0	0	0	0	0	0	0	0	0	0	0	0	0	0	0	0	0	0	0	0	0	0	0	0	0	0	0	0	0	0	0	0	0	0	0	0	0	0	0	0	0	0	0	0	0	0	0	0
O06611	0	0	0	0	0	0	0	0	0	0	0	0	0	0	0	0	0	0	0	0	0	0	0	0	0	0	0	0	0	0	0	0	0	0	0	0	0	0	0	0	0	0	0	0	0	0	0	0	0
O06612	0	0	0	0	0	0	0	0	0	0	0	0	0	0	0	0	0	0	0	0	0	0	1	0	0	0	0	1	1	0	0	0	0	0	0	1	0	0	0	0	0	0	0	0	0	0	0	0	0
O06613	0	0	0	0	0	0	0	0	0	0	0	0	0	0	0	0	0	0	0	0	0	1	0	0	0	0	0	1	1	0	0	1	0	0	0	1	0	0	1	0	1	1	0	0	0	0	0	0	0
O06614	0	0	0	0	0	0	0	0	0	0	0	0	0	0	0	0	0	0	0	0	0	1	1	0	1	0	0	1	1	0	0	1	0	0	2	2	0	0	0	0	1	1	0	0	0	0	0	0	0
O06615	0	0	0	0	0	0	0	0	0	0	0	0	0	0	0	0	0	0	0	0	0	0	0	0	0	0	0	0	0	0	0	0	0	0	0	0	0	0	0	0	0	0	0	0	0	0	0	0	0
O06616	0	0	0	0	0	0	0	0	0	0	0	0	0	0	0	0	0	0	0	0	0	0	0	0	0	0	0	0	0	0	0	0	0	0	0	0	0	0	0	0	0	0	0	0	0	0	0	0	0
O06617	0	0	0	0	0	0	0	0	0	0	0	0	0	0	0	0	0	0	0	0	0	0	0	0	0	0	0	0	0	0	0	0	0	0	0	0	0	0	0	0	0	0	0	0	0	0	0	0	0
O06618	0	0	0	0	0	0	0	0	0	0	0	0	0	0	0	0	0	0	0	0	0	0	0	0	0	0	0	0	0	0	0	0	0	0	0	0	0	0	0	0	0	0	0	0	0	0	0	0	0
O06619	0	3	0	0	0	0	0	0	0	0	0	0	0	0	0	0	0	0	0	0	1	1	0	0	0	0	0	0	0	0	0	1	0	0	0	0	0	0	0	0	0	0	0	0	0	0	1	1	0
O06620	0	0	0	0	0	0	0	0	0	0	0	0	0	0	0	0	0	0	0	0	0	0	0	0	0	1	0	0	0	0	0	0	0	0	0	0	0	0	1	1	0	0	0	0	0	0	1	0	0
O06623	0	0	0	0	0	0	0	0	0	0	0	0	0	0	0	0	0	0	0	0	0	0	0	0	0	0	0	0	0	0	0	0	0	0	0	0	0	0	0	0	0	0	0	0	0	0	0	0	0
O06624	0	0	0	0	0	0	0	0	0	0	0	0	0	0	0	0	0	0	0	0	1	0	2	0	1	5	0	2	2	2	2	2	0	1	0	4	1	0	1	0	0	0	1	1	0	1	4	4	0
O06625	22	0	3	61	0	0	0	23	6	0	2	2	3	2	2	0	2	0	0	0	3	0	4	1	4	2	4	0	2	1	2	6	6	3	0	0	1	0	3	1	0	0	1	2	0	2	3	7	0
O06627	0	0	0	0	0	0	0	0	0	0	0	0	0	0	0	0	0	0	0	0	0	0	0	0	0	1	0	0	0	0	0	0	0	0	0	0	0	0	0	0	0	0	0	0	0	0	1	1	0
O06628	1	0	1	0	1	0	2	2	1	1	1	3	2	0	0	0	3	0	0	0	0	0	0	1	0	0	0	0	0	0	0	0	0	0	0	0	0	0	0	0	0	0	0	0	0	0	1	1	0
O06629	10	44	12	21	6	1	14	9	5	9	15	19	20	6	7	0	10	1	1	2	8	0	2	3	8	1	4	2	3	3	3	8	6	2	2	5	4	1	9	14	0	0	9	6	3	2	2	4	0
O06630	1	10	2	1	0	0	2	1	1	1	1	1	1	3	5	0	2	0	1	1	4	1	0	0	6	2	0	0	0	1	1	0	1	0	2	8	2	1	2	3	0	0	6	7	1	0	3	2	0
O06632	0	5	0	1	2	0	1	0	1	2	0	1	4	1	0	0	1	0	0	1	11	3	8	5	9	3	6	2	2	12	9	16	3	2	4	9	14	2	1	2	0	0	9	9	2	1	11	13	0
O06633	0	0	0	0	0	0	0	0	0	0	0	0	0	0	0	0	0	0	0	0	1	0	0	0	0	0	0	0	0	0	0	1	0	0	0	0	0	0	3	4	0	0	0	0	0	0	5	10	0
O06634	0	2	1	1	1	1	3	0	0	1	1	2	1	2	2	1	1	1	1	2	0	2	0	0	0	0	0	0	0	0	0	0	3	0	3	4	4	2	0	0	0	0	0	0	0	0	1	1	1
O06769	2	3	2	0	1	0	1	2	1	3	1	1	0	0	0	0	1	0	0	0	2	0	0	0	0	0	0	0	0	0	0	0	0	0	0	0	0	0	1	1	0	0	0	0	0	0	1	0	0
O06773	0	0	0	0	0	0	0	0	0	0	0	0	0	0	0	0	0	0	0	0	0	0	0	0	0	0	0	0	0	0	0	0	0	0	0	0	0	0	0	0	0	0	0	0	0	0	0	0	0
O06774	0	0	0	0	0	0	0	0	0	0	0	0	0	0	0	0	0	0	0	0	0	0	0	0	0	0	0	0	0	0	0	0	0	0	0	0	0	0	0	0	0	0	0	0	0	0	0	0	0
O06775	0	0	0	0	0	0	0	0	0	0	0	0	0	0	0	0	0	0	0	0	0	0	0	0	0	0	0	0	0	0	0	0	0	0	0	0	0	0	0	0	0	0	0	0	0	0	0	0	0
O06776	7	0	21	4	22	0	35	12	6	17	38	24	19	0	0	0	22	0	0	0	0	0	1	1	0	0	1	1	0	1	1	1	10	2	0	0	0	0	0	2	0	0	0	2	0	1	2	4	0
O06777	0	0	0	0	0	0	0	0	0	0	0	0	0	0	0	0	0	0	0	0	0	0	0	0	0	0	0	0	0	0	0	0	0	0	0	0	0	0	0	0	0	0	0	0	0	0	0	0	0
O06778	0	0	0	0	0	0	0	0	0	0	0	0	0	0	0	0	0	0	0	0	0	0	0	0	0	0	0	0	0	0	0	0	0	0	0	0	0	0	0	0	0	0	0	0	0	0	0	0	0
O06779	0	0	0	0	0	0	0	0	0	0	0	0	0	0	0	0	0	0	0	0	0	0	0	0	0	0	0	0	0	0	0	0	0	0	0	0	0	0	0	0	0	0	0	0	0	0	0	0	0
O06780	0	0	0	0	0	0	0	0	0	0	0	0	0	0	0	0	0	0	0	0	0	0	0	0	0	0	0	0	0	0	0	0	0	0	0	0	0	0	0	0	0	0	0	0	0	0	0	0	0
O06781	0	0	0	0	0	0	0	0	0	0	0	0	0	0	0	0	0	0	0	0	0	0	0	0	0	0	0	0	0	0	0	0	0	0	0	0	0	0	0	0	0	0	0	0	0	0	0	0	0
O06782	0	0	0	0	0	0	0	0	0	0	0	0	0	0	0	0	0	0	0	0	0	0	0	0	0	0	0	0	0	0	0	0	0	0	0	0	0	0	0	0	0	0	0	0	0	0	0	0	0
O06783	0	0	0	0	0	0	0	0	0	0	0	0	0	0	0	0	0	0	0	0	0	0	0	0	0	0	0	0	0	0	0	0	0	0	0	0	0	0	0	0	0	0	0	0	0	0	0	0	0
O06785	1	9	3	4	6	0	13	2	1	3	0	3	5	6	6	0	5	0	0	0	5	0	0	0	0	0	0	0	0	0	0	0	0	0	0	0	0	0	0	0	0	0	3	4	0	0	0	0	0
O06787	0	0	0	0	0	0	0	0	0	0	0	0	0	0	0	0	0	0	0	0	0	0	0	0	0	0	0	0	0	0	0	0	0	0	0	0	0	0	0	0	0	0	0	0	0	0	0	0	0
O06789	2	3	1	0	0	0	2	5	3	1	1	1	2	0	0	0	1	0	0	0	0	0	0	0	0	1	0	0	0	0	0	4	1	0	0	0	0	0	0	0	0	0	0	0	0	0	5	3	0
O06790	0	0	0	0	0	0	0	0	0	0	0	0	0	0	0	0	0	0	0	0	0	0	0	0	1	0	0	0	0	0	0	0	0	0	0	0	0	0	0	1	0	0	0	0	0	0	0	0	0
O06793	0	0	0	0	0	0	0	0	0	0	0	0	0	0	0	0	0	0	0	0	0	0	0	0	0	0	0	0	0	0	0	0	0	0	0	0	0	0	0	0	0	0	0	0	0	0	0	0	0
O06795	2	13	0	0	0	1	0	1	1	0	0	0	4	1	1	0	0	0	0	0	0	0	0	1	1	1	0	0	0	1	1	0	0	2	0	0	0	0	1	1	0	0	0	0	0	0	0	0	0
O06796	0	0	0	0	0	0	0	0	0	0	0	0	0	0	0	0	0	0	0	0	0	0	0	0	0	0	0	0	0	0	0	0	0	0	0	0	0	0	0	0	0	0	0	0	0	0	0	0	0
O06797	0	0	0	0	0	0	0	0	0	0	0	0	0	0	0	0	0	0	0	0	0	0	0	1	0	0	0	0	0	0	0	0	0	0	0	1	0	0	0	0	0	0	0	0	0	0	1	0	0
O06798	0	0	0	0	0	0	0	0	0	0	0	0	0	0	0	0	0	0	0	0	0	0	0	0	0	0	0	0	0	0	0	0	0	0	0	0	0	0	14	16	0	0	0	0	0	0	7	8	0
O06799	0	0	0	0	0	0	0	0	0	0	0	0	0	0	0	0	0	0	0	0	0	2	0	1	0	2	2	0	0	1	1	1	1	1	1	4	2	0	1	0	0	0	1	1	0	1	3	3	0
O06800	0	0	0	0	0	0	0	0	0	0	0	0	0	0	0	0	0	0	0	0	0	0	0	0	1	1	1	2	0	1	0	0	0	0	1	0	1	0	0	0	0	0	0	0	0	0	0	0	0
O06802	0	0	0	0	1	0	2	0	0	0	2	0	3	0	0	0	0	0	0	1	0	0	1	0	2	0	0	1	0	0	0	3	0	2	1	1	0	0	1	1	0	0	1	1	0	0	3	2	0
O06803	5	3	1	6	1	0	1	10	2	1	2	4	8	0	1	0	2	0	0	2	1	0	0	0	8	0	0	0	0	2	2	0	1	0	0	1	0	0	0	1	0	0	0	0	1	0	0	0	0
O06804	2	48	7	7	6	0	5	3	3	4	4	10	7	5	4	0	7	0	0	4	4	1	8	1	2	2	4	2	2	3	2	5	1	3	4	4	0	0	6	6	0	0	5	5	1	2	5	5	0
O06805	0	0	0	0	0	0	0	0	0	0	0	0	0	0	0	0	0	0	0	0	0	0	0	0	0	0	0	0	0	0	0	0	0	0	0	0	0	0	0	0	0	0	0	0	0	0	0	0	0
O06806	0	0	0	0	0	0	0	0	0	0	0	0	0	0	0	0	0	0	0	0	0	0	10	8	0	2	3	1	2	0	0	8	0	0	1	3	0	0	0	0	0	0	0	0	2	0	21	24	0
O06807	0	0	0	0	0	0	0	0	0	0	0	0	0	0	0	0	0	0	0	0	0	0	0	1	0	2	0	1	1	1	1	1	0	0	0	3	2	0	0	0	0	0	0	0	0	0	12	8	0
O06809	3	4	3	5	2	1	2	3	3	2	1	4	6	3	2	2	3	2	2	2	3	0	3	2	2	2	2	1	0	2	2	2	0	2	2	0	0	0	2	2	2	2	3	4	2	1	1	1	0
O06811	1	8	6	3	1	0	3	5	0	3	1	4	3	2	2	1	3	1	1	2	3	1	3	5	3	2	6	3	5	3	3	4	2	3	4	2	3	0	3	5	1	1	4	4	2	3	11	8	0
O06812	1	2	2	3	2	0	3	1	0	1	1	1	1	2	2	0	1	0	0	2	4	0	1	1	2	1	1	1	2	2	1	1	0	1	1	1	1	0	1	2	1	1	2	2	1	1	1	1	0
O06813	0	0	0	0	0	0	0	0	0	0	0	0	0	0	0	0	0	0	0	0	1	0	0	0	0	1	0	0	0	0	0	0	0	0	0	0	0	0	0	0	0	0	1	1	0	0	1	1	0
O06815	0	0	0	0	0	0	0	0	0	0	0	0	0	0	0	0	0	0	0	0	0	0	0	0	0	0	0	0	0	0	0	0	0	0	0	0	0	0	0	0	0	0	0	0	0	0	0	0	0
O06816	0	0	0	0	0	0	0	0	0	0	0	0	0	0	0	0	0	0	0	0	0	0	0	0	0	0	0	0	0	0	0	0	0	0	0	0	0	0	0	1	0	0	1	1	0	0	1	1	0
O06817	1	2	1	2	1	0	1	2	1	1	1	1	2	1	1	0	1	0	0	0	3	0	6	4	6	5	9	6	9	8	5	7	1	3	9	6	5	0	12	11	1	1	2	2	3	4	4	6	0
O06820	0	0	0	0	0	0	0	0	0	0	0	0	0	0	0	0	0	0	0	0	0	0	0	0	0	0	0	0	0	0	0	0	0	0	0	0	0	0	0	0	0	0	0	0	0	0	0	0	0
O06823	0	0	0	0	0	0	0	0	0	0	0	0	0	0	0	0	0	0	0	0	0	0	0	0	0	0	0	0	0	0	0	0	0	0	0	0	0	0	0	0	0	0	0	0	0	0	0	0	0
O06824	0	0	0	0	0	0	0	0	0	0	0	0	0	0	0	0	0	0	0	0	0	0	0	0	0	0	0	0	0	0	0	0	0	0	0	0	0	0	0	0	0	0	0	0	0	0	0	0	0
O06825	0	0	0	0	0	0	0	0	0	0	0	0	0	0	0	0	0	0	0	0	2	0	0	2	2	1	0	0	0	3	3	5	7	1	2	4	1	0	2	0	0	0	3	3	0	0	1	2	0
O06826	3	21	12	4	10	0	12	2	1	8	3	15	6	9	10	0	9	0	0	1	9	1	3	3	6	3	3	0	1	3	2	6	1	1	3	1	1	0	6	8	1	0	12	10	5	1	6	10	0
O06827	0	0	0	0	0	0	0	0	0	0	0	0	0	0	0	0	0	0	0	0	0	0	0	0	0	0	0	0	0	0	0	0	0	0	0	0	0	0	0	0	0	0	0	0	0	0	0	0	0
O06829	0	0	0	0	0	0	0	0	0	0	0	0	0	0	0	0	0	0	0	0	0	0	0	1	0	2	0	1	1	1	1	1	0	0	0	3	2	0	0	0	0	0	0	0	0	0	12	8	0
O06830	7	12	16	11	14	2	12	7	5	12	5	19	9	6	5	1	21	1	1	2	5	1	3	4	5	2	3	1	1	4	3	2	3	7	2	2	1	1	10	10	1	1	7	7	2	3	4	5	1
O06831	23	56	37	34	28	4	47	45	18	30	12	75	47	12	15	6	48	4	4	9	15	0	18	14	9	5	13	3	2	14	16	12	2	12	13	0	0	1	15	15	0	0	15	23	3	3	17	20	0
O06832	54	38	44	62	49	2	68	79	39	34	18	83	34	4	5	1	112	0	1	2	8	1	8	8	20	6	7	0	7	4	5	12	2	8	3	0	1	0	6	5	0	1	2	3	0	0	10	10	0
O06934	7	22	6	6	7	1	10	9	2	5	4	14	11	6	8	0	10	0	1	2	5	0	4	5	5	3	6	0	1	2	3	6	2	3	2	0	0	0	3	3	0	1	10	8	3	1	5	8	0
O07033	0	0	0	0	0	0	0	0	0	0	0	0	0	0	0	0	0	0	0	0	0	0	0	0	0	0	0	0	0	0	0	0	0	0	0	0	0	0	0	0	0	0	0	0	0	0	0	0	0
O07034	0	0	0	0	0	0	0	0	0	0	0	0	0	0	0	0	0	0	0	0	0	0	0	0	0	0	0	0	0	0	0	0	0	0	0	0	0	0	0	0	0	0	0	0	0	0	0	0	0
O07036	0	0	0	0	0	0	0	0	0	0	0	0	0	0	0	0	0	0	0	0	0	0	0	0	0	0	0	0	0	0	0	0	0	0	0	0	0	0	0	0	0	0	0	0	0	0	0	0	0
O07166	2	10	5	1	3	1	3	3	1	4	3	6	2	12	11	3	4	1	1	4	2	2	5	5	1	2	3	6	4	6	7	3	3	3	3	2	4	1	7	7	2	2	4	3	1	3	2	2	1
O07169	22	56	37	32	31	4	53	45	19	29	13	82	48	12	15	6	48	4	4	9	15	0	18	13	9	5	12	3	2	13	16	12	2	12	12	0	0	1	13	14	0	0	15	23	3	3	16	19	0
O07170	14	28	30	20	20	5	33	24	11	15	13	32	18	18	17	18	29	12	14	12	9	6	6	7	8	6	8	8	8	8	8	9	6	7	8	11	8	5	10	11	5	6	7	7	6	8	8	9	4
O07171	0	0	0	0	0	0	0	0	0	0	0	0	0	0	0	0	0	0	0	0	0	0	0	0	0	2	0	0	0	0	0	0	0	0	0	0	0	0	0	0	0	0	0	0	0	1	0	1	0
O07172	0	0	0	0	0	0	0	0	0	0	0	0	0	0	0	0	0	0	0	0	0	0	0	0	0	0	0	0	0	0	0	0	0	0	0	0	0	0	0	0	0	0	0	0	0	0	0	0	0
O07173	0	0	0	0	0	0	0	0	0	0	0	0	0	0	0	0	0	0	0	0	0	0	0	0	0	0	0	0	0	0	0	0	0	0	0	0	0	0	0	0	0	0	0	0	0	0	0	0	0
O07175	3	16	16	0	12	0	77	5	2	13	4	37	2	7	7	1	33	1	1	1	17	1	5	2	10	6	4	4	3	2	2	4	8	4	6	4	3	3	11	11	2	1	7	8	3	1	6	6	0
O07176	16	7	5	6	2	1	9	17	7	3	4	4	4	7	7	0	4	0	0	7	6	8	6	0	9	6	3	2	4	9	8	7	3	0	1	2	0	0	8	6	0	0	8	6	1	0	11	16	0
O07177	0	0	0	0	0	0	0	0	0	0	0	0	0	0	0	0	0	0	0	0	0	0	1	0	1	1	1	0	0	0	0	0	0	0	0	0	0	0	0	1	0	0	0	0	0	0	1	1	0
O07178	9	28	16	11	17	1	34	15	5	13	8	33	9	4	3	1	24	1	1	2	11	0	5	4	23	7	7	1	1	3	4	11	1	4	3	0	1	0	5	5	1	1	4	7	1	0	11	7	0
O07179	9	24	16	16	16	0	21	18	12	15	9	35	18	6	6	2	24	0	0	3	4	0	13	14	6	3	10	2	1	8	8	6	1	9	4	0	1	1	6	5	0	0	2	2	1	0	8	8	0
O07180	0	0	0	0	0	0	0	0	0	0	0	0	1	0	0	0	0	0	0	0	1	0	0	2	2	1	0	2	1	1	1	0	0	1	0	0	0	0	0	0	0	0	1	1	0	0	0	1	0
O07181	0	0	0	0	0	0	0	0	0	0	0	0	0	0	0	0	0	0	0	0	1	0	0	0	0	0	0	0	0	0	0	0	0	0	0	1	0	0	1	1	0	0	0	0	1	0	0	0	0
O07182	0	0	0	0	0	0	0	0	0	0	0	0	0	0	0	0	0	0	0	0	3	0	1	0	4	1	14	0	0	0	3	1	0	0	0	2	0	8	0	0	0	0	1	0	0	0	1	4	0
O07183	4	11	6	8	5	1	6	8	4	5	5	14	8	6	6	5	6	3	2	1	2	0	1	3	0	2	3	2	2	2	2	3	2	2	1	1	0	1	1	1	2	2	3	3	1	1	1	1	0
O07185	4	17	14	11	18	0	26	18	4	10	11	26	8	6	6	1	14	0	0	6	13	0	6	4	5	4	7	2	1	7	6	6	1	6	14	8	4	0	17	21	1	1	13	14	5	4	2	1	0
O07187	4	8	7	4	6	0	15	16	4	6	2	12	4	6	6	0	10	0	0	3	1	1	2	0	1	1	3	7	6	6	6	2	4	3	2	2	1	2	2	3	0	0	1	2	1	3	2	3	0
O07188	0	0	0	0	0	0	0	0	0	0	0	0	0	0	0	0	0	0	0	0	0	1	0	0	0	0	0	0	0	0	0	0	0	0	0	2	0	0	0	0	0	0	0	0	0	0	0	0	0
O07189	0	0	0	0	0	0	0	0	0	0	0	0	0	0	0	0	0	0	0	0	0	1	0	0	0	0	0	0	0	0	0	0	0	0	0	3	0	0	0	0	0	0	0	0	0	0	0	0	0
O07190	12	16	17	4	14	0	14	15	4	12	6	30	9	1	2	0	34	0	0	0	23	12	23	16	22	18	22	14	16	25	23	78	13	5	10	43	26	5	24	27	1	1	34	34	6	6	36	30	4
O07191	1	4	1	1	2	1	2	2	1	2	2	7	1	6	6	3	4	0	0	1	1	4	1	3	1	1	1	3	4	3	3	1	1	1	1	2	2	1	1	1	0	0	1	1	2	1	1	1	0
O07192	14	18	34	15	17	0	35	20	9	13	1	27	14	1	1	0	25	0	0	8	2	0	2	21	18	4	3	2	1	5	5	2	2	1	0	1	2	0	0	3	0	0	1	2	0	0	32	24	0
O07194	0	1	0	0	0	0	0	0	0	0	0	0	0	0	1	0	0	0	0	0	6	1	4	4	2	3	2	2	3	7	5	3	4	4	2	4	3	2	3	3	0	0	7	7	5	2	4	4	0
O07195	0	0	0	0	0	0	0	0	0	0	0	0	0	0	0	0	0	0	0	0	0	0	0	0	0	0	0	0	0	0	0	0	0	0	0	0	0	0	0	0	0	0	0	0	0	0	1	1	0
O07196	0	0	0	0	0	0	0	0	0	0	0	0	0	0	0	0	0	0	0	0	0	0	0	0	0	2	0	0	0	0	0	0	0	0	0	0	0	0	0	0	0	0	0	0	0	0	0	1	0
O07197	0	0	0	0	0	0	0	0	0	0	0	0	0	0	0	0	0	0	0	0	0	0	0	0	0	0	0	0	0	0	0	0	0	0	0	0	0	0	0	0	0	0	0	0	0	0	0	0	0
O07198	0	0	0	0	0	0	0	0	0	0	0	0	0	0	0	0	0	0	0	0	0	0	0	0	0	1	0	0	0	0	0	0	0	0	0	0	0	0	0	0	0	0	0	0	0	0	1	1	0
O07200	0	0	0	0	0	0	0	0	0	0	0	0	0	0	0	0	0	0	0	0	0	0	0	0	0	1	0	0	0	0	0	0	0	0	0	0	0	0	0	0	0	0	0	0	0	0	2	1	0
O07201	0	0	0	0	0	0	0	0	0	0	0	0	0	0	0	0	0	0	0	0	0	0	0	0	0	1	0	0	0	0	0	0	0	0	0	0	0	0	0	0	0	0	0	0	0	0	4	5	0
O07202	0	0	0	0	0	0	0	0	0	0	0	0	0	0	0	0	0	0	0	0	0	0	0	0	0	2	0	0	0	0	0	0	0	0	0	0	0	0	0	0	0	0	0	0	0	0	2	2	0
O07205	2	1	3	1	2	0	2	2	2	1	1	1	2	3	5	0	1	0	0	3	4	0	6	4	5	1	3	3	2	4	3	6	3	1	1	2	2	0	2	1	0	0	2	3	1	1	8	2	0
O07206	0	1	0	0	0	0	0	0	0	0	1	0	0	0	0	0	0	0	0	0	1	0	0	0	0	0	0	0	0	0	0	1	0	0	0	0	0	0	0	0	0	0	1	1	0	0	0	0	0
O07207	0	0	0	0	0	0	0	0	0	0	0	0	0	0	0	0	0	0	0	0	0	0	0	0	0	0	0	0	0	0	0	0	0	0	0	0	0	0	0	0	0	0	0	0	0	0	0	0	0
O07208	0	0	0	0	0	0	0	0	0	0	0	0	0	0	0	0	0	0	0	0	1	0	2	0	2	2	1	1	0	1	1	1	0	1	1	1	0	1	2	2	1	1	2	2	0	0	1	1	0
O07209	0	0	0	0	0	0	0	0	0	0	0	0	0	0	0	0	0	0	0	0	0	0	0	0	0	1	0	0	0	0	0	0	0	0	0	0	0	0	0	0	0	0	0	0	0	0	1	1	0
O07210	0	0	0	0	0	0	0	0	0	0	0	0	0	0	0	0	0	0	0	0	0	0	0	0	0	1	0	0	0	0	0	0	0	0	0	0	0	0	0	0	0	0	0	0	0	0	1	1	0
O07211	0	0	0	0	0	0	0	0	0	0	0	0	0	0	0	0	0	0	0	0	0	0	0	0	0	0	0	0	0	0	0	0	0	0	0	0	0	0	0	0	0	0	0	0	0	0	2	2	0
O07213	0	0	0	0	0	0	0	0	0	0	0	0	0	0	0	0	0	0	0	0	0	0	0	0	0	2	0	0	0	0	0	0	0	0	0	0	0	0	0	0	0	0	0	0	0	0	2	2	0
O07216	1	1	2	8	1	0	1	0	0	1	0	1	1	0	0	0	1	0	0	0	0	0	0	0	0	0	0	0	0	0	0	0	0	0	0	0	0	0	0	0	0	0	0	0	0	0	1	1	0
O07218	0	0	0	0	0	0	0	0	0	0	0	0	0	0	0	0	0	0	0	0	0	0	0	0	0	1	0	0	0	0	0	0	0	0	0	0	0	0	0	0	0	0	0	0	0	0	1	1	0
O07219	0	0	0	0	0	0	0	0	0	0	0	0	0	0	0	0	0	0	0	0	0	0	0	0	0	0	0	0	0	0	0	0	0	0	0	0	0	0	0	0	0	0	0	0	0	0	2	1	0
O07220	5	25	11	9	9	1	13	9	6	8	9	18	12	9	9	4	16	3	3	6	10	4	4	11	5	9	7	4	3	9	8	8	1	12	11	2	5	1	8	9	2	2	12	14	7	2	14	14	2
O07221	0	0	0	0	0	0	0	0	0	0	0	0	0	0	0	0	0	0	0	0	2	1	2	2	1	0	1	0	1	2	3	2	0	0	0	6	2	0	2	2	0	0	1	2	2	0	0	0	0
O07222	0	0	0	0	0	0	0	0	0	0	0	0	0	0	0	0	0	0	0	0	0	0	0	0	0	0	0	0	0	0	0	0	0	0	0	0	0	0	0	0	0	0	0	0	0	0	0	0	0
O07225	0	0	0	0	0	0	0	0	0	0	0	0	0	0	0	0	0	0	0	0	0	0	0	0	0	0	0	0	0	0	0	0	0	0	0	0	0	0	0	0	0	0	0	0	0	0	0	0	0
O07226	0	0	0	0	0	0	0	0	0	0	0	0	0	0	0	0	0	0	0	0	0	0	0	0	0	0	0	0	0	0	0	0	0	0	0	0	0	0	0	0	0	0	0	0	0	0	0	0	0
O07227	0	0	0	0	0	0	0	0	0	0	0	0	0	0	0	0	0	0	0	0	0	0	0	0	0	0	0	0	0	0	0	0	0	0	0	0	0	0	0	0	0	0	0	0	0	0	0	0	0
O07228	0	0	0	0	0	0	0	0	0	0	0	0	0	0	0	0	0	0	0	0	1	0	0	0	1	0	1	1	0	0	0	1	0	0	0	0	0	0	0	0	0	0	5	1	0	0	0	0	0
O07229	0	0	0	0	0	0	0	0	0	0	0	0	1	0	0	0	0	0	0	0	30	2	13	43	14	7	6	6	4	17	16	29	2	21	7	17	7	0	14	13	0	0	11	11	5	3	27	29	0
O07230	46	103	70	77	70	3	133	65	40	51	35	86	67	24	22	2	77	2	2	14	30	4	23	29	24	6	32	3	8	15	16	61	5	23	9	4	5	1	20	20	2	2	22	26	2	3	35	35	0
O07233	1	0	1	1	1	0	1	2	1	1	0	1	2	0	0	1	1	0	0	0	3	1	2	4	0	1	1	5	4	2	2	6	4	3	1	9	5	0	1	1	0	0	2	4	0	1	1	1	1
O07234	0	0	0	0	0	0	0	0	0	0	0	0	0	0	0	0	0	0	0	0	0	0	0	0	0	0	0	0	0	0	0	0	0	0	0	0	0	0	0	0	0	0	0	0	0	0	0	0	0
O07235	5	10	14	9	10	0	24	12	7	12	3	20	11	1	1	0	18	0	0	2	1	1	2	3	2	2	0	1	1	2	3	1	0	1	0	0	1	2	5	4	0	0	2	2	1	0	3	5	0
O07236	0	0	0	0	0	0	0	0	0	0	0	0	0	0	0	0	0	0	0	0	0	0	1	0	1	1	1	0	0	0	0	1	1	0	1	0	0	0	0	0	0	0	0	0	0	0	0	0	0
O07237	0	0	0	0	0	0	0	0	0	0	0	0	0	0	0	0	0	0	0	0	2	0	1	2	0	0	0	0	1	0	0	0	0	0	0	0	0	0	1	1	0	0	0	0	0	0	0	0	0
O07238	0	0	0	0	0	0	0	0	0	0	0	0	0	0	0	0	0	0	0	0	0	0	0	0	0	0	0	0	0	0	0	0	0	0	0	0	0	0	0	0	0	0	0	0	0	0	0	0	0
O07239	7	23	21	12	15	5	34	16	9	14	10	27	11	7	7	5	31	5	5	14	5	1	7	3	3	2	2	3	3	4	5	2	2	2	2	4	4	1	14	13	3	3	6	7	2	1	3	1	1
O07240	0	0	0	0	0	0	0	0	0	0	0	0	0	0	0	0	0	0	0	0	0	0	0	0	0	0	0	0	0	0	0	0	0	0	0	0	0	0	0	0	0	0	0	0	0	0	0	0	0
O07241	0	0	0	0	0	0	0	0	0	0	0	0	0	0	0	0	0	0	0	0	0	0	0	0	0	0	0	0	0	0	0	0	0	0	0	0	0	0	0	0	0	0	0	0	0	0	0	0	0
O07242	7	33	0	0	0	0	0	3	3	0	2	0	0	1	1	0	0	0	0	5	1	3	0	0	2	1	0	0	0	0	0	2	3	0	0	0	0	0	1	1	0	0	0	0	0	0	1	0	0
O07243	0	0	0	0	0	0	0	0	0	0	0	0	0	0	0	0	0	0	0	0	0	0	1	1	0	0	0	0	0	0	0	0	0	0	0	0	0	0	0	0	0	0	0	0	0	0	0	1	0
O07244	1	14	10	8	9	2	12	11	6	7	0	12	6	2	3	1	10	1	1	2	3	1	2	2	1	0	1	1	1	2	2	6	0	2	1	3	0	0	2	2	0	0	2	2	0	0	2	3	0
O07246	0	0	0	0	0	0	0	0	0	0	0	0	0	0	0	0	0	0	0	0	0	0	0	0	0	0	0	0	0	0	0	0	0	0	0	0	0	0	0	0	0	0	0	0	0	0	0	0	0
O07247	1	1	25	1	9	2	2	2	1	2	1	3	3	1	1	1	3	1	1	1	2	1	2	2	2	2	2	2	2	2	2	2	0	2	2	2	0	1	1	1	2	2	1	1	2	0	2	2	1
O07248	2	5	1	1	2	1	3	1	1	1	1	3	2	4	2	0	1	0	0	0	3	1	2	2	5	2	3	1	2	3	1	2	1	4	2	5	1	0	5	3	0	0	1	1	2	2	5	5	1
O07249	1	4	1	0	1	0	1	3	1	1	0	1	2	1	1	1	1	1	1	1	0	1	0	1	4	4	0	0	0	0	0	2	0	0	0	0	0	0	1	0	0	0	0	1	0	0	4	3	0
O07250	0	0	0	0	0	0	0	0	0	0	0	0	0	0	0	0	0	0	0	0	0	0	0	0	0	0	0	0	0	0	0	0	0	0	0	0	0	0	0	0	0	0	0	0	0	0	0	0	0
O07251	8	34	17	10	14	1	19	6	4	9	9	26	16	21	24	2	16	2	3	2	28	1	4	2	11	2	5	3	2	2	3	7	2	4	12	6	7	1	7	9	3	1	17	17	4	2	4	7	0
O07252	0	0	0	0	0	0	0	0	0	0	0	0	1	0	0	0	0	0	0	0	30	2	11	44	13	5	5	5	4	16	15	28	2	21	7	17	7	0	13	13	0	0	10	11	5	4	24	27	0
O07253	9	42	25	16	16	2	27	11	10	15	14	30	28	31	33	2	25	3	4	7	47	1	15	8	19	4	20	7	5	10	9	17	4	14	17	8	9	1	27	22	5	5	28	29	8	4	7	17	0
O07254	0	0	0	0	0	0	0	0	0	0	0	0	1	0	0	0	0	0	0	0	30	2	11	41	12	5	4	4	3	15	15	28	2	17	6	17	6	0	12	13	0	0	10	11	5	0	22	22	0
O07255	3	26	7	7	7	1	12	9	4	5	8	11	12	7	7	3	13	2	3	4	10	4	8	9	5	10	7	5	3	8	7	9	2	13	13	3	6	1	8	10	2	0	9	13	8	2	13	15	2
O07256	0	0	0	0	0	0	0	0	0	0	0	0	0	0	0	0	0	0	0	0	0	0	0	0	0	1	0	0	0	0	0	0	0	0	0	0	0	0	0	0	0	0	0	0	0	0	0	1	0
O07257	0	0	0	0	0	0	0	0	0	0	0	0	0	0	0	1	0	0	0	0	2	1	0	1	0	1	1	2	1	1	1	3	1	1	3	2	1	1	1	1	1	1	3	4	2	1	3	2	1
O07406	3	24	8	7	6	0	8	3	3	4	4	10	7	5	4	0	7	0	0	4	3	1	8	2	2	1	4	2	2	3	2	5	1	2	4	5	0	0	6	6	0	0	5	5	1	2	4	5	0
O07408	1	8	2	0	0	0	2	2	1	1	1	2	2	3	3	0	2	0	0	0	2	1	4	6	2	1	2	2	2	5	5	4	2	7	2	1	0	0	4	3	0	0	3	3	1	2	4	3	0
O07411	23	56	38	35	30	4	52	46	19	30	12	79	47	12	14	6	48	4	4	9	15	0	18	14	9	5	13	3	2	14	16	12	2	12	12	0	0	1	15	15	0	0	15	23	3	3	17	20	0
O07412	0	1	0	0	0	0	0	0	0	0	0	0	0	1	1	0	0	0	0	0	1	0	3	1	1	0	2	1	1	1	1	1	1	0	2	0	0	1	2	1	1	1	1	1	2	1	0	0	0
O07413	0	1	0	0	0	0	0	0	0	0	0	0	0	1	1	0	0	0	0	0	1	0	3	1	1	0	2	1	1	1	1	1	1	0	2	0	0	1	2	1	1	1	1	1	2	1	0	0	0
O07414	0	2	0	0	0	0	0	0	0	0	0	0	0	1	1	0	0	0	0	0	1	0	3	2	1	0	3	2	2	3	2	1	1	2	2	0	0	1	2	1	1	1	1	1	2	1	0	0	0
O07415	0	3	0	0	0	0	0	0	1	0	0	0	1	2	1	0	0	1	0	0	2	0	4	2	1	0	3	1	1	2	2	1	1	2	2	0	0	1	2	1	1	1	1	1	2	1	0	0	0
O07416	1	4	2	1	1	0	4	1	2	2	4	6	1	1	1	0	7	0	0	0	1	0	3	2	1	0	2	1	1	2	2	1	1	2	2	0	0	1	2	1	1	1	1	1	2	1	0	0	0
O07417	0	2	1	0	0	0	0	0	0	1	0	0	0	1	1	0	0	1	0	0	1	0	3	2	1	0	3	1	1	2	2	1	1	2	2	0	0	1	2	1	1	1	1	1	2	1	0	0	0
O07418	2	2	8	1	4	0	12	3	2	7	4	15	5	1	1	0	12	0	2	1	1	0	3	2	1	0	2	1	1	2	2	1	1	2	2	0	0	1	2	2	1	1	1	1	2	1	1	0	0
O07419	0	0	0	0	0	0	0	0	0	0	0	0	0	0	0	0	0	0	0	0	0	0	0	0	0	0	0	0	0	0	0	0	0	0	0	0	0	0	0	0	0	0	0	0	0	0	0	0	0
O07420	0	0	1	0	1	0	2	0	0	1	0	2	1	0	0	0	3	0	0	0	1	1	2	2	1	1	1	0	0	1	1	1	0	2	2	1	0	0	1	1	1	1	2	2	0	2	3	2	0
O07421	0	0	0	0	0	0	0	0	0	0	0	0	0	0	0	0	0	0	0	0	0	0	0	0	0	0	0	0	0	0	0	0	0	0	0	0	0	0	0	0	0	0	0	0	0	0	0	0	0
O07422	0	0	0	0	0	0	0	0	0	0	0	0	0	0	0	0	0	0	0	0	0	0	0	0	0	0	0	0	0	0	0	0	0	0	0	0	0	0	0	0	0	0	0	0	0	0	0	0	0
O07423	0	0	0	0	0	0	0	0	0	0	0	0	0	0	0	0	0	0	0	0	0	0	0	0	0	0	0	0	0	0	0	0	0	0	0	0	0	0	0	0	0	0	0	0	0	0	0	0	0
O07424	3	2	0	0	0	0	3	7	2	0	0	0	1	0	0	0	0	0	0	2	4	1	3	4	4	3	3	3	3	5	5	3	2	3	3	5	2	1	7	3	0	0	5	3	0	2	6	4	0
O07426	0	1	0	0	0	0	0	0	0	0	0	0	0	0	0	0	0	0	0	0	7	2	6	2	29	12	3	2	2	4	4	12	4	2	2	16	14	0	21	22	0	0	4	3	1	7	17	10	0
O07427	25	127	32	21	21	6	38	42	15	32	13	53	24	24	20	13	31	4	6	12	35	3	19	21	25	6	15	2	10	16	16	31	0	26	15	4	4	1	15	24	3	4	24	29	2	4	24	27	0
O07428	0	0	0	0	0	0	0	0	0	0	0	0	0	0	0	0	0	0	0	0	0	0	1	0	0	0	0	0	0	0	0	0	0	0	0	0	0	0	0	0	0	0	0	0	0	0	0	0	0
O07429	0	0	0	0	0	0	0	0	0	0	0	0	0	0	0	0	0	0	0	0	0	0	0	0	0	0	0	0	0	0	0	0	0	0	0	0	0	0	0	0	0	0	0	0	0	0	0	0	0
O07430	0	19	0	0	3	0	0	0	0	0	12	0	0	0	0	0	0	0	0	0	1	3	1	1	8	3	2	1	1	1	1	1	1	1	1	1	1	1	1	3	0	0	1	1	0	1	6	4	0
O07431	6	42	13	17	14	2	14	7	6	10	13	12	15	24	20	1	13	2	2	2	22	1	9	6	14	5	8	7	3	10	11	11	2	9	12	9	7	4	10	16	1	2	15	19	6	2	7	10	1
O07432	0	0	0	0	0	0	0	0	0	0	0	0	0	0	0	0	0	0	0	0	0	0	0	0	0	0	0	0	0	0	0	0	0	0	0	0	0	0	0	0	0	0	0	0	0	0	0	0	0
O07434	0	0	0	0	0	0	0	0	0	0	0	0	0	0	0	0	0	0	0	0	0	2	0	1	0	2	2	0	0	1	1	1	1	1	1	4	2	0	1	0	0	0	1	1	0	2	3	3	0
O07435	68	91	66	74	59	0	115	93	47	58	16	88	65	17	15	2	79	3	2	37	3	0	30	47	16	12	33	6	9	23	18	32	6	7	6	5	0	0	14	12	2	1	2	5	2	7	64	64	0
O07436	0	0	0	0	0	0	0	0	0	0	0	0	0	0	0	0	0	0	0	0	2	0	1	2	2	1	0	0	0	4	4	9	7	1	3	4	1	0	2	0	0	0	3	3	0	0	1	2	0
O07437	0	0	0	0	0	0	0	0	0	0	0	0	0	0	0	0	0	0	0	0	0	0	0	0	0	0	0	0	0	0	0	0	0	0	0	0	0	0	0	0	0	0	0	0	0	0	0	0	0
O07438	3	5	6	2	4	1	16	7	3	3	1	9	2	3	2	1	3	1	1	2	2	2	3	2	3	2	2	2	2	3	1	3	2	2	2	3	3	1	3	3	2	1	3	3	2	2	2	1	2
O07717	0	1	0	2	0	0	0	0	0	0	0	0	1	0	0	0	0	0	0	2	0	0	1	1	1	0	2	0	0	1	1	1	0	1	1	0	0	0	2	2	0	0	0	0	0	0	1	1	0
O07718	0	9	0	2	0	0	0	0	0	0	1	0	2	1	0	0	0	0	0	2	0	0	2	2	2	1	3	0	0	2	2	1	0	2	2	0	0	0	3	2	0	0	1	1	0	1	5	4	0
O07719	0	0	0	0	0	0	0	0	0	0	0	0	0	0	0	0	0	0	0	0	0	0	0	0	0	0	0	0	0	0	0	0	0	0	0	0	0	0	0	0	0	0	0	0	0	0	0	0	0
O07720	3	12	5	8	6	0	5	8	3	5	3	11	10	5	3	0	8	0	0	2	5	2	8	7	10	3	8	2	5	4	4	11	4	8	4	8	4	1	8	8	1	0	8	9	4	3	9	6	0
O07721	15	37	26	15	26	4	34	17	5	19	12	30	11	10	11	1	22	0	0	17	13	0	8	11	13	6	13	2	5	6	5	23	2	7	6	3	1	0	14	17	1	1	12	11	1	2	17	19	0
O07725	0	0	0	0	0	0	0	0	0	0	0	0	0	0	0	0	0	0	0	0	0	0	0	0	1	0	0	0	0	0	0	0	0	1	0	0	0	0	0	1	0	0	0	0	0	0	0	0	0
O07726	0	0	0	0	0	0	0	0	0	0	0	0	0	0	0	0	0	0	0	0	0	0	0	0	0	0	0	0	0	0	0	0	0	0	0	0	0	0	0	0	0	0	0	0	0	0	1	0	0
O07727	6	4	5	7	7	0	13	9	5	6	5	11	11	3	3	0	10	1	1	0	2	0	13	9	6	2	4	1	1	5	4	18	1	3	2	1	2	1	3	3	1	1	3	3	1	1	10	6	0
O07728	0	4	2	3	3	0	2	0	0	0	0	3	0	0	0	0	3	0	0	0	8	0	1	1	8	2	0	0	1	2	2	0	1	0	4	2	2	0	0	1	0	0	9	7	0	0	2	1	0
O07729	0	0	0	0	0	0	0	0	0	0	0	0	0	0	0	0	0	0	0	0	1	0	1	0	1	0	0	0	0	0	0	0	0	0	0	1	1	0	0	0	0	0	2	2	0	0	1	1	0
O07730	82	111	77	112	70	1	118	147	72	62	16	112	88	23	17	2	93	3	3	52	4	0	30	41	16	12	29	7	11	26	20	28	5	5	5	7	1	1	16	13	5	4	3	5	2	8	61	59	0
O07732	30	100	47	44	35	4	86	68	23	39	24	76	33	21	20	3	67	2	2	6	30	3	21	16	20	5	14	2	5	11	10	30	2	21	12	3	4	1	17	22	3	4	29	32	2	4	27	25	0
O07733	1	3	6	1	8	0	15	1	1	8	1	15	5	1	1	2	10	0	0	0	3	0	1	0	1	1	0	0	0	0	0	0	0	0	2	0	0	0	1	1	0	0	0	0	1	0	1	0	0
O07736	1	5	2	1	2	0	5	1	1	2	2	3	2	3	1	1	2	4	2	2	5	0	1	1	0	0	0	0	1	0	0	0	0	1	0	0	0	0	1	0	0	0	2	0	0	0	0	1	0
O07737	15	45	26	15	24	2	33	17	5	18	11	30	13	9	9	1	23	0	0	16	14	0	7	11	14	7	11	2	6	6	5	25	3	7	6	6	2	0	14	19	1	1	13	12	1	3	21	25	0
O07738	0	2	0	0	0	0	0	0	0	0	1	0	1	1	1	0	0	0	0	1	1	1	2	3	1	0	3	1	2	1	1	1	0	2	0	2	2	0	1	1	1	1	1	1	1	1	1	1	0
O07739	0	0	0	0	0	0	0	0	0	0	0	0	0	0	0	0	0	0	0	0	0	0	0	0	0	0	0	0	0	0	0	0	0	0	0	0	0	0	0	0	0	0	0	0	0	0	0	0	0
O07740	0	0	0	0	0	0	0	0	0	0	0	0	0	0	0	0	0	0	0	0	0	0	0	0	0	0	0	0	0	0	0	0	0	0	0	0	0	0	0	0	0	0	0	0	0	0	0	0	0
O07741	0	0	0	0	0	0	0	0	0	0	0	0	0	0	0	0	0	0	0	0	0	0	0	0	0	0	0	0	0	0	0	0	0	0	0	0	0	0	0	0	0	0	0	0	0	0	0	0	0
O07742	0	0	0	0	0	0	0	0	0	0	0	0	0	0	0	0	0	0	0	0	0	0	2	1	3	1	2	0	0	1	1	1	0	1	1	0	0	0	3	4	0	0	0	0	0	4	1	2	0
O07743	0	2	0	0	0	0	0	0	0	0	0	0	0	1	0	0	0	0	0	0	2	0	0	0	0	0	0	0	0	0	0	0	0	0	0	0	0	0	1	0	0	0	1	0	0	0	0	1	0
O07744	0	0	0	0	0	0	0	0	0	0	0	0	0	0	0	0	0	0	0	0	0	0	0	0	0	0	0	0	0	0	0	0	0	0	0	0	0	0	0	0	0	0	0	0	0	0	0	1	0
O07745	0	0	0	0	0	0	0	0	0	0	0	0	0	0	0	0	0	0	0	0	0	0	0	0	0	0	0	0	0	0	0	0	0	0	0	0	0	0	0	0	0	0	0	0	0	0	0	0	0
O07746	0	0	0	0	0	0	0	0	0	0	0	0	0	0	0	0	0	0	0	0	0	1	1	2	0	0	0	2	2	2	2	1	1	1	1	1	0	0	0	1	0	0	0	0	1	1	1	1	0
O07747	0	0	0	0	0	0	0	0	0	0	0	0	0	0	0	0	0	0	0	0	0	0	0	0	0	2	0	0	0	0	0	0	0	0	0	0	0	0	0	0	0	0	0	0	0	0	1	2	0
O07748	0	0	0	0	0	0	0	0	0	0	0	0	0	0	0	0	0	0	0	0	4	0	1	1	3	0	0	0	0	0	0	1	0	0	0	0	0	1	3	5	0	0	2	2	0	0	5	7	0
O07749	39	87	64	52	60	2	113	63	34	47	27	75	69	8	7	1	66	0	0	9	29	4	26	31	26	6	38	3	9	17	17	61	5	24	8	3	5	1	19	19	2	2	19	26	1	4	36	33	0
O07750	0	0	0	0	0	0	0	0	0	0	0	0	0	0	0	0	0	0	0	0	0	0	0	0	0	0	0	0	0	0	0	0	0	0	0	0	0	0	0	0	0	0	0	0	0	0	0	0	0
O07751	0	2	0	0	0	0	0	0	0	0	0	0	0	0	0	0	0	0	0	0	0	0	0	0	1	0	2	0	0	0	0	2	0	0	0	1	0	0	0	0	0	0	0	0	0	0	2	1	0
O07752	2	9	4	6	4	1	6	2	2	2	1	3	2	1	1	1	2	0	0	1	2	0	1	2	2	4	4	1	1	2	2	6	2	1	1	3	1	0	1	1	2	2	1	1	1	1	4	2	0
O07753	14	5	2	11	3	0	4	15	7	5	1	3	7	2	2	1	6	0	0	25	1	0	13	17	6	9	12	3	3	14	12	13	1	1	1	0	1	0	7	5	1	1	0	1	1	3	22	21	0
O07754	0	0	0	0	0	0	0	0	0	0	0	0	0	0	0	0	0	0	0	0	0	0	0	0	0	1	1	0	0	0	0	0	0	0	0	0	0	0	0	0	0	0	0	0	0	0	0	1	0
O07755	0	0	0	0	0	0	0	0	0	0	0	0	0	0	0	0	0	0	0	0	0	0	0	0	0	0	0	0	0	0	0	0	0	0	0	0	0	0	0	0	0	0	0	0	0	0	0	0	0
O07756	0	0	0	0	0	0	0	0	0	0	0	0	0	0	0	0	0	0	0	0	0	0	0	0	0	0	1	0	0	0	0	0	0	0	0	0	0	0	0	0	0	0	0	0	0	0	0	1	0
O07760	0	0	0	0	0	0	0	0	0	0	0	0	0	0	0	0	0	0	0	0	0	0	0	0	0	0	0	0	0	0	0	0	0	0	0	0	0	0	0	0	0	0	0	0	0	0	0	0	0
O07761	0	0	0	0	0	0	0	0	0	0	0	0	0	0	0	0	0	0	0	0	0	0	0	0	0	0	0	0	0	0	0	0	0	0	0	0	0	0	0	0	0	0	0	0	0	0	0	0	0
O07762	0	0	0	0	0	0	0	0	0	0	0	0	0	0	0	0	0	0	0	0	0	0	0	0	0	0	0	0	0	0	0	0	0	0	0	0	0	0	0	0	0	0	0	0	0	0	0	0	0
O07763	0	0	0	0	0	0	0	0	0	0	0	0	0	0	0	0	0	0	0	0	0	0	0	0	0	0	0	0	0	0	0	0	0	0	0	0	0	0	0	0	0	0	0	0	0	0	0	0	0
O07764	0	0	0	0	0	0	0	0	0	0	0	0	0	0	0	0	0	0	0	0	1	0	2	0	1	0	0	1	1	2	3	1	0	1	1	3	0	0	4	4	0	0	0	0	0	1	0	0	0
O07765	0	0	0	0	0	0	0	0	0	0	0	0	0	0	0	0	0	0	0	0	0	0	0	0	0	0	0	0	0	0	0	0	0	0	0	0	0	0	0	0	0	0	0	0	0	0	0	0	0
O07766	0	0	0	0	0	0	0	0	0	0	0	0	0	0	0	0	0	0	0	0	0	0	0	0	0	0	0	0	0	0	0	0	0	0	0	0	0	0	0	0	0	0	0	0	0	0	0	0	0
O07767	0	0	0	0	0	0	0	0	0	0	0	0	0	0	0	0	0	0	0	0	0	0	0	0	0	0	0	0	0	0	0	0	0	0	0	0	0	0	0	0	0	0	0	0	0	0	0	0	0
O07770	0	0	0	0	0	0	0	0	0	0	0	0	0	0	0	0	0	0	0	0	0	0	0	0	0	0	0	0	0	0	0	0	0	0	0	0	0	0	0	0	0	0	0	0	0	0	0	0	0
O07771	0	0	0	0	0	0	0	0	0	0	0	0	0	0	0	0	0	0	0	0	0	0	0	0	0	0	0	0	0	0	0	0	0	0	0	0	0	0	0	0	0	0	0	0	0	0	0	0	0
O07772	0	0	0	0	0	0	0	0	0	0	0	0	0	0	0	0	0	0	0	0	3	0	0	0	0	0	4	0	0	0	0	0	0	0	0	3	0	0	0	0	0	0	20	12	1	0	0	0	0
O07773	0	0	0	0	0	0	0	0	0	0	0	0	0	0	0	0	0	0	0	0	2	2	5	3	5	0	8	0	0	0	3	3	0	0	0	7	2	2	2	2	0	0	2	1	0	0	6	7	0
O07774	0	0	0	0	0	0	0	0	0	0	0	0	0	0	0	0	0	0	0	0	0	0	0	0	1	0	0	0	0	0	0	0	0	0	0	0	0	0	0	0	0	0	0	0	0	0	0	1	0
O07775	0	0	0	0	0	0	0	0	0	0	0	0	0	0	0	0	0	0	0	0	0	0	0	0	0	0	0	0	0	0	0	0	0	0	0	0	0	0	0	0	0	0	0	0	0	0	0	0	0
O07776	0	6	0	0	0	0	0	0	0	0	0	1	6	1	2	0	0	0	0	0	89	2	39	13	58	16	17	5	6	42	30	39	4	25	24	40	26	1	67	73	3	3	85	84	4	33	18	21	0
O07777	0	0	0	0	0	0	0	0	0	0	0	0	1	0	0	0	0	0	0	0	6	0	10	3	7	6	5	1	0	4	4	8	0	2	1	6	2	0	5	8	0	0	4	5	0	2	3	5	0
O07778	0	9	0	0	0	1	0	0	0	0	1	0	2	1	1	1	0	0	0	1	80	1	46	13	51	8	17	3	3	33	24	40	5	28	19	35	20	3	74	90	3	3	112	109	3	7	11	15	0
O07779	0	0	0	0	0	0	0	0	0	0	0	0	0	0	0	0	0	0	0	0	0	0	0	0	0	0	0	0	0	0	0	0	0	0	0	0	0	0	0	0	0	0	0	0	0	0	0	0	0
O07780	0	0	0	0	0	0	0	0	0	0	0	0	0	0	0	0	0	0	0	0	0	0	0	0	0	0	0	0	0	0	0	0	0	0	0	0	0	0	0	0	0	0	0	0	0	0	0	0	0
O07781	0	0	0	0	0	0	0	0	0	0	0	0	0	0	0	0	0	0	0	0	0	0	0	0	0	0	0	2	3	0	0	0	0	0	1	0	0	4	0	0	0	0	0	0	0	1	0	0	0
O07782	0	0	0	0	0	0	0	0	0	0	0	0	0	0	0	0	0	0	0	0	0	0	0	0	0	0	0	0	0	0	0	0	0	0	0	0	0	0	0	0	0	0	0	0	0	0	0	0	0
O07783	0	0	0	0	0	0	0	0	0	0	0	0	0	0	0	0	0	0	0	0	4	0	0	0	2	0	1	4	0	0	1	3	0	0	0	0	0	0	0	0	0	0	5	2	0	0	0	0	0
O07784	2	4	11	2	5	0	16	2	5	17	5	13	8	1	1	0	14	0	3	0	1	0	4	2	1	0	2	1	1	2	2	1	1	1	2	0	0	1	2	2	1	1	1	1	2	1	1	0	0
O07785	0	2	0	0	0	0	0	0	0	0	0	0	0	1	1	0	0	0	0	0	1	0	3	2	1	0	3	1	1	2	2	1	1	2	2	0	0	1	2	1	1	1	1	1	2	1	0	0	0
O07786	0	2	1	0	1	0	1	0	0	0	1	0	1	1	1	0	0	0	0	0	1	0	3	2	1	0	3	1	1	2	2	1	1	2	2	0	0	1	2	1	1	1	1	1	2	1	0	0	0
O07787	0	3	1	0	1	0	0	1	2	0	0	2	1	1	1	0	0	0	0	0	2	0	3	2	1	0	4	1	1	2	2	1	1	2	2	0	0	1	2	1	1	1	1	1	2	1	0	0	0
O07788	0	2	0	0	0	0	0	0	0	0	0	0	0	1	1	0	0	0	0	0	1	0	3	1	1	0	2	1	1	1	1	1	1	0	2	0	0	1	1	1	1	1	1	1	2	1	0	0	0
O07790	0	1	0	0	0	0	0	0	0	0	0	0	0	1	1	0	0	0	0	0	1	0	3	1	1	0	2	1	1	1	1	1	1	0	2	0	0	1	2	1	1	1	1	1	2	1	0	0	0
O07791	0	1	0	0	0	0	0	0	0	0	0	0	0	1	1	0	0	0	0	0	1	0	3	1	1	0	2	1	1	1	1	1	1	0	2	0	0	1	2	1	1	1	1	1	2	1	0	0	0
O07794	4	36	15	7	15	1	14	11	8	9	9	27	14	14	12	0	19	1	2	3	13	2	8	7	14	7	8	1	2	7	7	17	1	5	4	2	3	1	10	12	1	2	13	11	5	2	9	13	1
O07795	0	0	0	0	0	0	0	0	0	0	0	0	0	0	0	0	0	0	0	0	2	2	5	3	4	2	8	0	0	0	3	3	0	0	0	7	1	2	4	2	0	0	2	1	1	0	4	7	0
O07796	0	0	0	0	0	0	0	0	0	0	0	0	0	0	0	0	0	0	0	0	3	0	0	0	0	0	4	0	0	0	0	0	0	0	0	3	0	0	0	0	0	0	23	14	2	0	0	0	0
O07797	23	56	38	35	31	4	53	46	20	30	13	79	48	12	14	6	48	4	4	10	15	0	18	14	9	5	13	3	2	14	16	12	2	12	12	0	0	1	15	15	0	0	15	23	3	3	17	20	0
O07798	16	22	21	12	19	3	26	18	9	18	16	21	27	13	17	2	16	0	0	3	19	4	19	16	19	7	17	4	7	15	14	33	5	22	11	5	5	3	17	19	5	4	31	37	3	3	18	17	0
O07799	0	0	0	2	0	0	0	0	0	0	1	0	0	1	1	0	0	0	0	1	6	0	5	3	0	1	0	0	0	3	5	5	0	3	0	0	0	0	1	0	0	0	10	15	0	0	0	1	0
O07800	4	0	7	19	8	1	13	2	3	4	7	7	6	5	5	0	6	0	0	0	6	0	8	9	8	3	6	2	2	7	7	7	7	10	10	6	1	1	7	8	2	1	7	6	4	7	6	6	0
O07801	0	0	0	0	0	0	0	0	0	0	0	0	0	0	0	0	0	0	0	0	0	0	0	0	0	0	0	0	0	0	0	0	0	0	0	0	0	0	0	0	0	0	0	0	0	0	0	0	0
O07802	0	0	0	0	0	0	0	0	0	0	0	0	0	0	0	0	0	0	0	0	0	0	0	0	0	0	0	0	0	0	0	0	0	0	0	0	0	0	0	0	0	0	0	0	0	0	0	0	0
O07804	0	0	0	2	0	0	0	0	0	0	0	0	0	0	0	0	0	0	0	0	0	0	0	0	0	0	0	0	0	0	0	0	0	0	0	0	0	0	0	0	0	0	0	0	0	0	0	0	0
O07805	1	2	4	5	3	0	5	2	1	3	0	7	5	3	3	2	4	1	1	2	5	0	3	2	4	1	1	1	3	0	0	3	1	2	1	3	2	0	5	3	0	0	5	5	0	0	2	2	0
O07806	1	2	4	1	3	0	0	0	0	2	1	3	4	1	0	0	2	0	0	0	2	1	1	2	0	0	1	2	1	0	0	1	0	2	0	2	2	0	0	2	0	0	1	1	0	0	1	3	0
O07807	11	21	15	16	16	2	17	14	10	13	10	23	14	5	4	4	16	2	2	5	5	3	4	6	5	2	3	2	2	6	5	2	3	10	3	2	1	2	11	11	1	1	7	7	2	4	4	5	1
O07808	10	19	14	16	13	2	16	13	10	11	7	23	13	4	3	4	14	2	2	3	5	3	4	6	5	3	3	2	2	6	5	2	3	10	3	2	1	2	11	11	1	1	7	7	2	4	4	5	1
O07809	11	22	15	16	15	2	17	14	11	12	10	24	13	4	3	4	16	2	2	5	5	3	4	6	5	2	3	2	2	6	5	2	3	10	3	2	1	2	11	11	1	1	7	7	2	4	4	5	1
O07810	0	11	2	0	2	2	0	1	0	2	0	2	0	3	4	4	2	10	11	1	3	3	1	4	5	1	2	6	6	6	5	2	2	2	1	3	1	0	1	2	0	0	3	4	1	2	3	3	2
O07914	0	0	0	0	0	0	0	0	0	0	0	0	0	0	0	0	0	0	0	0	1	1	4	6	0	2	1	1	0	1	1	24	0	1	0	0	0	0	0	0	0	0	2	7	0	0	15	13	0
O07927	6	28	12	7	12	2	18	9	5	9	9	20	17	8	8	5	16	4	4	8	10	8	11	17	9	13	8	5	4	15	13	9	2	15	12	6	10	2	12	11	4	3	12	12	5	5	19	19	2
O07932	0	0	0	0	0	0	0	0	0	0	0	0	0	0	0	0	0	0	0	0	0	0	0	0	0	0	0	0	0	0	0	0	0	0	0	0	0	0	0	0	0	0	0	0	0	0	0	0	0
O08343	2	5	4	4	2	1	5	4	2	3	3	11	6	2	3	1	7	1	1	2	1	1	2	2	1	1	1	3	2	3	3	2	2	2	1	1	1	1	2	3	1	2	2	1	1	1	1	1	1
O08362	87	249	81	75	59	0	147	80	59	52	6	146	78	11	8	0	170	0	0	3	10	0	0	0	1	2	0	0	0	0	0	4	0	2	0	0	0	0	0	0	0	0	6	4	0	0	3	5	0
O08377	0	0	0	0	0	0	0	0	0	0	0	0	1	0	0	0	0	0	0	0	30	3	14	45	14	7	7	6	4	17	16	29	2	21	7	17	7	0	15	14	0	0	13	11	5	4	26	31	0
O08395	3	7	3	3	3	0	3	6	2	2	1	4	3	2	2	2	3	1	2	3	2	0	1	2	1	2	2	0	0	2	2	4	1	2	2	0	0	0	1	1	1	1	1	1	1	2	3	2	0
O08446	4	10	4	2	2	0	3	4	2	2	3	4	7	2	3	0	1	0	0	2	17	5	6	8	13	2	8	6	5	9	8	14	2	10	11	12	10	2	11	15	0	0	17	14	3	4	32	25	1
O08447	98	280	90	80	71	0	175	88	60	60	8	166	85	11	8	0	191	0	0	3	10	0	0	0	1	2	0	0	0	0	0	4	0	2	0	0	0	0	0	0	0	0	6	4	0	0	3	5	0
O33175	0	0	1	0	0	0	0	0	0	0	0	0	5	0	0	0	0	0	0	0	14	0	67	52	7	0	27	12	20	54	46	69	2	14	6	6	6	0	23	11	0	0	7	9	2	4	18	16	0
O33177	2	47	7	6	6	0	5	3	3	4	4	10	5	5	4	0	7	0	0	4	4	1	7	1	2	2	3	1	1	3	2	4	1	2	2	3	0	0	6	5	0	0	5	5	1	1	5	5	0
O33178	0	0	0	0	0	0	0	0	0	0	0	0	0	0	0	0	0	0	0	0	0	0	0	0	0	0	0	0	1	1	1	0	0	0	0	0	0	0	0	0	0	0	0	0	0	0	0	0	0
O33179	0	0	0	0	0	0	0	0	0	0	0	0	1	0	0	0	0	0	0	0	30	2	9	43	11	4	5	5	4	14	14	26	2	18	6	17	6	0	12	12	0	0	11	11	5	0	21	24	0
O33180	87	247	79	75	58	0	149	83	59	52	6	146	77	11	8	0	166	0	0	3	10	0	0	0	1	2	0	0	0	0	0	4	0	2	0	0	0	0	0	0	0	0	6	4	0	0	3	5	0
O33181	0	0	0	0	0	0	0	0	0	0	0	0	0	0	0	0	0	0	0	0	0	0	0	0	0	1	0	0	0	0	0	0	0	0	0	0	0	0	0	0	0	0	0	0	0	0	0	0	0
O33182	0	0	0	0	2	0	0	1	0	1	6	0	0	0	0	0	0	0	0	1	4	0	6	7	1	1	1	1	0	4	2	11	2	1	4	6	2	0	2	3	1	1	6	10	0	0	6	5	0
O33183	1	1	2	2	4	0	2	3	1	3	1	4	4	4	2	1	3	0	0	0	8	2	2	3	12	2	8	1	3	1	3	2	6	3	2	12	8	0	9	12	1	0	6	6	5	4	1	2	0
O33184	6	7	43	17	48	0	71	17	7	36	23	106	14	3	6	4	75	1	2	1	0	0	0	1	0	0	0	1	0	1	0	0	0	0	0	0	0	2	0	0	0	0	0	1	0	0	0	0	0
O33185	23	58	38	34	32	4	53	47	19	30	12	81	47	12	16	6	48	4	4	9	17	0	21	16	9	6	17	3	2	14	17	16	2	14	17	0	0	1	17	15	0	0	15	23	3	3	18	19	0
O33186	0	1	2	0	1	0	1	0	0	1	0	1	1	0	0	0	1	0	0	0	0	0	1	0	0	1	1	1	0	1	1	1	0	1	1	0	0	0	1	1	1	1	0	0	0	0	0	1	0
O33187	0	0	0	0	0	0	0	0	0	0	0	0	0	0	0	0	0	0	0	0	18	1	5	8	9	4	2	0	0	10	12	22	1	12	5	3	1	0	10	9	0	0	6	8	3	0	11	12	0
O33188	4	2	2	0	2	0	6	7	2	2	4	2	1	1	1	0	2	0	0	3	4	1	3	4	5	6	3	3	3	5	5	3	3	4	3	8	4	1	8	5	0	0	5	4	0	2	6	4	0
O33189	12	17	17	4	14	0	14	15	5	12	7	29	12	2	2	0	34	0	0	0	29	12	22	15	20	21	19	15	17	25	22	76	14	6	13	42	27	5	23	26	1	1	34	34	5	7	37	31	3
O33192	0	0	0	0	0	0	0	0	0	0	0	0	0	0	0	0	0	0	0	0	0	0	0	0	0	0	0	0	0	0	0	0	0	0	0	0	0	0	0	0	0	0	0	0	0	0	0	0	0
O33193	0	0	0	0	0	0	0	0	0	0	0	0	0	0	0	0	0	0	0	0	0	0	0	0	0	1	0	0	0	0	0	0	0	0	0	0	0	0	2	0	0	0	0	0	0	0	1	1	0
O33194	7	8	9	9	10	0	12	16	9	6	3	11	4	3	4	1	10	0	0	2	3	1	2	3	0	1	2	2	1	4	2	1	0	1	3	1	2	0	1	0	0	0	1	2	1	0	2	2	1
O33195	0	0	0	0	0	0	0	0	0	0	0	0	0	0	0	0	0	0	0	0	0	0	0	0	0	0	0	0	0	0	0	0	0	0	0	0	0	0	0	0	0	0	0	0	0	0	0	0	0
O33198	0	0	0	0	0	0	0	0	0	0	0	0	0	0	0	0	0	0	0	0	0	0	0	0	0	1	0	0	0	0	0	0	0	0	0	1	1	0	0	0	0	0	0	0	0	0	0	0	0
O33199	4	6	5	4	10	0	18	10	3	5	3	9	6	4	2	0	5	1	1	1	7	0	4	4	3	2	4	3	4	8	9	4	3	4	5	2	1	0	2	3	0	0	5	5	2	4	5	5	1
O33202	2	12	5	12	6	1	6	2	2	3	8	7	9	6	12	0	6	2	1	0	9	1	6	3	7	3	4	5	3	6	5	4	3	3	7	3	3	1	6	5	1	1	10	12	2	2	4	5	1
O33203	5	13	29	9	11	0	25	12	8	11	1	22	9	1	1	0	22	0	0	18	1	0	2	20	14	1	3	0	0	4	4	2	2	0	0	1	2	0	0	1	0	0	0	0	0	0	24	17	0
O33206	10	12	13	10	14	1	20	13	8	11	5	23	3	1	2	1	17	1	1	4	5	0	3	4	4	1	0	1	1	2	2	2	1	3	3	1	0	0	0	1	0	0	3	1	1	3	3	5	0
O33207	2	3	3	1	2	1	3	1	2	3	5	4	2	3	4	1	3	2	2	2	24	2	10	8	6	5	11	2	1	8	11	10	4	7	10	11	7	2	9	11	1	1	23	23	7	3	12	15	0
O33208	0	0	0	0	0	0	0	0	0	0	0	0	0	0	0	0	0	0	0	0	1	0	1	1	1	1	1	0	0	1	1	1	0	1	1	1	1	0	1	1	0	0	1	1	1	0	1	1	0
O33209	0	0	0	0	0	0	0	0	0	0	0	0	0	0	0	0	0	0	0	0	1	0	1	1	1	1	1	0	0	1	1	1	0	1	1	1	1	0	1	1	0	0	1	1	0	0	1	1	0
O33215	0	0	0	0	0	0	0	0	0	0	0	0	0	0	0	0	0	0	0	0	0	0	0	0	0	0	0	0	0	0	0	0	0	0	0	0	0	0	0	0	0	0	0	0	0	0	0	0	0
O33219	8	40	11	14	9	1	16	6	4	9	8	15	13	18	16	3	11	4	2	0	18	1	9	6	13	5	10	5	3	10	8	10	3	9	12	9	7	4	12	12	2	2	17	19	5	2	6	10	1
O33220	0	0	0	0	0	0	0	0	0	0	0	0	0	0	0	0	0	0	0	0	0	0	0	1	0	1	1	1	1	1	1	1	0	1	0	0	0	0	0	0	0	0	0	0	0	0	1	1	0
O33221	8	10	9	10	10	0	15	17	10	7	3	11	7	4	4	1	10	0	0	3	4	3	3	5	3	2	2	4	4	7	7	2	0	5	3	3	2	0	1	1	0	0	4	4	2	1	4	4	1
O33222	0	0	0	0	0	0	0	0	0	0	0	0	0	0	0	0	0	0	0	0	0	0	0	0	0	1	0	0	0	0	0	0	0	0	1	0	0	0	0	0	0	0	0	0	0	0	1	1	0
O33223	0	0	0	0	0	0	0	0	0	0	0	0	0	0	0	0	0	0	0	0	0	0	0	0	0	1	1	0	0	0	0	0	0	0	2	0	0	0	0	0	0	0	0	0	0	0	2	3	0
O33224	0	0	0	0	0	0	0	0	0	0	0	0	0	0	0	0	0	0	0	0	0	0	0	0	0	0	0	0	0	0	0	0	0	0	0	0	0	0	0	0	0	0	0	0	0	0	0	0	0
O33227	0	0	0	0	0	0	0	0	0	0	0	0	0	0	0	0	0	0	0	0	0	0	0	0	0	0	0	0	0	0	0	0	0	0	0	0	0	0	0	0	0	0	0	0	0	0	0	0	0
O33229	12	10	22	31	17	0	29	17	13	15	11	35	19	5	5	0	19	0	0	1	4	1	21	26	5	4	12	0	0	5	4	14	0	22	3	1	3	0	8	9	0	0	2	2	0	0	8	9	0
O33230	10	22	13	9	12	3	11	13	7	11	7	19	11	17	15	8	18	8	7	6	8	4	7	7	6	6	7	6	8	9	7	5	5	7	7	7	8	7	7	9	6	3	8	9	7	5	5	5	3
O33233	0	0	0	0	0	0	0	0	0	0	0	0	0	0	0	0	0	0	0	0	0	0	0	0	0	1	0	0	0	0	0	0	0	0	0	1	0	0	0	0	0	0	0	0	0	0	0	0	0
O33234	1	9	3	2	2	0	2	0	0	2	1	3	1	1	1	0	2	0	0	0	0	0	0	0	0	3	0	0	0	0	0	0	0	0	0	0	0	0	0	0	0	0	0	0	0	0	1	1	0
O33235	0	0	0	0	0	0	0	0	0	0	0	0	0	0	0	0	0	0	0	0	0	0	0	0	0	0	0	0	0	0	0	0	0	0	0	0	0	0	0	0	0	0	0	0	0	0	0	0	0
O33236	0	0	1	0	0	0	0	0	0	1	0	0	2	0	0	0	0	0	0	0	0	0	1	0	0	1	0	0	0	0	0	0	0	1	0	0	0	0	0	0	0	0	0	0	0	0	1	1	0
O33237	0	0	0	0	0	0	0	0	0	0	0	0	0	0	0	0	0	0	0	0	0	0	0	0	0	0	0	0	0	0	0	0	0	0	0	0	0	0	0	0	0	0	0	0	0	0	0	0	0
O33239	0	0	0	0	0	0	0	0	0	0	0	0	0	0	0	0	0	0	0	0	3	0	1	0	0	0	0	0	0	0	0	0	0	0	0	0	0	0	0	0	0	0	0	1	0	0	0	0	0
O33240	0	0	0	0	0	0	0	0	0	0	0	0	0	0	0	0	0	0	0	0	0	0	0	0	0	0	0	0	0	0	0	0	0	0	0	0	0	0	0	0	0	0	0	1	0	0	0	0	0
O33244	13	29	18	12	15	11	33	31	16	17	13	28	15	13	15	14	25	14	14	13	0	0	0	0	0	2	0	0	0	0	0	0	0	0	0	0	0	0	0	0	0	0	0	0	0	0	2	2	0
O33245	14	29	21	14	15	13	38	31	16	19	14	32	14	14	15	14	31	14	14	14	0	0	0	0	0	1	0	0	0	0	0	0	0	0	0	0	0	0	0	0	1	0	0	0	0	0	1	1	0
O33246	0	0	0	0	0	0	0	0	0	0	0	0	0	0	0	0	0	0	0	0	0	0	0	0	0	0	0	0	0	0	0	0	0	0	0	0	0	0	0	0	0	0	0	0	0	0	0	0	0
O33247	0	0	0	0	0	0	0	0	0	0	0	0	0	0	0	0	0	0	0	0	0	0	0	0	0	2	0	0	0	0	0	0	0	0	0	0	0	0	0	0	0	0	0	0	0	0	2	2	0
O33248	0	0	0	0	0	0	0	0	0	0	0	0	0	0	0	0	0	0	0	0	0	0	0	0	0	0	0	0	0	0	0	0	0	0	0	0	0	0	0	0	0	0	0	0	0	0	0	0	0
O33249	0	0	0	0	0	0	0	0	0	0	0	0	0	0	0	0	0	0	0	0	0	0	0	0	0	0	0	0	0	0	0	0	0	0	0	0	0	0	0	0	0	0	0	0	0	0	0	0	0
O33252	0	0	0	0	0	0	0	0	0	0	0	0	0	0	0	0	0	0	0	0	0	0	0	0	1	1	0	0	0	0	0	0	0	0	0	1	0	0	1	1	0	0	0	0	0	0	1	1	0
O33253	3	11	8	5	9	1	9	4	3	6	3	9	5	2	9	1	8	1	1	1	8	0	3	2	6	1	1	2	0	2	2	5	2	2	5	5	3	1	7	6	2	1	5	5	2	0	4	5	0
O33254	2	0	1	2	0	0	1	3	1	0	0	3	0	0	0	0	2	0	0	0	10	0	2	0	1	3	2	0	1	0	0	2	2	0	0	3	2	1	5	4	1	1	3	3	0	1	2	3	0
O33255	0	0	0	0	0	0	0	0	0	0	0	0	0	0	0	0	0	0	0	0	0	0	0	0	0	0	0	0	0	0	0	1	0	0	0	0	0	0	0	0	0	0	0	0	0	0	0	0	0
O33259	1	5	3	2	5	0	9	3	2	3	1	7	8	1	1	0	3	0	0	3	2	0	3	2	3	2	1	1	1	2	2	2	1	1	1	11	3	0	3	3	0	0	2	2	0	1	1	1	0
O33260	0	0	0	0	0	0	0	0	0	0	0	0	0	0	0	0	0	0	0	0	0	0	0	0	0	2	0	0	0	0	0	0	0	0	0	0	0	0	0	0	0	0	0	0	0	0	2	2	0
O33261	11	16	35	15	17	0	34	18	9	12	1	24	12	1	1	0	26	0	0	20	1	0	2	21	15	2	4	1	1	5	5	2	2	0	0	1	2	0	0	1	0	0	0	0	0	0	28	19	0
O33262	0	0	0	0	0	0	0	0	0	0	0	0	0	0	0	0	0	0	0	0	0	0	0	0	0	0	0	0	0	0	0	0	0	0	0	0	0	0	0	0	0	0	0	0	0	0	0	0	0
O33263	39	85	67	49	55	2	113	65	35	49	27	79	65	9	8	1	68	1	1	9	29	4	25	31	25	7	37	3	9	17	17	62	5	23	8	3	5	1	19	19	2	2	22	27	2	4	36	33	0
O33266	0	0	0	0	0	0	0	0	0	0	0	0	0	0	0	0	0	0	0	0	2	0	0	0	1	1	1	0	0	0	0	0	0	0	1	0	0	0	13	15	0	0	2	1	0	0	10	9	0
O33268	0	0	0	0	0	0	0	0	0	0	0	0	1	1	1	0	0	0	0	0	2	0	2	1	4	3	4	3	2	3	1	1	0	1	6	1	0	0	7	6	0	0	2	2	3	3	0	3	0
O33269	0	0	1	0	0	0	0	1	0	2	0	1	1	0	0	0	1	0	0	0	20	0	13	5	17	6	2	2	2	12	9	17	0	8	9	8	1	0	9	8	0	0	19	17	0	1	15	15	0
O33270	0	0	0	0	0	0	0	0	0	0	0	0	0	0	0	0	0	0	0	0	0	0	0	0	0	0	0	0	0	0	0	0	0	0	0	0	0	0	0	0	0	0	0	0	0	0	0	0	0
O33271	0	0	0	0	0	0	0	0	0	0	0	0	0	0	0	0	0	0	0	0	0	0	0	0	0	0	0	0	0	0	0	0	0	0	0	0	0	0	0	0	0	0	0	0	0	0	0	0	0
O33272	0	2	0	0	0	0	0	0	0	0	0	0	1	0	0	0	0	0	0	0	2	0	2	1	4	0	1	1	1	3	4	3	0	1	2	0	0	0	5	4	2	2	2	3	0	2	4	3	0
O33273	0	0	0	0	0	0	0	0	0	0	0	0	0	0	0	0	0	0	0	0	0	0	0	0	0	0	0	0	0	0	0	0	0	0	0	0	0	0	0	0	0	0	0	0	0	0	0	0	0
O33279	3	7	3	4	4	0	2	6	3	3	2	4	5	4	2	2	7	0	0	2	2	0	2	0	1	0	1	0	0	0	0	0	0	1	2	1	1	0	3	4	0	0	0	0	2	0	0	0	0
O33281	0	0	0	0	0	0	0	0	0	0	0	0	0	0	0	0	0	0	0	0	0	0	0	0	0	1	0	0	0	0	0	0	0	0	0	0	0	0	0	0	0	0	0	0	0	0	1	1	0
O33282	21	14	27	39	5	0	53	33	16	21	1	32	8	1	0	0	34	0	0	1	3	0	2	0	2	1	0	1	1	2	2	1	1	1	0	0	0	0	1	2	0	0	0	0	0	0	2	0	0
O33283	0	0	0	0	0	0	0	0	0	0	0	0	0	0	0	0	0	0	0	0	0	0	0	0	0	0	0	0	0	0	0	0	0	0	0	0	0	0	0	0	0	0	0	0	0	0	0	0	0
O33285	0	0	0	0	0	0	0	0	0	0	0	0	0	0	0	0	0	0	0	0	0	0	0	0	0	1	0	0	0	0	0	0	0	0	0	0	0	0	0	0	0	0	0	0	0	0	1	1	0
O33286	0	0	0	0	0	0	0	0	0	0	0	0	0	0	0	0	0	0	0	0	0	0	0	0	0	0	0	0	0	0	0	0	0	0	0	0	0	0	0	0	0	0	0	0	0	0	0	0	0
O33287	0	0	1	0	0	0	0	0	0	0	0	0	0	0	0	0	0	0	0	0	7	3	4	4	11	4	9	1	3	6	4	10	1	1	1	14	12	0	8	6	2	2	9	7	0	2	8	8	0
O33288	4	8	4	4	4	1	8	5	3	5	2	13	4	4	3	0	8	2	1	3	2	1	2	2	4	3	2	1	1	1	1	2	2	2	2	3	4	2	4	3	2	2	1	1	5	2	2	3	1
O33289	6	12	8	3	7	3	16	9	5	8	5	17	10	6	6	1	15	3	3	1	35	1	14	13	18	6	8	4	5	26	21	25	6	5	4	12	10	0	8	10	0	1	18	17	3	3	22	18	0
O33290	0	0	0	0	0	0	0	0	0	0	0	0	1	0	0	1	0	0	0	0	0	1	1	1	1	2	2	1	1	1	1	2	1	1	1	1	1	1	1	1	1	1	1	2	1	1	3	3	0
O33291	0	0	1	0	2	0	2	0	0	3	2	4	1	1	1	0	5	0	0	0	1	0	0	2	1	0	2	1	2	2	3	4	0	1	0	0	0	0	0	0	0	0	0	0	0	1	3	6	0
O33292	38	88	61	47	44	1	100	63	34	45	25	73	58	6	9	1	62	0	0	7	29	4	26	32	24	7	37	3	9	15	15	60	7	22	10	3	5	1	22	22	2	4	21	27	3	3	36	35	0
O33293	1	5	2	1	2	0	5	1	1	2	2	3	2	3	1	1	2	4	4	2	5	0	1	1	0	0	0	0	1	0	0	0	0	1	0	0	0	0	1	0	0	0	2	0	0	0	0	1	0
O33294	5	13	11	5	8	2	9	5	4	7	6	17	10	7	7	4	9	3	3	2	3	5	2	2	6	2	3	1	2	2	2	4	4	3	3	11	5	0	5	5	1	2	3	3	1	4	3	4	2
O33298	0	1	1	0	2	0	2	0	1	1	0	1	2	0	0	0	1	0	0	0	3	3	1	0	1	0	1	3	1	0	1	1	1	1	2	4	1	0	1	0	0	0	6	3	1	1	2	2	0
O33299	0	0	0	0	0	0	0	0	0	0	0	0	0	0	0	0	0	0	0	0	2	0	0	0	1	0	0	0	0	0	0	1	0	0	0	0	0	0	0	0	0	0	5	1	0	0	0	0	0
O33300	0	0	0	0	0	0	0	0	0	0	0	0	0	0	0	0	0	0	0	0	0	0	0	0	0	0	0	0	0	0	0	0	0	0	0	0	0	0	0	0	0	0	0	0	0	0	0	0	0
O33302	0	0	0	0	0	0	0	0	0	0	0	0	0	0	0	0	0	0	0	0	0	0	0	0	0	0	0	0	0	0	0	0	0	0	0	0	0	0	0	0	0	0	0	0	0	0	0	0	0
O33303	0	0	0	0	0	0	0	0	0	0	0	0	0	0	0	0	0	0	0	0	3	2	1	0	1	0	0	3	2	0	0	0	1	1	2	3	0	0	1	0	0	0	5	3	0	1	0	1	0
O33304	0	0	0	0	0	0	0	0	0	0	0	0	0	0	0	0	0	0	0	0	2	0	0	1	0	0	0	0	0	1	1	1	0	0	0	0	0	0	1	1	0	0	0	0	0	0	1	1	0
O33307	5	20	21	20	13	0	35	6	2	12	5	31	8	5	5	0	26	0	0	2	12	0	6	5	17	9	5	1	4	3	1	11	1	5	3	1	1	0	7	7	2	2	7	11	1	0	5	7	0
O33309	0	0	0	0	0	0	0	0	0	0	0	0	0	0	0	0	0	0	0	0	0	0	0	0	0	0	0	0	0	0	0	0	0	0	0	0	0	0	0	0	0	0	0	0	0	0	0	0	0
O33313	0	4	0	0	0	0	0	0	0	0	1	0	0	2	2	0	0	0	0	3	2	1	1	4	1	0	1	1	1	1	1	2	0	2	2	5	4	0	0	0	0	0	5	4	1	0	0	1	0
O33314	0	0	0	0	0	0	0	0	0	0	0	0	0	0	0	0	0	0	0	0	0	0	0	0	0	0	0	0	0	0	0	0	0	0	0	0	0	0	0	0	0	0	0	0	0	0	1	1	0
O33316	0	0	0	0	0	0	0	0	0	0	0	0	0	0	0	0	0	0	0	0	0	0	0	0	0	0	0	0	0	0	0	0	0	0	0	0	0	0	0	0	0	0	0	0	0	0	0	0	0
O33317	7	18	13	8	10	1	20	12	9	12	6	29	17	8	11	0	24	1	1	2	32	3	11	14	16	6	11	2	3	28	21	22	5	5	7	16	15	0	6	8	0	0	18	19	3	3	17	15	0
O33319	0	0	0	0	0	0	0	0	0	0	0	0	0	0	0	0	0	0	0	0	0	0	1	9	0	0	0	0	0	0	0	0	0	10	0	0	0	0	0	0	0	0	0	0	0	0	0	0	0
O33320	0	4	0	0	0	0	0	0	0	0	0	0	0	0	0	0	0	0	0	0	6	0	1	1	3	0	0	0	0	0	0	0	0	0	0	0	0	0	4	6	0	0	4	4	0	0	7	12	0
O33321	0	0	0	0	0	0	0	0	0	0	0	0	1	0	0	0	0	0	0	0	0	0	11	11	2	2	4	2	2	5	5	13	1	1	0	1	1	1	1	1	0	0	0	0	0	0	11	11	0
O33323	1	11	2	3	2	0	9	2	1	2	2	4	3	2	2	0	2	1	0	1	3	1	3	4	4	2	4	3	3	1	1	3	0	2	1	3	4	0	3	2	3	3	4	4	2	3	4	3	0
O33325	5	16	15	6	7	2	9	14	6	9	8	14	10	9	12	3	13	2	2	4	5	4	4	4	4	3	3	5	4	4	4	4	3	4	4	8	5	2	4	4	2	2	5	5	3	3	4	4	1
O33326	0	0	0	0	0	0	0	0	0	0	0	0	0	0	0	0	0	0	0	0	0	0	0	0	0	0	0	0	0	0	0	0	0	0	0	0	0	0	0	0	0	0	0	0	0	0	0	0	0
O33328	0	6	1	1	2	0	1	1	1	1	1	1	1	3	3	2	3	1	1	1	1	1	1	1	1	1	1	1	1	1	1	1	2	1	1	1	1	0	1	1	1	1	1	1	1	1	1	1	0
O33329	3	5	4	1	3	1	3	2	2	3	3	4	2	4	4	1	4	1	2	1	20	2	10	7	7	6	12	3	2	7	9	12	4	9	11	10	7	2	9	11	2	1	22	22	6	3	13	18	0
O33330	0	0	0	0	0	0	0	0	0	0	0	0	0	0	0	0	0	0	0	0	2	1	0	1	1	1	1	0	0	0	0	0	2	0	0	1	0	2	2	2	0	0	2	2	0	0	3	4	0
O33331	12	10	22	31	18	0	29	17	12	15	11	35	19	5	5	0	20	0	0	1	4	1	20	25	5	4	12	0	0	5	4	11	0	22	3	1	3	0	8	10	0	0	2	2	0	0	8	9	0
O33332	6	7	8	7	8	0	12	11	6	6	5	17	10	2	2	1	19	0	0	2	4	2	7	10	4	2	6	2	1	5	5	8	1	8	4	4	4	1	6	6	1	1	1	2	1	1	9	9	0
O33333	0	0	0	0	0	0	0	0	0	0	0	0	0	0	0	0	0	0	0	0	3	0	0	0	0	0	4	0	0	0	0	0	0	0	0	3	0	0	0	0	0	0	23	12	2	0	0	0	0
O33334	0	0	0	0	0	0	0	0	0	0	0	0	0	0	0	0	0	0	0	0	2	2	5	3	4	0	7	0	0	0	3	3	0	0	0	7	2	2	3	1	0	0	2	1	0	0	6	7	0
O33336	0	0	0	0	0	0	0	0	0	0	0	0	0	0	0	0	0	0	0	0	0	0	0	1	1	0	0	0	0	1	2	1	0	2	0	0	0	0	0	0	0	0	0	0	0	0	0	0	0
O33337	0	0	0	0	0	0	0	0	0	0	0	0	2	2	2	0	0	0	0	0	1	0	2	1	3	0	1	0	0	0	0	0	1	0	0	2	0	1	1	2	0	0	0	0	0	0	0	0	0
O33339	37	82	56	44	46	1	84	60	33	40	25	69	56	8	8	2	57	0	0	7	28	4	27	32	24	7	39	3	9	16	16	62	7	22	10	3	5	1	22	20	3	2	20	26	3	4	36	34	0
O33340	12	20	26	19	19	1	31	19	8	18	11	35	26	6	6	0	45	0	0	9	5	2	13	25	9	9	11	2	1	10	9	20	1	7	4	3	2	0	3	4	1	1	5	5	1	2	32	27	0
O33341	4	28	6	5	6	1	11	8	5	6	7	13	14	6	6	3	10	1	1	8	6	2	7	7	7	10	8	5	5	9	8	9	7	7	8	10	0	0	6	7	5	5	8	7	5	8	13	8	1
O33342	2	9	4	6	4	1	7	2	2	2	1	4	2	1	1	1	2	0	0	1	2	0	1	2	2	4	4	1	1	2	2	6	2	1	1	3	1	0	1	1	2	2	1	1	1	1	4	2	0
O33344	0	0	0	0	0	0	0	0	0	0	0	0	0	0	0	0	0	0	0	0	0	0	0	0	1	1	0	0	0	0	0	0	0	0	0	1	0	0	0	0	0	0	0	0	0	0	0	0	0
O33345	0	0	0	0	0	0	0	0	0	0	0	0	0	0	0	0	0	0	0	0	0	0	0	0	0	0	0	0	0	0	0	0	0	0	0	0	0	0	0	0	0	0	0	0	0	0	0	0	0
O33346	0	0	0	0	0	0	0	0	0	0	0	0	0	0	0	0	0	0	0	0	8	0	5	7	6	5	5	4	4	5	6	6	4	6	4	6	5	3	6	5	2	0	9	7	3	4	6	5	0
O33347	0	0	0	0	0	0	0	0	0	0	0	0	0	0	0	0	0	0	0	0	5	0	1	1	1	0	0	0	0	0	0	1	0	0	2	0	0	0	0	0	0	0	3	1	0	0	1	0	0
O33348	0	0	0	0	0	0	0	0	0	0	0	0	0	0	0	0	0	0	0	0	1	0	0	1	0	0	0	0	0	0	0	1	0	0	1	0	0	0	0	0	0	0	2	2	0	1	1	1	0
O33349	0	0	0	0	0	0	0	0	0	0	0	0	0	0	0	0	0	0	0	0	0	0	0	0	0	1	0	0	0	0	0	0	0	0	0	0	0	0	0	0	0	0	0	1	0	0	1	1	0
O33350	0	3	0	0	0	0	0	0	0	0	0	0	0	1	1	1	0	1	1	0	1	0	1	1	1	1	1	2	1	1	1	1	1	1	1	1	1	0	1	1	1	1	1	1	1	1	1	1	0
O33351	6	9	12	6	7	0	37	7	3	10	2	28	2	2	2	0	13	0	0	0	6	1	4	3	8	4	3	3	2	3	3	4	6	4	5	5	4	2	7	7	2	2	7	8	3	2	3	5	0
O33354	0	0	0	0	0	0	0	0	0	0	0	0	0	0	0	0	0	0	0	0	0	0	0	0	0	0	0	0	0	0	0	0	0	0	0	0	0	0	0	0	0	0	0	0	0	0	0	0	0
O33357	1	2	2	0	1	0	1	1	1	1	1	1	1	1	1	1	2	0	0	1	2	0	1	1	1	1	1	1	1	1	1	1	1	1	1	1	1	0	1	1	1	1	2	3	1	1	1	1	0
O33358	0	0	0	0	0	0	0	0	0	0	0	0	0	0	0	0	0	0	0	0	0	0	0	0	0	0	0	0	0	0	0	0	0	0	0	0	0	0	0	0	0	0	0	0	0	0	0	0	0
O33359	0	0	0	0	0	0	0	0	0	0	0	0	0	0	0	0	0	0	0	0	0	0	0	0	0	0	0	0	0	0	0	0	0	0	0	0	0	0	0	0	0	0	0	0	0	0	0	0	0
O33360	0	0	0	0	0	0	0	0	0	0	0	0	0	0	0	0	0	0	0	0	2	0	0	0	1	1	1	0	0	0	0	0	0	0	1	0	0	0	13	15	0	0	2	1	0	0	10	9	0
O33361	0	0	0	0	0	0	0	0	0	0	0	0	0	0	0	0	0	0	0	0	0	0	0	0	0	1	0	0	0	0	0	0	0	0	0	0	0	0	0	0	0	0	0	1	0	0	1	1	0
O33362	24	0	3	63	0	0	0	24	6	0	2	2	3	2	3	0	2	0	0	0	3	0	4	1	4	2	4	0	2	1	2	6	6	3	0	1	2	0	3	1	0	0	1	2	0	2	4	7	0
O33363	0	1	3	0	1	0	18	0	0	3	2	3	9	2	1	0	3	0	0	1	3	0	2	3	2	0	2	0	0	1	2	5	9	2	2	1	0	0	2	2	0	0	4	4	0	1	8	9	0
O33364	0	0	0	0	0	0	0	0	0	0	0	0	0	0	0	0	0	0	0	0	1	0	0	0	3	0	0	0	0	1	1	1	0	0	0	0	0	0	1	1	0	0	0	1	0	0	0	1	0
O33365	8	38	20	13	11	1	22	12	7	12	12	26	26	26	25	2	21	4	4	4	41	1	6	6	16	2	13	4	3	8	7	13	4	13	14	8	7	2	20	15	5	3	26	28	6	3	5	14	0
O50377	0	0	0	0	0	0	0	0	0	0	0	0	0	0	0	0	0	0	0	0	0	0	0	0	0	0	0	0	0	0	0	0	0	0	0	0	0	0	0	0	0	0	0	0	0	0	0	0	0
O50380	0	27	0	0	0	0	0	0	0	0	0	0	0	0	0	0	0	0	0	0	1	0	1	0	0	0	0	0	0	0	0	0	0	0	0	0	0	0	0	1	0	0	0	0	0	0	1	1	0
O50381	0	37	5	4	2	0	3	0	0	1	2	4	2	2	1	0	4	0	0	2	2	0	3	0	0	0	1	0	0	0	0	1	0	0	1	0	0	0	1	2	0	0	0	0	0	0	3	2	0
O50382	0	0	0	0	0	0	0	0	0	0	0	0	0	0	0	0	0	0	0	0	0	0	0	0	0	0	0	0	0	0	0	0	0	0	0	0	0	0	0	0	0	0	0	0	0	0	0	0	0
O50383	0	0	0	0	0	0	0	0	0	0	0	0	0	0	0	0	0	0	0	0	0	0	0	0	0	0	0	0	0	0	0	0	0	0	0	0	0	0	0	0	0	0	0	0	0	0	0	0	0
O50384	0	0	0	0	0	0	0	0	0	0	0	0	0	0	0	0	0	0	0	0	0	0	0	0	0	0	0	0	0	0	0	0	0	0	0	0	0	0	0	0	0	0	0	0	0	0	0	0	0
O50385	3	5	5	1	5	0	9	2	1	4	2	5	1	2	2	0	11	0	0	3	2	1	1	1	1	1	1	1	1	1	1	1	1	1	1	1	1	1	1	1	1	1	2	2	1	1	2	1	0
O50388	0	7	2	8	0	0	0	0	0	0	3	0	0	0	0	0	0	0	0	2	5	1	1	6	1	1	3	1	2	4	3	4	1	3	0	1	3	0	1	1	0	0	2	3	0	1	2	3	0
O50389	9	11	12	4	20	3	26	23	9	12	3	25	11	9	8	4	18	4	4	7	33	0	3	1	2	4	2	0	0	0	0	1	1	0	0	1	1	0	14	12	0	0	13	13	0	0	6	7	0
O50390	1	5	2	0	4	0	4	2	1	2	2	4	7	5	5	2	6	0	0	0	72	0	0	0	0	1	0	0	1	2	3	2	0	0	0	2	2	0	0	0	1	1	34	30	0	0	2	1	0
O50391	79	152	210	87	194	12	323	135	67	178	71	293	158	43	35	27	237	26	25	42	21	8	9	11	12	10	9	11	12	12	12	12	9	10	10	13	18	8	18	19	6	6	16	17	13	10	10	11	5
O50392	0	0	0	0	0	0	0	0	0	0	0	0	0	0	0	0	0	0	0	0	0	0	0	0	0	0	0	0	0	0	0	0	0	0	0	0	0	0	0	0	0	0	0	0	0	0	0	0	0
O50393	0	0	0	0	0	0	0	0	0	0	0	0	0	0	0	0	0	0	0	0	0	0	0	0	0	1	0	0	0	0	0	0	0	0	0	0	0	0	0	0	0	0	0	0	1	0	0	0	0
O50394	2	7	3	2	3	2	4	2	2	3	2	2	3	7	7	3	3	0	0	2	5	3	3	4	4	3	2	4	4	5	5	5	2	5	4	3	3	3	3	3	1	1	4	4	2	2	5	5	2
O50397	1	0	1	1	1	0	1	2	1	1	0	1	2	0	0	1	1	0	0	0	2	1	2	4	0	1	1	5	4	2	2	6	4	3	1	7	5	0	1	1	0	0	1	3	0	1	1	1	1
O50398	0	0	0	0	0	0	0	0	0	0	0	0	0	0	0	0	0	0	0	0	0	0	0	0	0	1	0	0	0	0	0	0	0	0	0	0	1	0	0	0	0	0	1	1	0	0	0	0	0
O50399	0	1	0	0	0	0	0	0	0	0	0	0	1	0	0	0	0	0	0	0	2	2	4	2	2	2	2	2	1	2	2	4	1	2	3	2	3	1	2	3	1	1	2	2	1	1	3	2	2
O50400	2	13	0	0	0	1	0	0	0	0	0	0	4	1	1	0	0	0	0	0	1	0	0	1	1	1	0	0	0	1	1	0	0	3	0	0	0	0	1	1	0	0	1	0	0	0	0	0	0
O50401	3	32	1	0	1	1	1	7	6	2	0	1	3	9	9	0	1	1	1	3	4	0	2	1	3	2	2	2	2	5	5	4	2	0	1	0	0	0	2	3	0	0	6	8	0	0	4	5	0
O50402	9	23	15	16	14	0	19	15	11	15	9	34	18	6	6	2	24	0	0	2	3	0	13	14	6	3	10	2	1	8	8	6	1	9	4	0	1	1	6	5	0	0	2	2	1	0	8	8	0
O50405	3	29	9	7	8	0	12	13	8	7	2	8	15	16	15	1	8	0	0	8	14	4	11	10	12	3	6	5	6	13	12	12	8	9	8	4	3	0	6	8	1	1	11	13	2	6	9	11	1
O50406	0	27	2	0	1	0	1	0	0	1	1	1	0	1	1	1	1	0	0	2	1	0	0	0	2	1	1	0	0	0	0	0	1	0	0	0	0	0	0	1	0	0	1	1	0	0	0	0	0
O50407	0	0	0	0	0	0	0	0	0	0	0	0	0	0	0	0	0	0	0	0	0	0	0	0	0	0	0	0	0	0	0	0	0	0	0	0	0	0	0	0	0	0	0	0	0	0	0	0	0
O50408	4	13	9	5	4	0	6	10	1	5	4	7	7	4	4	5	5	2	2	3	4	3	3	6	4	5	7	3	5	5	5	6	3	3	5	3	3	2	4	6	2	2	4	4	2	3	15	14	1
O50410	6	22	5	2	4	2	6	8	4	4	4	8	4	4	4	2	7	2	2	3	4	1	2	2	2	2	2	2	2	2	2	2	2	2	2	1	1	1	2	2	2	2	2	2	2	2	3	2	0
O50411	0	0	0	0	0	0	0	0	0	0	0	0	0	0	0	0	0	0	0	0	0	0	0	0	0	0	0	0	0	0	0	0	0	0	0	0	0	0	0	1	0	0	1	1	0	0	0	0	0
O50412	0	0	0	0	0	0	0	0	0	0	0	0	0	0	0	0	0	0	0	0	0	0	0	0	1	0	0	0	0	0	0	0	0	0	0	0	0	0	0	0	0	0	0	0	0	0	0	0	0
O50413	0	0	0	0	1	0	0	0	0	0	0	0	0	0	0	1	0	0	0	0	10	1	1	0	0	0	3	0	0	0	0	1	0	0	0	3	0	3	0	0	0	0	2	6	0	0	1	0	0
O50414	0	0	0	0	1	0	0	0	0	0	0	0	0	0	0	2	0	0	0	0	10	0	5	0	0	0	5	0	0	0	1	1	0	0	3	2	0	2	0	0	0	0	5	4	0	0	1	0	0
O50416	6	27	19	8	12	4	25	14	7	12	8	31	3	11	12	1	24	1	1	11	6	2	5	5	1	4	4	3	2	3	2	5	1	6	3	3	3	0	2	2	0	0	6	4	3	1	10	10	0
O50417	46	79	61	49	51	1	90	67	39	44	26	76	58	10	6	1	65	1	0	7	29	3	27	31	24	7	37	3	9	16	16	64	5	24	8	3	5	1	21	20	2	2	21	26	1	2	36	32	0
O50418	3	7	0	2	0	0	3	3	2	0	1	0	3	2	2	0	0	0	0	1	0	1	0	0	0	1	0	0	0	2	2	3	0	0	0	0	0	0	0	0	0	0	3	3	0	0	2	3	0
O50419	3	7	5	3	6	0	10	4	3	4	4	10	6	4	3	1	8	0	0	0	4	3	4	2	2	2	3	1	1	3	1	5	1	2	2	2	1	0	2	3	0	0	0	0	0	1	3	3	0
O50422	0	0	0	0	0	0	0	0	0	0	0	0	0	0	0	0	0	0	0	0	4	1	7	3	2	1	2	8	2	11	10	31	3	2	2	14	3	1	2	0	0	0	3	5	1	1	9	8	1
O50423	0	0	0	0	0	0	0	0	0	0	0	0	1	0	0	0	0	0	0	0	30	2	13	33	12	6	3	6	3	16	15	28	2	20	6	17	6	0	12	12	0	0	11	11	5	0	22	25	0
O50426	1	4	1	0	1	0	1	3	1	1	0	1	2	1	1	1	1	1	1	1	0	1	0	1	4	4	0	0	0	0	0	1	0	0	0	0	0	0	1	0	0	0	0	1	0	0	4	3	0
O50427	0	0	0	0	0	0	0	0	0	0	0	0	0	0	0	0	0	0	0	0	0	0	0	0	0	0	0	0	0	0	0	0	0	0	0	0	0	0	0	0	0	0	0	0	0	0	0	0	0
O50429	2	4	3	0	2	0	3	4	2	1	2	4	4	5	3	1	1	0	0	2	4	0	4	3	10	6	2	4	4	6	4	2	4	3	3	9	6	1	5	5	2	1	6	5	11	6	3	5	0
O50430	0	0	0	0	0	0	0	0	0	0	0	0	0	0	0	0	0	0	0	0	0	0	0	0	0	0	0	0	0	0	0	0	0	0	0	0	0	0	0	0	0	0	0	0	0	0	0	0	0
O50431	1	9	2	12	1	0	1	1	1	2	7	2	3	1	1	1	2	0	0	2	7	3	5	11	4	4	4	2	3	8	6	6	1	9	5	3	6	0	3	4	0	0	4	5	4	2	4	6	0
O50432	0	0	0	0	0	0	0	0	0	0	0	0	0	0	0	0	0	0	0	0	4	3	0	2	19	1	1	0	0	0	0	0	0	1	0	6	4	0	0	0	0	0	2	2	0	0	9	4	0
O50433	1	4	1	2	1	0	2	2	2	1	1	1	1	2	1	0	1	1	1	1	3	0	6	4	10	4	7	4	6	12	8	3	1	3	13	19	17	1	14	14	2	2	5	5	2	4	3	3	0
O50434	5	37	15	7	7	0	15	7	3	8	10	15	13	9	8	0	13	0	0	6	9	1	13	13	12	7	9	5	5	12	8	13	10	9	9	15	11	1	12	12	2	1	11	12	5	7	12	14	0
O50435	8	22	21	13	23	5	31	17	6	16	11	40	11	15	13	6	29	1	2	14	6	2	3	4	2	4	2	6	3	4	3	2	3	6	4	4	3	1	7	9	2	1	12	14	2	4	6	8	1
O50436	4	5	4	5	6	3	8	6	2	3	3	2	9	7	11	1	2	0	0	1	4	1	3	4	3	2	1	1	1	4	4	6	2	3	2	1	1	1	3	1	1	1	13	14	1	1	2	2	0
O50437	14	17	25	11	28	3	34	11	6	18	11	26	15	13	15	1	16	0	0	5	14	2	7	11	10	6	9	3	4	7	6	22	3	9	8	4	2	2	12	10	2	2	21	25	2	2	17	15	0
O50438	0	0	0	2	0	0	0	0	0	0	0	0	0	1	1	0	0	0	0	0	6	0	5	3	0	1	0	0	0	2	4	5	0	3	0	0	0	0	0	0	0	0	10	15	0	0	0	1	0
O50440	0	0	0	0	0	0	0	0	0	0	0	0	0	0	0	0	0	0	0	0	0	0	0	0	0	0	0	0	0	0	0	0	0	0	0	0	0	0	0	0	0	0	0	0	0	0	0	0	0
O50442	0	0	0	0	0	0	0	0	0	0	0	0	0	0	0	0	0	0	0	0	0	0	0	1	0	2	0	1	1	1	1	1	0	0	0	3	2	0	0	0	0	0	0	0	0	0	12	8	0
O50443	11	20	26	19	19	1	31	19	8	18	11	35	27	6	6	0	45	0	0	9	5	2	13	25	10	10	11	3	2	12	10	21	1	7	4	3	3	0	3	3	1	1	5	5	1	2	32	27	0
O50444	1	2	2	1	1	0	3	2	1	3	1	7	2	1	1	0	5	0	0	1	1	0	1	1	1	1	1	1	0	1	1	1	1	0	1	0	0	0	0	0	1	1	1	1	0	0	1	1	0
O50445	0	1	0	0	0	0	0	0	0	0	0	0	0	0	0	0	0	0	0	0	5	2	6	2	28	12	3	2	2	3	4	12	5	2	2	16	14	0	19	21	0	0	3	2	1	7	17	10	0
O50451	0	0	0	0	0	0	0	0	0	0	0	0	0	0	0	0	0	0	0	0	0	0	0	0	0	1	0	0	0	0	0	0	0	0	0	0	0	0	0	0	0	0	1	1	0	0	1	1	0
O50452	0	0	0	0	0	0	0	0	0	0	0	0	0	0	0	0	0	0	0	0	5	14	7	3	3	9	5	9	12	12	12	74	0	0	2	11	3	0	4	5	0	0	11	10	1	3	47	43	3
O50453	0	0	0	0	0	0	0	0	0	0	0	0	0	0	0	0	0	0	0	0	6	18	11	4	2	11	8	9	12	13	13	87	0	3	3	10	2	0	5	7	0	1	12	11	1	3	55	45	4
O50454	2	1	4	6	2	0	1	1	0	3	1	2	3	1	1	0	6	0	0	0	20	16	30	19	19	12	23	20	18	31	27	108	10	8	15	42	29	3	15	15	2	2	32	29	6	7	32	30	6
O50455	0	13	0	0	0	1	0	0	0	0	1	0	0	2	0	2	0	0	0	4	2	0	2	2	1	1	0	1	1	2	2	2	1	2	0	0	1	0	1	2	0	0	1	1	1	2	1	2	0
O50456	0	0	0	0	0	0	0	0	0	0	0	0	0	0	0	0	0	0	0	0	0	0	0	0	0	0	0	0	0	0	0	0	0	0	0	0	0	0	0	0	0	0	0	0	0	0	0	0	0
O50457	0	0	0	0	0	0	0	0	0	0	0	0	0	0	0	0	0	0	0	0	0	0	0	0	0	0	0	0	0	0	0	0	0	0	0	0	0	0	0	0	0	0	0	0	0	0	0	0	0
O50459	0	0	0	0	0	0	0	0	0	0	0	0	0	0	0	0	0	0	0	0	1	0	0	0	0	0	0	0	0	0	0	1	0	0	0	0	0	0	0	1	0	0	1	1	0	0	2	1	0
O50460	41	89	67	50	57	2	120	63	35	51	27	82	64	10	9	2	70	1	1	9	27	4	24	32	25	6	38	3	9	17	16	62	4	25	8	3	5	1	19	19	2	2	21	26	1	4	36	32	0
O50461	0	0	0	0	0	0	0	0	0	0	0	0	0	0	0	0	0	0	0	0	1	0	0	0	0	0	0	0	0	0	0	1	0	0	0	0	0	0	0	0	0	0	3	2	0	1	1	1	0
O50462	0	0	0	0	0	0	0	0	0	0	0	0	0	0	0	0	0	0	0	0	5	0	1	1	1	0	0	0	0	0	0	1	0	0	2	0	0	0	0	0	0	0	3	1	0	0	1	0	0
O50463	11	16	11	8	15	0	15	17	7	9	6	16	11	8	6	4	18	3	3	4	1	1	3	4	3	5	4	3	3	4	3	5	3	3	4	1	0	2	4	4	3	4	1	1	0	1	6	8	1
O50464	0	0	0	0	0	0	0	0	0	0	0	0	0	0	0	0	0	0	0	0	0	0	0	0	0	0	0	0	0	0	0	0	0	0	0	0	0	0	0	0	0	0	0	0	0	0	1	1	0
O50465	29	25	30	37	22	0	43	47	25	26	9	36	30	13	10	1	34	0	0	31	3	0	23	34	14	9	17	4	6	22	13	25	5	5	4	3	0	0	12	8	1	1	3	4	2	5	43	40	0
O50466	9	16	11	11	14	1	20	19	7	11	11	32	16	14	15	8	20	3	3	5	2	2	0	0	0	0	1	0	0	1	0	0	0	2	0	1	0	0	1	2	0	0	1	2	1	1	1	1	0
O53146	17	49	27	14	25	4	34	17	5	19	12	35	12	11	12	1	27	0	0	21	14	0	8	11	14	6	13	2	6	6	5	24	3	7	6	4	1	0	14	18	1	1	14	12	1	3	20	22	0
O53147	0	0	0	0	0	0	0	0	0	0	0	0	0	0	0	0	0	0	0	0	0	0	0	0	1	0	0	1	1	0	0	0	0	0	0	0	0	0	0	0	0	0	0	0	0	0	0	0	0
O53148	0	0	0	0	0	0	0	0	0	0	0	0	0	0	0	0	0	0	0	0	1	0	1	0	1	1	0	0	0	0	0	1	0	1	1	0	0	0	1	1	0	0	1	1	1	0	1	1	0
O53149	12	16	17	4	14	0	14	15	4	12	6	30	9	1	1	0	34	0	0	0	22	13	22	14	21	17	24	14	17	24	22	84	14	6	11	41	26	5	22	25	1	1	34	33	5	7	34	30	4
O53150	0	0	0	0	0	0	0	0	0	0	0	0	0	0	0	0	0	0	0	0	1	0	0	0	0	0	0	0	0	0	0	0	0	0	0	0	0	0	0	1	0	0	0	0	0	0	2	1	0
O53151	0	0	0	0	0	0	0	0	0	0	0	0	0	0	0	0	0	0	0	0	1	0	0	0	0	2	0	0	0	1	1	0	0	0	0	0	0	0	0	0	0	0	1	2	0	0	1	2	0
O53153	0	3	0	0	0	0	0	0	0	0	0	0	0	2	2	2	0	0	0	0	2	2	0	0	0	2	2	0	0	0	0	2	2	2	2	0	0	2	2	2	0	0	2	2	0	2	2	2	0
O53154	4	28	15	24	11	0	22	9	6	10	7	17	9	4	4	0	15	2	2	2	21	12	27	15	13	5	22	20	16	29	26	113	12	6	14	42	23	10	11	16	4	3	37	35	5	6	33	30	5
O53156	1	3	4	1	2	1	4	1	1	1	1	3	1	1	1	1	1	1	1	2	1	1	1	1	2	1	1	1	1	1	1	1	0	0	2	1	1	0	2	2	1	1	1	2	1	1	1	1	1
O53157	0	1	0	0	0	0	0	0	0	0	0	0	0	1	1	1	0	0	0	0	1	0	0	1	1	4	2	0	0	0	0	1	1	1	2	0	0	1	3	2	0	0	1	1	0	1	3	3	0
O53158	12	10	23	26	16	0	29	18	11	15	10	32	18	5	5	0	19	0	0	1	4	1	21	23	5	4	12	0	0	5	4	11	0	22	3	1	3	0	8	10	0	0	2	1	0	0	9	9	0
O53161	16	73	28	30	24	10	43	25	19	24	16	35	33	28	26	5	30	6	7	8	7	2	5	2	3	3	4	2	3	5	5	2	3	6	3	1	2	1	9	10	1	1	11	8	1	6	8	6	1
O53163	9	25	16	16	16	0	21	16	12	15	9	35	16	6	6	2	23	0	0	3	3	0	13	14	6	3	10	2	1	8	8	6	1	9	4	0	1	1	6	5	0	0	2	2	1	0	8	8	0
O53164	7	12	13	15	5	1	14	17	7	7	9	19	9	18	16	2	22	1	1	7	22	14	22	19	15	16	23	26	23	29	27	70	9	14	22	33	24	9	21	23	3	2	39	36	4	15	37	31	3
O53165	0	0	0	0	0	0	0	0	0	0	0	0	1	0	0	0	0	0	0	0	30	2	11	44	14	7	5	5	4	17	16	29	2	21	6	17	7	0	14	13	0	0	10	11	5	3	25	26	0
O53166	2	10	3	2	6	0	6	9	4	3	3	4	3	2	2	1	4	1	1	4	3	0	4	5	4	3	3	2	3	3	3	3	3	5	5	6	0	0	4	4	1	1	3	3	3	4	3	3	0
O53167	0	0	0	0	0	0	0	0	0	0	0	0	0	0	0	0	0	0	0	0	0	0	0	0	0	0	0	0	0	0	0	0	0	0	0	0	0	0	0	0	0	0	0	0	0	0	0	0	0
O53168	0	0	0	0	0	0	0	0	0	0	0	0	0	0	0	0	0	0	0	0	1	0	2	0	1	5	0	2	2	2	2	2	0	1	0	4	1	0	1	0	0	0	1	1	0	1	3	3	0
O53169	0	0	0	0	0	0	0	0	0	0	0	0	0	0	0	0	0	0	0	0	1	0	2	0	1	5	0	2	2	2	2	1	0	1	0	4	2	0	1	0	0	0	1	1	0	1	4	3	0
O53173	0	0	0	0	0	0	0	0	0	0	0	0	0	0	0	0	0	0	0	0	0	0	0	0	0	0	0	0	0	0	0	0	0	0	0	0	0	0	0	0	0	0	0	0	0	0	1	0	0
O53174	1	11	3	3	0	0	1	3	1	1	1	3	0	3	3	1	2	1	1	3	3	1	4	3	4	3	2	2	2	2	2	3	2	4	4	5	6	2	4	2	2	1	5	5	3	2	2	2	0
O53176	8	17	15	11	7	2	15	13	9	7	12	21	6	5	4	0	11	0	0	3	16	0	2	7	7	1	6	0	4	5	3	8	1	5	2	0	1	0	5	7	2	2	12	14	0	1	5	9	0
O53177	0	0	0	0	0	0	0	0	0	0	0	0	0	0	0	0	0	0	0	0	0	0	0	0	0	2	0	0	0	0	0	0	0	0	0	0	0	0	0	0	0	0	0	0	0	0	1	2	0
O53178	0	0	0	0	0	0	0	0	0	0	0	0	0	0	0	0	0	0	0	0	0	0	0	0	0	0	0	0	0	0	0	0	0	0	0	0	0	0	0	0	0	0	0	0	0	0	0	0	0
O53179	0	0	0	0	0	0	0	0	0	0	0	0	0	0	0	0	0	0	0	0	0	0	0	0	0	0	0	0	0	0	0	0	0	0	0	0	0	0	0	0	0	0	0	0	0	0	0	0	0
O53181	1	2	1	2	1	0	0	1	1	1	1	1	4	2	2	0	1	0	0	2	4	0	4	4	6	4	6	2	2	5	3	4	3	2	3	11	9	1	7	8	0	0	5	5	3	3	9	8	1
O53182	0	0	0	0	0	0	0	0	0	0	0	0	0	0	0	0	0	0	0	0	1	1	0	1	6	4	0	0	0	2	1	0	1	0	2	14	13	0	7	9	0	0	2	2	4	2	0	0	0
O53183	14	12	10	6	6	0	14	12	6	7	4	15	7	3	2	1	10	0	0	15	2	0	17	18	5	6	16	3	4	14	14	15	2	2	1	1	0	0	9	6	1	1	2	4	2	4	31	26	0
O53185	1	5	3	2	4	0	7	3	2	3	1	5	9	1	1	0	3	0	0	3	2	0	1	2	2	1	1	1	1	2	2	2	1	1	1	1	1	0	2	2	0	0	1	1	0	1	1	1	0
O53186	41	46	40	51	28	0	61	66	33	34	12	49	48	15	14	1	42	0	0	34	3	0	25	34	14	10	22	6	6	21	15	24	4	5	4	3	0	0	12	9	1	1	4	4	3	6	51	56	0
O53189	1	3	0	0	0	0	0	3	1	0	0	0	0	1	1	0	0	0	0	0	1	1	1	1	1	1	1	1	1	1	1	1	1	1	1	1	1	1	1	1	1	1	1	1	1	1	1	1	1
O53190	0	1	4	10	1	1	2	0	0	2	2	3	6	1	1	0	1	1	1	0	1	2	0	3	13	1	1	0	0	1	1	6	1	1	0	2	1	1	3	2	0	0	2	1	0	0	6	4	0
O53193	0	0	0	0	0	0	0	0	0	0	0	0	0	0	0	0	0	0	0	0	0	0	0	1	0	1	0	0	0	0	0	1	0	0	0	0	0	0	0	0	0	0	0	0	0	0	2	2	0
O53195	0	0	0	0	0	0	0	0	0	0	0	0	0	0	0	0	0	0	0	0	0	0	1	0	0	1	0	0	0	0	0	0	0	0	0	0	0	0	0	0	0	0	0	0	0	0	0	0	0
O53196	0	1	0	0	0	0	0	0	0	0	0	0	0	1	1	0	0	0	0	0	4	0	1	0	2	2	1	0	1	0	0	1	0	1	1	0	0	0	10	22	0	0	8	8	0	0	7	4	0
O53198	14	8	5	4	2	1	9	17	7	5	4	4	3	5	5	0	4	0	0	7	6	8	6	0	10	7	3	2	4	8	8	6	3	0	1	2	0	0	9	6	0	0	8	6	1	0	11	16	0
O53199	0	0	0	0	0	0	0	0	0	0	0	0	0	0	0	0	0	0	0	0	0	0	0	0	0	0	0	0	0	0	0	0	0	0	0	0	0	0	0	0	0	0	0	0	0	0	0	0	0
O53200	0	0	0	0	0	0	0	0	0	0	0	0	0	0	0	0	0	0	0	0	0	0	0	0	0	0	0	0	0	0	0	0	0	0	0	0	0	0	0	0	0	0	0	0	0	0	0	0	0
O53201	0	0	0	0	0	0	0	0	0	0	0	0	0	0	0	0	0	0	0	0	0	0	0	0	0	0	0	0	0	0	0	0	0	0	0	0	0	0	0	0	0	0	0	0	0	0	1	1	0
O53202	0	7	2	0	0	0	2	0	0	0	2	2	2	3	3	0	2	0	0	0	2	1	3	5	2	1	1	1	1	4	3	3	2	6	1	1	0	0	4	3	0	0	3	3	1	2	3	3	0
O53203	2	6	2	1	1	0	7	3	2	2	2	3	3	0	0	3	1	1	1	3	1	1	1	2	2	1	1	1	1	2	2	1	1	2	2	2	1	1	2	2	1	1	2	2	0	1	1	2	0
O53204	7	6	5	9	7	1	14	16	6	5	7	8	7	19	16	2	7	1	0	5	22	14	27	19	18	9	24	24	27	31	29	85	13	12	12	34	34	8	20	20	2	0	36	39	3	17	35	31	5
O53205	1	0	1	1	1	0	1	1	1	1	0	2	2	1	1	1	1	0	0	1	3	2	3	1	1	2	1	1	1	1	1	1	1	1	1	2	3	1	1	1	1	1	3	3	1	1	3	4	9
O53206	0	0	0	0	0	0	0	0	0	0	0	0	0	0	0	0	0	0	0	0	0	0	0	0	0	0	0	0	0	0	0	0	0	0	0	0	0	0	0	0	0	0	0	0	0	0	0	0	0
O53207	8	10	11	8	11	1	11	11	7	9	5	16	8	2	2	3	12	1	2	1	4	2	3	2	4	2	2	2	2	5	5	2	2	6	2	2	1	2	6	6	1	1	3	5	2	3	4	5	1
O53208	13	22	16	14	16	3	16	15	11	14	10	23	12	6	5	4	16	2	2	2	4	3	7	12	7	2	4	3	3	8	8	4	4	12	5	4	3	2	13	13	1	1	5	5	2	5	6	7	1
O53209	2	13	0	0	0	1	0	1	1	0	1	0	4	1	1	0	0	0	0	0	1	0	2	1	1	1	0	0	0	1	1	1	0	2	0	0	0	0	1	1	0	0	0	0	0	0	0	0	0
O53210	55	34	40	47	44	2	58	70	34	34	16	76	27	3	4	1	109	0	0	2	8	1	7	6	18	5	7	0	5	2	2	8	2	6	2	0	1	0	4	6	0	0	2	3	0	0	8	9	0
O53213	24	160	43	41	36	1	75	48	19	39	37	82	82	2	4	0	55	0	0	2	71	0	3	4	17	4	1	2	1	5	4	6	1	9	3	5	2	5	5	8	0	0	47	46	1	1	16	15	0
O53214	0	0	0	0	0	0	0	0	0	0	0	0	0	0	0	0	0	0	0	0	0	0	0	0	0	0	0	0	0	0	0	0	0	0	0	0	0	0	0	0	0	0	0	0	0	0	0	0	0
O53216	0	14	0	0	0	0	0	0	0	0	1	0	4	2	2	0	0	0	0	1	2	0	3	3	4	3	2	3	2	1	1	3	2	2	2	2	1	0	1	3	1	1	3	2	2	2	3	3	0
O53217	0	0	0	0	0	0	0	0	0	0	0	0	0	0	0	0	0	0	0	0	0	0	0	0	0	0	0	0	0	0	0	0	0	0	0	0	0	0	0	0	0	0	0	0	0	0	0	0	0
O53218	0	0	0	0	0	0	0	0	0	0	0	0	0	0	0	0	0	0	0	0	0	0	0	0	0	0	0	0	0	0	0	0	0	0	0	0	0	0	0	0	0	0	0	0	0	0	0	0	0
O53219	0	0	0	0	0	0	0	0	0	0	0	0	0	0	0	0	0	0	0	0	0	0	0	0	0	0	0	0	0	0	0	0	0	0	0	0	0	0	0	0	0	0	0	0	0	0	0	0	0
O53221	0	0	0	0	0	0	0	0	0	0	0	0	0	0	0	0	0	0	0	0	0	0	0	0	0	0	0	0	0	0	0	0	0	0	0	0	0	0	0	0	0	0	0	0	0	0	0	0	0
O53222	0	0	0	0	0	0	0	0	0	0	0	0	0	0	0	0	0	0	0	0	0	0	0	0	0	0	0	0	0	0	0	0	0	0	0	0	0	0	0	0	0	0	0	0	0	0	0	0	0
O53223	0	0	0	0	0	0	0	0	0	0	0	0	0	0	0	0	0	0	0	0	2	0	1	1	2	1	0	0	0	4	4	9	7	1	2	3	1	0	2	0	0	0	3	3	0	0	1	2	0
O53225	0	0	0	0	0	0	0	0	0	0	0	0	0	0	0	0	0	0	0	0	0	0	0	0	0	0	0	0	0	0	0	0	0	0	0	0	0	0	0	0	0	0	0	0	0	0	0	0	0
O53226	7	11	9	4	8	1	9	14	5	6	7	22	5	5	3	4	13	3	3	4	12	1	4	3	11	2	6	3	4	8	6	5	1	7	8	8	3	2	8	8	2	2	10	10	6	4	6	5	0
O53227	2	5	6	8	4	0	9	10	4	4	4	6	3	1	1	0	8	0	0	3	0	1	8	1	5	3	6	2	2	4	2	4	1	2	4	5	1	1	4	4	1	0	0	0	1	1	3	4	1
O53231	1	3	1	0	1	0	1	1	1	1	1	1	2	4	4	1	2	0	0	1	1	0	1	1	1	1	1	1	1	1	1	1	0	1	1	0	0	0	1	1	1	1	1	1	1	1	1	1	0
O53232	9	26	16	16	15	0	20	16	12	15	9	35	17	6	6	1	23	0	0	2	3	0	13	14	6	3	10	2	1	8	8	6	1	9	4	0	1	1	5	5	0	0	2	2	1	0	8	8	0
O53237	2	6	3	2	6	0	4	9	4	3	3	4	3	2	2	1	4	1	1	4	2	0	3	4	3	2	2	1	2	2	2	3	2	4	4	4	0	0	3	3	1	1	2	2	2	3	2	2	0
O53238	0	0	0	0	0	0	0	0	0	0	0	0	0	0	0	0	0	0	0	0	0	0	10	8	0	2	3	1	2	0	0	8	0	0	1	3	0	0	0	0	0	0	1	1	2	0	21	24	0
O53239	0	0	0	0	0	0	0	0	0	0	0	0	0	0	0	0	0	0	0	0	0	0	0	0	0	0	0	0	0	0	0	0	0	0	0	0	0	0	0	0	0	0	0	0	0	0	0	0	0
O53240	1	7	1	1	0	0	1	3	1	1	1	0	1	0	0	0	1	0	0	1	2	0	2	0	2	3	1	2	1	2	2	3	2	1	1	3	4	0	4	3	1	1	5	6	0	3	3	5	0
O53242	3	6	3	2	3	0	4	6	2	4	3	5	4	1	1	0	3	0	0	1	0	0	7	3	3	2	4	0	0	1	1	4	1	1	1	2	0	0	2	2	0	0	1	1	0	1	7	7	0
O53244	2	26	8	3	5	0	11	2	1	6	5	14	5	8	9	1	8	0	0	1	10	2	4	4	7	5	3	0	1	5	4	9	1	2	3	2	3	1	7	9	1	0	15	12	4	0	10	13	0
O53245	0	0	0	0	0	0	0	0	0	0	0	0	0	0	0	0	0	0	0	0	0	0	0	0	0	0	0	0	0	0	0	0	0	0	0	0	0	0	0	0	0	0	0	0	0	0	0	0	0
O53246	0	0	0	0	0	0	0	0	0	0	0	0	0	0	0	0	0	0	0	0	0	0	0	0	1	0	0	0	0	0	0	0	0	0	0	0	0	0	0	0	0	0	0	0	0	0	0	1	0
O53247	20	45	65	38	29	5	37	54	15	23	16	51	43	8	8	6	64	3	3	10	24	19	20	12	9	9	20	18	17	33	28	85	6	4	17	25	25	11	13	17	4	3	42	39	5	10	28	31	5
O53252	0	0	0	0	0	0	0	0	0	0	0	0	0	0	0	0	0	0	0	0	6	0	0	1	8	2	3	1	1	2	2	4	2	1	1	0	0	0	3	3	0	0	1	1	0	1	2	1	0
O53253	0	3	3	0	3	0	4	0	0	3	4	5	1	0	0	0	6	0	0	0	2	0	1	3	0	0	0	0	0	0	1	1	0	0	2	0	0	0	1	1	0	0	0	1	0	0	1	1	0
O53254	0	0	0	0	0	0	0	0	0	0	0	0	0	2	2	0	0	0	0	0	3	0	4	5	0	0	2	2	0	0	0	10	2	1	0	2	0	0	0	1	1	1	6	6	1	1	7	4	0
O53255	0	0	0	0	0	0	0	0	0	0	0	0	0	0	0	0	0	0	0	0	0	0	0	0	0	0	0	0	0	0	0	0	0	0	0	0	0	0	0	0	0	0	0	0	0	0	0	0	0
O53258	5	9	6	9	6	0	4	10	6	3	1	3	10	3	5	1	5	1	1	3	2	0	6	4	6	2	8	0	0	1	1	4	1	5	3	1	0	1	4	3	1	1	4	3	1	1	6	4	0
O53260	0	0	0	0	0	0	0	0	0	0	0	0	0	0	0	0	0	0	0	0	1	0	0	0	0	2	0	0	0	0	0	0	0	0	0	0	0	0	0	0	0	0	1	1	0	0	1	1	0
O53262	0	0	0	0	0	0	0	0	0	0	0	0	0	0	0	0	0	0	0	0	0	0	0	0	0	1	0	0	0	0	0	0	0	0	0	0	0	0	0	0	0	0	0	0	0	0	1	1	0
O53263	0	0	0	0	0	0	0	0	0	0	0	0	0	0	0	0	0	0	0	0	0	0	0	0	0	0	0	0	0	0	0	0	0	0	0	0	0	0	0	0	0	0	0	0	0	0	0	0	0
O53268	0	0	0	0	0	0	0	0	0	0	0	0	0	0	0	0	0	0	0	0	0	0	0	0	0	0	0	0	0	0	0	0	0	0	0	0	0	0	0	0	0	0	0	0	0	0	0	0	0
O53272	6	6	5	7	5	1	5	4	3	5	10	15	10	5	5	2	11	2	2	2	6	1	5	6	6	2	2	2	2	5	5	4	2	4	3	8	6	2	6	6	2	2	8	10	3	4	7	7	1
O53273	7	18	13	12	12	3	14	10	7	10	8	20	10	3	3	2	14	1	1	1	3	2	4	5	4	2	2	1	2	5	5	2	2	8	2	2	1	1	10	9	1	1	4	4	2	3	4	5	1
O53274	0	0	0	0	0	0	0	0	0	0	0	0	0	0	0	0	0	0	0	0	0	0	2	1	0	0	1	0	0	2	1	2	1	1	1	0	0	0	0	0	0	0	1	1	0	1	0	0	0
O53275	1	1	1	1	2	0	1	2	1	1	1	3	1	0	0	0	1	0	0	1	0	1	2	1	2	1	2	0	0	1	1	1	0	1	0	5	3	0	1	2	0	0	0	0	1	0	1	1	0
O53277	19	95	42	27	27	5	48	24	17	33	31	59	43	46	41	8	44	6	7	11	68	1	21	11	25	4	23	10	6	20	17	27	6	18	21	15	14	2	33	35	7	4	35	35	12	7	16	23	0
O53278	0	0	0	0	0	0	0	0	0	0	0	0	0	0	0	0	0	0	0	0	4	0	0	0	2	0	0	0	0	0	0	0	1	0	1	0	0	0	3	3	0	0	4	4	1	0	0	0	0
O53279	6	41	10	5	4	3	9	7	4	6	15	12	9	16	15	1	9	1	1	5	50	5	15	3	17	16	27	2	7	6	7	19	15	8	14	6	0	0	22	27	0	0	53	46	8	7	19	16	0
O53280	0	0	0	0	0	0	0	0	0	0	0	0	0	0	0	0	0	0	0	0	1	0	0	0	0	0	0	0	0	0	0	0	0	0	0	0	0	0	0	0	0	0	0	0	0	0	0	0	0
O53281	2	17	3	1	2	2	2	3	2	1	0	1	7	4	5	1	1	0	0	2	14	2	8	11	9	4	6	6	8	12	11	16	9	9	6	8	4	4	7	6	2	1	11	12	5	8	8	6	0
O53282	0	1	1	0	1	0	1	0	0	1	4	2	3	0	1	0	1	0	0	0	17	0	1	1	1	0	2	0	0	1	1	0	0	1	1	0	0	0	2	2	1	1	13	11	0	0	1	0	0
O53283	0	0	0	0	0	0	0	0	0	0	0	0	0	0	0	0	0	0	0	0	1	0	0	2	0	0	0	1	1	0	0	0	0	1	0	0	2	0	0	0	0	0	0	0	0	0	0	0	0
O53284	1	2	1	2	4	1	1	1	1	1	2	2	1	1	0	0	1	1	1	1	0	0	0	0	0	0	0	0	0	0	0	0	1	0	0	0	1	0	0	0	0	0	0	0	1	0	1	1	0
O53285	13	53	28	22	15	2	37	20	16	19	25	48	34	34	33	3	30	3	3	10	56	1	16	12	23	3	17	11	6	15	12	25	5	18	24	15	11	3	31	28	6	4	32	33	9	4	11	18	0
O53286	9	24	16	16	15	0	20	16	12	15	9	35	16	6	6	0	23	0	0	2	3	0	13	14	6	3	9	2	1	8	8	6	1	9	3	0	1	1	5	4	0	0	2	2	1	0	8	8	0
O53287	2	0	2	1	2	0	1	5	1	1	0	2	1	0	0	0	1	0	0	0	0	0	1	0	0	1	1	0	0	0	0	1	0	0	0	0	0	0	1	1	0	0	0	0	0	0	2	1	0
O53288	0	3	0	0	0	0	1	0	0	0	0	0	3	1	1	0	0	0	0	0	21	8	24	17	16	15	23	17	21	31	29	103	16	10	21	32	26	4	16	18	1	1	34	36	5	4	33	26	5
O53289	4	38	17	19	20	0	27	10	4	12	8	24	11	14	13	4	25	1	1	11	7	9	8	10	7	3	8	7	9	12	11	8	10	7	9	11	8	0	9	11	0	0	14	19	4	6	13	15	4
O53291	0	0	0	0	0	0	0	0	0	0	0	0	0	0	0	0	0	0	0	0	13	1	2	2	1	0	0	4	4	4	6	8	1	1	1	2	11	0	2	2	0	0	23	6	0	1	4	1	0
O53292	0	0	0	0	0	0	0	0	0	0	0	0	0	0	0	0	0	0	0	0	0	0	0	0	0	0	0	0	0	0	0	0	0	0	0	0	0	0	0	0	0	0	0	0	0	0	0	0	0
O53293	0	0	0	0	0	0	0	0	0	0	0	0	0	0	0	0	0	0	0	0	0	0	0	0	0	0	0	0	0	0	0	0	0	0	0	0	0	0	0	0	0	0	0	0	0	0	0	0	0
O53294	6	40	15	10	10	0	16	11	3	10	9	32	7	5	7	3	19	0	0	3	11	3	6	10	6	2	6	1	2	2	5	8	1	11	3	1	2	2	5	7	1	1	6	1	3	2	13	14	0
O53295	0	0	0	0	0	0	0	0	0	0	0	0	1	0	0	0	0	0	0	0	26	2	13	28	12	5	5	5	3	16	13	27	2	20	6	14	5	0	13	10	0	0	11	10	5	0	24	26	0
O53298	0	0	0	0	0	0	0	0	0	0	0	0	0	0	0	0	0	0	0	0	0	0	0	0	0	0	0	0	0	0	0	0	0	0	0	0	0	0	0	0	0	0	0	0	0	0	0	1	0
O53300	7	36	14	8	9	0	14	8	3	7	6	26	6	3	5	1	15	0	0	1	8	2	3	10	5	1	5	1	1	2	5	6	1	11	1	0	0	2	2	3	1	1	3	3	2	2	10	11	0
O53301	1	21	7	5	11	0	9	4	1	6	4	21	3	0	0	0	25	0	0	0	4	1	3	4	4	0	4	0	2	0	1	2	0	5	0	0	0	0	0	0	0	0	1	2	0	0	3	2	0
O53302	40	88	66	56	54	2	117	64	36	50	27	79	64	10	10	2	70	1	2	9	27	4	25	31	25	7	38	3	9	17	17	62	4	24	8	3	5	1	19	19	2	2	21	26	1	4	36	33	0
O53303	13	37	23	12	23	3	30	16	5	18	10	30	11	7	8	0	23	0	0	16	14	0	7	11	14	7	10	2	6	6	5	25	3	6	5	5	2	0	13	17	1	1	13	13	1	2	21	25	0
O53304	2	13	0	0	0	1	0	1	1	0	1	0	4	1	1	0	0	0	0	0	3	0	3	1	1	1	0	0	0	2	3	4	0	4	0	0	0	0	1	1	0	0	3	3	0	0	0	0	0
O53306	23	56	38	34	32	4	53	46	19	30	13	82	48	12	15	6	48	4	4	9	15	0	18	15	9	5	13	3	2	14	16	12	2	12	12	0	0	1	15	15	0	0	15	23	3	3	17	20	0
O53307	2	11	5	1	3	0	4	3	0	2	0	6	2	0	3	1	5	0	0	0	10	0	5	5	6	5	11	0	0	4	4	7	3	2	8	4	0	3	9	9	4	5	10	10	7	3	2	5	0
O53310	0	0	0	0	0	0	0	0	0	0	0	0	1	0	0	0	0	0	0	0	30	2	12	45	14	6	4	6	4	17	16	29	2	21	7	17	7	0	14	14	0	0	12	11	5	3	25	27	0
O53311	1	7	2	1	3	0	5	3	0	1	0	3	1	5	4	0	3	0	0	0	11	0	5	7	3	1	2	0	0	0	0	2	0	2	3	0	1	0	1	1	0	0	7	6	0	0	3	4	0
O53312	0	0	0	0	0	0	0	0	0	0	0	0	0	0	0	0	0	0	0	0	0	0	0	0	0	0	0	0	0	0	0	0	0	0	0	0	0	0	0	0	0	0	0	0	0	0	0	0	0
O53313	0	0	0	0	0	0	0	0	0	0	0	0	0	0	0	0	0	0	0	0	3	0	2	0	1	2	1	0	0	2	2	1	3	2	1	0	1	0	1	1	0	0	2	2	1	0	4	4	0
O53314	15	49	27	21	23	8	32	33	19	22	15	30	15	26	24	13	27	12	14	13	17	3	15	8	19	10	14	3	5	15	13	10	10	12	17	16	19	6	23	29	6	6	16	18	10	4	12	12	1
O53315	0	0	0	0	0	0	0	0	0	0	0	0	0	0	0	0	0	0	0	0	0	0	0	0	0	0	0	0	0	0	0	0	0	0	0	0	0	0	0	0	0	0	0	0	0	0	0	0	0
O53316	0	0	0	0	0	0	0	0	0	0	0	0	0	0	0	0	0	0	0	0	0	0	0	0	0	0	0	0	0	0	0	0	0	0	0	0	0	0	0	0	0	0	0	0	0	0	0	0	0
O53317	0	0	0	0	0	0	0	0	0	0	0	0	1	0	0	0	0	0	0	0	24	1	11	27	10	5	4	4	2	13	12	24	1	17	6	13	5	0	12	14	0	0	9	10	4	0	18	23	0
O53318	4	5	4	4	3	0	2	1	1	3	3	7	4	3	2	0	4	0	1	0	2	1	2	3	0	1	1	0	1	0	0	2	0	2	0	2	2	0	2	2	0	0	2	2	0	0	2	2	0
O53319	0	0	0	0	0	0	0	0	0	0	0	0	0	0	0	0	0	0	0	0	0	0	0	0	0	0	0	0	0	0	0	0	0	0	0	0	0	0	0	1	0	0	0	0	0	0	0	0	0
O53321	16	111	23	14	19	3	40	28	11	25	16	40	16	22	22	2	26	1	1	8	24	3	15	16	18	4	13	2	5	14	12	27	2	22	10	4	4	1	16	22	1	1	22	27	2	3	25	22	0
O53322	0	0	0	0	0	0	0	0	0	0	0	0	0	0	0	0	0	0	0	0	0	0	0	0	0	0	0	0	0	0	0	0	0	0	0	0	0	0	0	0	0	0	0	0	0	0	0	0	0
O53323	0	0	0	0	0	0	0	0	0	0	0	0	1	0	0	0	0	0	0	0	30	2	10	41	12	5	5	4	4	16	14	29	2	19	6	17	6	0	13	12	0	0	10	11	4	2	21	23	0
O53324	41	87	67	61	61	3	122	64	36	47	29	76	72	9	9	2	70	2	2	11	30	4	26	31	25	6	35	3	9	17	17	63	4	23	9	3	5	1	19	18	2	2	21	26	1	3	36	32	0
O53325	5	9	6	10	6	0	4	10	6	3	1	3	7	3	5	1	5	1	1	3	2	0	6	4	6	2	8	0	0	1	1	4	1	5	2	1	0	1	4	3	1	1	4	3	1	1	6	4	0
O53327	15	100	27	12	19	3	47	31	11	22	16	50	19	21	20	6	39	1	1	4	25	3	19	15	19	4	13	2	5	11	12	27	2	21	10	4	4	1	18	21	1	2	22	27	2	3	27	20	0
O53328	0	0	0	0	0	0	0	0	0	0	0	0	0	0	0	0	0	0	0	0	0	0	0	0	0	0	0	0	0	0	0	0	0	0	0	0	0	0	0	0	0	0	0	0	0	0	0	0	0
O53329	0	1	0	0	1	0	0	0	0	0	0	0	0	0	0	0	0	0	0	1	2	1	1	1	0	1	1	3	5	0	0	1	3	1	2	0	1	5	1	1	0	0	0	1	0	2	0	0	0
O53330	0	0	0	0	0	0	0	0	0	0	0	0	0	0	0	0	0	0	0	0	0	0	0	0	0	0	0	0	0	0	0	0	0	0	0	0	0	0	0	0	0	0	0	1	0	0	0	0	0
O53331	0	0	0	0	0	0	0	0	0	0	0	0	0	0	0	0	0	0	0	0	0	0	0	0	0	0	0	0	0	0	0	0	0	0	0	0	0	0	0	0	0	0	0	0	0	0	0	0	0
O53332	0	0	0	0	0	0	0	0	0	0	0	0	0	0	0	0	0	0	0	0	2	0	0	0	0	0	0	0	0	0	0	0	0	0	0	1	0	0	1	1	0	0	1	1	0	0	0	0	0
O53333	0	0	0	0	0	0	0	0	0	0	0	0	0	0	0	0	0	0	0	0	1	0	0	0	0	0	0	1	0	0	0	0	0	0	0	1	0	0	1	1	0	0	1	0	0	0	0	0	0
O53334	0	0	0	0	0	0	0	0	0	0	0	0	0	0	0	0	0	0	0	0	0	0	0	0	0	0	0	0	0	0	0	0	0	0	0	0	0	0	0	0	0	0	0	0	0	0	0	0	0
O53335	0	0	0	0	0	0	0	0	0	0	0	0	0	0	0	0	0	0	0	0	0	0	0	0	0	0	0	0	0	0	0	0	0	0	0	0	0	0	0	0	0	0	0	0	0	0	0	0	0
O53336	0	0	0	0	0	0	0	0	0	0	0	0	0	0	0	0	0	0	0	0	0	0	0	0	1	0	0	0	0	0	0	0	0	0	0	0	0	0	1	0	0	0	0	0	0	0	0	0	0
O53337	0	108	4	1	11	0	119	2	0	8	0	3	0	0	0	0	0	0	0	2	0	0	0	4	0	0	4	2	0	0	1	2	0	0	0	0	2	4	1	0	0	0	0	0	0	0	1	2	0
O53338	0	0	0	0	0	0	0	0	0	0	0	0	0	0	0	0	0	0	0	0	1	1	4	6	0	2	1	1	0	1	1	24	0	1	0	0	0	0	0	0	0	0	2	7	0	0	14	12	0
O53339	0	0	0	0	0	0	0	0	0	0	0	0	0	0	0	0	0	0	0	0	1	0	0	0	0	0	0	0	0	0	0	0	0	0	0	1	0	0	0	0	0	0	2	1	0	0	1	1	0
O53340	1	4	2	7	2	0	4	2	1	2	1	5	1	1	1	1	3	1	1	1	4	3	4	4	6	1	3	3	3	4	4	3	1	6	4	6	8	3	4	4	2	2	5	5	4	2	3	3	1
O53341	0	0	0	0	0	0	0	0	0	0	0	0	0	0	0	0	0	0	0	0	0	0	0	0	0	2	0	0	0	0	0	0	0	0	0	0	0	0	0	0	0	0	0	0	0	0	2	2	0
O53342	0	0	0	0	0	0	0	0	0	0	0	0	0	0	0	0	0	0	0	0	0	0	0	0	0	1	0	0	0	0	0	0	0	0	0	0	0	0	0	0	0	0	0	0	0	0	0	1	0
O53343	6	25	8	3	7	2	13	3	3	8	5	22	4	20	23	3	13	3	3	3	9	0	1	4	5	2	1	1	0	1	1	1	0	5	1	1	0	0	1	3	1	1	10	13	0	1	1	1	0
O53345	3	12	14	8	12	0	25	9	3	14	6	27	9	7	8	0	16	1	1	2	8	4	7	7	5	5	3	6	6	12	11	10	4	8	7	4	6	4	5	4	0	0	5	5	2	3	11	11	1
O53346	22	16	62	68	61	1	89	33	13	46	7	97	77	7	9	2	87	1	0	1	8	1	4	5	5	2	2	4	2	8	7	3	5	5	2	6	3	1	0	2	1	1	8	8	5	3	4	5	0
O53347	0	1	4	0	1	1	0	0	0	1	2	1	1	1	1	2	1	0	0	2	6	3	7	3	3	5	5	4	3	3	3	5	3	4	3	3	5	2	10	7	2	2	3	2	1	3	4	4	3
O53348	0	1	5	0	1	1	1	0	0	1	2	4	2	1	1	1	2	0	0	2	10	3	8	4	3	5	5	4	4	3	4	5	4	4	4	5	5	2	11	8	2	2	3	2	1	3	5	4	3
O53351	0	0	0	0	0	0	0	0	0	0	0	0	0	0	0	0	0	0	0	0	0	0	0	0	0	1	0	0	0	0	0	0	0	0	0	0	0	0	0	0	0	0	0	0	0	0	1	1	0
O53352	0	0	0	0	0	0	0	0	0	0	0	0	0	0	0	0	0	0	0	0	0	0	0	0	0	2	0	0	0	0	0	1	0	0	0	0	0	0	1	2	0	0	0	0	0	0	2	2	0
O53353	0	0	0	0	0	0	0	0	0	0	0	0	0	0	0	0	0	0	0	0	0	0	0	0	0	4	0	0	0	0	0	0	0	0	0	0	0	0	0	0	0	0	0	0	0	0	3	2	0
O53355	6	27	12	8	12	2	18	10	5	9	10	22	17	9	8	5	18	4	4	8	11	8	11	17	7	12	7	4	4	14	13	9	2	15	12	6	10	2	11	12	3	3	13	13	5	5	20	19	2
O53356	2	1	2	1	3	0	4	2	2	3	1	4	2	1	1	0	3	0	0	0	1	0	0	0	0	0	0	0	0	0	0	0	0	1	1	0	0	0	1	0	0	0	1	1	0	0	0	0	0
O53360	2	5	5	4	11	1	6	9	4	5	2	7	5	2	2	2	6	0	0	4	5	3	2	3	3	3	2	3	2	3	2	3	1	3	2	2	1	1	3	3	1	0	4	4	3	3	4	5	0
O53361	0	6	0	0	0	0	0	0	0	0	0	0	0	0	0	0	0	0	0	0	0	0	2	2	10	1	3	0	0	0	0	0	0	0	0	0	0	0	1	0	0	0	1	0	0	0	1	1	0
O53362	0	0	0	0	0	0	0	0	0	0	0	0	0	0	0	0	0	0	0	0	0	0	0	0	0	0	0	0	0	0	0	0	0	0	0	0	0	0	0	0	0	0	0	0	0	0	0	0	0
O53363	22	115	28	15	21	4	44	45	16	25	15	48	21	21	21	5	29	1	2	9	27	3	17	18	18	4	13	2	5	13	13	27	2	23	11	4	4	1	15	20	2	4	23	27	2	3	25	25	0
O53366	0	1	0	0	0	0	1	0	0	1	1	1	1	1	1	0	1	0	0	1	2	1	2	2	1	1	1	1	1	2	2	2	1	2	2	2	1	0	2	2	0	0	3	2	2	2	2	2	0
O53367	1	9	1	2	2	0	3	4	3	1	1	1	1	1	1	0	1	0	0	1	1	1	0	0	0	0	0	1	1	1	1	1	0	0	0	1	1	0	1	1	0	0	0	0	0	0	1	1	0
O53368	0	0	0	0	0	0	0	0	0	0	0	0	0	0	0	0	0	0	0	0	0	0	0	0	0	0	0	0	0	1	1	0	0	1	0	0	0	0	0	0	0	0	0	0	0	0	1	1	0
O53369	0	0	0	0	0	0	0	0	0	0	0	0	0	0	0	0	0	0	0	0	0	0	0	0	0	0	0	0	0	0	0	0	0	0	0	0	0	0	0	0	0	0	0	0	0	0	2	2	0
O53370	1	3	1	3	2	0	2	2	2	1	3	1	2	4	4	1	2	1	1	4	2	0	2	3	3	2	3	2	1	3	3	2	2	2	2	12	6	0	4	3	1	2	2	5	2	2	3	4	0
O53371	1	3	1	1	1	0	1	3	2	1	1	1	2	2	2	1	1	1	1	1	2	1	2	1	4	2	5	3	4	5	3	2	2	1	5	3	6	0	7	5	1	1	2	2	5	4	1	3	0
O53372	0	0	0	0	0	0	0	0	0	0	0	0	0	0	0	0	0	0	0	0	0	0	0	0	0	0	0	0	0	0	0	0	0	0	0	0	0	0	0	0	0	0	0	0	0	0	0	0	0
O53373	0	0	0	0	0	0	0	0	0	0	0	0	0	0	0	0	0	0	0	0	0	0	0	0	0	0	0	0	0	0	0	0	0	0	0	0	0	0	0	0	0	0	0	0	0	0	0	0	0
O53374	15	67	31	21	21	3	39	21	16	24	27	52	44	34	35	3	42	3	3	8	55	1	14	11	22	3	15	12	9	17	16	22	6	19	21	14	10	2	29	26	6	4	30	32	8	3	11	18	0
O53377	0	0	1	0	1	0	0	0	0	0	0	0	1	0	0	0	0	0	0	0	6	0	3	1	10	3	18	1	1	3	4	5	0	0	1	3	0	8	1	2	0	0	3	1	0	0	3	6	0
O53378	0	0	0	0	0	0	0	0	0	0	0	0	0	0	0	0	0	0	0	0	5	2	6	2	27	11	3	2	2	3	4	12	4	2	2	15	11	0	18	18	0	0	2	1	0	7	17	10	0
O53379	5	9	6	7	11	0	6	8	2	5	3	12	5	4	4	1	8	0	0	4	4	0	8	8	9	7	6	4	3	7	6	12	3	5	5	6	2	0	4	4	2	2	5	7	3	4	8	5	0
O53380	0	0	0	0	0	0	0	0	0	0	0	0	0	0	0	0	0	0	0	0	1	0	3	3	0	1	2	2	2	3	3	5	2	1	2	4	4	0	0	0	1	1	2	2	0	1	0	0	0
O53381	50	75	45	51	43	1	71	77	38	37	9	53	57	11	9	1	55	3	3	38	0	0	6	15	8	2	12	0	3	0	0	9	1	0	0	0	0	0	3	3	1	1	0	0	0	0	18	18	0
O53382	1	0	1	1	2	0	1	1	1	1	1	2	1	0	0	0	2	0	0	0	1	0	0	0	4	1	2	1	1	3	1	5	1	2	0	7	4	0	0	0	0	0	2	1	0	0	2	4	0
O53383	0	0	0	0	0	0	0	0	0	0	0	0	0	0	0	0	0	0	0	0	0	0	0	0	0	0	0	0	0	0	0	0	0	0	0	0	0	0	0	0	0	0	0	0	0	0	0	0	0
O53384	0	0	0	0	0	0	0	0	0	0	0	0	0	0	0	0	0	0	0	0	4	0	5	8	6	3	5	2	5	8	9	8	3	7	1	10	11	0	1	1	0	0	5	2	1	2	8	8	0
O53385	0	0	0	0	0	0	0	0	0	0	0	0	0	0	0	0	0	0	0	0	1	0	3	1	3	2	1	1	1	1	1	1	0	2	1	1	0	1	2	3	1	1	2	2	0	1	2	2	0
O53387	0	4	1	0	1	0	1	0	0	1	0	2	0	0	1	0	2	0	0	0	1	0	0	1	3	1	1	0	0	1	0	4	0	2	1	0	0	0	1	3	0	0	3	2	0	0	1	1	0
O53388	7	60	16	7	9	0	19	9	4	13	7	25	10	12	12	0	21	0	0	1	20	2	10	9	11	3	7	2	2	8	7	20	2	15	5	3	3	1	12	15	0	1	19	24	1	0	17	16	0
O53390	3	11	5	6	2	0	8	3	2	1	5	3	7	5	6	0	2	0	0	8	2	0	7	3	16	4	7	4	5	5	4	8	4	2	4	7	3	0	8	8	1	0	4	7	0	5	6	6	0
O53397	0	0	0	0	0	0	0	0	0	0	0	0	0	0	0	0	0	0	0	0	2	3	8	4	5	9	7	0	2	7	6	19	5	3	2	8	5	0	6	2	0	0	3	2	0	3	22	15	0
O53398	39	84	64	52	56	3	108	64	35	47	27	76	65	10	9	2	68	2	2	8	28	4	25	31	24	7	37	3	9	17	16	63	5	25	8	3	5	1	19	20	2	2	22	27	1	4	36	32	0
O53399	0	0	0	0	0	0	0	0	0	0	0	0	0	0	0	0	0	0	0	0	0	0	1	0	0	0	0	0	0	0	0	0	0	0	0	0	0	0	1	1	0	0	0	0	0	0	0	0	0
O53400	0	0	0	0	0	0	0	0	0	0	0	0	0	0	0	0	0	0	0	0	0	0	0	0	0	0	0	0	0	0	0	0	0	0	0	0	0	0	0	0	0	0	0	0	0	0	0	0	0
O53401	0	0	0	0	0	0	0	0	0	0	0	0	0	0	0	0	0	0	0	0	0	0	0	0	0	0	0	0	0	0	0	0	0	0	0	0	0	0	0	0	0	0	0	0	0	0	0	0	0
O53402	0	0	0	0	0	0	0	0	0	0	0	0	0	0	0	0	0	0	0	0	0	0	0	0	0	0	0	0	0	0	0	0	0	0	0	0	0	0	0	0	0	0	0	0	0	0	0	0	0
O53403	0	0	0	0	0	0	0	0	0	0	0	0	0	0	0	0	0	0	0	0	0	0	0	0	0	0	0	0	0	0	0	0	0	0	0	0	0	0	0	0	0	0	0	0	0	0	0	0	0
O53404	0	0	0	0	0	0	0	0	0	0	0	0	0	0	0	0	0	0	0	0	2	0	1	0	0	0	0	0	0	0	0	0	0	0	0	0	0	0	0	0	0	0	2	2	0	0	1	2	0
O53405	43	64	81	24	75	5	117	54	31	67	50	147	64	34	26	2	99	6	5	13	39	1	2	1	21	1	3	0	0	2	2	0	1	1	0	2	2	0	7	4	0	0	28	30	0	0	1	1	0
O53406	23	56	38	34	32	4	53	45	19	30	12	81	48	12	15	6	48	4	4	9	15	0	18	14	9	5	13	3	2	14	16	12	2	12	12	0	0	1	15	14	0	0	15	23	3	3	17	19	0
O53407	0	1	0	0	0	0	0	0	0	0	0	0	1	0	0	0	0	0	0	0	1	0	1	1	0	1	0	1	1	1	1	1	2	1	2	1	1	0	2	2	1	0	1	1	1	1	1	1	0
O53408	0	0	0	0	0	0	0	0	0	0	0	0	0	0	0	0	0	0	0	0	1	0	0	0	0	0	0	0	0	0	0	0	0	1	0	0	0	0	0	0	0	0	0	0	0	0	1	1	0
O53409	2	10	4	4	5	1	6	7	3	3	3	7	4	5	5	1	4	1	1	5	5	0	5	3	2	2	2	3	3	3	3	4	1	2	5	2	2	1	6	5	2	1	4	4	2	4	3	3	0
O53410	4	8	12	9	12	4	14	5	2	8	1	14	7	7	5	1	11	0	0	2	0	1	3	4	2	0	2	1	2	7	6	2	0	5	4	1	1	1	3	5	1	0	1	2	1	0	1	2	0
O53413	1	0	1	1	1	0	2	1	1	1	1	1	1	0	0	0	1	0	0	0	2	0	0	0	1	0	0	0	0	0	0	0	0	0	0	0	0	0	0	0	0	0	0	0	0	0	0	0	0
O53414	3	2	3	0	1	0	3	2	1	1	1	3	5	1	2	0	1	0	0	1	4	1	3	1	4	1	5	2	2	4	3	0	1	4	5	2	1	0	4	5	0	0	4	3	2	0	7	8	0
O53416	0	0	0	0	0	0	0	0	0	0	0	0	0	0	0	0	0	0	0	0	0	0	0	0	0	0	0	0	0	0	0	0	0	0	0	0	0	0	0	0	0	0	0	0	0	0	0	0	0
O53417	0	0	0	0	0	0	0	0	0	0	0	0	0	0	0	0	0	0	0	0	0	0	0	0	0	0	0	0	0	0	0	1	0	0	1	0	0	0	0	0	0	0	0	0	0	0	0	0	0
O53419	9	24	15	16	15	0	20	15	12	15	8	35	16	6	6	1	23	0	0	2	3	0	13	14	6	3	9	2	1	8	8	6	1	9	3	0	1	1	6	4	0	0	2	2	1	0	8	8	0
O53420	0	0	0	0	0	0	0	0	0	0	0	0	0	0	0	0	0	0	0	0	0	1	0	1	0	0	0	0	0	0	0	0	0	0	0	0	0	0	0	0	0	0	0	0	0	0	1	1	1
O53421	0	0	0	0	0	0	0	0	0	0	0	0	0	0	0	0	0	0	0	0	1	0	0	0	0	0	0	1	0	0	0	1	0	1	0	1	0	0	1	2	0	0	0	1	0	0	12	7	0
O53422	5	6	7	6	7	0	11	9	6	6	5	16	9	1	1	1	19	0	0	2	1	1	6	9	3	2	5	1	0	3	3	5	0	7	4	1	3	0	4	4	0	0	1	0	0	0	8	7	0
O53423	0	2	2	0	1	0	4	0	0	2	2	2	3	1	2	0	2	0	0	0	2	0	3	2	1	1	2	0	0	1	1	3	3	2	2	0	0	0	2	2	0	0	3	3	0	1	6	6	0
O53424	29	28	27	24	33	1	32	33	14	21	10	63	15	2	2	0	88	0	0	1	4	1	7	5	7	1	6	0	3	1	2	4	2	5	0	0	0	0	0	1	0	0	1	2	0	0	4	5	0
O53426	1	0	1	1	1	0	2	1	1	1	0	2	1	0	0	0	3	0	0	0	2	1	2	2	1	1	1	0	1	1	1	1	0	3	2	1	0	0	2	1	1	1	3	3	0	2	3	3	0
O53429	0	0	0	0	0	0	0	0	0	0	0	0	0	0	0	0	0	0	0	0	0	0	0	0	0	0	0	0	0	0	0	0	0	0	0	0	0	0	0	0	0	0	0	0	0	0	1	1	0
O53430	1	4	1	0	1	0	1	3	1	1	0	1	2	1	1	1	1	1	1	1	0	1	0	1	4	4	0	0	0	0	0	1	0	0	0	0	0	0	1	0	0	0	0	1	0	0	4	3	0
O53431	0	0	0	0	0	0	0	0	0	0	0	0	0	0	0	0	0	0	0	0	0	0	0	0	0	0	0	0	0	0	0	0	0	0	0	0	0	0	0	0	0	0	0	0	0	0	0	0	0
O53432	1	2	1	3	1	0	2	3	1	2	1	3	3	1	0	0	3	0	0	0	1	0	0	0	3	1	1	1	0	3	3	0	4	1	2	0	0	0	2	2	0	0	2	2	3	2	1	1	0
O53434	2	10	4	2	2	0	3	2	2	2	1	7	2	3	2	2	3	1	1	3	2	1	1	1	2	2	2	1	1	1	1	1	1	1	1	2	2	1	1	1	1	0	2	2	1	1	2	2	0
O53438	0	0	0	0	0	0	0	0	0	0	0	0	0	0	0	0	0	0	0	0	0	0	0	0	0	2	0	0	0	0	0	0	0	0	0	0	0	0	0	0	0	0	0	0	0	0	0	0	0
O53441	7	19	10	9	8	2	16	8	4	9	7	15	9	8	9	5	16	2	2	6	8	4	6	7	13	5	8	5	4	11	9	6	8	7	6	11	9	2	7	9	3	4	8	11	4	9	14	10	1
O53442	0	9	0	0	0	0	0	0	0	0	0	0	1	1	1	0	0	0	0	0	0	0	0	0	0	0	0	0	0	0	0	0	0	0	0	0	0	0	1	1	0	0	0	0	0	0	0	0	0
O53443	1	0	2	1	2	0	2	5	1	2	1	4	2	0	1	0	3	0	0	1	2	1	2	1	1	2	1	1	1	2	2	1	0	2	2	2	2	1	2	2	0	0	1	1	1	2	2	2	0
O53444	3	0	0	0	0	1	0	3	1	0	0	0	4	0	0	0	0	0	0	2	4	0	1	2	5	1	1	1	1	1	1	3	2	0	2	5	6	1	3	1	1	0	4	4	0	1	5	5	0
O53445	0	0	0	0	0	0	0	0	0	0	0	0	0	0	0	0	0	0	0	0	0	0	0	0	0	0	0	0	0	0	0	0	0	0	0	0	0	0	0	0	0	0	0	0	0	0	0	0	0
O53446	3	7	5	3	8	0	5	13	4	3	3	5	4	4	4	1	4	0	1	3	3	1	5	5	3	3	4	3	3	4	4	6	2	3	3	2	0	0	4	3	2	2	3	3	2	4	6	6	0
O53447	0	0	0	0	0	0	0	0	0	0	0	0	0	0	0	0	0	0	0	0	2	0	0	0	1	1	1	1	1	1	1	0	0	0	0	2	1	0	1	1	1	1	1	1	0	0	1	1	0
O53448	0	0	0	0	0	0	0	0	0	0	0	0	0	0	0	0	0	0	0	0	0	0	0	0	0	0	0	0	0	0	0	0	0	0	0	0	0	0	0	0	0	0	0	0	0	0	1	1	0
O53449	1	1	1	2	1	0	1	2	1	1	1	3	2	1	1	1	1	0	0	0	4	1	2	3	5	1	3	2	2	2	2	3	2	2	2	3	3	0	3	3	1	1	8	7	1	3	4	3	0
O53450	0	0	0	0	0	0	0	0	0	0	0	0	0	0	0	0	0	0	0	0	1	0	0	0	0	0	0	0	0	0	0	0	0	0	0	1	1	0	0	0	0	0	3	1	0	1	0	0	0
O53451	0	0	0	0	0	0	0	0	0	0	0	0	0	0	0	0	0	0	0	0	0	0	0	0	0	0	0	0	0	0	0	0	0	0	0	0	0	0	0	0	0	0	0	0	0	0	0	0	0
O53452	47	18	22	48	24	1	31	63	32	16	8	45	22	1	1	0	75	0	0	0	2	0	3	1	0	0	0	0	2	0	0	0	0	2	0	0	0	0	0	0	0	0	1	2	0	0	1	2	0
O53453	39	0	25	40	17	0	25	60	27	14	6	42	13	0	0	0	69	0	0	0	0	0	1	0	0	0	0	0	1	0	0	0	0	1	0	0	0	0	0	0	0	0	0	0	0	0	0	2	0
O53454	36	137	30	24	32	4	64	57	26	27	34	59	35	30	30	2	39	0	1	11	51	7	19	21	27	16	25	7	11	28	27	49	11	13	16	7	4	2	34	36	4	2	38	39	6	7	42	39	0
O53457	0	0	0	0	0	0	0	0	0	0	0	0	0	0	0	0	0	0	0	0	0	0	0	0	0	0	0	0	0	0	0	0	0	0	0	0	0	0	0	0	0	0	0	0	0	0	0	0	0
O53459	5	11	8	6	7	4	5	8	6	5	7	10	7	11	10	7	9	4	3	6	3	2	4	4	5	4	3	4	5	4	4	4	3	4	4	3	2	3	5	4	4	3	5	6	5	3	3	3	3
O53461	0	0	0	0	0	0	0	0	0	0	0	0	0	0	0	0	0	0	0	0	0	0	0	0	0	0	0	0	0	0	0	0	0	0	0	0	0	0	15	16	0	0	0	0	0	0	9	7	0
O53462	0	0	0	0	0	0	0	0	0	0	0	0	0	0	0	0	0	0	0	0	0	0	0	0	0	0	0	0	0	0	0	0	0	0	0	0	0	0	0	0	0	0	0	0	0	0	0	0	0
O53463	0	2	6	1	1	1	0	0	0	1	1	1	0	0	0	1	1	0	0	0	9	6	5	7	13	3	9	1	3	8	4	12	1	1	1	20	13	0	7	7	2	1	8	8	0	1	7	8	0
O53464	0	0	0	0	0	0	0	0	0	0	0	0	0	0	0	0	0	0	0	0	0	0	0	0	0	1	0	0	0	0	0	0	0	0	0	0	0	0	0	1	0	0	2	2	0	0	1	1	0
O53465	0	0	0	0	0	0	0	0	0	0	0	0	0	0	0	0	0	0	0	0	0	0	0	0	0	0	0	0	0	0	0	0	0	0	0	0	0	0	0	0	0	0	1	1	0	0	0	0	0
O53466	0	0	0	0	0	0	0	0	0	0	0	0	0	0	0	0	0	0	0	0	0	0	1	0	0	0	0	0	0	0	0	0	0	0	0	0	0	0	0	0	0	0	0	0	0	0	1	1	0
O53467	0	0	0	0	0	0	0	0	0	0	0	0	0	0	0	0	0	0	0	0	2	1	2	1	1	0	1	2	0	1	1	4	0	0	0	3	1	0	2	1	0	0	3	3	0	0	1	2	0
O53468	0	0	0	0	0	0	0	0	0	0	0	0	0	0	0	0	0	0	0	0	2	0	0	0	0	0	0	0	0	0	0	0	0	0	0	1	0	0	1	1	0	0	1	1	0	0	0	0	0
O53469	0	0	0	0	0	0	0	0	0	0	0	0	0	0	0	0	0	0	0	0	0	0	0	0	0	0	0	0	0	0	0	0	0	0	0	0	0	0	0	0	0	0	0	0	0	0	0	0	0
O53470	0	0	1	2	2	1	1	0	0	2	2	5	0	0	1	2	3	2	2	2	2	3	2	0	2	1	0	2	1	1	1	0	1	1	2	3	0	0	3	3	0	0	7	7	0	1	2	4	0
O53471	6	14	12	14	14	1	18	10	6	11	3	20	11	2	2	1	16	0	0	5	10	1	1	5	2	1	4	1	2	4	3	3	1	6	1	2	2	0	4	4	1	1	3	1	2	3	7	5	0
O53472	0	20	0	0	0	0	0	0	0	0	3	0	18	3	4	0	0	0	0	0	13	0	4	4	2	2	1	1	3	3	3	3	1	3	9	1	0	0	9	13	0	0	12	11	2	1	7	13	0
O53473	2	0	6	0	4	0	9	1	1	4	0	5	2	0	0	1	8	0	0	0	11	0	6	1	20	6	0	1	1	4	4	3	1	1	8	6	1	3	15	16	0	0	17	15	1	0	10	11	0
O53474	0	19	0	0	0	0	0	0	0	0	3	0	18	2	0	0	0	0	0	0	11	0	4	4	2	2	0	1	2	3	3	2	1	3	8	1	0	0	7	11	0	0	11	9	2	0	6	13	0
O53475	0	0	0	0	0	0	0	0	0	0	0	0	0	0	0	0	0	0	0	0	4	0	0	0	0	1	1	0	0	0	0	0	0	0	1	0	1	1	0	1	0	0	1	2	1	1	1	2	0
O53476	0	0	0	0	0	0	0	0	0	0	0	0	0	0	0	0	0	0	0	0	0	0	0	0	0	0	0	0	0	0	0	0	0	0	0	0	0	0	1	2	0	0	0	0	0	0	0	0	0
O53477	0	0	0	0	0	0	0	0	0	0	0	0	0	0	0	0	0	0	0	0	0	0	0	0	0	0	0	0	0	0	0	0	0	0	0	0	0	0	0	0	0	0	0	0	0	0	1	1	0
O53478	0	0	0	0	0	0	0	0	0	0	0	0	0	0	0	0	0	0	0	0	10	2	2	3	6	0	6	3	1	4	5	13	1	4	5	8	9	1	6	10	0	0	9	8	1	2	20	15	0
O53479	0	0	0	0	0	0	0	0	0	0	0	0	0	0	0	0	0	0	0	0	1	0	1	0	1	0	0	0	0	1	1	1	0	0	0	0	0	0	1	5	0	0	0	0	0	0	2	2	0
O53480	0	0	0	0	0	0	0	0	0	0	0	0	0	0	0	0	0	0	0	0	0	0	0	0	0	2	0	0	0	0	0	0	0	0	0	0	0	0	0	0	0	0	0	0	0	0	2	2	0
O53481	1	0	4	2	6	1	11	1	1	3	1	6	4	3	2	0	3	0	0	1	0	1	2	3	2	0	1	1	2	5	5	2	0	2	4	1	1	0	4	5	0	0	0	0	1	0	0	0	0
O53482	1	1	4	7	2	0	1	1	1	4	1	5	3	0	1	0	6	0	1	0	20	16	32	18	19	12	24	20	18	31	28	108	10	7	15	43	30	4	15	15	2	2	29	30	7	7	32	31	6
O53483	0	0	0	0	0	0	0	0	0	0	0	0	0	0	0	0	0	0	0	0	6	16	10	3	2	11	6	9	11	12	11	83	0	2	2	9	2	0	5	7	0	0	12	11	1	3	53	43	4
O53484	0	0	0	0	0	0	0	0	0	0	0	0	0	0	0	0	0	0	0	0	5	14	7	3	3	10	5	8	12	11	10	75	0	0	2	11	2	0	4	5	0	0	10	11	1	3	51	46	1
O53485	0	0	0	0	0	0	0	0	0	0	0	0	0	0	0	0	0	0	0	0	6	10	6	0	1	6	6	2	5	5	4	45	0	0	1	5	2	0	2	2	0	1	5	5	0	1	27	29	1
O53486	0	1	0	0	0	0	0	0	0	0	0	0	0	0	0	0	0	0	0	0	0	0	0	0	0	0	0	0	0	0	0	0	0	0	0	0	0	0	0	0	0	0	1	1	0	0	0	0	0
O53487	0	0	0	0	0	0	0	0	0	0	0	0	0	0	0	0	0	0	0	0	0	0	0	0	0	0	0	0	0	0	0	0	0	0	0	0	0	0	0	0	0	0	0	0	0	0	0	0	0
O53488	48	21	27	51	26	1	32	64	32	17	9	53	24	2	2	0	87	0	0	0	3	0	4	2	1	0	2	0	2	0	0	0	0	2	0	0	0	0	0	0	0	0	1	2	0	0	2	2	0
O53489	0	0	0	0	0	0	0	0	0	0	0	0	0	0	0	0	0	0	0	0	0	0	0	0	0	0	0	0	0	0	0	0	0	0	0	0	0	0	0	0	0	0	0	0	0	0	0	0	0
O53490	16	25	22	13	27	3	32	17	6	18	11	24	21	16	21	2	18	0	0	11	23	2	13	14	14	8	14	4	6	11	11	34	3	13	9	5	2	2	16	14	3	3	34	40	3	4	17	19	0
O53491	0	0	0	0	0	0	0	0	0	0	0	0	0	0	0	0	0	0	0	0	0	0	0	0	0	0	0	0	0	0	0	0	0	0	0	0	0	0	0	0	0	0	0	0	0	0	0	0	0
O53492	0	0	0	0	0	0	0	0	0	0	0	0	0	0	0	0	0	0	0	0	0	0	0	0	0	1	0	0	0	0	0	0	0	0	0	0	0	0	0	0	0	0	0	0	0	0	1	2	0
O53493	8	16	6	5	5	3	13	4	5	6	5	9	9	3	5	1	7	1	1	4	18	0	8	8	15	8	13	6	3	6	9	13	14	9	10	8	5	2	16	17	0	0	34	33	5	5	11	12	0
O53494	1	5	7	3	10	0	12	7	2	6	2	14	9	2	2	0	13	0	0	0	1	0	5	3	17	2	3	0	0	7	5	9	2	5	1	9	10	0	3	4	0	1	1	1	3	1	15	11	0
O53495	0	0	0	0	0	0	0	0	0	0	0	0	0	0	0	0	0	0	0	0	0	0	0	0	0	0	0	0	0	0	0	0	0	0	0	0	0	0	0	0	0	0	0	0	0	0	0	0	0
O53498	0	2	0	0	0	0	0	0	0	0	0	0	0	2	2	0	0	0	0	0	3	0	0	0	0	0	0	0	0	0	0	1	0	0	0	0	1	0	0	0	0	0	3	3	0	0	0	0	0
O53499	20	50	38	23	46	12	61	32	12	32	27	84	25	22	23	12	57	9	9	17	4	0	3	0	0	1	0	1	1	2	2	0	3	0	1	4	2	0	2	5	0	0	4	6	0	0	2	1	0
O53500	0	0	0	0	0	0	0	0	0	0	0	0	0	0	0	0	0	0	0	0	2	0	0	0	0	0	0	0	0	0	0	0	1	0	0	1	0	0	0	1	0	0	2	1	0	0	0	0	0
O53501	0	0	0	0	0	0	0	0	0	0	0	0	0	0	0	0	0	0	0	0	0	0	0	0	0	0	0	0	0	0	0	0	0	0	0	0	0	0	0	0	0	0	0	0	0	0	0	0	0
O53502	0	0	0	0	0	0	0	0	0	0	0	0	0	0	0	0	0	0	0	0	0	0	0	0	0	0	0	0	0	0	0	0	0	0	0	0	0	0	0	0	0	0	0	0	0	0	0	0	0
O53503	0	0	0	0	0	0	0	0	0	0	0	0	0	0	0	0	0	0	0	0	0	0	0	0	0	1	0	0	0	0	0	0	0	0	0	0	0	0	0	0	0	0	0	0	0	0	3	3	0
O53504	0	0	0	0	0	0	0	0	0	0	0	0	0	0	0	0	0	0	0	0	0	0	0	0	0	0	0	0	0	0	0	0	0	0	0	0	0	0	0	0	0	0	0	0	0	0	0	0	0
O53505	0	0	0	0	0	0	0	0	0	0	0	0	0	0	0	0	0	0	0	0	0	0	0	0	0	0	0	0	0	0	0	0	0	0	0	0	0	0	0	0	0	0	0	0	0	0	0	0	0
O53506	0	0	0	0	0	0	0	0	0	0	0	0	0	0	0	0	0	0	0	0	0	0	0	0	0	0	0	0	0	0	0	0	0	0	0	0	0	0	0	0	0	0	0	0	0	0	0	0	0
O53507	4	22	4	2	3	2	5	7	3	3	3	5	3	4	4	2	6	2	2	3	3	1	2	2	2	2	2	2	2	2	2	2	2	2	2	1	1	1	2	2	2	2	2	2	2	2	3	2	0
O53508	1	2	0	1	1	0	1	0	1	0	1	0	1	1	1	0	0	0	1	0	1	0	0	0	0	0	0	0	0	0	0	0	0	0	0	0	0	0	0	1	0	0	1	0	0	0	3	2	0
O53509	0	0	0	0	0	0	0	0	0	0	0	0	0	0	0	0	0	0	0	0	0	0	0	0	0	0	0	0	0	0	0	0	0	0	0	0	0	0	0	0	0	0	0	0	0	0	1	1	0
O53510	159	1043	506	335	502	48	1552	378	141	421	292	1056	231	88	86	39	855	31	32	97	56	0	5	1	30	5	1	0	0	0	0	1	6	1	0	2	2	5	18	21	0	0	48	55	1	0	7	10	0
O53511	0	0	0	0	0	0	0	0	0	0	0	0	0	0	0	0	0	0	0	0	3	0	1	0	4	1	14	0	0	0	2	1	0	0	0	2	0	7	0	0	0	0	1	0	0	0	1	4	0
O53512	0	4	0	0	0	0	0	0	0	0	1	0	0	1	1	0	0	0	0	0	0	0	0	0	0	1	1	0	0	0	0	1	0	0	0	0	0	0	0	0	0	0	0	0	0	1	1	1	0
O53513	0	0	0	0	0	0	0	0	0	0	0	0	0	0	0	0	0	0	0	0	0	0	0	0	0	0	0	0	0	0	0	0	0	0	0	0	0	0	0	0	0	0	0	1	0	0	0	0	0
O53514	0	0	0	0	0	0	0	0	0	0	0	0	0	0	0	0	0	0	0	0	0	0	0	0	1	0	0	0	0	0	0	0	0	0	0	0	0	0	0	0	0	0	0	0	0	0	0	0	0
O53515	0	0	0	0	0	0	0	0	0	0	0	0	0	0	0	0	0	0	0	0	0	0	0	0	1	0	0	0	0	0	0	0	0	0	0	0	0	0	0	0	0	0	0	0	0	0	0	3	0
O53516	10	19	15	14	16	2	16	14	9	13	8	23	11	4	3	4	16	2	2	3	5	3	4	6	5	2	3	2	2	6	5	2	3	10	2	2	1	2	11	11	1	1	6	6	2	4	4	5	1
O53517	0	0	0	0	0	0	0	0	0	0	0	0	0	0	0	0	0	0	0	0	0	0	0	0	0	0	0	0	0	0	0	0	0	0	0	0	0	0	0	0	0	0	0	0	0	0	0	0	0
O53518	1	7	1	2	0	1	1	3	1	1	1	1	1	1	1	1	2	1	1	1	2	0	0	0	1	2	0	0	0	1	1	0	0	1	2	5	1	0	2	2	0	0	3	3	2	0	0	1	0
O53519	0	0	0	0	0	0	0	0	0	0	0	0	0	0	1	0	0	0	0	0	0	0	1	0	0	0	1	0	0	0	0	0	0	0	0	0	0	0	1	1	0	0	0	0	0	0	0	0	0
O53520	0	0	0	0	0	0	0	0	0	0	0	0	0	0	0	0	0	0	0	0	0	0	0	0	0	0	0	0	0	0	0	0	0	0	0	0	0	0	0	0	0	0	0	0	0	0	0	0	0
O53521	22	56	36	34	31	4	52	44	19	30	11	82	47	12	13	6	48	4	4	10	15	0	18	13	8	5	12	3	2	14	16	12	1	12	12	0	0	1	13	13	0	0	14	23	2	3	16	19	0
O53522	5	41	7	5	5	3	8	6	4	5	15	11	9	15	16	1	7	1	1	4	49	4	17	3	18	16	26	2	7	7	8	19	15	9	16	6	0	0	24	31	0	0	53	47	8	7	19	16	0
O53523	0	0	0	0	0	0	0	0	0	0	0	0	0	0	0	0	0	0	0	0	0	0	0	0	2	0	0	0	0	0	0	0	0	0	0	1	1	0	2	1	0	0	0	0	0	0	0	0	0
O53525	3	22	8	7	6	0	7	3	3	4	3	11	7	5	5	0	8	0	0	4	3	1	8	2	2	1	4	2	2	3	2	5	1	2	4	5	0	0	6	7	0	0	5	5	1	2	4	5	0
O53526	8	18	19	16	19	1	27	16	9	15	6	33	12	4	4	2	42	1	0	2	3	2	1	1	2	1	0	0	0	0	0	1	1	2	0	2	2	0	5	4	0	0	2	2	0	0	6	5	0
O53527	0	0	0	0	0	0	0	0	0	0	0	0	0	0	0	0	0	0	0	0	0	0	0	0	0	0	0	0	0	0	0	0	0	0	0	0	0	0	0	0	0	0	0	0	0	0	0	0	0
O53528	0	0	0	0	0	0	0	0	0	0	0	0	0	0	0	0	0	0	0	0	0	0	0	0	0	0	0	0	0	0	0	0	0	0	0	0	0	0	0	0	0	0	0	0	0	0	0	0	0
O53529	0	0	0	0	0	0	0	0	0	0	0	0	0	0	0	0	0	0	0	0	0	0	0	0	0	0	0	0	0	0	0	0	0	0	0	0	0	0	0	0	0	0	0	0	0	0	0	0	0
O53530	0	0	0	0	0	0	0	0	0	0	0	0	0	0	0	0	0	0	0	0	0	0	0	0	0	1	0	0	0	0	0	0	0	0	0	0	0	0	0	0	0	0	0	0	0	0	1	1	0
O53531	0	1	4	9	1	0	2	0	0	2	1	3	6	2	2	0	1	0	1	0	1	2	0	3	13	1	1	0	0	1	1	6	0	1	0	2	2	1	3	2	0	0	2	1	0	0	6	4	0
O53532	20	79	38	25	32	4	48	25	20	32	28	58	50	42	39	3	37	5	6	12	64	1	25	14	25	5	20	14	9	20	18	25	7	20	24	18	14	3	31	30	7	4	35	37	11	8	13	21	0
O53533	12	37	20	15	23	2	30	11	1	17	10	29	12	8	8	1	22	0	0	16	14	0	7	11	14	7	11	2	6	6	5	25	3	5	5	5	1	0	14	17	1	1	14	13	1	3	21	24	0
O53534	3	11	7	4	8	0	7	7	4	6	5	12	11	4	4	2	8	1	1	2	5	3	7	5	7	3	8	2	2	3	3	8	3	7	4	5	4	1	6	9	0	1	5	4	2	2	7	6	0
O53536	0	0	0	0	0	0	0	0	0	0	0	0	1	0	0	0	1	0	0	0	1	0	1	2	2	2	1	1	1	1	1	2	1	1	2	1	1	0	1	1	0	0	1	1	1	1	1	2	0
O53537	42	94	60	71	59	2	110	64	37	46	31	80	52	22	23	2	73	2	2	11	26	4	20	27	24	6	29	3	8	14	16	55	4	22	9	4	5	1	19	18	1	3	22	25	1	2	32	31	0
O53538	7	23	20	12	14	5	28	16	9	14	10	25	10	7	7	5	31	5	5	14	4	1	5	3	2	2	1	2	2	2	3	1	1	1	1	2	2	1	10	9	2	2	5	6	1	1	3	1	1
O53539	0	2	0	0	0	0	1	0	0	0	0	0	1	1	1	0	0	0	0	0	1	0	5	2	1	0	3	1	1	2	2	1	1	2	2	0	0	1	2	1	1	1	1	1	2	1	0	0	0
O53540	0	2	0	0	0	0	1	0	0	0	0	0	0	1	1	0	0	1	0	0	1	0	3	2	1	0	3	1	1	2	2	1	1	2	2	0	0	1	2	1	1	1	1	1	2	1	0	0	0
O53541	0	1	0	0	0	0	1	0	0	0	0	0	3	1	1	0	0	0	0	0	1	0	3	2	1	0	2	0	1	1	1	1	1	0	2	0	0	1	2	1	1	1	1	1	2	1	0	0	0
O53542	0	2	0	0	0	0	1	0	0	0	0	0	0	1	1	0	0	0	0	0	1	0	3	2	1	0	3	2	2	3	2	1	1	2	2	0	0	1	2	1	1	1	1	1	2	1	0	0	0
O53543	0	2	0	0	0	0	1	0	0	0	0	0	2	1	2	0	0	0	0	0	1	0	3	2	1	0	3	1	1	2	2	2	1	2	2	0	0	1	2	1	1	1	1	1	2	2	0	0	0
O53545	0	1	0	0	0	0	0	0	0	0	0	0	0	1	1	0	0	0	0	0	1	0	3	1	1	0	2	1	1	1	1	1	1	0	2	0	0	1	2	1	1	1	1	1	2	1	0	0	0
O53546	0	1	0	0	0	0	0	0	0	0	0	0	0	1	1	0	0	0	0	0	1	0	3	1	1	0	2	1	1	1	1	1	1	0	2	0	0	1	2	1	1	1	1	1	2	1	0	0	0
O53547	33	82	50	48	46	1	71	53	32	39	25	65	57	7	9	2	58	1	1	7	24	4	27	31	26	8	40	4	10	17	17	61	6	22	10	3	5	1	21	19	1	1	21	26	1	4	36	32	0
O53548	0	1	0	0	0	0	0	0	0	0	0	0	0	1	1	0	0	0	0	0	0	0	0	0	0	2	0	0	0	0	0	0	0	0	0	0	0	0	0	0	0	0	0	0	0	0	2	2	0
O53549	12	10	23	31	17	0	29	17	12	15	11	33	19	5	5	0	19	0	0	1	4	1	21	26	5	4	12	0	0	5	4	13	0	22	3	1	3	0	8	9	0	0	2	2	0	0	8	9	0
O53550	12	10	23	26	16	0	28	16	11	14	11	31	18	5	5	0	18	0	0	1	4	1	21	26	5	4	12	0	0	5	4	14	0	22	3	1	3	0	8	9	0	0	2	2	0	0	10	11	0
O53551	23	56	38	32	32	4	53	46	19	30	12	80	47	12	15	6	48	4	4	9	15	0	19	15	9	5	13	3	2	14	16	12	2	12	12	0	0	1	15	15	0	0	15	23	3	3	17	20	0
O53553	0	0	0	0	0	0	0	0	0	0	0	0	0	0	0	0	0	0	0	0	0	0	0	0	0	0	0	0	0	0	0	0	0	0	0	0	0	0	0	0	0	0	0	0	0	0	0	0	0
O53554	1	6	5	3	1	1	5	1	1	2	0	6	5	2	2	1	3	0	0	7	3	0	3	3	4	2	5	2	2	3	2	4	2	2	1	3	2	1	3	2	0	0	3	3	1	2	9	8	0
O53555	0	2	1	2	1	0	1	2	1	1	4	1	3	1	1	0	2	0	0	0	0	0	1	1	4	0	3	0	1	1	0	5	1	1	1	1	0	0	0	0	0	0	1	1	0	1	3	4	0
O53558	18	56	30	28	26	4	43	44	18	24	10	53	39	12	14	4	39	4	4	9	15	0	18	13	9	5	12	3	2	13	15	11	2	12	12	0	0	1	13	13	0	0	14	22	2	3	16	19	0
O53561	9	25	16	16	16	0	21	16	12	15	9	35	18	6	6	2	24	0	0	3	4	0	13	14	6	3	10	2	1	8	8	6	1	9	4	0	1	1	6	5	0	0	2	2	1	0	8	8	0
O53562	0	0	0	0	0	0	0	0	0	0	0	0	0	0	0	0	0	0	0	0	2	0	0	0	0	0	0	1	0	0	0	1	0	1	0	1	0	0	1	2	0	0	0	1	0	0	12	7	0
O53563	85	231	79	71	55	0	148	78	55	51	5	146	76	11	8	0	159	0	0	2	10	0	0	0	1	2	0	0	0	0	0	4	0	2	0	0	0	0	0	0	0	0	6	4	0	0	3	5	0
O53564	0	2	0	0	0	0	0	0	0	0	1	0	0	0	0	0	0	0	0	0	0	0	0	2	0	0	1	0	0	0	0	0	0	0	0	0	0	0	0	0	0	0	1	0	0	0	0	1	0
O53565	0	0	0	0	0	0	0	0	0	0	0	0	0	0	0	0	0	0	0	0	1	1	4	6	0	2	1	1	0	1	1	24	0	1	0	0	0	0	0	0	0	0	2	7	0	0	15	12	0
O53566	0	0	0	0	0	0	0	0	0	0	0	0	0	0	0	0	0	0	0	0	0	0	0	0	0	0	0	0	0	0	0	0	0	0	0	0	0	0	0	0	0	0	0	0	0	0	0	0	0
O53567	7	7	10	7	8	0	12	10	6	6	5	17	10	2	2	1	18	0	0	2	4	3	7	10	4	2	6	2	1	5	5	5	1	8	4	3	4	1	6	6	1	1	1	1	1	1	9	9	0
O53568	0	0	0	0	0	0	0	0	0	0	0	0	0	0	0	0	0	0	0	0	1	1	1	1	2	2	2	1	1	1	1	2	0	1	1	2	2	1	3	3	1	1	1	1	0	1	2	2	0
O53571	0	0	0	0	0	1	0	0	0	0	0	0	0	0	0	0	0	0	0	0	1	1	1	1	1	2	0	1	0	0	0	0	1	0	0	2	2	1	2	1	0	0	1	1	1	0	1	1	1
O53572	0	0	0	0	0	0	0	0	0	0	0	0	0	0	0	0	0	0	0	0	0	0	0	0	0	0	0	0	0	0	0	0	0	0	0	0	0	0	0	0	0	0	0	0	0	0	1	1	0
O53573	1	15	0	2	0	0	0	1	1	0	0	0	1	1	1	0	0	0	0	1	3	0	3	2	5	1	1	1	1	1	1	1	0	1	1	0	0	0	1	3	0	0	1	3	0	2	2	2	0
O53574	1	5	2	1	3	1	2	1	0	2	2	3	3	3	3	2	2	1	1	2	2	2	2	2	2	2	2	2	2	2	2	2	2	2	3	2	2	2	2	2	1	1	1	1	2	2	2	2	0
O53577	12	10	23	27	18	0	27	19	13	14	11	33	20	5	5	0	20	0	0	1	3	1	19	24	5	4	12	0	0	5	4	11	0	22	3	1	3	0	8	9	0	0	2	2	0	0	9	9	0
O53578	2	6	4	5	9	1	6	4	2	4	3	8	7	2	2	1	7	0	0	2	2	2	5	5	6	2	3	2	2	3	3	4	1	4	3	2	3	2	6	6	1	1	2	2	2	2	2	3	0
O53579	5	7	7	6	8	3	10	9	3	5	5	4	11	10	13	2	4	0	0	2	11	2	8	9	4	3	2	2	2	6	6	13	3	7	3	2	2	2	4	2	2	2	26	37	2	2	4	4	0
O53580	23	56	37	31	30	4	52	46	19	30	13	80	49	12	15	6	48	4	4	10	15	0	18	13	9	5	13	3	2	14	16	12	2	12	12	0	0	1	15	15	0	0	15	23	3	3	17	20	0
O53581	0	0	0	0	0	0	0	0	0	0	0	0	0	0	0	0	0	0	0	0	0	0	0	0	0	0	0	0	0	0	0	0	0	0	0	0	0	0	0	0	0	0	0	0	0	0	1	0	0
O53582	0	0	0	0	0	0	0	0	0	0	0	0	0	0	0	0	0	0	0	0	0	0	0	0	0	0	0	0	0	0	0	0	0	0	0	0	0	0	0	0	0	0	0	0	0	0	0	0	0
O53583	2	8	2	5	2	0	2	2	2	2	1	3	4	5	3	2	2	2	2	2	5	0	3	2	2	2	2	1	0	2	2	2	0	2	2	0	0	0	1	2	2	2	6	5	2	1	2	1	0
O53584	0	0	0	0	0	0	0	0	0	0	0	0	0	0	0	0	0	0	0	0	0	0	0	0	0	0	0	0	0	0	0	0	0	0	0	0	0	0	0	0	0	0	0	0	0	0	0	0	0
O53585	13	14	27	11	20	3	32	15	9	27	15	37	11	5	4	0	37	0	0	1	19	0	6	7	12	12	14	8	4	7	9	17	13	5	9	2	1	3	17	14	0	0	39	37	3	3	11	15	0
O53590	0	0	0	0	0	0	0	0	0	0	0	0	0	0	0	0	0	0	0	0	5	2	6	2	29	12	3	2	2	3	4	12	4	2	2	16	15	0	19	19	0	0	3	2	1	7	17	10	0
O53591	0	0	0	0	0	0	0	0	0	0	0	0	0	0	0	0	0	0	0	0	0	0	0	0	0	0	0	0	0	0	0	0	0	0	0	0	0	0	0	0	0	0	0	0	0	0	0	0	0
O53594	0	0	0	0	0	0	0	0	0	0	0	0	0	0	0	0	0	0	0	0	0	0	0	0	0	1	0	0	0	0	0	0	0	0	0	0	0	0	0	1	0	0	0	0	0	0	0	0	0
O53597	1	3	1	3	2	0	0	1	2	2	3	5	2	2	3	0	4	1	1	0	7	1	4	3	4	1	2	3	1	4	5	3	0	3	5	3	2	2	1	2	3	1	2	2	4	1	3	2	1
O53598	0	0	0	0	0	0	0	0	0	1	0	0	0	0	0	0	0	0	0	0	1	1	0	0	1	1	0	0	0	0	0	0	0	0	0	1	1	0	1	1	0	0	1	1	0	0	1	1	0
O53604	0	0	0	0	0	0	0	0	0	0	0	0	0	0	0	0	0	0	0	0	0	0	1	0	0	0	0	0	0	0	0	0	0	0	1	0	0	0	0	0	0	0	0	0	0	0	0	0	0
O53605	2	3	8	1	10	0	17	6	3	10	0	17	7	0	0	2	12	0	0	2	4	0	1	0	1	1	0	0	0	0	0	0	0	0	2	0	0	0	1	1	0	0	0	0	1	0	1	0	0
O53606	0	0	0	0	0	0	0	0	0	0	0	0	0	0	0	0	0	0	0	0	0	0	0	0	0	0	0	0	0	0	0	0	0	0	0	0	0	0	0	0	0	0	0	0	0	0	0	0	0
O53608	2	47	7	6	5	0	5	3	3	4	4	10	5	5	4	0	7	0	0	4	4	1	7	1	2	2	3	1	1	2	2	4	1	2	2	3	0	0	6	5	0	0	5	4	1	1	5	5	0
O53609	0	0	0	0	0	0	0	0	0	0	0	0	0	0	0	0	0	0	0	0	1	0	0	0	0	0	0	0	0	0	0	0	0	0	0	1	0	0	0	0	0	0	2	1	0	0	1	1	0
O53610	0	0	0	0	0	0	0	0	0	0	0	0	0	0	0	0	0	0	0	0	0	0	1	0	0	0	0	0	0	0	0	0	0	0	0	0	0	0	0	0	0	0	1	0	0	0	0	0	0
O53611	0	0	0	0	0	0	0	0	0	0	0	0	1	0	0	0	0	0	0	0	1	0	0	1	0	0	0	0	0	0	0	0	0	1	1	0	0	0	1	1	0	0	0	0	0	1	1	1	0
O53612	0	0	0	0	0	0	0	0	0	0	0	0	1	0	0	0	0	0	0	0	27	1	10	26	11	5	5	4	2	15	13	24	2	17	6	13	6	0	10	13	0	0	9	10	5	0	19	22	0
O53613	46	100	68	75	63	2	128	66	40	49	33	87	66	21	21	2	78	2	2	14	29	4	24	29	22	7	34	3	8	17	15	61	4	23	9	4	5	1	20	19	2	2	23	25	1	2	37	34	0
O53615	4	10	5	2	3	2	10	5	3	5	4	8	5	4	7	1	6	1	1	4	6	3	4	3	12	4	4	3	4	7	4	3	4	2	4	10	8	2	5	5	3	3	7	7	3	7	7	8	1
O53616	0	3	1027	1	2	0	12	6	0	0	0	2	0	0	0	1	12	0	0	2	3	0	0	1	0	0	0	0	0	0	0	0	0	1	0	6	1	0	0	0	0	0	7	1	0	0	0	0	0
O53617	0	0	0	0	0	0	0	0	0	0	0	0	1	0	0	0	0	0	0	0	9	2	3	2	42	2	4	4	5	6	6	3	2	3	4	6	5	1	10	9	1	1	10	10	2	3	3	2	0
O53618	1	2	1	1	0	0	1	0	0	2	1	1	4	1	1	0	1	0	0	0	19	15	26	17	15	11	23	19	17	28	24	112	11	9	16	52	30	5	17	15	3	2	30	28	6	9	32	32	10
O53619	1	4	6	3	11	0	17	7	1	6	1	14	10	0	2	0	13	0	0	1	3	0	5	3	19	3	6	0	0	6	4	10	2	4	2	11	10	0	3	3	1	1	4	3	1	1	16	14	0
O53620	5	37	16	7	7	0	15	7	3	8	10	15	15	9	8	0	14	0	0	6	12	1	15	13	17	8	9	5	5	12	8	13	9	9	10	17	13	1	13	13	2	1	14	15	5	7	14	15	0
O53621	0	0	0	0	0	0	0	0	0	0	0	0	0	0	0	0	0	0	0	0	0	0	0	0	0	0	0	0	0	0	0	0	0	0	0	0	0	0	0	0	0	0	0	0	0	0	0	0	0
O53622	17	116	25	15	20	3	47	36	11	23	16	48	19	19	21	3	38	1	1	6	29	3	17	19	21	4	12	2	5	13	14	29	2	23	10	4	4	1	17	23	2	3	23	27	2	4	24	22	0
O53623	0	0	0	0	0	0	0	0	0	0	0	0	1	0	0	0	0	0	0	0	30	2	12	44	14	7	5	5	4	17	16	29	2	21	6	17	7	0	14	13	0	0	12	11	5	3	25	24	0
O53624	0	1	0	0	0	0	0	0	0	0	0	0	0	0	0	0	0	0	0	0	1	1	1	0	0	1	1	0	0	1	1	1	1	1	1	1	1	0	1	1	0	0	1	1	1	0	1	1	0
O53625	0	0	0	0	0	0	0	0	0	0	0	0	0	0	0	0	0	0	0	0	0	0	0	0	1	1	0	0	0	0	0	0	0	0	0	2	2	0	0	0	0	0	1	2	0	2	1	4	0
O53626	0	0	0	0	0	0	0	0	0	0	0	0	0	0	0	0	0	0	0	0	8	2	1	2	4	0	4	2	0	2	2	7	1	3	5	8	8	1	4	9	0	0	8	7	1	2	12	12	0
O53627	2	2	2	1	1	0	0	2	2	1	1	1	2	0	1	0	2	0	0	0	2	0	1	1	2	2	5	0	0	2	2	1	1	0	1	0	0	1	3	3	1	1	1	1	1	1	0	0	0
O53630	0	0	0	0	0	0	0	0	0	0	0	0	0	0	0	0	0	0	0	0	0	0	0	0	0	0	0	0	0	0	0	0	0	0	0	0	0	0	0	0	0	0	0	0	0	0	0	0	0
O53632	5	26	10	6	10	2	13	13	6	8	9	9	7	5	4	7	10	5	3	2	5	0	0	2	4	2	0	0	1	1	1	2	1	2	1	0	0	2	4	4	0	0	3	3	1	1	1	2	0
O53633	5	0	0	48	0	0	0	12	3	0	0	0	7	0	0	0	0	0	0	0	2	0	5	1	3	2	2	0	1	1	1	5	4	3	1	0	0	0	3	3	0	0	1	2	0	1	4	9	0
O53634	10	79	15	15	19	3	40	11	9	13	17	29	17	19	16	2	18	0	0	5	28	4	7	6	20	10	14	5	6	15	13	19	8	6	9	4	2	1	19	23	1	1	19	20	5	6	19	14	0
O53636	0	2	1	1	0	0	1	2	1	1	0	2	1	2	1	1	2	0	0	0	1	0	1	0	1	0	0	2	2	2	2	0	1	1	1	1	0	0	0	0	0	0	0	0	0	1	1	1	0
O53637	1	5	2	1	3	0	3	1	0	2	2	4	3	1	2	0	4	0	0	1	0	1	0	0	2	1	0	1	1	1	2	0	1	0	0	0	0	0	0	0	0	0	0	0	0	0	1	1	0
O53638	0	0	0	0	0	0	0	0	0	0	0	0	0	0	0	0	0	0	0	0	2	0	1	2	2	1	0	0	0	4	4	9	7	1	3	4	1	0	2	0	0	0	3	3	0	1	1	2	0
O53639	1	6	5	3	1	1	5	1	1	2	0	7	6	2	3	1	3	0	0	7	3	0	3	3	3	2	5	2	2	4	3	4	2	2	1	2	2	1	3	2	0	0	3	3	1	2	10	9	0
O53641	0	0	0	0	0	0	0	0	0	0	0	0	1	0	0	0	0	0	0	0	30	3	13	44	13	6	6	5	4	16	16	29	2	21	7	17	7	0	14	14	0	0	13	11	5	3	26	29	0
O53645	20	46	73	39	29	5	41	50	14	23	17	50	50	7	8	5	65	3	3	10	27	19	21	14	10	9	20	18	16	28	25	88	11	6	17	28	23	10	12	16	4	3	40	34	5	10	28	35	6
O53646	0	6	0	0	0	0	0	0	0	0	1	0	5	3	2	0	0	0	0	1	74	0	33	14	60	24	11	3	4	49	33	31	3	25	20	41	22	2	57	65	1	0	80	74	1	20	23	28	0
O53647	0	0	0	0	0	0	0	0	0	0	0	0	1	0	0	0	0	0	0	0	24	2	8	32	11	3	4	4	2	12	10	26	2	14	5	16	6	0	7	9	0	0	10	10	5	1	20	15	0
O53648	0	2	0	2	1	0	1	0	0	0	1	0	1	1	1	0	0	0	0	0	3	0	6	4	5	5	9	6	9	8	5	6	1	3	9	6	6	0	12	9	0	1	2	2	4	4	4	6	0
O53649	6	0	11	29	9	0	9	43	20	7	0	21	21	0	0	0	17	0	0	0	0	0	0	0	5	0	0	1	0	1	1	0	0	0	0	0	0	0	1	1	0	0	0	0	0	0	1	1	0
O53650	0	0	0	0	0	0	0	0	0	0	0	0	0	0	0	0	0	0	0	0	0	0	0	0	0	0	0	0	0	0	0	0	0	0	0	0	0	0	0	0	0	0	0	0	0	0	0	0	0
O53651	0	0	0	0	0	0	0	0	0	0	0	0	0	0	0	0	0	0	0	0	0	0	0	0	0	0	0	0	0	0	0	0	0	0	0	0	0	0	0	0	0	0	0	0	0	0	0	0	0
O53652	0	0	0	0	0	0	0	0	0	0	0	0	0	0	0	0	0	0	0	0	0	0	0	0	0	0	0	0	0	0	0	0	0	0	0	0	0	0	0	0	0	0	0	0	0	0	0	0	0
O53654	0	0	0	0	0	0	0	0	0	0	0	0	0	0	0	0	0	0	0	0	0	0	0	0	0	0	0	0	0	0	0	0	0	0	0	0	0	0	0	0	0	0	0	0	0	0	0	0	0
O53655	0	0	0	0	0	0	0	0	0	0	0	0	0	0	0	0	0	0	0	0	0	0	2	0	0	0	1	0	0	0	0	0	0	0	0	1	0	0	0	1	0	0	1	0	0	0	0	0	0
O53656	0	0	0	0	0	0	0	0	0	0	0	0	1	0	0	0	0	0	0	0	4	1	0	1	3	1	1	1	1	1	1	1	1	1	2	3	2	0	1	1	1	1	8	7	0	0	4	3	0
O53657	6	1	8	32	9	3	16	7	3	7	6	12	15	5	6	1	8	0	0	1	9	0	12	11	11	3	8	2	3	12	12	11	7	15	13	7	1	1	14	12	2	3	9	6	5	9	5	4	0
O53661	0	0	0	0	0	0	0	0	0	0	0	0	1	0	0	0	0	0	0	0	30	3	12	45	12	6	6	6	4	17	16	29	2	21	7	17	7	0	14	14	0	0	12	11	5	3	26	29	0
O53662	0	0	0	0	0	0	0	0	0	0	0	0	0	0	0	0	0	0	0	0	0	0	0	0	0	0	0	0	0	0	0	0	0	0	0	0	0	0	0	0	0	0	0	0	0	0	0	0	0
O53663	0	0	0	0	0	0	0	0	0	0	0	0	0	0	0	0	0	0	0	0	0	0	0	0	0	0	0	0	0	0	0	0	0	0	0	0	0	0	0	0	0	0	0	0	0	0	0	0	0
O53664	1	2	4	1	3	0	4	2	2	1	2	1	1	1	0	0	2	0	0	2	0	1	1	2	0	1	7	0	0	2	2	1	0	3	2	1	2	0	5	3	0	0	0	0	0	0	5	4	0
O53665	33	83	51	48	43	1	69	51	31	39	25	67	58	7	7	2	57	1	1	6	25	4	27	32	24	8	38	4	10	16	16	62	6	23	10	3	5	1	20	19	3	3	20	25	3	3	35	32	0
O53666	12	10	23	28	16	0	29	18	12	14	11	34	19	5	5	0	20	0	0	1	4	1	21	23	5	4	12	0	0	5	4	11	0	22	3	1	3	0	8	10	0	0	2	1	0	0	9	9	0
O53667	0	0	0	0	0	0	0	0	0	0	0	0	0	2	2	0	0	0	0	0	3	0	4	5	0	0	2	2	0	0	0	10	2	0	0	1	0	0	0	1	1	1	6	6	1	0	7	4	0
O53668	0	0	0	0	0	0	0	0	0	0	0	0	0	0	0	0	0	0	0	0	0	0	0	0	0	0	0	0	0	0	0	0	0	0	0	0	0	0	0	0	0	0	0	0	0	0	0	0	0
O53669	1	3	1	1	1	0	1	3	2	1	1	1	2	2	2	1	1	1	1	1	2	0	2	1	6	2	5	3	3	5	3	2	2	2	5	3	1	0	7	5	1	1	2	3	3	4	1	2	0
O53670	1	3	1	3	2	0	2	2	2	1	3	1	2	4	4	1	2	1	1	4	2	0	2	4	4	2	3	2	1	3	3	3	2	2	2	12	6	0	5	4	1	2	2	5	2	2	5	7	0
O53671	0	0	0	0	0	0	0	0	0	0	0	0	0	0	0	0	0	0	0	0	0	0	0	0	1	1	0	0	0	0	0	0	0	0	0	0	0	0	0	0	0	0	0	0	0	0	0	0	0
O53672	0	0	0	0	0	0	0	0	0	0	0	0	0	0	0	0	0	0	0	0	0	0	0	0	0	0	0	0	0	0	0	0	0	0	0	0	0	0	0	0	0	0	0	0	0	0	0	0	0
O53673	4	30	3	10	3	0	4	2	5	3	3	4	1	3	3	2	5	1	1	2	4	1	2	0	1	3	3	0	0	1	1	3	0	1	1	0	0	1	3	4	0	0	2	3	1	1	1	4	1
O53674	7	29	13	8	11	1	14	13	7	9	11	19	15	13	11	3	17	3	2	7	15	6	9	17	9	15	12	5	4	14	12	10	2	15	15	6	9	1	12	15	3	2	14	19	8	6	19	21	2
O53675	1	4	3	2	4	0	10	7	1	2	1	4	4	7	5	1	4	1	1	0	13	0	3	8	2	2	2	0	0	2	1	2	0	6	3	0	1	1	1	0	0	0	7	6	0	0	4	5	0
O53676	0	0	0	0	0	0	0	0	0	0	0	0	0	0	0	0	0	0	0	0	1	0	1	1	0	1	0	0	0	0	0	1	1	1	1	1	1	0	0	0	0	0	1	1	0	1	0	0	0
O53680	2	12	7	1	3	0	4	1	0	3	3	3	2	2	2	1	3	0	0	1	9	4	5	2	9	1	3	2	2	5	6	13	1	4	2	7	4	0	7	9	0	0	9	8	0	0	8	5	0
O53682	0	0	0	0	0	0	0	0	0	0	0	0	0	0	0	0	0	0	0	0	0	0	0	0	0	0	0	0	0	0	0	0	0	0	0	0	0	0	0	0	0	0	0	0	0	0	2	2	0
O53683	0	0	0	0	0	0	0	0	0	0	0	0	0	0	0	0	0	0	0	0	0	0	0	0	0	0	0	0	0	0	0	0	0	0	0	0	0	0	0	0	0	0	0	0	0	0	0	0	0
O53686	1	4	2	1	2	0	5	1	1	2	2	3	2	3	1	1	2	4	2	2	5	0	1	1	0	0	0	0	1	0	0	0	0	1	0	0	0	0	1	0	0	0	2	0	0	0	0	1	0
O53687	28	119	51	38	50	15	67	60	29	41	34	67	40	40	40	23	57	20	20	27	21	5	11	9	14	8	13	6	9	8	10	9	9	10	10	14	14	9	18	21	7	6	21	22	6	9	12	10	12
O53688	0	0	0	0	0	0	0	0	0	0	0	0	0	0	0	0	0	0	0	0	0	0	0	0	0	0	0	0	0	0	0	0	0	0	0	0	0	0	0	0	0	0	0	0	0	0	0	0	0
O53689	0	0	0	0	0	0	0	0	0	0	0	0	1	0	0	1	0	0	0	0	0	1	1	1	1	2	1	1	1	1	1	2	1	1	1	1	1	1	1	1	1	1	1	1	0	1	3	3	0
O53692	0	0	0	0	0	0	0	0	0	0	0	0	0	0	0	0	0	0	0	0	0	0	0	0	0	0	0	0	0	0	0	0	0	0	0	0	0	0	0	0	0	0	0	0	0	0	0	0	0
O53694	0	0	0	0	0	0	0	0	0	0	0	0	0	0	0	0	0	0	0	0	0	0	0	0	0	0	0	0	0	0	0	0	0	0	0	0	0	0	0	0	0	0	0	0	0	0	0	0	0
O53695	6	65	10	8	11	0	14	7	5	10	4	24	12	2	1	2	19	0	0	4	3	0	2	2	0	3	1	1	0	2	1	0	0	0	1	3	1	0	2	3	0	0	8	9	2	0	6	8	0
O53696	0	0	0	0	0	0	0	0	0	0	0	0	0	0	0	0	0	0	0	0	0	0	0	0	0	0	0	0	0	0	0	0	0	0	0	0	0	0	0	0	0	0	0	0	0	0	0	0	0
O53697	13	64	27	17	24	3	40	20	8	25	9	40	12	13	11	2	34	0	0	5	16	1	8	8	26	8	9	1	5	11	8	15	1	12	8	2	2	0	14	18	1	1	14	14	2	0	20	17	0
O53699	0	3	0	0	0	0	0	0	0	0	0	0	0	2	1	0	0	0	0	0	0	0	1	0	0	0	0	0	0	0	0	0	0	0	0	0	0	0	0	0	0	0	0	0	0	0	0	0	0
O53701	0	4	2	0	3	0	2	1	0	2	2	2	1	0	0	0	3	0	0	0	0	1	1	0	2	0	1	0	0	1	0	1	0	0	0	0	0	0	0	0	0	0	3	2	1	1	0	0	0
O53702	0	0	0	0	0	0	0	0	0	0	0	0	0	0	0	0	0	0	0	0	0	0	0	0	0	0	0	0	0	0	0	0	0	0	0	0	0	0	0	0	0	0	0	0	0	0	0	0	0
O53703	0	0	0	0	0	0	0	0	0	0	0	0	0	0	0	0	0	0	0	0	0	0	0	0	0	0	1	0	0	0	0	0	0	1	1	0	0	0	1	1	0	0	0	0	0	0	0	1	0
O53704	0	0	0	0	0	0	0	0	0	0	0	0	0	0	0	0	0	0	0	0	0	0	0	0	0	1	2	0	0	0	0	0	0	0	1	0	0	0	1	0	0	0	0	0	0	0	0	1	0
O53705	1	1	1	0	1	0	1	2	1	1	1	1	0	0	1	0	1	0	0	1	5	0	3	1	1	2	2	0	0	3	3	1	3	4	4	0	1	0	2	2	0	0	3	3	1	0	3	4	0
O53706	2	4	1	0	2	0	4	2	1	2	1	8	3	1	0	0	5	1	0	1	5	1	4	4	6	5	5	4	4	8	6	6	3	5	7	6	8	0	6	4	1	0	3	4	4	1	4	4	0
O53707	0	0	0	0	0	0	0	0	0	0	0	0	0	0	0	0	0	0	0	0	1	0	3	1	1	1	3	0	0	1	0	2	0	0	2	1	1	0	1	0	0	0	0	1	0	0	2	3	0
O53708	9	8	6	3	6	0	6	7	5	2	1	7	9	0	0	0	9	0	0	0	0	0	4	1	3	2	10	0	0	2	0	2	0	0	1	6	4	0	1	0	0	0	0	1	1	0	2	2	0
O53709	9	6	7	3	6	0	5	6	5	2	1	9	5	0	0	0	10	0	0	0	0	0	3	1	3	2	6	0	0	2	0	2	0	0	1	5	3	0	1	0	0	0	0	1	0	0	2	2	0
O53710	9	6	6	3	6	0	6	7	5	2	0	7	4	0	0	0	9	0	0	0	0	0	3	1	1	1	6	0	0	2	0	2	0	0	1	5	3	0	1	0	0	0	0	1	0	0	2	2	0
O53711	0	0	0	0	0	0	0	0	0	0	0	0	0	0	0	0	0	0	0	0	1	0	3	1	2	1	3	0	0	1	0	2	0	0	2	1	1	0	1	0	0	0	0	1	0	0	2	3	0
O53712	0	0	1	0	0	0	0	0	0	0	0	0	6	0	0	0	0	0	0	0	14	0	68	52	7	0	27	12	20	58	48	72	1	14	6	6	6	0	24	11	0	0	6	8	2	4	18	18	0
O53713	0	0	0	0	0	0	0	0	0	0	0	0	0	0	0	0	0	0	0	0	0	0	0	0	0	0	0	0	0	0	0	0	0	0	0	0	0	0	0	0	0	0	0	0	0	0	0	0	0
O53715	3	8	3	2	3	2	4	2	2	3	2	2	3	7	7	3	3	0	0	2	5	3	3	4	4	3	2	3	3	6	5	5	2	3	4	3	3	3	4	3	1	1	4	4	2	2	5	5	2
O53716	0	0	0	0	0	0	0	0	0	0	0	0	0	0	0	0	0	0	0	0	0	0	0	0	0	0	0	0	0	0	0	0	0	0	0	0	0	0	0	0	0	0	0	0	0	0	0	0	0
O53718	0	0	0	0	0	0	0	0	0	0	0	0	0	0	0	0	0	0	0	0	0	0	0	0	0	0	0	0	0	0	0	0	0	0	0	0	0	0	0	0	0	0	0	0	0	0	0	0	0
O53720	2	216	5	0	8	0	8	4	2	8	1	12	19	1	1	0	7	0	0	1	63	0	12	5	19	6	3	2	2	8	6	13	0	7	7	7	1	5	8	10	0	0	41	33	0	1	15	16	0
O53721	0	0	0	0	0	0	0	0	0	0	0	0	0	0	0	0	0	0	0	0	0	0	0	0	0	0	0	0	0	0	0	0	0	0	0	0	0	0	0	0	0	0	0	0	0	0	0	0	0
O53725	1	2	0	2	2	0	2	1	1	1	1	2	1	0	1	0	6	0	0	0	1	0	2	1	1	1	1	1	1	2	3	1	0	1	1	4	7	0	2	2	0	0	1	1	2	3	3	2	0
O53726	47	103	70	77	65	3	135	68	41	51	35	87	69	23	23	2	78	2	2	14	31	4	21	29	23	6	32	3	8	15	16	62	4	23	9	4	5	1	20	20	2	2	22	26	1	3	35	32	0
O53728	0	0	0	0	0	0	0	0	0	0	0	0	0	0	0	0	0	0	0	0	0	0	0	0	0	0	0	0	0	0	0	0	0	0	0	0	0	0	0	0	0	0	0	0	0	0	0	1	0
O53729	0	0	0	0	0	0	0	0	0	0	0	0	0	0	0	0	0	0	0	0	1	0	0	0	1	1	1	0	0	0	0	2	0	0	0	0	0	0	0	0	0	0	1	0	0	0	1	1	0
O53730	0	1	0	0	0	0	0	0	0	0	0	0	0	0	0	0	0	0	0	0	9	2	6	2	30	14	3	2	2	4	5	12	5	2	3	19	16	0	23	22	0	0	6	6	1	7	17	10	0
O53731	3	11	3	3	1	0	6	2	2	3	7	7	4	4	2	0	5	0	0	2	1	2	2	0	2	0	2	1	1	0	1	1	0	1	1	1	1	0	0	0	0	0	2	0	0	0	1	2	0
O53732	4	25	4	9	4	0	7	8	5	5	10	7	6	13	15	3	8	0	0	3	28	1	8	4	12	2	10	4	2	6	4	12	1	6	13	6	2	0	12	14	2	1	16	14	3	3	5	8	0
O53733	0	1	0	0	0	0	0	0	0	0	1	0	0	1	1	0	0	0	0	0	0	0	1	0	0	0	1	0	0	1	1	1	0	1	1	0	0	0	0	0	0	0	0	0	0	1	0	1	0
O53734	0	9	4	0	7	0	2	0	1	3	3	8	7	6	6	0	6	0	0	0	2	0	4	2	3	2	2	0	0	2	2	1	0	1	1	0	0	0	1	1	0	0	3	3	1	1	2	5	0
O53735	6	1	9	24	7	2	15	7	3	7	6	12	13	5	6	1	8	0	0	1	8	0	11	10	10	3	7	2	2	11	9	9	7	14	12	7	1	1	12	11	2	2	7	5	5	9	6	5	0
O53737	0	0	0	0	0	0	0	0	0	0	0	0	1	0	0	0	0	0	0	0	21	2	11	14	12	5	5	5	3	16	12	25	2	19	5	11	3	0	12	11	0	0	9	10	4	0	19	24	0
O53740	0	0	0	0	0	0	0	0	0	0	0	0	0	0	0	0	0	0	0	0	0	0	0	0	0	0	0	0	0	0	0	0	0	0	0	0	0	0	0	0	0	0	0	0	0	0	0	0	0
O53744	0	0	0	0	0	0	0	0	0	0	0	0	0	0	0	0	0	0	0	0	0	0	1	0	0	0	1	0	0	0	0	0	0	0	1	0	0	0	0	0	0	0	0	0	0	1	3	1	0
O53745	0	0	0	0	0	0	0	0	0	0	0	0	0	0	0	0	0	0	0	0	0	0	0	0	0	0	0	0	0	0	0	0	0	0	0	0	0	0	0	0	0	0	0	0	0	0	0	0	0
O53746	0	0	0	0	0	0	0	0	0	0	0	0	0	0	0	0	0	0	0	0	0	0	0	0	0	0	0	0	0	0	0	0	0	0	0	0	0	0	0	0	0	0	0	0	0	0	0	0	0
O53748	0	0	0	0	0	0	0	0	0	0	0	0	0	0	0	0	0	0	0	0	0	0	0	0	0	0	0	0	0	0	0	0	0	0	0	0	0	0	0	0	0	0	0	0	0	0	0	0	0
O53749	0	0	1	0	1	0	0	0	0	0	0	0	1	0	0	0	0	0	0	0	3	0	2	1	7	3	2	3	1	4	1	5	0	1	1	1	0	0	1	2	0	0	2	1	0	0	2	2	0
O53750	0	0	1	0	0	0	0	0	0	0	0	0	0	0	0	0	0	0	0	0	2	3	2	4	12	2	5	1	1	6	4	10	1	1	0	15	11	0	7	6	1	1	4	4	0	2	7	8	0
O53751	0	3	0	0	0	0	0	0	0	0	0	0	0	1	1	0	0	0	0	0	0	1	0	1	1	0	0	0	0	0	0	0	2	1	0	0	1	0	1	2	0	0	0	0	0	0	0	0	0
O53753	2	3	7	11	6	0	8	5	2	4	5	6	9	1	1	0	5	0	0	0	1	0	5	5	4	2	4	1	0	2	2	3	0	2	2	1	1	0	3	4	0	0	0	0	0	0	3	3	0
O53756	0	0	3	0	1	0	0	1	0	1	0	2	1	0	0	0	1	0	0	0	0	0	0	0	0	1	0	0	0	0	0	0	0	0	0	0	0	0	0	0	0	0	0	0	0	0	0	0	0
O53757	0	0	0	0	0	0	0	0	0	0	0	0	1	0	0	0	0	0	0	0	29	1	12	26	13	5	5	4	3	15	14	25	2	20	7	16	7	0	11	11	0	0	12	10	5	0	24	25	0
O53758	0	0	0	0	0	0	0	0	0	0	0	0	0	0	0	0	0	0	0	0	1	0	1	1	0	0	1	0	0	0	0	0	0	0	0	1	1	0	0	0	0	0	1	1	0	0	1	1	0
O53759	0	0	1	0	0	0	0	0	0	0	0	0	0	0	0	0	0	0	0	0	7	3	6	4	11	4	9	2	2	7	4	11	0	1	1	16	12	0	8	6	2	2	8	6	0	2	9	8	0
O53762	7	36	14	9	10	0	15	9	4	8	7	26	4	3	3	2	14	0	0	1	9	4	6	7	5	2	5	1	1	2	4	6	0	12	1	0	0	2	3	3	1	0	3	1	2	2	12	13	0
O53764	1	30	4	6	2	0	8	2	2	5	3	6	12	9	6	1	3	0	0	2	13	0	3	2	7	1	1	3	2	3	4	3	2	2	5	1	1	0	6	9	0	0	12	14	0	2	2	5	0
O53766	0	0	0	0	0	0	0	0	0	0	0	0	0	0	0	0	0	0	0	0	0	0	0	0	0	0	0	0	0	0	0	0	0	0	0	0	0	0	0	0	0	0	0	0	0	0	0	1	0
O53767	1	2	1	1	1	1	2	1	0	1	2	2	2	1	1	1	3	1	1	2	2	2	2	1	1	2	2	2	1	2	2	2	1	1	2	2	3	1	2	2	1	1	0	1	1	1	1	1	1
O53768	2	5	4	4	4	0	1	3	1	3	1	7	5	0	0	1	4	1	1	4	5	1	1	2	3	2	3	2	2	2	2	1	1	2	3	1	1	0	1	5	0	0	3	5	3	2	4	3	0
O53769	0	0	0	0	0	0	0	0	0	0	0	0	0	0	0	0	0	0	0	0	0	0	0	0	0	0	0	0	0	0	0	0	0	0	0	0	0	0	0	0	0	0	0	0	0	0	0	0	0
O53770	1	3	3	2	5	0	8	1	1	2	2	3	3	1	1	1	2	0	0	1	1	1	2	2	0	1	2	1	1	1	1	1	0	0	1	1	1	0	1	1	0	0	1	1	1	0	1	2	0
O53771	0	0	0	0	0	0	0	0	1	0	0	0	5	1	0	0	0	0	0	0	0	0	0	1	0	1	0	1	1	0	0	0	0	0	1	1	0	0	1	1	0	0	0	0	0	0	1	2	0
O53772	2	23	3	3	2	1	5	5	1	3	4	8	5	8	8	0	4	1	0	3	14	0	6	6	3	1	3	3	0	3	3	6	0	4	3	0	1	0	3	2	1	1	6	7	1	0	8	10	0
O53773	1	0	1	0	2	0	3	1	1	1	1	1	1	0	0	0	1	0	0	0	11	2	3	4	9	1	5	3	1	7	7	16	1	4	5	8	8	1	9	17	0	0	9	8	1	2	21	20	0
O53776	0	1	1	0	1	0	0	0	0	1	1	0	0	0	0	0	0	0	0	0	0	0	0	0	0	0	0	0	0	0	0	0	0	0	0	1	0	0	0	0	0	0	0	0	1	0	0	0	0
O53777	0	0	0	0	0	0	0	0	0	0	0	0	0	0	0	0	0	0	0	0	0	0	0	0	0	0	0	0	0	0	0	0	0	0	0	0	0	0	0	0	0	0	0	0	0	0	0	0	0
O53778	0	0	0	0	0	0	0	0	0	0	0	0	0	0	0	0	0	0	0	0	0	0	0	0	0	0	0	0	0	0	0	0	0	0	0	0	0	0	0	0	0	0	0	0	0	0	0	0	0
O53779	0	0	0	0	0	0	0	0	0	0	0	0	0	0	0	0	0	0	0	0	2	0	0	0	0	0	0	0	0	0	0	0	0	0	0	0	0	0	0	0	0	0	1	1	2	0	0	0	0
O53780	0	0	0	0	0	0	0	0	0	0	0	0	0	0	0	0	0	0	0	0	0	0	0	0	0	0	0	0	0	0	0	0	0	0	0	0	0	0	0	0	0	0	0	0	0	0	0	0	0
O53781	2	0	0	0	2	0	3	7	1	0	0	8	2	0	0	0	3	0	0	0	0	0	1	0	2	0	0	0	0	0	0	0	0	0	0	1	0	0	0	1	0	0	1	0	0	0	0	0	0
O53782	0	0	0	0	0	0	0	0	0	0	0	0	0	0	0	0	0	0	0	0	0	0	0	2	0	0	1	0	0	0	0	0	0	0	0	0	0	0	0	0	0	0	0	0	0	0	2	0	0
O53784	6	2	8	35	8	3	17	7	3	7	6	14	15	5	6	1	8	0	0	1	8	0	12	11	11	3	9	3	3	12	12	11	7	14	13	8	1	1	15	12	2	3	9	5	5	9	5	4	0
O53786	0	0	0	0	0	0	0	0	0	0	0	0	0	0	0	0	0	0	0	0	0	0	1	0	0	0	1	0	0	0	0	1	0	0	0	0	0	0	1	2	0	0	0	0	0	0	0	0	0
O53787	0	0	0	0	0	0	0	0	0	0	0	0	0	0	0	0	0	0	0	0	0	0	0	0	0	0	0	0	0	0	0	0	0	0	0	0	0	0	0	0	0	0	0	0	0	0	0	0	0
O53788	0	0	0	0	0	0	0	0	0	0	0	0	0	0	0	0	0	0	0	0	0	0	0	0	0	0	0	0	0	0	0	0	0	0	0	0	0	0	0	0	0	0	0	0	0	0	0	0	0
O53789	0	0	0	0	0	0	0	0	0	0	0	0	1	0	0	0	0	0	0	0	24	2	12	20	11	4	3	5	3	14	13	24	2	17	4	11	6	0	8	10	0	0	10	10	5	0	18	23	0
O53793	6	10	11	4	5	0	8	17	7	7	4	22	8	3	2	1	9	1	1	2	2	0	1	1	3	3	7	4	7	2	2	7	1	2	1	3	1	0	1	1	0	0	2	2	1	0	5	5	0
O53801	0	0	0	0	0	0	0	0	0	0	0	0	0	0	0	0	0	0	0	0	0	0	0	0	0	1	0	0	0	0	0	0	0	0	0	0	0	0	0	0	0	0	0	0	0	0	1	0	0
O53802	0	0	0	0	0	0	0	0	0	0	0	0	0	0	0	0	0	0	0	0	0	0	0	0	0	0	0	0	0	0	0	0	0	0	0	0	0	0	0	0	0	0	0	0	0	0	0	0	0
O53803	0	0	0	0	0	0	0	0	0	0	0	0	0	0	0	0	0	0	0	0	0	0	0	0	0	0	0	0	0	0	0	0	0	0	0	0	0	0	0	0	0	0	0	0	0	0	0	0	0
O53804	0	0	0	0	0	0	0	0	0	0	0	0	0	0	0	0	0	0	0	0	5	0	0	0	0	0	0	0	0	0	0	0	0	0	1	1	0	0	0	0	0	0	6	0	0	0	0	0	0
O53806	0	0	0	0	0	0	0	0	0	0	0	0	0	0	0	0	0	0	0	0	0	0	0	0	0	0	0	0	0	0	0	0	0	0	0	0	0	0	0	0	0	0	0	0	0	0	0	0	0
O53807	0	0	0	0	0	0	0	0	0	0	0	0	0	0	0	0	0	0	0	0	0	0	0	0	0	0	1	0	0	0	0	0	0	0	0	0	0	0	0	0	0	0	0	0	0	0	1	1	0
O53808	0	0	0	0	0	0	0	0	0	0	0	0	0	0	0	0	0	0	0	0	0	0	0	0	0	1	0	0	0	0	0	0	0	0	0	0	0	0	0	0	0	0	0	0	0	0	1	1	0
O53810	0	0	0	0	0	0	0	0	0	0	0	0	0	0	0	0	0	0	0	0	0	0	0	0	0	0	0	0	0	0	0	0	0	0	0	0	0	0	0	0	0	0	0	0	0	0	0	0	0
O53811	0	0	0	0	0	0	0	0	0	0	0	0	0	0	0	0	0	0	0	0	0	0	0	0	0	0	0	0	0	0	0	0	0	0	0	0	0	0	0	0	0	0	0	0	0	0	0	0	0
O53812	0	0	0	0	0	0	0	0	0	0	0	0	0	0	0	0	0	0	0	0	0	0	0	0	0	0	0	0	0	0	0	0	0	0	0	0	0	0	0	0	0	0	0	0	0	0	0	0	0
O53813	0	0	0	0	0	0	0	0	0	0	0	0	0	0	0	0	0	0	0	0	0	0	0	0	0	0	0	0	0	0	0	0	0	0	0	0	0	0	0	0	0	0	0	0	0	0	0	0	0
O53815	12	10	23	29	18	0	29	17	13	15	11	34	19	5	5	0	20	0	0	1	2	1	21	26	5	4	12	0	0	5	4	14	0	22	3	1	3	0	8	10	0	0	2	2	0	0	9	9	0
O53816	11	20	26	20	20	1	32	19	8	18	11	35	27	6	7	0	45	0	0	9	5	3	13	25	10	9	11	3	2	11	9	20	1	7	4	3	4	0	4	4	1	1	5	5	1	2	33	27	0
O53823	3	2	4	2	6	0	3	3	2	3	1	4	1	2	2	0	3	0	0	1	7	0	2	2	5	3	4	4	4	4	4	2	4	3	5	4	3	1	5	5	2	3	4	4	5	4	2	2	0
O53824	0	0	0	0	0	0	0	0	0	0	0	0	0	0	0	0	0	0	0	0	0	0	0	0	0	1	0	0	0	0	0	0	0	0	0	0	0	0	0	0	0	0	0	0	0	0	1	1	0
O53825	4	4	6	5	6	0	8	9	4	5	1	8	6	3	3	2	10	1	1	2	2	1	2	1	3	2	3	1	1	2	2	7	1	2	2	1	1	0	2	2	1	1	2	2	3	0	6	4	0
O53827	1	1	2	5	1	0	1	0	0	1	0	1	1	0	0	0	1	0	0	0	0	0	0	0	0	0	0	0	0	0	0	0	0	0	0	0	0	0	0	0	0	0	0	0	0	0	1	1	0
O53828	15	68	25	29	21	8	41	24	18	22	14	38	29	24	23	4	31	6	7	8	7	2	7	2	5	4	4	3	3	3	6	3	3	6	4	1	2	1	11	10	1	1	11	8	1	6	8	7	1
O53829	0	0	0	0	0	0	0	0	0	0	0	0	0	0	0	0	0	0	0	0	0	0	0	0	0	1	0	0	0	0	0	0	0	0	0	0	0	0	0	0	0	0	0	0	0	0	0	0	0
O53830	0	0	0	0	0	0	0	0	0	0	0	1	3	1	0	0	0	0	0	0	58	2	25	12	34	16	13	4	3	22	19	25	3	20	14	31	23	0	32	36	2	2	56	51	1	27	16	19	0
O53831	5	9	8	5	6	2	6	9	6	6	5	15	6	5	5	0	10	0	1	3	9	2	4	2	6	2	3	1	1	8	5	7	1	2	3	6	6	0	1	1	0	0	6	5	2	0	5	5	0
O53832	1	10	5	9	5	0	5	1	2	5	2	7	7	1	1	0	8	0	0	0	21	16	24	16	14	12	17	16	16	28	25	108	12	8	14	45	32	5	14	16	3	4	32	32	7	7	31	28	5
O53834	1	3	17	1	8	0	8	0	1	15	11	27	5	0	0	0	17	0	1	0	3	0	1	0	1	5	0	0	0	0	0	0	0	0	0	4	2	0	1	1	0	0	2	2	0	0	5	5	0
O53835	4	8	5	4	7	3	5	6	2	4	6	9	4	8	8	2	5	2	2	4	2	1	3	3	1	0	1	3	3	3	3	2	2	3	2	1	2	1	1	1	1	1	2	2	1	1	1	1	0
O53836	0	0	0	0	0	0	0	0	0	0	0	0	0	0	0	0	0	0	0	0	0	0	0	1	2	1	0	0	1	1	1	1	0	1	2	0	0	0	0	1	0	0	0	0	0	0	2	4	0
O53837	0	0	0	0	0	0	0	0	0	0	0	0	0	0	0	0	0	0	0	0	0	0	0	0	0	0	0	0	0	0	0	0	0	0	0	0	0	0	0	0	0	0	0	0	0	0	2	2	0
O53838	0	0	0	0	0	0	0	0	0	0	0	0	0	0	0	0	0	0	0	0	9	2	2	3	7	0	5	3	1	4	4	12	1	4	5	8	9	1	6	10	0	0	9	8	1	2	19	14	0
O53839	2	8	2	5	2	1	6	3	2	3	2	3	4	4	4	0	3	2	2	3	3	3	4	2	2	1	1	2	2	3	3	1	2	2	1	3	2	2	2	2	2	2	4	4	2	1	4	5	1
O53840	0	0	0	0	0	0	0	0	0	0	0	0	0	0	0	0	0	0	0	0	1	0	0	0	0	0	1	0	0	0	0	0	0	0	0	3	0	0	0	0	0	0	7	6	0	0	0	0	0
O53841	1	5	2	1	2	0	5	1	1	2	2	4	2	3	1	1	2	4	4	2	5	0	1	1	0	0	0	0	1	0	0	0	0	1	0	0	0	0	1	0	0	0	2	0	0	0	0	1	0
O53842	0	0	0	0	0	0	0	0	0	0	0	0	0	0	0	0	0	0	0	0	0	0	0	0	0	0	0	0	0	0	0	0	0	0	0	0	0	0	0	0	0	0	1	0	0	0	0	0	0
O53846	0	0	0	0	0	0	0	0	0	0	0	0	0	0	0	0	0	0	0	0	0	0	0	0	0	0	0	0	0	0	0	0	0	0	0	0	0	0	0	0	0	0	0	0	0	0	0	0	0
O53848	0	0	0	0	0	0	0	0	0	0	0	0	0	0	0	0	0	0	0	0	0	0	0	0	0	0	0	0	0	0	0	0	0	0	0	0	0	0	0	0	0	0	0	0	0	0	0	0	0
O53849	0	0	0	0	0	0	0	0	0	0	0	0	0	0	0	0	0	0	0	0	0	0	0	0	0	0	0	0	0	0	0	0	0	0	0	0	0	0	0	0	0	0	0	0	0	0	0	0	0
O53850	0	0	0	0	0	0	0	0	0	0	0	0	0	0	0	0	0	0	0	0	1	0	0	0	1	0	0	0	0	0	0	0	1	0	0	0	0	0	0	0	0	0	1	1	0	0	0	0	0
O53851	16	49	32	17	26	4	43	20	14	25	23	59	41	32	35	4	39	3	5	7	49	1	15	10	20	5	17	7	5	14	13	19	5	15	20	18	9	3	31	23	7	4	33	33	8	7	8	18	0
O53852	16	111	30	14	23	4	50	39	12	27	15	55	23	23	23	3	43	1	2	10	30	3	19	18	18	5	12	2	5	15	13	30	2	23	12	4	4	1	17	21	2	3	23	27	2	5	26	24	0
O53854	32	25	28	31	23	0	35	67	32	21	12	33	32	9	11	1	39	0	0	9	11	2	29	36	19	11	24	7	7	26	23	26	6	6	7	5	1	1	14	9	1	1	10	13	2	6	54	51	0
O53855	5	8	4	5	2	0	4	5	3	3	3	3	3	3	2	2	7	1	1	1	1	1	0	1	2	3	2	0	0	2	1	3	1	0	1	1	0	2	2	2	1	1	1	1	0	0	3	5	1
O53856	0	2	0	0	0	0	0	0	0	0	1	0	6	1	2	0	0	0	0	1	78	0	33	15	56	22	10	4	5	46	34	29	3	22	23	43	21	2	58	66	2	2	85	81	0	19	24	30	0
O53857	0	0	0	0	0	0	0	0	0	0	1	0	0	0	0	0	0	0	0	0	5	0	11	0	13	6	3	1	1	8	5	3	0	4	8	7	1	0	16	23	0	0	5	6	0	0	10	10	0
O53858	7	43	7	1	9	0	9	9	4	5	4	10	4	0	1	0	6	0	0	3	0	0	1	1	4	1	1	2	2	1	0	2	0	2	1	0	0	0	1	4	0	0	1	2	1	0	4	4	0
O53859	0	0	0	0	0	0	0	0	0	0	0	0	0	0	0	0	0	0	0	0	0	0	0	0	0	0	0	0	0	0	0	0	0	0	0	0	0	0	0	0	0	0	0	0	0	0	0	0	0
O53861	59	57	44	57	46	1	83	92	52	45	18	63	78	16	15	1	63	1	1	15	14	2	31	42	21	12	24	8	8	27	21	31	9	8	7	10	3	1	18	17	1	2	13	16	2	8	64	66	0
O53862	0	0	0	0	0	0	0	0	0	0	0	0	0	0	0	0	0	0	0	0	1	0	0	0	0	0	0	0	0	0	0	1	0	0	0	0	0	0	0	0	0	0	2	0	0	0	0	0	0
O53863	42	88	68	48	54	2	119	63	34	49	28	80	62	9	11	1	65	1	0	7	28	4	26	31	24	7	37	3	9	16	16	62	5	24	8	3	5	1	19	19	2	3	22	27	2	2	36	35	0
O53864	15	51	18	23	21	4	26	32	16	19	9	44	34	11	12	3	29	3	3	6	15	0	15	11	8	4	12	3	2	10	13	11	1	9	11	0	0	1	13	13	0	0	14	22	2	2	14	18	0
O53865	1	6	5	3	1	1	5	1	1	2	0	6	6	2	2	1	3	0	0	7	3	0	3	3	3	2	5	2	2	4	3	4	2	2	1	3	2	1	3	2	0	0	3	3	1	3	10	9	0
O53866	0	2	0	0	0	0	1	0	0	0	0	0	1	1	1	0	0	0	0	0	3	0	1	0	0	0	2	1	0	1	1	1	0	0	1	0	0	0	2	2	1	1	1	2	0	0	2	4	0
O53867	2	0	3	2	6	0	3	3	2	2	1	3	2	0	0	0	3	0	0	0	0	0	8	3	0	0	5	0	0	1	0	1	0	2	0	1	2	0	1	1	0	0	0	0	0	0	4	2	0
O53868	0	0	0	0	0	0	0	0	0	0	0	0	0	1	0	0	0	0	0	0	0	0	0	0	0	0	1	0	0	0	0	0	0	0	1	0	0	0	1	1	1	0	0	0	0	0	0	1	0
O53869	0	0	0	0	0	0	0	0	0	0	0	0	0	1	1	0	0	0	0	0	0	0	0	0	0	0	1	0	0	0	0	0	0	0	1	0	0	0	1	1	1	0	0	0	0	0	0	1	0
O53870	5	37	16	7	7	0	16	7	3	8	9	17	12	9	8	0	14	0	0	6	9	0	15	12	16	8	9	4	6	11	8	11	8	8	8	14	9	1	13	10	2	1	13	14	5	7	14	15	0
O53871	5	6	7	6	7	0	11	9	6	6	5	16	9	1	1	1	19	0	0	2	1	1	6	9	3	2	5	1	0	3	3	5	0	7	4	1	3	0	4	4	0	0	0	0	0	0	8	7	0
O53872	9	17	18	20	16	0	23	14	9	15	9	32	22	3	4	0	24	0	0	1	3	0	15	16	9	5	12	2	1	8	8	7	1	9	3	1	2	1	7	7	0	0	1	1	0	0	8	9	0
O53873	60	118	86	70	88	37	123	110	46	76	95	150	73	68	60	46	116	41	42	58	15	8	13	6	8	7	8	11	10	18	19	9	11	12	8	14	9	6	13	17	3	3	25	23	6	9	14	16	3
O53874	1	2	1	1	2	1	1	1	1	1	1	1	1	1	1	1	1	1	1	1	0	0	2	1	0	0	0	0	0	1	2	3	0	0	0	0	0	0	0	0	0	0	2	0	0	0	2	2	0
O53875	0	0	0	0	0	0	0	0	0	0	0	0	0	0	0	0	0	0	0	0	0	0	0	0	0	0	0	0	0	0	0	0	0	0	0	0	0	0	0	0	0	0	0	0	0	0	0	0	0
O53877	1	3	3	3	2	0	4	1	1	2	1	4	2	1	1	0	7	0	0	1	4	0	4	2	3	3	3	2	2	5	5	3	1	2	5	6	9	1	5	5	0	0	3	3	2	3	1	2	0
O53878	1	1	1	1	1	0	0	1	1	1	1	3	2	1	2	0	2	0	0	0	1	0	1	1	1	1	1	1	1	1	1	1	0	1	1	0	0	0	1	1	0	0	1	1	1	1	1	1	0
O53879	0	0	0	0	0	0	0	0	0	0	0	0	0	0	0	0	0	0	0	0	0	0	0	0	0	2	0	0	0	0	0	0	0	0	0	0	0	0	0	0	0	0	0	0	0	0	1	2	0
O53880	0	0	0	1	0	0	1	0	0	1	0	1	0	1	1	0	0	0	0	0	1	0	1	0	1	1	1	0	0	0	0	0	0	0	1	0	0	0	0	1	0	0	1	1	0	0	1	1	0
O53882	0	0	0	0	2	0	2	0	0	0	0	0	0	0	0	0	0	0	0	1	0	1	0	0	0	0	0	0	1	1	1	0	0	0	0	0	0	0	0	0	0	0	0	0	0	0	1	1	0
O53883	3	4	10	5	10	1	8	4	1	7	0	19	3	2	3	0	20	1	1	0	0	1	2	3	5	3	3	2	1	5	5	6	0	4	2	2	2	1	5	5	1	1	0	1	1	1	4	5	1
O53892	0	0	0	0	0	0	0	0	0	0	0	0	0	0	0	0	0	0	0	0	0	0	0	0	0	0	0	0	0	0	0	0	0	0	0	0	0	0	0	0	0	0	0	0	0	0	0	0	0
O53894	0	6	0	0	0	0	0	0	0	0	1	1	6	3	2	0	0	0	0	1	93	2	39	14	52	18	19	6	5	42	33	36	4	27	22	41	27	1	65	79	3	3	92	89	3	35	17	19	0
O53895	0	9	0	0	0	1	0	0	0	0	1	0	3	1	2	0	0	0	0	0	80	2	49	14	50	9	15	4	3	33	26	41	4	27	17	35	23	3	75	89	2	3	109	106	3	8	10	14	0
O53896	1	17	3	0	5	0	61	2	2	5	2	11	1	6	5	1	7	1	1	1	23	2	3	2	3	4	2	3	2	2	2	3	4	3	3	1	1	2	7	7	1	1	4	5	1	1	5	5	0
O53897	1	2	3	3	2	0	4	1	1	2	1	4	2	1	1	0	7	0	0	1	4	0	4	2	3	3	3	2	2	5	5	3	1	2	5	6	9	1	5	5	0	0	3	3	2	3	1	2	0
O53899	0	1	0	1	0	0	0	0	0	0	0	0	4	0	1	0	0	0	0	0	19	15	28	17	15	10	21	16	17	28	23	112	11	8	15	48	29	5	16	14	3	2	28	26	7	9	34	30	7
O53900	0	0	0	0	0	0	0	0	0	0	0	0	2	0	0	0	0	0	0	0	10	4	5	3	56	4	4	4	5	7	7	7	3	4	6	6	9	2	12	9	1	1	11	11	2	4	3	4	0
O53901	12	23	23	12	18	3	25	18	7	14	17	20	26	13	17	3	17	0	0	4	19	4	17	17	21	6	18	3	7	16	15	35	5	22	9	5	6	3	18	16	5	4	32	36	3	3	18	16	0
O53902	0	0	0	0	0	0	0	0	0	0	0	0	0	0	0	0	0	0	0	0	0	0	0	0	0	0	0	0	0	0	0	0	0	0	0	0	0	0	0	0	0	0	0	0	0	0	0	0	0
O53903	23	56	38	34	30	4	52	46	20	30	13	80	48	12	14	6	48	4	3	10	15	0	19	14	9	5	13	3	2	14	16	12	2	12	12	0	0	1	15	15	0	0	15	23	3	3	17	20	0
O53904	8	33	18	12	17	2	26	7	1	14	10	25	8	7	7	0	18	0	0	16	13	0	7	11	13	7	10	2	6	4	4	23	2	4	5	5	0	0	13	17	1	1	12	12	1	2	20	24	0
O53905	0	0	3	0	1	0	4	0	0	1	1	0	1	0	0	0	0	0	0	0	3	0	2	1	8	3	2	2	1	4	1	5	0	1	1	1	1	0	1	2	0	0	2	1	0	0	2	2	0
O53907	4	12	4	4	6	0	5	9	6	5	2	8	4	8	7	0	4	0	0	3	4	0	1	2	1	2	5	2	2	3	3	10	1	2	3	0	0	0	3	2	1	1	3	3	2	2	3	3	0
O53908	0	2	0	0	0	0	0	0	0	0	2	0	3	2	2	0	0	0	0	1	2	0	2	2	2	2	2	2	2	2	2	2	2	2	2	2	0	0	2	2	0	0	2	2	2	4	2	2	0
O53910	0	7	0	0	1	1	1	0	0	0	0	0	0	0	0	1	0	0	0	1	1	0	0	0	1	0	0	0	0	1	1	1	0	0	0	0	0	0	0	0	0	0	1	1	0	0	0	0	0
O53911	6	13	9	4	8	1	9	14	5	6	6	22	5	5	3	4	14	3	3	4	11	1	4	3	11	2	6	3	4	6	5	4	1	7	8	8	3	2	8	7	2	2	10	10	6	4	6	5	0
O53915	3	5	5	3	3	1	8	6	3	3	7	5	5	15	16	2	5	1	1	5	6	5	8	9	6	2	5	5	3	6	10	12	3	4	6	15	10	1	7	6	1	0	10	9	1	6	12	13	1
O53916	8	6	4	7	3	1	6	10	3	4	7	6	8	17	17	2	5	1	0	5	18	12	22	18	19	10	22	21	23	32	31	91	12	14	20	35	30	4	19	23	2	2	34	34	2	12	36	32	5
O53917	0	0	0	0	0	0	0	0	0	0	0	0	0	0	0	0	0	0	0	0	2	0	1	0	0	0	0	0	0	0	0	0	0	0	0	0	0	0	0	0	0	0	2	2	0	0	1	2	0
O53918	0	0	0	0	0	0	0	0	0	0	0	0	0	0	0	0	0	0	0	0	0	0	0	0	0	0	0	0	0	0	0	0	0	0	0	0	0	0	0	0	0	0	0	0	0	0	0	0	0
O53919	21	16	19	38	14	2	32	54	25	16	5	26	11	12	10	1	19	0	0	10	1	0	7	21	7	3	5	1	2	3	3	7	1	2	3	2	0	0	3	2	0	0	0	0	0	0	8	13	0
O53920	2	0	4	0	7	0	4	3	2	4	1	7	2	1	0	0	9	0	0	0	3	0	2	1	5	2	0	1	1	1	1	3	1	3	2	1	1	0	4	2	0	0	2	2	2	4	4	4	0
O53921	4	10	4	2	2	0	4	4	2	2	3	4	8	2	5	0	2	0	0	3	16	6	6	8	14	2	8	5	5	9	7	15	2	11	11	13	12	2	11	16	1	0	18	16	4	6	32	27	1
O53922	19	30	42	27	34	2	71	35	12	32	9	64	32	8	10	3	46	3	3	2	25	2	8	2	16	2	5	2	2	7	8	9	0	8	10	4	4	0	8	13	0	0	17	18	2	4	2	2	0
O53923	6	9	10	5	8	1	10	13	5	7	6	22	5	6	2	4	14	3	3	4	11	0	4	3	9	2	5	1	3	5	5	3	2	5	7	5	3	2	10	7	2	2	9	9	6	2	6	4	0
O53924	6	37	10	19	9	3	9	11	7	10	10	11	11	13	9	3	13	2	4	8	15	1	6	3	9	6	7	5	5	10	9	5	6	8	10	6	4	3	10	10	4	4	18	16	5	6	12	11	1
O53925	0	0	0	0	0	0	0	0	0	0	0	0	0	0	0	0	0	0	0	0	0	0	0	0	0	0	0	0	0	0	0	0	0	0	0	0	0	0	0	0	0	0	0	0	0	0	0	0	0
O53926	12	10	23	28	17	0	28	16	12	15	11	34	19	5	4	0	19	0	0	1	4	1	21	26	5	4	12	0	0	5	4	13	0	22	3	1	3	0	8	10	0	0	2	2	0	0	8	9	0
O53927	31	78	43	45	35	1	64	49	28	32	24	55	45	8	8	1	50	0	0	7	26	4	28	31	25	8	39	4	10	17	16	62	6	23	10	3	5	1	23	20	3	3	18	24	3	3	36	34	0
O53929	0	5	0	0	0	0	0	0	0	0	0	0	3	0	0	0	0	0	0	0	0	0	2	0	2	0	2	0	2	0	0	1	0	0	0	3	4	0	0	0	0	0	1	1	0	0	1	1	0
O53930	0	0	0	0	0	0	0	0	0	0	0	0	0	0	0	0	0	0	0	0	0	0	0	0	0	0	0	0	0	0	0	0	0	0	0	0	0	0	0	0	0	0	0	0	0	0	0	0	0
O53931	0	0	0	0	0	0	0	0	0	0	0	0	0	0	0	0	0	0	0	0	0	0	0	0	0	0	0	0	0	0	0	0	0	0	0	0	0	0	0	0	0	0	0	0	0	0	0	0	0
O53933	0	0	0	0	0	0	0	0	0	0	0	0	0	0	0	0	0	0	0	0	0	0	0	0	0	0	0	0	0	0	0	0	0	0	0	0	0	0	0	0	0	0	0	0	0	0	0	0	0
O53934	0	0	0	0	0	0	0	0	0	0	0	0	0	0	0	0	0	0	0	0	0	0	0	0	0	1	0	0	0	0	0	0	0	0	0	0	0	0	0	0	0	0	0	0	0	0	1	1	0
O53935	0	0	0	0	0	0	0	0	0	0	0	0	0	0	0	1	0	0	0	0	0	1	1	1	1	3	1	1	1	1	1	2	1	1	1	1	1	1	1	1	1	1	2	2	1	1	3	3	0
O53937	0	0	0	0	0	0	0	0	0	0	0	0	0	0	0	0	0	0	0	0	0	0	0	0	0	1	0	0	0	0	0	0	0	0	0	0	0	0	0	0	0	0	0	0	0	0	2	2	0
O53943	0	0	0	0	0	0	0	0	0	0	0	0	0	0	0	0	0	0	0	0	0	0	0	0	0	0	0	0	0	0	0	0	0	0	0	0	0	0	0	0	0	0	0	0	0	0	0	0	0
O53944	0	0	0	0	0	0	0	0	0	0	0	0	0	0	0	0	0	0	0	0	0	0	0	0	0	0	0	0	0	0	0	0	0	0	0	0	0	0	0	0	0	0	0	0	0	0	0	0	0
O53945	6	65	9	6	10	0	13	7	5	10	4	24	12	2	1	2	19	0	0	4	3	0	2	2	1	3	1	1	0	2	1	0	0	0	1	2	1	0	2	2	0	0	8	8	2	0	6	8	0
O53946	0	0	0	0	0	0	0	0	0	0	0	0	0	0	0	0	0	0	0	0	0	0	0	0	0	0	0	0	0	0	0	0	0	0	0	0	0	0	0	0	0	0	0	0	0	0	0	0	0
O53948	0	0	0	0	0	0	0	0	0	0	0	0	0	0	0	0	0	0	0	0	0	0	0	0	0	0	0	0	0	0	0	0	0	0	0	0	0	0	0	0	0	0	0	0	0	0	0	0	0
O53953	0	0	0	0	0	0	0	0	0	0	0	0	0	0	0	0	0	0	0	0	0	0	0	0	0	0	0	0	0	0	0	0	0	0	0	0	0	0	0	0	0	0	0	0	0	0	0	0	0
O53954	0	0	0	0	0	0	0	0	0	0	0	0	0	0	0	0	0	0	0	0	0	0	0	0	0	0	0	0	0	0	0	0	0	0	0	0	0	0	0	0	0	0	0	0	0	0	0	0	0
O53961	0	9	0	0	0	0	0	0	0	0	0	0	0	0	0	0	0	0	0	0	4	0	0	3	1	0	2	0	0	0	0	2	0	2	0	0	0	0	3	2	0	0	1	3	0	0	4	1	0
O53962	6	11	15	9	12	1	11	7	5	12	3	17	8	6	5	1	20	0	0	2	5	1	3	4	5	2	3	1	2	3	3	2	3	7	2	2	1	0	9	10	1	1	7	6	2	4	4	5	0
O53963	0	1	0	0	0	0	0	0	0	0	1	0	0	1	1	0	0	0	0	0	0	0	1	0	1	0	0	0	0	0	0	0	0	0	0	0	0	0	0	0	0	0	0	0	0	0	0	0	0
O53965	0	1	0	0	0	0	0	0	0	0	0	0	0	1	1	0	0	0	0	0	1	0	3	1	1	0	2	1	1	1	1	1	1	0	2	0	0	1	2	1	1	1	1	1	2	1	0	0	0
O53966	0	1	0	0	0	0	0	0	0	0	0	0	0	1	1	0	0	0	0	0	1	0	3	1	1	0	2	1	1	1	1	1	1	0	2	0	0	1	2	1	1	1	1	1	2	1	0	0	0
O53968	0	2	0	0	0	0	1	0	0	0	0	0	0	1	1	0	0	0	0	0	1	0	3	2	1	0	3	1	1	3	2	1	1	2	2	0	0	1	2	1	1	1	1	1	2	2	0	0	0
O53969	0	2	0	0	0	0	1	0	0	0	0	0	1	1	1	0	0	0	0	0	1	0	3	2	1	0	3	1	1	2	2	1	1	2	2	0	0	1	2	1	1	1	1	1	2	1	0	0	0
O53970	0	2	0	0	0	0	1	0	0	1	0	0	2	1	1	0	0	0	0	0	1	0	3	2	1	0	2	1	1	1	2	1	1	2	2	0	0	1	2	1	1	1	1	1	2	1	0	0	0
O53971	0	2	0	0	0	0	1	0	0	0	0	0	1	1	1	0	0	0	0	0	1	0	3	2	1	0	2	1	1	2	2	1	1	1	2	0	0	1	2	1	1	1	1	1	2	1	0	0	0
O53972	0	2	0	0	0	0	0	0	0	0	0	0	1	1	1	0	0	0	1	0	1	0	3	2	1	0	2	1	1	3	2	1	1	2	2	0	0	1	2	1	1	1	1	1	2	1	0	0	0
O53973	0	0	0	0	0	0	0	0	0	0	0	0	0	0	0	0	0	0	0	0	0	0	0	0	0	0	0	0	0	0	0	0	0	0	0	0	0	0	0	0	0	0	0	0	0	0	0	0	0
O53974	0	0	0	0	0	0	0	0	0	0	0	0	0	0	0	0	0	0	0	0	0	0	0	0	0	0	0	0	0	0	0	0	0	0	0	0	0	0	0	0	0	0	0	0	0	0	0	0	0
O53975	0	0	0	0	0	0	0	0	0	0	0	0	0	0	0	0	0	0	0	0	0	0	0	0	0	0	0	0	0	0	0	0	0	0	0	0	0	0	0	0	0	0	0	0	0	0	0	0	0
O53976	0	0	0	0	0	0	0	0	0	0	0	0	0	0	0	0	0	0	0	0	4	0	0	0	1	1	0	0	0	0	0	0	0	0	0	5	2	0	1	0	0	0	3	3	0	0	0	0	0
O53977	0	0	0	0	0	0	0	0	0	0	0	0	0	0	0	0	0	0	0	0	0	0	0	0	0	0	0	0	0	0	0	0	0	0	0	0	0	0	0	0	0	0	0	0	0	0	0	0	0
O53978	1	5	2	1	2	1	3	4	3	2	3	2	3	0	0	0	2	0	1	2	9	0	7	4	9	2	1	2	1	3	3	3	0	5	5	0	0	0	9	10	1	1	7	9	2	2	2	3	0
O53979	17	55	34	22	22	3	43	19	13	25	29	50	37	36	40	3	37	3	5	10	55	1	21	12	26	5	19	9	5	16	15	23	5	18	24	12	10	3	34	33	7	4	33	36	8	4	14	21	0
O65931	7	0	21	4	22	0	39	12	6	17	37	23	19	0	0	0	23	0	0	0	0	0	1	1	0	0	1	1	0	1	1	1	11	1	0	0	0	0	0	2	0	0	0	2	0	1	2	4	0
O65933	7	16	17	8	14	3	19	9	3	11	7	17	18	12	17	2	12	0	0	2	11	2	8	8	11	6	5	3	3	8	7	16	2	9	5	3	2	2	11	9	3	3	17	19	3	2	9	7	0
O65934	30	64	27	25	29	2	34	50	20	20	15	49	18	15	13	1	58	0	0	11	30	13	25	17	24	16	23	16	18	25	22	79	14	8	16	40	26	8	21	26	1	0	40	36	6	6	34	28	4
O65935	0	0	0	0	0	0	0	0	0	0	0	0	0	0	0	0	0	0	0	0	0	0	0	0	0	0	0	0	0	0	0	0	0	0	0	0	0	0	0	0	0	0	0	0	0	0	0	0	0
O65936	2	31	7	2	5	1	13	5	1	8	3	19	6	10	9	1	12	2	2	3	15	0	8	6	7	1	5	3	1	5	5	8	0	5	3	1	0	0	4	3	1	1	5	6	1	0	10	12	0
O69622	0	0	0	0	0	0	0	0	0	0	0	0	0	0	0	0	0	0	0	0	0	0	0	0	0	0	0	0	0	0	0	0	0	0	0	0	0	0	0	0	0	0	0	0	0	0	0	0	0
O69623	0	0	0	0	0	0	0	0	0	0	0	0	0	0	0	0	0	0	0	0	0	0	0	0	0	0	0	0	0	0	0	0	0	0	0	0	0	0	0	0	0	0	0	0	0	0	0	0	0
O69624	0	0	0	0	0	0	0	0	0	0	0	0	0	0	0	0	0	0	0	0	0	0	0	0	0	0	0	0	0	0	0	0	0	0	0	0	0	0	0	0	0	0	0	0	0	0	0	0	0
O69625	0	0	0	0	0	0	0	0	0	0	0	0	0	0	0	0	0	0	0	0	0	0	0	0	0	1	0	0	0	0	0	0	0	0	0	0	0	0	0	0	0	0	0	0	0	0	1	1	0
O69626	0	0	0	0	0	0	0	0	0	0	0	0	0	0	0	0	0	0	0	0	0	0	0	0	0	0	0	0	0	0	0	0	0	0	0	0	0	0	0	0	0	0	0	0	0	0	0	0	0
O69628	0	0	0	0	0	0	0	0	0	0	0	0	0	0	0	0	0	0	0	0	0	0	0	0	0	1	0	0	0	0	0	0	0	0	0	0	0	0	0	0	0	0	0	0	0	0	1	1	0
O69629	5	24	12	15	16	0	25	9	5	8	5	17	8	13	10	1	15	0	0	4	7	8	10	13	10	3	9	7	7	15	14	7	12	8	11	10	8	0	9	12	0	0	13	19	3	7	14	17	3
O69630	0	0	1	1	1	0	1	1	1	1	0	2	1	0	0	0	1	0	0	0	0	1	0	0	0	0	0	1	0	0	1	3	0	0	1	0	0	0	0	1	0	0	1	0	0	1	0	0	0
O69631	1	1	2	3	4	0	1	1	1	2	0	3	2	0	0	0	3	0	0	1	19	11	29	15	13	10	22	20	16	33	29	129	12	7	15	42	26	2	11	15	3	2	31	33	6	3	32	31	6
O69632	0	0	0	0	0	0	0	0	0	0	0	0	1	0	0	0	0	0	0	0	6	1	9	4	2	2	3	5	1	9	10	45	3	1	4	18	5	1	0	0	0	0	6	8	2	1	12	11	1
O69633	0	0	0	0	0	0	0	0	0	0	0	0	1	0	0	0	0	0	0	0	6	1	10	3	2	2	2	6	1	7	7	42	3	2	4	21	5	1	0	0	0	0	5	7	2	1	12	11	2
O69634	0	0	0	0	0	0	0	0	0	0	0	0	1	0	0	0	0	0	0	0	4	1	7	3	2	1	2	8	2	11	10	31	3	2	3	14	3	1	1	1	0	0	3	5	1	1	9	8	1
O69635	19	54	31	25	24	1	49	41	18	23	10	62	43	10	12	2	38	1	1	5	15	0	18	13	9	5	12	2	2	11	13	11	1	12	12	0	0	1	13	13	0	0	15	23	3	3	16	19	0
O69636	0	0	0	0	0	0	0	2	0	0	0	0	0	0	0	0	0	0	0	0	0	0	2	0	0	0	0	0	0	0	0	0	0	0	0	0	0	0	0	0	0	0	0	0	0	0	0	1	0
O69637	0	0	0	0	0	0	0	0	0	0	0	0	0	0	0	0	0	0	0	0	0	0	0	0	1	0	0	0	0	0	0	0	0	0	0	0	0	0	1	2	0	0	0	0	0	0	2	2	0
O69638	18	93	26	12	18	3	44	34	12	22	15	43	20	18	18	2	24	1	1	9	26	3	16	16	16	4	12	2	4	12	11	26	2	23	9	3	4	1	16	20	2	3	21	26	2	2	22	19	0
O69639	1	13	3	0	5	0	60	2	1	5	2	11	1	5	5	1	6	1	1	0	10	2	3	2	3	4	2	2	2	2	2	3	4	3	3	1	1	2	7	6	1	1	4	5	1	1	4	5	0
O69640	1	5	2	2	2	0	6	3	2	4	1	6	4	1	1	0	6	0	0	1	1	0	1	1	1	2	1	0	0	3	3	1	1	2	2	1	1	0	2	2	0	0	2	2	1	1	1	3	0
O69641	3	19	4	13	5	0	3	3	4	4	6	6	6	6	5	0	5	0	1	3	11	1	5	2	8	5	5	4	4	8	7	4	4	6	6	2	4	1	9	8	3	3	13	12	2	4	9	8	0
O69643	0	0	0	0	0	0	0	0	0	0	0	0	0	0	0	0	0	0	0	0	0	0	0	0	0	0	0	0	0	0	0	0	0	0	0	0	0	0	0	0	0	0	0	0	0	0	0	0	0
O69644	19	34	42	27	34	2	72	37	13	31	10	68	34	8	9	3	49	3	3	2	25	2	8	2	16	2	5	2	2	7	8	9	0	8	10	4	4	0	8	14	0	0	17	17	2	4	2	2	0
O69645	3	12	7	5	8	0	7	6	4	6	5	12	11	5	5	2	8	1	1	2	5	2	6	4	6	3	8	2	2	4	4	7	3	7	5	7	5	1	5	8	0	0	6	6	2	2	6	6	0
O69646	1	1	3	1	2	0	2	1	1	1	1	1	1	2	3	0	1	0	0	2	3	0	5	3	5	2	2	3	2	4	3	7	1	1	1	2	2	0	1	1	0	0	1	1	1	1	8	3	0
O69648	1	7	1	2	0	1	1	2	1	1	1	1	1	1	1	1	2	1	1	1	2	0	0	0	1	2	0	0	0	1	1	1	0	1	2	5	1	0	2	2	0	0	3	3	2	0	0	1	0
O69649	0	0	0	0	0	0	0	0	0	0	0	0	0	0	0	0	0	0	0	0	0	0	0	0	0	4	0	0	0	0	0	0	0	0	0	0	0	0	0	0	0	0	0	0	0	0	3	2	0
O69651	0	4	3	5	1	0	4	0	0	4	2	1	1	0	1	0	0	0	0	1	4	0	2	3	6	1	3	2	2	1	1	3	5	1	0	4	4	1	4	7	0	0	5	4	3	2	2	1	0
O69652	2	18	2	15	6	0	7	2	2	2	6	11	6	7	6	0	8	0	0	5	5	0	9	5	4	3	3	3	3	5	4	5	2	4	4	9	6	0	6	6	0	0	9	9	2	2	7	7	0
O69653	99	281	90	80	71	0	174	88	60	60	8	166	88	11	8	0	192	0	0	3	10	0	0	0	1	2	0	0	0	0	0	4	0	2	0	0	0	0	0	0	0	0	6	4	0	0	3	5	0
O69654	0	0	0	0	0	0	0	0	0	0	0	0	0	0	0	0	0	0	0	0	0	0	0	0	0	0	0	0	0	0	0	0	0	0	0	0	0	0	0	0	0	0	0	0	0	0	0	0	0
O69655	0	4	0	0	0	0	1	0	0	0	0	0	0	0	0	0	0	0	0	0	8	0	0	1	8	3	0	0	0	1	1	0	2	0	3	2	2	0	0	1	0	0	9	7	0	0	2	1	0
O69656	0	0	0	0	0	0	0	0	0	0	0	0	0	0	0	0	0	0	0	1	0	0	1	1	1	1	1	0	0	1	1	1	1	1	1	1	1	0	1	1	0	0	0	0	0	1	0	1	0
O69657	0	0	0	0	0	0	0	0	0	0	0	0	0	0	0	0	0	0	0	0	1	0	0	0	0	0	0	0	0	0	0	0	0	0	0	0	0	0	0	0	0	0	1	1	0	0	1	1	0
O69658	0	0	0	0	0	0	0	0	0	0	0	0	0	0	0	0	0	0	0	0	1	0	0	0	0	0	0	0	0	0	0	0	0	0	0	0	0	0	0	0	0	0	1	1	0	0	1	1	0
O69659	0	0	0	0	0	0	0	0	0	0	0	0	0	0	0	0	0	0	0	0	0	0	0	0	0	0	0	0	0	0	0	0	0	0	0	0	0	0	0	0	0	0	0	0	0	0	1	1	0
O69660	15	50	33	17	26	7	34	26	13	21	17	34	13	26	29	13	26	12	13	14	17	2	13	7	17	10	14	3	7	13	11	13	9	10	17	11	14	7	20	30	5	6	17	19	9	5	12	12	2
O69661	0	0	0	0	0	0	0	0	0	0	0	0	0	0	0	0	0	0	0	0	3	0	2	0	1	2	1	0	0	2	2	1	3	2	1	0	1	0	1	1	0	0	2	2	1	0	4	4	0
O69662	0	0	0	0	0	0	0	0	0	0	0	0	1	0	0	0	0	0	0	0	1	0	0	0	0	0	0	0	0	0	0	0	0	1	0	0	0	0	0	0	0	0	1	1	0	0	1	1	0
O69663	1	0	1	1	1	0	2	1	1	1	0	2	1	0	0	0	3	0	0	0	2	1	2	2	1	1	1	0	1	1	1	1	1	3	2	1	0	0	2	2	2	1	3	3	0	2	3	3	0
O69664	6	10	11	4	5	0	8	17	7	7	4	22	8	3	2	1	9	1	1	4	2	0	1	1	3	3	7	4	7	2	2	6	1	2	1	3	1	0	1	1	0	0	2	2	1	0	5	5	0
O69665	0	0	0	0	0	0	0	0	0	0	0	0	0	0	0	0	0	0	0	0	0	0	0	0	0	0	0	0	0	0	0	0	0	0	0	0	0	0	0	0	0	0	0	0	0	0	0	0	0
O69666	1	2	2	1	1	0	1	2	1	1	1	1	1	1	0	0	1	0	0	1	1	0	1	0	0	0	1	0	0	0	0	1	0	0	2	0	1	0	1	1	0	0	1	1	0	0	3	2	0
O69667	9	39	17	13	11	1	25	11	8	12	17	24	21	22	22	2	18	1	1	3	43	0	13	7	16	3	12	5	3	11	8	17	3	9	19	7	8	0	19	16	4	2	23	24	5	3	10	14	0
O69668	5	8	5	8	6	2	7	3	3	5	12	14	13	6	5	2	9	2	2	3	7	1	4	6	7	4	4	2	2	4	3	6	4	3	3	10	7	2	6	9	2	2	8	10	3	3	10	6	1
O69669	0	0	0	0	0	0	0	0	0	0	0	0	0	0	1	0	0	0	0	0	1	0	2	0	1	0	0	0	1	0	0	0	0	1	0	0	0	0	2	1	0	0	2	2	0	0	1	1	0
O69670	2	7	4	4	5	1	5	7	3	3	3	6	4	4	3	1	4	1	1	5	4	0	4	3	2	2	2	3	3	3	3	4	1	2	3	2	2	1	4	4	2	1	4	4	2	2	3	3	0
O69671	0	0	3	0	2	0	4	2	0	2	3	3	4	1	1	0	3	0	0	0	21	0	2	1	2	0	0	0	0	1	1	1	5	1	0	0	1	2	2	2	0	0	7	5	0	1	1	1	0
O69672	0	2	0	0	0	0	0	0	0	0	0	0	0	1	0	0	0	0	0	0	1	0	1	0	0	0	1	0	0	0	0	1	0	0	1	1	1	0	1	1	0	0	1	2	0	0	3	3	0
O69673	0	0	0	0	0	0	0	0	0	0	0	0	0	0	0	0	0	0	0	0	0	0	0	0	0	0	0	0	0	0	0	0	0	0	0	0	0	0	0	0	0	0	0	0	0	0	0	0	0
O69674	0	0	0	0	0	0	0	0	0	0	0	0	0	0	0	0	0	0	0	0	0	0	0	0	0	0	0	0	0	0	0	0	0	0	0	0	0	0	0	0	0	0	0	0	0	0	0	0	0
O69675	0	0	0	0	0	0	0	0	0	0	0	0	0	0	0	0	0	0	0	0	0	0	0	0	0	0	0	0	0	0	0	0	0	0	0	0	0	0	0	0	0	0	0	0	0	0	0	0	0
O69678	0	10	5	3	8	0	7	0	0	5	3	14	8	2	4	0	12	0	0	2	4	2	4	5	1	2	1	3	3	4	4	4	1	4	6	2	2	0	3	5	1	1	0	1	2	5	3	4	1
O69679	0	0	0	0	0	0	0	0	0	0	0	0	0	0	0	0	0	0	0	0	0	0	0	0	0	2	0	2	2	1	0	0	0	0	1	2	2	0	0	1	0	0	1	1	0	0	1	2	0
O69680	0	2	0	0	0	0	0	0	0	0	2	0	1	3	3	0	0	0	0	4	3	0	2	1	1	3	1	2	0	0	0	4	3	3	4	4	2	0	2	2	0	0	4	4	2	1	4	4	0
O69681	0	0	0	0	0	0	0	0	0	0	0	0	0	0	0	0	0	0	0	0	2	0	0	0	0	0	0	1	0	0	0	1	0	1	0	1	0	0	1	2	0	0	0	1	0	0	12	7	0
O69684	0	0	0	0	0	0	0	0	0	0	0	0	0	0	0	0	0	0	0	0	3	0	1	0	2	1	1	1	2	1	1	1	1	1	1	8	5	1	2	2	0	0	6	5	1	1	0	0	0
O69685	0	0	0	0	0	0	0	0	0	0	0	0	0	0	0	0	0	0	0	0	0	0	0	0	0	0	0	0	0	0	0	0	0	0	0	0	0	0	0	0	0	0	0	0	0	0	0	0	0
O69686	2	47	7	7	6	0	5	3	3	4	4	10	7	5	4	0	7	0	0	4	3	1	8	1	2	2	4	1	1	3	2	5	1	3	4	4	0	0	6	6	0	0	5	5	1	1	5	5	0
O69687	12	42	14	12	13	1	20	18	12	11	20	28	21	26	25	3	16	3	2	6	42	1	9	7	18	3	11	5	5	10	7	16	3	11	18	12	6	2	17	20	3	2	24	29	7	3	7	14	0
O69689	5	37	14	5	6	0	14	7	3	7	10	14	12	8	7	0	11	0	0	7	6	1	15	13	10	7	8	6	4	10	8	12	7	7	9	13	8	1	12	9	2	1	9	11	5	7	13	15	0
O69690	0	0	0	0	0	0	0	0	0	0	0	0	0	0	0	0	0	0	0	0	0	0	0	0	0	0	0	0	0	0	0	0	0	0	0	0	0	0	0	0	0	0	0	0	0	0	0	0	0
O69692	20	97	20	16	25	4	46	28	13	20	21	43	24	24	19	2	29	0	0	9	35	4	9	7	23	10	17	6	7	22	17	29	10	7	11	5	2	1	27	27	3	1	26	29	5	7	28	25	0
O69693	14	35	25	12	23	2	30	11	4	17	12	27	12	9	8	0	24	0	0	14	14	0	6	10	14	7	10	2	6	6	4	25	3	7	6	5	2	0	15	19	1	1	14	13	1	3	21	25	0
O69694	0	3	1	0	1	0	2	0	0	2	0	5	1	5	5	0	2	0	0	0	6	0	2	0	2	2	1	0	0	0	0	1	0	0	0	1	1	0	0	1	0	0	7	8	0	0	0	0	0
O69695	21	28	14	13	12	0	24	22	10	15	10	27	10	14	10	1	17	0	0	23	1	1	26	27	15	10	26	4	5	19	17	24	4	5	3	1	1	0	14	13	1	1	0	2	3	3	48	51	0
O69696	18	81	34	21	23	3	42	25	17	29	26	57	42	41	40	5	42	5	6	10	65	1	18	13	33	7	25	10	8	15	13	25	8	18	24	21	17	2	36	44	5	4	35	36	16	12	11	24	0
O69697	0	0	0	0	0	0	0	0	0	0	1	0	0	0	0	0	0	0	0	0	0	0	1	0	1	2	0	0	0	0	0	2	0	0	0	0	0	0	3	6	0	0	0	0	0	0	3	3	0
O69698	2	6	7	2	4	0	4	6	3	3	5	8	3	3	3	1	7	1	1	2	0	0	2	0	3	1	1	0	1	0	0	6	0	1	0	0	0	0	4	5	0	0	0	0	1	1	2	2	0
O69699	0	0	0	0	0	0	0	0	0	0	0	0	0	0	0	0	0	0	0	0	1	0	0	0	0	0	0	0	0	0	0	0	0	0	0	0	0	0	0	0	0	0	1	1	0	0	0	0	0
O69700	4	17	13	6	9	0	21	9	3	14	3	23	9	5	3	2	14	2	2	2	6	2	3	2	3	2	3	3	4	6	7	9	4	4	3	2	4	2	5	3	0	0	3	3	1	2	8	9	1
O69702	0	0	0	0	0	0	0	0	0	0	0	0	0	0	0	0	0	0	0	0	1	0	0	0	0	0	0	0	0	0	0	0	0	0	0	0	0	0	1	1	0	0	0	0	0	0	0	0	0
O69703	0	0	0	0	0	0	0	0	0	0	0	0	1	0	0	0	0	0	0	0	23	0	13	29	3	0	8	3	4	21	17	33	1	16	1	15	12	2	5	7	0	0	22	6	0	9	17	6	0
O69704	0	1	0	0	0	0	0	0	0	0	0	0	0	0	0	0	0	0	0	1	0	0	1	0	0	1	0	1	4	2	4	0	2	0	0	3	3	0	2	2	0	0	1	1	0	3	2	2	0
O69707	2	13	0	0	0	1	0	1	0	0	1	0	4	1	1	0	0	0	0	0	3	0	4	1	1	1	0	0	0	1	1	4	0	4	0	0	0	0	1	1	0	0	6	5	0	0	0	1	0
O69708	0	4	0	0	2	0	1	0	0	0	0	1	1	0	0	0	2	0	0	0	0	0	0	5	0	0	2	0	0	0	0	0	0	7	0	0	0	1	0	0	0	0	0	0	0	0	0	0	0
O69709	0	2	0	1	0	0	1	0	0	0	1	0	1	0	0	0	0	0	0	1	0	0	0	6	0	1	2	0	0	0	2	1	0	6	0	0	0	0	0	0	0	0	0	0	0	0	0	0	0
O69710	6	38	33	28	38	5	46	23	5	22	12	53	13	14	13	5	76	4	4	10	4	8	4	4	2	3	8	1	1	5	5	5	7	3	5	5	6	0	6	6	0	0	13	18	3	4	8	12	5
O69711	0	0	0	0	0	0	0	0	0	0	0	0	0	0	0	0	0	0	0	0	8	2	1	2	4	0	5	2	1	3	3	8	1	4	5	8	9	1	5	10	0	0	8	7	1	2	12	12	0
O69712	0	0	0	0	0	0	0	0	0	0	0	0	0	0	0	0	0	0	0	0	1	0	0	1	0	0	0	0	0	0	0	0	0	0	1	0	0	0	0	0	0	0	1	1	0	0	0	0	0
O69714	0	0	0	0	0	0	0	0	0	0	0	0	0	0	0	0	0	0	0	0	0	0	0	0	0	0	0	0	0	0	0	0	0	0	0	0	0	0	0	0	0	0	0	0	0	0	0	0	0
O69715	0	0	0	0	0	0	0	0	0	0	0	0	0	0	0	0	0	0	0	0	0	0	0	0	0	0	0	0	0	0	0	0	0	0	0	0	0	0	0	0	0	0	0	0	0	0	0	0	0
O69716	0	0	0	0	0	0	0	0	0	0	0	0	0	0	0	0	0	0	0	0	0	0	0	0	0	0	1	0	0	0	0	1	0	0	0	0	0	0	0	0	0	0	0	0	0	0	0	0	0
O69717	0	0	0	0	0	0	0	0	0	0	0	0	0	0	0	0	0	0	0	0	0	0	0	0	0	0	1	0	0	0	0	0	0	0	0	2	1	0	1	1	0	0	0	0	0	0	1	1	0
O69718	0	0	0	0	0	0	0	0	0	0	0	0	0	0	0	0	0	0	0	0	0	2	3	3	4	2	4	2	3	2	6	2	2	3	3	6	5	2	4	3	2	2	2	5	1	0	6	6	0
O69719	1	8	1	4	1	0	5	1	1	2	0	2	3	3	3	0	2	2	2	3	3	2	4	3	2	1	2	2	2	3	3	1	2	2	2	2	1	1	1	2	2	2	4	4	2	0	5	5	1
O69720	0	0	0	0	0	0	0	0	0	0	0	0	0	0	0	0	0	0	0	0	0	0	0	0	0	1	0	0	0	0	0	0	0	0	0	0	0	0	0	0	0	0	0	0	0	0	0	0	0
O69721	0	2	0	0	0	0	1	0	0	0	1	0	0	1	1	0	0	0	0	0	1	1	1	1	1	1	1	1	1	1	1	2	1	1	1	1	0	0	2	1	0	0	2	1	1	1	2	3	0
O69722	0	0	0	0	0	0	0	0	0	0	0	0	0	0	0	0	0	0	0	0	6	0	8	7	1	2	3	4	4	6	4	25	4	2	5	3	5	0	3	5	1	0	7	10	0	1	10	9	0
O69723	0	0	0	0	0	0	0	0	0	0	0	0	1	0	0	0	0	0	0	0	9	3	20	14	3	6	7	7	6	9	9	51	5	4	4	15	13	0	5	6	1	1	15	18	2	3	14	15	1
O69724	1	2	0	0	1	0	1	0	0	0	0	0	3	0	0	0	0	0	0	0	22	14	29	18	15	12	21	18	19	28	23	111	13	9	15	40	30	3	15	14	3	3	32	31	7	7	33	31	5
O69725	0	0	0	0	0	0	0	0	0	0	0	0	0	0	0	0	0	0	0	0	1	0	0	0	0	0	1	0	0	0	0	6	0	0	1	1	1	0	0	1	0	0	1	1	0	0	2	1	0
O69726	0	0	0	0	0	0	0	0	0	0	0	0	0	0	0	0	0	0	0	0	0	0	0	0	0	0	0	0	0	0	0	0	0	0	0	0	0	0	0	0	0	0	0	0	0	0	1	1	0
O69727	5	7	6	7	3	0	5	2	1	4	3	9	5	3	3	0	6	0	1	0	5	1	4	4	0	1	2	2	1	1	3	4	0	3	2	3	2	0	2	3	0	0	3	3	0	0	3	4	0
O69728	1	0	2	2	4	0	2	0	0	2	1	2	4	1	1	0	2	0	0	1	1	0	5	2	6	2	2	1	1	3	3	6	3	5	2	5	3	0	6	5	0	0	0	0	4	2	5	3	0
O69729	0	9	0	0	0	1	0	0	0	0	1	0	2	1	1	0	0	0	0	1	80	2	47	14	51	9	15	4	3	33	25	41	4	27	19	36	23	3	74	89	3	3	105	100	3	9	9	14	0
O69730	0	5	0	0	0	0	0	0	0	0	1	1	6	3	2	0	0	0	0	0	88	2	42	14	56	17	17	5	5	41	31	38	4	26	22	40	26	0	65	78	3	3	86	85	4	29	18	21	0
O69731	0	0	0	0	0	0	0	0	0	0	0	0	0	0	0	0	0	0	0	0	0	0	0	0	0	0	0	0	0	0	0	0	0	0	0	0	0	0	0	0	0	0	0	0	0	0	0	0	0
O69732	0	0	0	0	0	0	0	0	0	0	0	0	0	0	0	0	0	0	0	0	0	0	0	0	0	0	0	0	0	0	0	0	0	0	0	0	0	0	0	0	0	0	0	0	0	0	0	0	0
O69733	26	115	48	35	50	15	66	58	28	39	35	63	40	41	39	24	54	22	20	26	21	4	9	8	9	8	16	7	7	8	8	11	9	7	10	12	11	9	12	16	7	7	19	20	7	9	12	11	12
O69734	0	0	0	0	0	0	1	0	0	0	0	0	0	0	0	0	0	0	0	0	0	0	0	0	0	0	0	0	0	0	0	0	0	0	0	0	0	0	0	0	0	0	0	0	0	0	0	0	0
O69735	0	0	0	0	0	0	0	0	0	0	0	0	1	0	0	1	0	0	0	0	0	1	1	1	1	2	1	1	1	1	1	4	1	1	1	1	1	1	1	1	1	1	2	1	0	1	3	3	0
O69736	0	0	0	0	0	0	0	0	0	0	0	0	0	0	0	1	0	0	0	0	0	1	1	1	1	2	1	1	1	1	1	3	1	1	1	1	1	1	1	1	1	1	1	1	0	1	3	3	0
O69740	0	0	0	0	0	0	0	0	0	0	0	0	0	0	0	0	0	0	0	0	0	0	1	0	0	3	1	0	0	0	0	0	0	0	1	0	0	0	3	3	0	0	0	0	0	0	3	6	0
O69741	0	0	0	0	0	0	0	0	0	0	0	0	0	0	0	0	0	0	0	0	0	0	0	0	0	0	0	0	0	0	0	0	0	0	0	0	0	0	0	0	0	0	0	0	0	0	0	0	0
O69742	0	0	0	0	0	0	0	0	0	0	0	0	0	0	0	0	0	0	0	0	0	0	0	0	0	0	0	0	0	0	0	0	0	0	0	0	0	0	0	0	0	0	0	0	0	0	0	0	0
O69743	0	0	0	0	0	0	0	0	0	0	0	0	0	0	0	0	0	0	0	0	0	0	0	0	0	0	0	0	0	0	0	0	0	0	0	0	0	0	0	0	0	0	0	0	0	0	0	0	0
O69744	0	0	0	0	0	0	0	0	0	0	0	0	0	0	0	0	0	0	0	0	0	0	0	0	0	0	0	0	0	0	0	0	0	0	0	0	0	0	0	0	0	0	0	0	0	0	0	0	0
O86311	12	15	17	5	14	0	14	16	4	12	6	30	9	1	2	0	34	0	0	0	21	12	23	12	20	18	28	13	15	26	25	84	11	6	13	40	23	5	21	22	2	1	27	26	5	5	37	34	3
O86312	0	0	0	0	0	0	0	0	0	0	0	0	1	0	0	0	0	0	0	0	27	2	8	33	11	5	5	4	1	15	14	26	2	16	6	17	7	0	10	13	0	0	10	10	5	0	18	20	0
O86313	0	0	0	0	0	0	0	0	0	0	0	0	0	0	0	0	0	0	0	0	0	0	2	2	1	2	1	1	1	3	2	4	0	2	3	0	0	0	2	1	0	0	0	0	0	0	0	1	0
O86314	0	0	0	0	0	0	0	0	0	0	0	0	0	0	0	0	0	0	0	0	0	0	0	1	2	1	0	0	0	0	0	1	0	0	0	0	0	0	0	1	0	0	0	0	0	0	2	1	0
O86315	0	0	0	0	0	0	0	0	0	0	0	0	1	0	0	0	0	0	0	0	1	2	0	0	1	2	1	0	0	2	2	3	0	1	2	2	1	1	1	1	1	1	2	2	2	0	1	1	0
O86316	0	0	0	0	0	0	0	0	0	0	0	0	0	0	0	0	0	0	0	0	0	0	0	0	1	0	0	0	0	0	0	0	0	0	0	0	0	0	0	0	0	0	0	0	0	0	1	1	0
O86317	0	0	0	0	0	0	0	0	0	0	0	0	0	0	0	0	0	0	0	0	0	0	0	0	0	1	0	0	0	0	0	0	0	0	0	0	0	0	0	0	0	0	0	0	0	0	1	1	0
O86318	2	6	4	5	9	1	6	4	2	4	3	8	7	2	2	1	7	0	0	2	2	2	5	5	6	2	3	2	2	3	3	4	1	4	3	2	3	2	6	6	1	1	2	2	2	2	2	3	0
O86319	12	10	22	31	17	0	29	17	12	15	11	35	19	5	5	0	20	0	0	1	3	1	21	24	5	4	12	0	0	5	4	11	0	22	3	1	3	0	8	10	0	0	2	2	0	0	8	10	0
O86320	0	1	0	0	1	0	1	0	0	0	0	0	1	0	0	0	0	0	0	0	0	0	2	1	0	0	0	0	0	0	0	0	0	1	0	2	2	0	0	0	0	0	0	0	0	0	0	0	0
O86321	0	0	0	0	0	0	0	0	0	0	0	0	0	0	0	0	0	0	0	0	0	0	0	0	0	0	0	0	0	0	0	0	0	0	0	0	0	0	0	0	0	0	0	0	0	0	0	0	0
O86322	5	12	6	2	12	0	17	12	5	4	3	11	10	5	6	0	11	0	0	6	2	0	7	4	3	2	6	2	3	6	6	15	2	4	3	6	1	0	3	3	0	0	3	3	2	2	8	6	0
O86323	0	0	0	0	0	0	0	0	0	0	0	0	0	0	0	0	0	0	0	0	2	0	0	1	6	0	1	1	1	1	1	3	2	0	0	0	0	0	3	3	0	0	0	0	0	1	1	1	0
O86325	0	0	0	0	0	0	0	0	0	0	0	0	0	2	2	0	0	0	0	0	1	0	0	1	0	0	0	1	0	0	0	0	0	1	1	0	0	0	0	0	0	0	1	1	0	0	0	0	0
O86326	0	0	0	0	0	0	0	0	0	0	0	0	0	0	0	0	0	0	0	0	0	0	0	0	0	0	0	0	0	0	0	0	0	0	0	0	0	0	0	0	0	0	0	0	0	0	0	0	0
O86327	1	2	1	1	1	0	1	2	1	1	1	2	1	2	2	0	1	0	0	0	1	1	1	1	1	1	0	1	1	1	1	1	1	1	1	1	1	1	1	1	1	1	1	1	1	1	1	1	0
O86328	2	3	4	2	4	0	5	3	0	3	1	7	1	1	1	1	3	1	1	3	2	2	1	1	2	2	1	1	1	2	2	2	2	2	2	3	3	0	2	2	2	2	3	3	2	2	2	2	0
O86329	22	54	33	32	29	2	47	43	20	28	15	71	44	12	15	2	45	3	2	8	16	0	19	15	9	6	12	3	2	15	18	15	1	12	12	0	0	1	14	13	0	0	19	28	3	3	16	19	0
O86331	0	0	0	0	0	0	0	0	0	0	0	0	1	0	0	0	0	0	0	0	1	0	15	19	6	4	9	4	4	10	8	39	1	4	2	20	7	0	2	1	0	0	3	2	0	1	30	32	0
O86332	0	0	0	0	0	0	0	0	0	0	1	0	0	1	1	0	0	0	0	0	0	0	0	2	1	0	2	1	1	2	3	2	0	1	0	0	0	0	0	0	0	0	0	0	0	1	2	5	0
O86333	17	12	38	18	47	0	56	42	11	26	7	57	60	2	3	0	55	0	0	0	33	1	2	0	17	2	4	0	1	0	0	0	1	1	1	1	1	0	4	6	0	0	27	25	0	0	2	3	0
O86335	5	7	7	6	8	3	10	9	3	5	5	5	11	10	14	2	4	0	0	3	11	2	9	8	4	3	3	2	2	6	6	13	3	7	3	2	2	2	4	2	2	2	27	36	3	2	4	4	0
O86336	4	16	7	9	8	0	11	8	4	9	7	13	13	7	5	0	9	1	1	2	7	3	9	8	15	5	10	1	5	6	5	15	5	8	6	13	9	1	11	13	1	1	8	9	4	3	8	8	0
O86337	0	0	0	0	0	0	0	0	0	0	0	0	0	0	0	0	0	0	0	0	0	0	0	0	0	0	0	0	0	0	0	0	0	0	0	0	0	0	0	0	0	0	0	0	0	0	0	0	0
O86338	0	0	0	0	0	0	0	0	0	0	0	0	0	0	0	0	0	0	0	0	0	0	0	0	0	0	0	0	0	0	0	0	0	0	0	0	0	0	0	0	0	0	0	0	0	0	0	0	0
O86339	0	0	0	0	0	0	0	0	0	0	0	0	0	0	0	0	0	0	0	0	2	0	0	0	0	2	2	2	1	1	1	3	1	1	2	2	1	2	0	0	0	0	2	3	1	1	2	2	1
O86340	0	0	0	0	0	0	0	0	0	0	0	0	0	0	0	0	0	0	0	0	0	0	0	0	0	0	0	0	0	0	0	0	0	0	0	0	1	0	0	0	0	0	1	1	0	0	0	0	0
O86342	0	0	0	0	0	0	0	0	0	0	0	0	1	0	0	0	0	0	0	0	30	3	12	45	14	7	5	6	5	17	16	29	2	21	7	17	7	0	14	13	0	0	12	11	5	3	25	27	0
O86345	0	0	0	0	0	0	0	0	0	0	0	0	0	0	0	0	0	0	0	0	8	4	8	8	5	4	3	9	6	9	7	25	2	3	5	7	8	0	4	6	2	2	9	13	3	5	7	6	1
O86346	3	7	5	4	7	0	6	6	3	6	4	7	8	2	2	0	5	0	0	2	0	0	10	5	10	4	5	1	1	4	4	6	1	4	3	6	1	1	7	6	0	0	2	2	3	2	12	10	0
O86347	3	15	9	4	9	0	11	6	2	7	2	18	6	11	9	1	13	1	2	5	11	1	4	10	4	4	8	2	4	10	10	4	1	6	5	2	0	0	4	4	0	1	7	9	1	0	9	7	0
O86348	16	106	27	13	20	4	47	36	12	25	15	51	22	19	20	3	39	1	1	6	26	3	17	16	17	4	11	2	5	12	10	26	2	19	6	3	4	1	16	20	2	3	22	27	2	2	23	21	0
O86349	3	0	0	0	0	0	3	7	2	0	0	0	1	0	0	0	0	0	0	0	3	1	3	4	5	7	3	1	1	3	4	3	2	2	3	6	2	1	5	5	0	0	5	4	0	2	7	4	0
O86350	1	10	3	1	1	0	1	2	0	2	0	3	3	0	3	0	4	0	0	0	10	0	5	5	6	5	10	0	0	4	4	7	2	2	8	4	0	2	9	9	5	5	10	10	7	3	2	5	0
O86351	0	0	2	1	6	0	0	2	1	3	2	9	4	0	0	0	5	0	0	0	0	0	0	0	0	0	0	0	0	0	0	0	0	0	0	0	0	0	0	1	0	0	0	0	0	0	0	0	0
O86352	5	30	8	5	3	0	11	14	7	4	4	9	7	8	7	0	5	0	0	3	4	2	4	2	7	6	9	7	10	9	8	13	3	2	2	7	2	0	6	5	0	1	4	4	2	1	19	18	0
O86353	0	12	9	9	4	0	20	0	1	5	4	8	3	2	3	0	9	0	0	2	8	0	4	3	10	4	5	0	2	0	0	5	0	3	3	0	1	0	6	6	1	2	6	9	1	0	4	6	0
O86358	0	0	0	0	0	0	0	0	0	0	0	0	0	0	0	0	0	0	0	0	0	0	0	0	1	0	0	0	0	0	0	1	0	0	0	0	0	0	0	0	0	0	0	0	0	0	0	0	0
O86359	1	5	2	1	2	0	5	1	1	2	2	3	2	3	1	1	2	4	3	2	5	0	1	1	0	0	0	0	1	0	0	0	0	1	0	0	0	0	1	0	0	0	2	0	0	0	0	1	0
O86361	5	6	7	6	7	0	11	9	6	6	6	16	11	1	1	1	19	0	0	2	1	1	6	9	3	2	6	1	0	3	3	6	0	7	4	1	3	0	4	4	0	0	0	0	0	0	8	8	0
O86362	0	0	0	0	0	0	0	0	0	0	0	0	0	0	0	0	0	0	0	0	0	0	0	0	0	0	0	0	0	0	0	0	0	0	0	0	0	0	0	0	0	0	0	0	0	0	0	0	0
O86364	0	0	0	0	0	0	0	0	0	0	0	0	0	0	0	0	0	0	0	0	0	0	0	0	0	0	0	0	0	0	0	0	0	0	0	0	0	0	0	0	0	0	0	0	0	0	0	0	0
O86365	0	0	0	0	0	0	0	0	0	0	1	0	2	0	0	0	0	0	0	0	0	0	0	0	1	0	0	0	0	0	0	0	0	0	0	0	0	0	0	0	0	0	0	0	0	0	0	0	0
O86367	20	28	25	26	20	1	42	20	13	19	7	46	18	8	9	0	55	0	0	3	9	1	6	5	25	7	4	1	7	5	2	16	2	8	3	0	1	0	8	5	2	2	7	10	1	0	9	8	0
O86368	12	9	21	23	16	0	27	15	12	13	11	27	20	4	4	0	15	0	0	1	3	1	18	21	5	4	12	0	0	5	4	9	0	22	3	1	3	0	8	9	0	0	2	1	0	0	8	9	0
O86369	9	26	16	16	14	0	21	18	12	15	8	34	17	6	6	1	23	0	0	2	4	0	13	14	6	3	10	2	1	8	8	6	1	9	4	0	1	1	6	5	0	0	2	2	1	0	8	8	0
O86370	0	0	0	0	0	0	0	0	0	0	0	0	0	0	0	0	0	0	0	0	1	0	1	0	0	0	0	0	0	1	1	2	0	0	1	0	0	0	1	1	0	0	0	0	0	0	0	0	0
O86371	0	0	0	0	0	0	0	0	0	0	0	0	0	0	0	0	0	0	0	0	0	0	0	0	0	0	0	0	0	0	0	0	0	0	0	0	0	0	0	0	0	0	0	0	0	0	0	0	0
O86372	0	2	0	0	0	0	0	0	0	0	0	0	0	0	0	0	0	0	0	0	0	1	3	0	3	1	1	0	0	1	2	1	0	0	0	2	1	0	1	1	0	0	2	1	0	1	1	0	0
O86374	2	6	6	4	10	1	6	10	4	6	3	9	6	3	3	2	8	1	1	4	5	3	2	3	3	3	2	3	2	3	2	3	1	3	2	3	1	1	3	3	1	0	4	4	3	3	4	5	0
P09621	1	5	1	1	2	1	2	2	2	1	1	4	1	2	3	2	3	1	2	1	2	1	1	1	1	2	1	1	1	1	1	1	1	1	1	1	1	1	1	1	1	1	1	2	1	1	1	1	1
P0A4V2	1	1	1	1	1	0	3	2	0	1	2	3	1	1	1	0	1	0	0	1	2	1	1	1	4	1	1	2	3	1	1	2	0	1	0	0	1	0	1	0	0	0	1	3	0	0	1	3	0
P0A4V4	1	1	1	1	1	0	3	2	0	1	2	3	1	1	1	0	1	0	0	1	2	0	1	1	4	1	1	2	2	1	1	2	0	1	0	0	0	0	0	1	0	0	1	3	0	0	1	3	0
P0A4V6	1	1	1	0	1	0	3	2	0	1	1	3	1	0	0	0	1	0	0	0	1	0	1	1	1	1	1	2	2	1	1	2	0	1	0	0	0	0	0	0	0	0	1	3	0	0	0	0	0
P0A4W0	11	15	35	15	16	0	34	17	9	13	1	26	13	1	1	0	26	0	0	21	1	0	2	20	14	2	3	1	1	4	4	2	2	0	0	1	2	0	0	1	0	0	0	0	0	0	28	18	0
P0A4W2	0	2	0	0	0	0	0	0	0	0	0	0	3	1	1	0	0	0	0	0	21	12	34	19	19	12	23	20	19	28	24	109	12	8	17	37	25	3	16	19	3	2	28	28	6	5	32	31	6
P0A4W4	20	48	78	39	32	6	45	50	14	24	19	53	51	7	8	5	67	6	5	10	28	21	19	13	9	10	20	18	16	27	26	80	10	6	16	31	28	11	8	14	4	4	42	38	6	10	28	33	6
P0A4W6	1	8	1	3	1	0	3	1	1	1	2	1	1	2	1	1	3	1	1	1	1	1	1	2	3	1	1	1	1	2	2	2	1	1	4	2	2	1	1	2	1	1	2	3	2	1	1	2	1
P0A4W8	0	0	0	0	0	0	0	0	0	0	0	0	0	0	0	1	0	0	0	1	1	1	1	0	1	0	1	0	0	0	0	1	1	0	1	1	1	0	1	1	1	1	0	0	1	1	1	1	0
P0A4X0	16	50	25	13	24	4	32	17	5	18	12	31	13	9	9	0	23	0	0	13	14	0	8	11	15	7	11	2	6	6	5	25	3	7	6	5	1	0	15	19	1	1	14	13	1	3	21	24	0
P0A4X2	0	0	0	0	0	0	0	0	0	0	0	0	0	0	0	0	0	0	0	0	1	0	1	2	1	1	1	1	1	3	3	2	2	1	1	3	2	1	1	1	0	0	1	1	1	1	2	2	0
P0A4X4	4	6	6	6	7	0	11	7	5	6	4	10	5	3	2	2	8	0	0	3	2	0	3	3	1	1	3	2	1	3	2	4	2	3	2	2	1	0	2	5	2	3	3	3	1	2	2	1	0
P0A4X6	5	9	6	7	11	0	6	7	2	5	3	10	5	4	4	1	8	0	0	4	4	0	8	8	9	7	6	4	3	7	6	12	3	5	5	6	2	0	3	3	2	2	5	7	3	4	8	5	0
P0A4X8	21	55	37	31	29	4	48	45	19	29	12	72	46	12	15	6	46	4	4	9	15	0	19	14	9	5	13	3	2	14	16	12	2	12	12	0	0	1	15	15	0	0	15	23	3	3	17	20	0
P0A4Y0	19	0	24	42	19	1	52	48	17	19	19	34	28	0	0	4	35	1	1	0	6	0	1	1	4	0	1	0	0	0	0	3	0	2	0	0	0	0	0	0	0	0	6	5	0	1	0	0	0
P0A4Y2	17	0	22	39	16	3	45	34	12	19	19	32	18	1	1	1	31	2	2	0	19	0	9	1	17	3	2	1	0	11	6	6	0	4	3	15	7	0	6	11	0	0	12	12	2	2	1	2	0
P0A4Y4	13	10	3	3	2	2	4	22	7	2	4	4	4	8	9	0	6	0	0	7	5	8	4	0	8	5	3	2	4	10	8	5	2	0	1	2	0	0	9	5	0	0	6	5	1	0	8	14	0
P0A4Y6	0	5	1	2	0	0	1	0	0	1	1	2	1	2	2	0	1	0	0	1	1	0	2	3	1	1	2	3	3	2	2	1	2	2	2	1	0	0	2	3	1	1	1	1	1	1	1	2	0
P0A4Y8	0	0	0	0	0	0	0	0	0	0	0	0	0	0	0	0	0	0	0	0	0	0	0	0	1	1	0	1	1	2	2	0	0	0	0	1	1	0	1	1	0	0	0	0	0	0	1	1	0
P0A4Z0	3	4	4	3	9	0	5	13	4	3	3	5	4	4	4	1	4	0	1	3	3	1	5	5	3	3	4	4	3	4	4	6	2	3	3	2	0	0	4	3	2	2	3	3	2	4	6	6	0
P0A4Z2	1	10	5	3	6	1	7	1	1	5	4	7	2	3	3	0	8	0	0	3	3	1	3	2	2	2	2	2	2	4	3	2	1	2	4	2	2	0	2	4	0	0	5	5	5	1	3	3	1
P0A4Z4	0	2	0	0	1	0	0	0	0	0	2	0	2	1	1	0	0	0	0	1	2	1	1	1	1	1	1	1	1	4	3	1	2	1	1	1	1	0	1	1	1	1	3	3	0	1	1	1	0
P0A4Z6	0	0	0	0	0	0	0	0	0	0	0	0	0	0	0	0	0	0	0	0	1	1	1	1	0	1	1	1	1	1	1	2	0	1	1	1	0	0	1	1	0	0	1	1	0	1	1	1	0
P0A4Z8	0	7	0	0	0	0	0	0	0	0	2	0	1	3	4	0	0	0	0	2	3	2	2	2	2	2	4	3	3	6	5	1	2	1	2	4	3	1	2	2	2	0	2	2	2	3	2	2	0
P0A500	1	4	4	3	2	0	1	1	1	2	2	2	1	5	0	1	2	1	1	1	4	2	2	2	2	2	3	2	2	2	2	2	2	2	2	2	3	2	2	2	1	1	3	3	4	2	1	2	0
P0A502	7	38	33	28	40	7	47	23	3	24	13	55	11	14	13	5	78	3	3	10	4	9	4	3	2	3	8	1	1	5	5	5	7	3	5	5	6	0	6	6	0	0	13	18	3	4	8	12	5
P0A504	12	51	56	39	59	11	69	41	11	36	18	86	17	15	14	8	120	6	7	16	4	8	4	3	2	3	8	1	1	5	5	5	7	3	5	5	6	0	6	6	0	0	14	18	3	4	8	12	5
P0A506	3	5	4	3	4	0	3	5	3	4	2	7	6	6	6	1	3	0	0	2	6	0	5	5	14	8	3	4	5	5	6	2	4	4	4	16	7	0	6	7	3	3	9	7	11	6	4	5	0
P0A508	5	10	10	7	15	1	20	9	4	7	6	17	18	5	4	2	12	1	1	7	4	3	9	9	7	5	6	4	5	6	5	9	3	12	4	6	6	2	11	11	2	2	3	3	9	7	8	8	0
P0A510	5	10	5	4	7	0	10	9	3	3	5	7	6	4	4	1	5	1	1	6	1	2	5	7	6	4	5	3	3	3	3	6	3	9	3	3	3	1	7	7	2	2	1	1	3	3	10	9	1
P0A512	99	284	92	80	72	0	178	88	60	60	8	170	89	11	8	0	193	0	0	3	11	0	0	0	1	2	0	0	0	0	0	4	0	2	0	0	0	0	0	0	0	0	6	4	0	0	3	5	0
P0A514	85	242	80	75	57	0	150	81	57	53	6	146	78	11	8	0	169	0	0	3	10	0	0	0	1	2	0	0	0	0	0	4	0	2	0	0	0	0	0	0	0	0	6	4	0	0	3	5	0
P0A516	85	228	75	59	53	0	142	78	54	52	6	138	70	11	8	0	156	0	0	2	10	0	0	0	1	2	0	0	0	0	0	4	0	2	0	0	0	0	0	0	0	0	6	4	0	0	3	5	0
P0A518	7	17	12	7	12	6	8	10	5	9	6	16	11	10	6	8	18	7	7	6	3	1	1	1	1	2	2	1	1	1	1	1	1	1	1	1	1	1	2	2	1	1	2	3	1	1	2	2	1
P0A520	2	12	1	3	5	1	1	5	2	2	3	7	6	3	5	3	9	3	3	1	3	1	1	1	1	2	2	1	1	1	1	1	1	1	1	1	1	1	2	2	1	1	2	3	1	1	2	2	1
P0A522	2	17	3	2	2	1	4	3	2	2	3	4	4	4	4	4	4	2	4	2	5	1	3	4	3	3	4	1	1	3	3	3	2	3	2	2	3	3	4	5	2	2	6	7	2	2	4	4	0
P0A524	0	4	0	0	0	0	0	0	0	0	0	0	0	1	1	0	0	0	0	0	2	0	0	0	2	2	0	0	0	0	0	0	1	0	0	1	1	0	1	3	0	0	2	2	1	0	2	1	0
P0A526	1	10	1	1	0	0	2	1	1	1	1	1	2	7	11	2	1	3	2	0	3	0	1	1	1	2	2	2	1	1	1	3	1	1	1	3	2	2	1	1	1	1	4	4	1	1	2	2	0
P0A528	11	47	17	15	23	9	25	27	14	15	13	27	11	19	19	10	20	7	12	11	12	2	5	5	6	6	5	4	3	6	5	7	3	6	6	4	6	5	9	10	5	5	10	11	5	4	5	4	2
P0A530	1	1	4	2	4	0	4	3	0	4	1	9	1	0	0	2	5	1	0	1	2	2	2	1	3	2	1	2	2	2	2	2	3	2	1	3	2	0	2	2	2	2	3	3	3	2	2	2	0
P0A532	0	0	0	0	0	0	0	0	0	0	1	0	0	2	2	0	0	0	0	0	5	0	3	0	0	1	0	1	0	1	1	2	3	3	4	2	2	0	1	1	0	1	4	4	1	1	1	2	0
P0A534	2	18	2	14	7	0	6	1	1	2	6	8	5	6	5	0	7	0	0	4	4	0	8	4	4	3	3	2	3	3	3	4	2	4	4	9	6	0	6	6	0	0	7	8	2	3	7	7	0
P0A536	0	0	0	0	0	0	0	0	0	0	0	0	0	0	0	0	0	0	0	0	0	0	0	0	0	0	0	0	0	0	0	0	0	0	0	0	0	0	0	0	0	0	0	0	0	0	0	0	0
P0A538	4	0	6	2	2	0	23	8	4	2	2	7	3	0	0	1	4	0	0	2	1	0	0	0	2	1	1	0	0	1	0	1	0	1	1	2	2	0	2	2	0	0	1	1	1	1	1	1	0
P0A540	0	2	1	1	1	0	3	2	1	1	0	4	2	1	1	1	2	0	0	0	1	1	1	1	2	2	1	1	1	2	1	1	1	1	1	2	2	0	2	1	0	0	0	0	2	1	1	1	1
P0A542	1	11	6	4	3	1	2	3	2	2	2	58	4	6	4	1	90	2	2	5	4	2	3	3	4	3	3	4	4	6	6	3	3	6	5	4	4	2	5	5	2	2	6	6	3	3	4	4	1
P0A544	5	12	6	2	12	0	17	12	5	4	3	11	11	5	6	0	12	0	0	6	2	0	7	4	3	2	6	2	3	6	6	15	2	4	3	7	2	0	3	3	0	0	3	3	2	2	8	6	0
P0A546	1	3	1	1	2	1	3	2	1	2	1	1	3	1	1	1	1	1	1	1	1	1	1	1	0	0	0	1	1	1	1	2	1	1	1	0	0	2	0	1	0	0	0	1	0	0	1	1	1
P0A548	32	111	58	29	45	21	77	45	27	42	32	88	40	42	37	21	72	17	17	17	10	1	2	2	3	2	3	2	2	3	3	6	1	3	2	3	2	1	8	5	1	1	13	13	2	4	4	4	1
P0A550	2	11	4	2	5	1	11	3	1	3	3	8	4	5	5	5	8	4	3	2	1	1	1	1	2	2	1	1	1	2	2	1	1	1	1	2	1	1	2	2	1	1	1	1	2	1	3	3	1
P0A552	1	1	31	1	9	2	2	2	1	3	1	8	2	1	1	1	4	1	1	1	1	1	1	1	1	2	1	2	2	2	2	1	0	1	1	1	0	1	1	1	1	1	0	0	2	0	2	2	1
P0A554	4	13	9	5	4	0	6	11	2	5	3	7	7	4	4	5	5	2	2	3	4	3	3	6	4	5	7	3	5	5	5	7	3	3	5	4	3	3	4	6	2	2	5	5	2	3	16	14	2
P0A556	14	28	30	20	20	5	33	24	11	15	12	32	17	18	17	18	29	12	14	12	8	6	6	7	8	6	8	8	8	8	7	8	6	6	8	10	8	5	10	11	5	6	7	7	6	7	8	9	4
P0A558	15	31	37	23	21	4	39	27	13	19	13	39	21	20	17	14	33	12	12	13	7	5	7	7	7	6	7	8	8	8	8	8	6	6	8	10	8	5	10	10	5	5	6	6	5	7	6	7	4
P0A560	0	0	0	0	0	0	0	0	0	0	0	0	0	0	0	0	0	0	0	0	0	0	0	0	0	0	0	0	0	0	0	0	0	0	0	0	0	0	0	0	0	0	0	0	0	0	0	0	0
P0A562	14	44	14	16	21	4	43	17	7	10	13	18	17	27	18	14	22	14	13	7	17	10	11	9	12	8	10	10	10	12	12	11	9	11	11	13	14	10	12	14	9	8	16	16	11	10	10	8	7
P0A564	0	0	0	0	0	0	0	0	0	0	0	0	0	0	0	0	0	0	0	0	0	0	0	0	0	1	0	0	0	0	0	0	0	0	0	0	0	0	0	0	0	0	0	0	0	0	1	0	0
P0A566	0	0	0	0	0	0	0	0	0	0	0	0	0	0	0	0	0	0	0	0	0	0	0	0	0	0	0	0	0	0	0	0	0	0	0	0	0	0	0	0	0	0	0	0	0	0	0	0	0
P0A568	0	0	0	0	0	0	0	0	0	0	0	0	0	0	0	0	0	0	0	0	0	0	0	0	0	0	0	0	0	0	0	0	0	0	0	0	0	0	0	0	0	0	0	0	0	0	0	0	0
P0A570	0	0	0	0	0	0	0	0	0	0	0	0	0	0	0	0	0	0	0	0	0	0	0	0	0	0	0	0	0	0	0	0	0	0	0	0	0	0	0	0	0	0	0	0	0	0	0	0	0
P0A572	17	109	26	13	21	4	50	36	12	23	15	55	21	19	20	3	42	1	1	6	28	3	19	16	19	4	13	2	5	14	14	27	2	23	12	4	4	1	17	22	2	3	22	27	2	3	24	24	0
P0A574	2	27	6	4	4	0	7	5	3	3	1	10	3	1	2	0	10	0	0	1	3	3	7	3	2	2	3	1	1	3	3	4	1	1	1	2	2	2	3	3	1	1	1	2	1	1	6	5	0
P0A576	1	2	2	0	2	0	2	1	1	1	0	2	2	1	1	1	2	0	0	1	2	0	1	1	1	1	1	1	1	1	1	1	0	1	1	0	0	0	1	1	1	1	2	2	1	1	1	1	0
P0A578	0	3	0	0	0	0	0	0	0	0	0	0	0	1	1	1	0	0	0	1	1	0	1	2	1	2	1	2	1	1	2	1	1	1	1	1	0	0	1	1	1	1	1	1	1	1	1	1	1
P0A580	0	5	0	0	0	0	0	0	0	0	0	0	1	1	1	0	0	0	0	1	1	0	1	1	0	1	1	1	1	1	1	1	1	1	2	1	0	0	0	0	1	1	1	1	0	1	1	1	0
P0A582	0	0	0	0	0	0	0	0	0	0	0	0	0	0	0	0	0	0	0	0	15	2	2	3	2	3	2	1	1	2	2	3	1	2	4	3	3	0	2	2	0	0	3	3	2	4	2	2	0
P0A584	0	6	2	1	2	0	4	3	1	2	2	9	5	1	1	1	3	1	1	1	2	1	1	0	1	1	2	1	1	0	0	2	0	0	0	1	0	0	1	2	0	0	1	2	1	0	2	2	0
P0A586	0	6	2	1	2	0	4	3	1	2	2	9	5	1	1	1	3	1	1	1	2	1	1	0	1	1	2	1	1	0	0	2	0	0	0	1	0	0	1	2	0	0	1	2	1	0	2	2	0
P0A588	2	10	4	7	5	1	6	8	3	3	2	8	6	4	3	2	4	1	1	7	4	2	5	2	7	3	3	6	4	5	3	4	2	3	5	5	2	1	6	3	2	1	3	3	3	5	6	5	0
P0A590	2	9	4	6	4	1	6	2	2	2	1	4	2	1	1	1	2	0	0	1	2	0	1	2	2	4	4	1	1	2	2	6	2	1	1	3	1	0	1	1	2	2	1	1	1	1	4	2	0
P0A592	0	2	0	0	0	0	0	0	0	0	0	0	0	0	0	0	0	0	0	0	1	0	2	0	0	1	2	0	0	0	0	2	0	1	1	0	0	0	1	0	0	0	0	0	0	1	1	1	0
P0A595	0	2	0	0	0	0	0	0	0	0	0	0	0	0	0	0	0	0	0	0	1	0	2	0	0	1	2	0	0	0	0	1	0	0	1	0	0	0	1	0	0	0	0	0	0	1	1	1	0
P0A597	9	8	8	4	8	3	20	6	7	8	5	11	8	5	4	1	11	1	1	2	17	0	5	7	12	10	10	6	2	5	7	8	15	3	8	6	4	2	16	15	0	0	40	35	2	3	10	9	0
P0A599	14	12	28	12	19	5	40	14	10	24	14	40	16	6	6	1	35	0	0	2	22	0	6	8	14	11	13	9	4	6	7	14	15	5	9	7	4	3	17	14	0	0	47	43	3	3	11	12	0
P0A5A1	2	14	3	4	3	1	5	4	2	3	4	8	6	4	4	2	4	1	2	5	4	1	4	5	3	5	3	4	4	5	5	4	5	5	5	8	1	0	3	4	2	2	6	5	3	4	6	4	0
P0A5A3	0	1	8	0	4	1	2	0	0	3	2	6	4	2	2	2	5	0	0	2	2	3	7	4	2	4	4	4	3	3	4	4	3	4	4	4	6	2	8	6	2	2	3	2	1	4	4	4	3
P0A5A5	0	5	2	0	0	0	1	1	2	1	0	2	1	2	4	0	2	0	0	0	5	3	3	3	3	3	3	4	4	3	3	4	2	3	3	3	3	3	3	3	3	4	4	4	3	2	6	5	1
P0A5A7	10	40	15	9	13	0	17	14	9	11	10	36	17	15	15	4	22	0	0	3	10	1	9	7	13	5	5	0	2	5	3	7	1	3	3	2	1	0	5	7	0	0	13	12	2	2	8	12	0
P0A5A9	2	5	3	3	2	0	3	2	2	2	2	3	3	2	2	3	7	2	2	2	2	0	2	3	2	2	1	3	3	3	3	2	0	3	3	0	0	0	2	2	1	2	3	4	1	0	1	1	0
P0A5B1	0	1	0	0	0	0	0	0	0	0	1	0	1	1	1	0	0	0	0	1	1	0	1	1	0	0	1	1	1	1	1	1	0	1	1	1	0	0	0	0	0	0	1	1	1	1	1	1	0
P0A5B3	0	1	0	0	0	0	0	0	0	0	1	0	0	1	1	0	0	0	0	1	2	0	1	1	1	1	1	1	1	1	1	1	1	1	1	1	0	0	0	0	0	0	1	2	1	1	1	1	0
P0A5B5	4	7	8	3	3	1	8	5	3	5	3	13	5	2	2	2	15	2	2	2	2	1	2	2	3	2	0	1	1	1	1	2	1	3	1	1	1	2	4	6	1	1	2	2	2	2	3	2	1
P0A5B7	8	29	6	13	5	0	7	4	5	3	3	7	3	3	4	2	7	1	1	2	4	1	2	0	1	3	3	0	0	1	1	4	0	1	1	0	0	1	3	4	0	0	2	3	1	1	1	4	1
P0A5B9	7	23	21	12	15	5	29	16	9	14	10	30	11	7	8	5	34	5	5	14	4	1	5	3	2	2	1	3	2	4	5	1	2	2	2	4	4	1	13	10	3	3	5	6	2	1	3	1	1
P0A5C1	4	0	0	4	0	0	1	0	1	0	2	0	0	0	1	0	0	0	0	0	11	1	6	2	8	7	2	0	0	1	1	4	4	1	0	4	3	0	2	2	0	0	9	9	0	1	9	10	0
P0A5C3	0	0	0	0	0	0	0	0	0	0	0	0	0	0	0	0	0	0	0	0	0	0	0	0	0	0	0	0	0	0	0	0	0	0	0	0	0	0	2	2	0	0	0	0	0	0	2	3	0
P0A5C5	0	0	0	0	0	0	0	0	0	0	0	0	0	0	0	0	0	0	0	0	0	0	0	0	0	0	0	0	0	0	0	0	0	0	0	0	0	0	0	0	0	0	0	0	0	0	0	0	0
P0A5C7	0	0	0	0	0	0	0	0	0	0	0	0	0	0	0	0	0	0	0	0	0	0	0	0	0	0	0	0	0	0	0	0	0	0	0	0	0	0	0	0	0	0	0	0	0	0	0	0	0
P0A5C9	0	0	0	0	0	0	0	0	0	0	0	0	0	0	0	0	0	0	0	0	0	0	0	0	0	0	0	0	0	0	0	0	0	0	0	0	0	0	0	0	0	0	0	0	0	0	0	0	0
P0A5D1	16	82	16	15	20	3	46	17	11	15	19	35	24	23	19	2	20	0	0	8	29	4	9	8	20	11	16	5	5	19	15	21	10	8	11	4	2	2	22	26	1	1	22	25	5	6	26	21	0
P0A5D3	0	1	1	0	1	0	1	0	0	1	0	2	1	1	1	0	1	0	0	0	3	0	1	0	0	1	0	0	0	2	1	0	0	0	0	0	0	0	0	1	0	0	2	2	0	0	0	0	0
P0A5D5	0	0	0	0	0	0	0	0	0	0	0	0	0	0	0	0	0	0	0	0	0	0	0	0	0	0	0	0	0	0	0	0	0	1	0	0	0	0	0	0	0	0	0	0	0	0	0	0	0
P0A5D7	0	0	1	2	0	0	0	0	0	2	0	4	0	0	0	0	3	0	0	0	0	0	0	0	1	1	0	0	0	0	0	0	0	0	0	0	0	0	0	0	0	0	0	0	0	0	0	1	0
P0A5D9	0	0	0	0	0	0	0	0	0	0	0	0	0	0	0	0	0	0	0	0	0	0	0	0	0	0	0	0	0	0	0	0	0	0	0	0	0	0	1	0	0	0	0	0	0	0	9	7	0
P0A5E1	0	0	0	0	0	0	0	0	0	0	0	0	0	0	0	0	0	0	0	0	2	0	0	0	0	0	0	0	0	0	0	0	0	0	0	0	0	0	0	0	0	0	0	0	0	0	0	0	0
P0A5E3	0	0	0	0	0	0	0	0	0	0	0	0	0	0	0	0	0	0	0	0	0	0	0	0	0	0	0	0	0	0	0	0	0	0	0	0	0	0	0	0	0	0	1	0	0	0	0	1	0
P0A5E5	0	0	0	0	0	0	0	0	0	0	0	0	0	0	0	0	0	0	0	0	0	0	0	0	0	0	0	0	0	0	0	0	0	0	0	0	0	0	0	0	0	0	0	0	0	0	0	0	0
P0A5E7	0	0	0	0	0	0	0	0	0	0	0	0	0	0	0	0	0	0	0	0	0	0	0	0	0	1	0	0	0	0	0	1	0	0	0	0	0	0	0	0	0	0	0	0	0	1	2	2	0
P0A5E9	0	0	0	0	0	0	0	0	0	0	0	0	0	0	0	0	0	0	0	0	0	0	0	0	0	0	0	0	0	0	0	0	0	0	0	0	0	0	0	0	0	0	0	0	0	0	0	0	0
P0A5F1	0	0	0	0	0	0	0	0	0	0	0	0	0	0	0	0	0	0	0	0	0	0	0	0	0	0	0	0	0	0	0	0	0	0	0	0	0	0	0	0	0	0	0	0	0	0	0	0	0
P0A5F3	0	0	0	0	0	0	0	0	0	0	0	0	0	0	0	0	0	0	0	0	0	0	0	0	0	0	0	0	0	0	0	0	0	0	0	0	0	0	0	0	0	0	0	0	0	0	0	0	0
P0A5F5	6	22	13	8	12	2	17	8	4	10	4	12	11	4	1	0	15	0	0	2	12	0	2	7	19	7	2	1	3	4	3	13	4	2	3	1	1	0	5	4	1	1	3	6	0	0	6	5	0
P0A5F7	0	19	0	0	0	0	0	0	0	0	3	0	18	2	3	0	0	0	0	0	11	0	4	4	2	2	0	1	2	3	3	2	1	3	7	1	0	0	8	11	0	0	11	9	2	0	7	13	0
P0A5F9	2	8	9	3	10	0	15	6	2	7	5	11	5	2	2	0	14	0	0	2	4	0	4	2	3	1	5	1	2	3	3	4	0	3	4	1	1	0	2	4	0	0	5	5	4	1	2	2	0
P0A5G1	21	82	42	25	25	6	54	28	22	28	28	67	49	44	41	8	46	6	8	12	68	1	21	13	26	5	23	13	6	19	17	27	7	18	25	17	15	3	31	33	7	4	35	36	11	8	13	22	0
P0A5G3	1	1	1	0	1	0	1	1	1	2	1	8	0	0	0	0	5	0	0	1	1	0	1	1	0	0	0	1	1	1	0	2	1	1	0	0	0	0	0	0	0	0	1	1	1	0	1	0	0
P0A5G5	1	0	2	0	7	0	3	0	0	3	0	4	2	0	0	0	4	0	0	0	3	0	2	1	4	2	0	1	1	1	1	3	1	3	2	1	1	0	3	2	0	0	2	2	2	4	4	4	0
P0A5G7	0	3	1	2	1	0	4	0	0	1	1	3	1	1	1	0	1	0	0	1	1	0	1	3	1	1	1	0	0	2	2	3	1	2	0	1	2	0	1	1	0	0	1	1	0	0	1	1	0
P0A5G9	0	0	0	0	0	0	0	0	0	0	0	0	0	0	0	0	0	0	0	0	0	0	0	0	0	0	0	0	0	0	0	0	0	0	0	0	0	0	0	0	0	0	0	0	0	0	0	0	0
P0A5H1	0	0	0	0	0	0	0	0	0	0	0	0	0	1	1	0	0	0	0	0	25	0	5	5	2	2	3	4	4	8	8	4	4	5	4	10	6	3	8	7	2	1	11	10	5	4	7	5	0
P0A5H3	0	9	0	2	0	0	0	0	0	0	1	0	2	1	0	0	0	0	0	2	0	0	2	2	2	1	3	0	0	2	2	1	0	2	2	0	0	0	3	2	0	0	1	1	0	1	5	4	0
P0A5H5	0	1	0	0	0	0	0	0	0	0	0	0	0	0	1	0	0	0	1	0	1	1	2	1	1	1	1	1	1	1	1	1	1	1	1	1	1	1	2	2	1	1	1	1	1	1	1	1	1
P0A5H8	5	22	5	2	4	2	5	8	3	4	4	6	4	4	4	2	9	2	2	3	4	1	2	2	2	2	2	2	2	2	2	2	2	2	2	1	1	1	2	2	2	2	2	2	2	2	3	2	0
P0A5I0	0	1	0	0	0	0	0	0	0	0	0	0	0	1	1	2	0	1	1	0	1	0	1	1	1	1	1	1	1	1	1	1	1	1	1	1	1	0	1	1	1	1	1	1	1	1	0	1	0
P0A5I2	0	1	0	0	0	0	0	0	0	0	0	0	0	1	1	2	0	1	1	0	1	0	1	1	1	1	1	1	1	1	1	1	1	1	1	1	1	0	1	1	1	1	1	1	1	1	0	1	0
P0A5I4	6	5	25	8	23	1	61	21	5	18	9	55	10	1	1	1	46	1	1	1	1	1	1	1	1	1	2	1	1	1	1	2	1	1	1	1	1	0	1	1	1	2	1	1	1	1	1	1	1
P0A5I8	0	0	0	0	0	0	0	0	0	0	0	0	0	0	0	0	0	0	0	0	0	0	0	0	0	0	0	0	0	0	0	0	0	0	0	0	0	0	0	0	0	0	0	0	0	0	0	0	0
P0A5J0	0	0	0	0	0	0	0	0	0	0	0	0	0	0	0	0	0	0	0	0	0	0	0	0	0	0	0	0	0	0	0	0	0	0	0	0	0	0	0	0	0	0	0	0	0	0	0	0	0
P0A5J2	6	14	7	4	7	3	15	9	5	6	6	11	7	6	6	4	10	5	5	3	3	2	2	3	4	2	1	2	2	1	1	7	2	2	2	4	2	2	5	4	1	1	4	4	2	2	5	4	1
P0A5J4	1	1	0	2	0	0	1	0	0	0	0	0	2	0	0	0	0	0	0	2	0	0	1	1	1	0	1	0	0	1	1	1	0	1	1	0	0	0	2	2	0	0	0	0	0	0	2	2	0
P0A5J6	3	16	15	5	7	2	12	9	4	9	4	17	4	5	4	4	24	1	1	3	2	1	1	1	2	1	1	1	1	1	1	1	1	1	1	0	0	0	2	2	1	1	1	1	2	1	1	1	0
P0A5J8	0	0	0	0	0	0	1	0	0	0	2	0	2	1	1	0	0	0	0	1	0	0	1	1	3	0	1	1	1	0	0	0	1	1	1	0	0	0	2	3	0	0	0	1	0	1	1	1	0
P0A5K0	0	0	0	0	0	0	0	0	0	0	0	0	0	0	0	0	0	0	0	0	0	0	0	0	0	0	0	0	0	0	0	0	0	0	0	0	0	0	0	0	0	0	0	0	0	0	0	0	0
P0A5K2	0	0	0	0	0	0	0	0	0	0	0	0	0	0	0	0	0	0	0	0	0	0	0	0	0	0	0	0	0	0	0	0	0	0	0	0	0	0	0	0	0	0	0	0	0	0	0	0	0
P0A5K4	1	1	1	1	2	0	0	4	0	1	0	1	1	1	1	0	1	0	0	0	1	0	1	1	1	1	1	1	1	1	1	1	0	1	1	1	1	0	1	1	0	0	1	1	1	1	1	1	0
P0A5K6	1	1	1	1	2	0	0	4	0	1	0	1	1	1	1	0	1	0	0	0	1	0	1	1	1	1	1	1	1	1	1	1	0	1	1	1	1	0	1	1	0	0	1	1	1	1	1	1	0
P0A5K8	0	0	0	0	0	0	0	0	0	0	0	0	0	0	0	0	0	0	0	0	0	1	1	1	1	1	1	1	1	1	1	1	1	0	0	0	1	0	2	1	0	0	0	0	0	0	1	2	1
P0A5L0	2	6	1	1	1	0	2	1	1	1	1	2	2	5	7	0	3	0	0	1	2	1	1	1	3	1	1	1	0	2	2	1	1	2	2	1	1	0	1	2	0	0	2	2	0	1	1	1	0
P0A5L2	0	3	0	0	0	0	0	0	0	0	1	0	2	1	1	0	0	0	0	1	2	1	2	2	2	4	2	2	2	2	2	2	2	2	2	4	4	1	2	2	2	1	2	2	2	2	3	3	0
P0A5L4	0	5	3	0	0	0	0	0	0	0	0	0	3	2	3	0	0	0	0	0	5	1	7	6	6	5	4	6	6	6	6	4	5	6	6	9	9	4	5	5	5	1	7	7	5	4	6	6	0
P0A5L6	4	6	4	2	4	0	4	4	3	4	1	9	5	1	2	1	5	0	0	4	4	1	4	2	2	2	3	0	1	2	3	3	3	3	3	5	4	0	3	4	2	2	3	3	3	3	5	5	1
P0A5L8	0	0	1	0	4	0	8	0	0	2	1	3	0	0	0	0	4	0	0	0	0	0	0	0	0	0	0	0	0	0	0	0	0	0	0	0	0	0	0	0	0	0	0	0	0	0	0	0	0
P0A5M0	3	11	5	2	4	0	3	5	0	3	0	6	4	0	3	1	6	0	0	0	10	0	6	5	6	5	11	0	0	4	4	7	3	2	8	4	0	3	9	9	6	6	10	10	7	3	2	5	0
P0A5M2	0	0	0	0	0	0	0	0	0	0	0	0	0	1	1	0	0	0	0	0	1	1	1	1	1	1	1	1	1	1	1	1	1	1	1	1	1	1	1	1	1	1	1	1	1	1	1	1	1
P0A5M4	5	4	7	3	6	0	6	2	1	3	4	12	6	2	2	1	18	0	0	1	2	1	3	1	1	1	2	1	1	3	3	4	3	2	3	2	0	0	2	2	0	0	2	2	2	3	1	1	0
P0A5M6	0	0	0	0	0	0	0	0	0	0	0	0	0	0	0	1	0	1	1	0	0	0	1	0	0	0	0	0	0	0	0	0	1	0	0	1	1	0	0	0	0	0	1	1	0	0	1	1	0
P0A5M8	1	2	2	1	1	0	4	1	1	2	1	4	3	2	1	1	2	1	1	2	2	0	3	2	4	2	2	1	1	4	3	2	2	2	2	2	1	0	2	2	2	1	2	2	2	2	2	2	0
P0A5N0	0	0	0	0	0	0	0	0	0	0	0	0	0	0	0	0	0	0	0	0	0	0	0	1	0	0	0	0	0	0	0	0	0	0	0	0	0	0	0	0	0	0	0	0	0	0	0	0	0
P0A5N2	1	1	6	1	12	0	10	1	0	9	1	20	2	0	1	0	21	0	0	0	0	0	0	1	0	1	0	1	0	0	0	0	0	0	0	1	1	1	1	1	0	0	0	0	1	0	1	1	0
P0A5N4	0	0	0	0	0	0	0	0	0	0	0	0	1	0	0	0	0	0	0	0	0	0	0	0	1	1	0	0	0	1	0	1	0	0	0	0	0	0	2	1	0	0	1	1	0	0	0	0	0
P0A5N6	2	8	0	0	1	0	3	0	0	1	1	1	1	1	2	1	1	0	0	0	10	1	7	2	7	1	2	2	2	7	7	10	0	2	2	5	4	0	5	8	0	0	7	6	0	0	5	5	0
P0A5N8	0	4	0	0	0	0	0	0	0	0	0	0	0	0	0	0	0	0	0	0	2	0	0	1	4	0	0	0	0	4	3	3	0	0	0	0	0	0	1	1	0	0	0	0	0	0	6	5	0
P0A5P0	9	36	9	10	11	0	11	11	9	10	14	20	15	23	23	3	13	3	1	7	32	2	10	8	16	3	12	4	3	6	4	15	2	10	17	9	8	1	17	19	5	3	20	23	5	4	6	15	0
P0A5P2	0	0	0	0	0	0	0	0	0	0	0	0	0	0	0	0	0	0	0	0	0	0	0	0	0	0	0	0	0	0	0	0	0	0	0	0	0	0	0	0	0	0	0	0	0	0	0	0	0
P0A5P4	2	0	2	2	0	0	2	1	0	1	2	7	5	0	0	0	6	0	2	0	0	0	0	0	0	0	0	0	0	0	0	0	0	0	0	0	0	0	0	0	0	0	0	0	0	0	0	0	0
P0A5P6	0	0	0	0	0	0	0	0	0	0	0	0	0	0	0	0	0	0	0	0	0	0	0	0	0	0	0	0	0	0	0	0	0	0	0	0	0	0	0	0	0	0	0	0	0	0	0	0	0
P0A5P8	0	0	0	0	0	0	0	0	0	0	0	0	0	0	0	0	0	0	0	0	0	0	0	0	0	0	0	0	0	0	0	0	0	0	0	0	0	0	0	0	0	0	0	0	0	0	0	0	0
P0A5Q2	0	0	0	0	0	0	0	0	0	0	0	0	0	0	0	0	0	0	0	0	0	0	0	0	0	0	0	0	0	0	0	0	0	0	0	0	0	0	0	0	0	0	0	0	0	0	0	0	0
P0A5Q4	0	0	0	0	0	0	0	0	0	0	0	0	0	0	0	0	0	0	0	0	1	0	0	2	0	0	0	1	1	0	0	0	0	1	0	0	2	0	0	0	0	0	0	0	0	0	0	0	0
P0A5Q6	0	0	0	0	0	0	0	0	0	0	0	0	0	0	0	0	0	0	0	0	0	0	0	0	0	0	0	0	0	0	0	0	0	0	0	0	0	0	0	0	0	0	0	0	0	0	0	0	0
P0A5Q8	0	2	0	0	0	0	0	0	0	0	1	0	1	1	1	0	0	0	0	1	1	0	1	1	1	1	1	0	0	1	1	1	1	1	1	1	0	0	1	1	1	0	1	1	1	1	1	1	0
P0A5R0	0	1	0	0	0	0	0	0	0	0	1	0	0	1	2	0	0	0	0	1	1	0	1	1	1	1	1	0	0	1	1	1	1	1	1	0	0	0	1	1	1	0	1	1	1	1	1	1	0
P0A5R2	0	2	0	0	0	0	0	0	0	0	0	0	1	0	0	0	0	0	0	0	7	0	4	2	3	1	2	0	0	1	2	7	1	2	1	5	3	1	4	2	1	0	6	5	2	1	3	2	0
P0A5R4	1	4	2	5	2	0	3	1	1	2	0	2	1	0	0	0	2	0	0	0	0	0	0	0	0	0	1	0	0	0	0	0	0	0	0	0	1	0	0	0	0	0	1	1	0	0	1	1	0
P0A5R6	6	24	21	9	12	4	25	15	7	12	8	32	3	11	11	1	24	1	1	12	4	1	4	4	1	4	5	3	2	3	1	3	1	5	2	3	3	0	1	2	0	0	6	4	3	2	9	9	0
P0A5R8	0	6	0	0	0	0	0	0	0	0	0	0	0	0	0	0	0	0	0	0	0	0	2	2	10	1	3	0	0	0	0	0	0	0	0	0	0	0	1	0	0	0	1	0	0	0	1	1	0
P0A5S0	0	1	0	0	0	0	0	0	0	0	0	0	0	1	1	0	0	0	0	0	5	1	2	2	1	2	3	1	2	2	2	1	0	2	2	2	2	1	2	2	0	0	2	2	1	2	2	2	0
P0A5S2	1	2	1	1	3	0	1	1	0	2	1	2	3	1	1	0	2	0	0	1	1	0	1	0	1	1	1	0	0	1	1	1	0	1	1	1	0	0	1	1	0	0	1	1	1	0	1	1	0
P0A5S4	157	1049	516	359	516	48	1426	382	144	427	292	1083	232	86	86	36	866	32	31	101	56	0	5	0	31	5	1	0	0	0	0	1	6	1	0	1	2	6	18	21	0	0	48	54	1	0	7	10	0
P0A5S6	2	4	2	3	3	1	6	10	3	2	2	6	2	4	2	0	5	1	1	3	2	0	1	1	1	1	1	1	1	1	1	1	1	1	1	1	1	0	1	1	1	1	2	2	1	1	2	1	0
P0A5S8	9	12	15	16	11	6	11	8	5	7	5	15	10	7	7	2	11	3	3	7	6	1	3	2	4	1	1	2	1	3	3	1	2	2	2	5	3	2	9	6	3	3	6	6	2	2	2	1	0
P0A5T0	0	7	6	1	5	0	5	0	0	2	1	2	1	1	1	1	3	0	0	0	1	2	3	2	3	2	2	4	4	3	3	3	3	3	2	4	4	0	4	4	0	0	3	2	2	2	3	3	0
P0A5T2	2	9	5	1	3	1	3	3	1	4	3	5	2	11	11	3	4	1	1	4	2	2	5	5	1	2	3	5	4	6	6	3	2	3	3	2	3	1	7	7	2	2	2	2	1	3	2	2	1
P0A5T4	1	1	7	1	1	0	2	4	1	1	1	4	1	1	1	0	2	0	0	1	1	0	1	1	1	1	1	1	1	1	1	2	1	1	1	1	1	0	1	1	1	1	1	1	1	1	1	1	0
P0A5T6	3	4	5	2	9	0	4	4	2	4	1	6	5	2	1	0	5	0	0	2	2	1	4	3	2	3	3	2	3	4	3	5	2	3	3	2	2	1	3	3	2	3	3	3	3	3	5	5	0
P0A5T8	4	2	5	3	3	0	5	4	2	4	2	7	2	2	2	0	7	0	0	2	7	0	3	3	5	3	4	5	5	5	5	2	4	4	5	4	4	1	5	5	3	4	3	3	5	5	3	3	0
P0A5U0	2	7	2	3	1	0	4	2	2	2	2	4	3	2	1	1	2	1	1	3	3	2	3	2	2	2	3	3	3	3	3	2	1	2	1	3	3	0	3	2	2	1	3	3	1	2	1	2	0
P0A5U2	2	10	2	1	3	1	3	3	3	2	1	5	3	1	1	1	9	1	1	2	1	1	2	1	3	3	4	1	1	2	2	3	1	1	2	3	0	0	2	2	1	1	1	1	1	1	5	2	1
P0A5U4	0	7	2	2	3	2	3	1	1	2	0	5	1	3	4	2	4	2	2	4	7	1	2	1	2	1	1	2	2	1	1	1	1	1	3	1	1	1	3	3	1	2	3	1	3	1	1	2	0
P0A5U6	26	15	80	22	96	7	115	43	8	75	29	170	15	10	14	6	145	7	5	9	3	1	4	3	2	4	3	2	4	4	5	4	1	4	3	4	3	1	5	3	0	0	6	6	3	2	4	3	0
P0A5U8	0	1	0	0	0	0	0	0	0	0	0	0	0	1	1	0	0	0	0	0	0	0	1	1	1	1	1	1	1	1	1	1	0	1	1	1	1	1	0	0	0	0	0	0	0	0	1	1	0
P0A5V0	0	3	0	0	0	0	0	0	0	0	1	0	0	2	1	0	0	0	0	2	1	1	1	3	2	1	2	1	3	3	3	2	1	1	1	1	0	0	3	2	2	2	1	1	1	3	0	2	0
P0A5V2	1	8	2	1	1	0	1	2	1	1	1	1	1	2	0	1	1	0	0	1	1	1	1	1	1	1	1	1	1	1	1	1	1	1	1	1	1	1	1	1	1	1	1	1	1	1	1	1	1
P0A5V4	1	4	2	1	2	0	1	1	0	1	1	2	2	2	2	2	1	2	2	1	1	1	1	1	1	1	1	1	1	1	1	1	1	1	1	1	1	1	1	1	1	1	1	1	1	1	1	1	1
P0A5V6	0	3	0	0	0	0	0	0	0	0	1	0	1	2	1	1	0	1	1	1	1	1	1	1	1	1	1	1	1	1	1	1	1	1	1	1	1	1	0	1	1	1	1	1	1	1	1	1	1
P0A5V8	0	0	0	0	0	0	0	0	0	0	0	0	0	0	0	0	0	0	0	0	0	0	0	0	0	0	0	0	0	0	0	0	0	0	0	0	0	0	0	0	0	0	0	0	0	0	0	0	0
P0A5W0	0	2	1	0	0	0	0	0	0	1	0	1	1	2	1	0	1	1	1	0	0	2	1	1	0	1	1	1	1	1	1	1	0	1	1	1	1	1	1	1	1	1	1	1	1	1	1	1	1
P0A5W2	0	1	0	0	0	0	0	0	0	0	0	0	1	2	1	0	0	1	1	0	1	2	1	1	1	1	1	1	1	1	1	1	1	1	1	1	1	1	1	1	1	1	1	1	1	1	1	1	1
P0A5W4	0	1	1	0	1	0	2	0	0	1	1	1	0	1	0	0	1	0	0	0	0	0	0	1	0	1	0	1	1	0	0	0	0	1	1	0	0	0	0	0	0	0	0	0	0	1	1	1	0
P0A5W6	0	1	2	0	1	0	1	0	0	1	0	0	0	1	2	0	1	0	0	1	0	0	0	1	1	1	0	1	1	0	1	0	0	0	1	1	1	0	1	1	0	0	1	1	0	0	1	1	0
P0A5W8	1	2	1	1	1	1	2	1	0	1	1	2	2	1	1	1	3	1	1	2	2	1	2	1	1	2	2	2	1	2	2	2	1	1	2	1	1	1	2	2	1	1	0	0	1	1	1	1	1
P0A5X0	2	4	6	2	2	1	3	3	2	2	2	6	3	2	2	1	13	2	2	2	1	1	1	1	1	1	1	1	1	1	1	1	1	1	1	1	1	1	1	1	1	1	1	1	1	1	1	1	1
P0A5X2	1	2	2	0	1	0	1	1	0	1	0	2	1	0	2	1	1	0	1	1	1	1	1	1	1	1	1	1	1	1	1	1	1	1	1	1	1	1	1	1	1	1	1	1	1	1	1	1	1
P0A5X4	1	12	1	1	2	1	1	2	1	1	1	8	1	1	2	1	4	1	1	2	1	1	1	1	1	1	1	1	1	1	1	1	1	1	1	1	1	1	1	1	1	1	1	1	1	1	1	1	1
P0A5X6	1	5	1	1	2	1	1	1	1	1	1	2	1	1	4	0	4	1	2	1	1	1	1	1	1	1	1	1	1	1	1	1	1	1	1	1	1	1	1	1	1	1	1	1	1	1	1	1	1
P0A5X8	0	0	0	0	0	0	0	0	0	0	0	0	0	0	0	0	0	0	0	0	1	0	0	0	0	1	0	0	0	0	0	0	0	0	1	1	1	0	1	0	0	0	1	1	0	0	0	1	0
P0A5Y0	0	0	0	0	0	0	0	0	0	0	0	0	0	0	0	0	0	0	0	0	3	0	7	6	1	1	3	6	8	7	6	12	1	2	3	3	4	0	2	5	1	1	2	8	1	3	2	3	0
P0A5Y2	0	0	0	0	0	0	0	0	0	1	0	0	1	2	3	0	0	0	0	0	8	1	1	1	1	1	1	1	0	1	1	1	1	1	1	2	3	0	1	1	1	1	5	6	1	1	1	1	0
P0A5Y4	36	83	59	45	42	3	82	60	32	43	25	74	61	6	8	2	61	0	0	7	26	4	28	32	25	8	37	4	10	16	16	62	6	23	9	3	5	1	22	20	2	3	19	27	3	4	35	32	0
P0A5Y6	31	82	52	53	42	1	74	46	23	41	23	63	59	8	10	2	57	0	0	6	28	4	27	32	25	9	36	4	10	16	16	60	5	24	10	3	5	2	20	20	3	4	21	27	3	3	36	32	0
P0A5Y8	2	4	1	0	1	0	6	0	0	1	8	3	2	2	2	0	3	1	0	0	2	1	3	2	4	1	2	1	1	2	3	2	1	3	1	5	2	3	3	3	1	1	1	1	2	1	1	1	1
P0A5Z0	0	0	0	0	0	0	0	0	0	0	0	0	0	0	0	0	0	0	0	0	0	0	0	0	0	1	1	0	0	0	0	0	0	0	1	0	0	0	0	0	0	0	0	0	0	0	1	1	0
P0A5Z2	1	6	3	1	2	1	2	1	1	2	1	4	1	3	3	1	4	1	1	2	1	1	1	1	1	1	1	1	1	1	1	1	1	1	1	1	1	1	1	1	1	1	1	1	1	1	1	1	1
P0A5Z4	0	7	0	0	0	0	0	0	0	0	0	1	5	3	2	0	0	0	0	1	90	2	38	14	55	18	19	4	4	39	33	37	3	25	21	44	27	3	65	77	3	3	92	89	4	35	16	22	0
P0A5Z6	0	7	0	0	0	0	0	0	0	0	1	1	6	3	2	0	0	0	0	1	92	2	39	13	57	19	16	6	5	43	33	31	3	27	19	40	27	0	59	68	3	3	86	81	2	33	19	21	0
P0A5Z8	0	14	0	0	0	1	0	0	0	0	1	0	4	1	2	0	0	0	0	1	76	2	49	14	50	9	15	4	3	35	26	40	4	27	19	37	21	3	75	90	1	1	87	83	3	8	10	14	0
P0A600	0	14	0	0	0	1	0	0	0	0	1	0	3	1	2	0	0	0	0	1	80	1	47	14	51	8	15	4	3	32	24	38	4	24	18	37	25	3	73	88	3	3	110	107	3	10	11	16	0
P0A602	0	6	0	0	0	0	0	0	0	0	0	0	0	1	2	0	0	0	0	0	31	1	3	2	3	5	3	2	2	4	5	2	1	2	4	11	8	1	7	7	2	2	10	10	3	1	2	2	1
P0A604	1	2	2	3	3	0	3	5	0	2	1	3	3	1	0	0	3	0	0	0	2	2	4	1	4	2	3	5	4	6	4	3	2	2	2	4	2	2	2	1	1	0	1	1	3	3	6	4	0
P0A606	4	8	7	4	6	0	15	15	3	6	2	11	4	5	5	0	10	0	0	3	1	1	2	0	1	1	3	5	6	3	5	2	4	3	2	2	0	0	2	3	0	0	1	2	1	2	2	3	0
P0A608	7	7	7	5	5	0	5	10	4	3	1	4	3	3	2	0	5	0	0	1	1	0	2	1	0	0	0	1	1	0	0	0	0	0	0	1	1	0	0	1	0	0	0	0	2	0	0	0	0
P0A610	1	2	1	1	1	0	1	1	1	1	0	3	2	1	1	1	1	0	0	1	3	2	2	1	1	2	1	1	1	1	1	1	1	1	1	3	3	1	1	1	1	1	3	3	1	1	3	4	10
P0A612	0	0	0	0	0	0	0	0	0	0	0	0	0	0	0	0	0	0	0	0	1	1	1	1	1	1	1	1	1	1	1	1	1	1	1	1	1	1	1	1	1	1	1	1	1	1	1	1	1
P0A614	0	1	0	0	0	0	0	0	0	0	1	0	0	2	2	0	0	0	0	0	1	0	4	3	1	1	1	1	0	3	3	5	0	0	0	0	0	0	4	2	1	1	1	1	0	1	4	3	0
P0A616	17	71	26	29	21	10	44	25	19	23	17	37	34	28	25	7	31	6	7	8	7	2	3	2	4	3	5	2	4	4	5	4	2	5	3	1	2	1	10	11	1	1	11	8	3	5	8	6	1
P0A618	7	44	8	20	13	2	9	13	9	9	13	20	12	12	8	4	14	1	1	7	17	1	7	5	11	6	7	6	6	11	10	6	7	9	10	5	4	3	13	12	4	5	19	17	6	6	12	11	1
P0A620	1	5	2	2	3	3	5	2	2	2	2	10	3	3	4	1	2	1	1	1	3	1	2	1	1	1	1	3	3	3	4	1	1	1	1	3	3	1	1	1	1	1	2	2	3	1	1	1	1
P0A622	1	7	5	3	1	1	5	1	1	2	0	6	6	2	3	1	3	0	0	7	4	0	3	3	4	3	5	3	3	4	3	4	3	2	1	3	2	1	3	3	0	0	4	4	1	2	10	9	0
P0A624	0	0	0	0	0	0	0	0	0	0	0	0	1	0	0	0	0	0	0	0	5	7	11	6	3	8	10	10	11	16	14	65	2	3	4	8	7	0	6	7	0	0	13	13	2	3	23	33	2
P0A626	0	0	0	0	0	0	0	0	0	0	0	0	0	0	0	0	0	0	0	0	7	6	8	11	6	7	5	11	5	11	8	29	2	4	6	9	12	0	5	6	2	2	11	15	3	5	7	8	3
P0A628	0	0	0	0	0	0	0	0	0	0	0	0	0	0	0	0	0	0	0	0	5	2	4	5	2	2	3	5	2	7	6	11	2	2	3	3	4	0	3	4	2	2	5	7	3	4	2	2	0
P0A630	0	0	0	0	0	0	0	0	0	0	0	0	0	0	0	0	0	0	0	0	6	4	7	8	5	3	4	9	8	8	7	27	2	2	5	6	9	0	4	5	2	3	9	11	3	5	5	7	4
P0A632	0	3	0	0	0	0	0	0	0	0	1	0	0	1	1	1	0	1	1	1	1	0	1	1	1	1	1	1	1	1	1	1	2	1	1	1	0	0	1	1	0	0	3	2	1	1	1	1	0
P0A634	6	12	9	8	7	3	11	9	7	7	7	12	6	8	8	4	13	5	5	5	6	5	4	4	4	8	4	4	4	4	4	5	4	4	4	4	6	4	4	5	4	4	4	4	5	5	6	6	4
P0A636	2	3	2	3	3	2	5	4	2	3	2	5	1	3	3	3	9	3	3	3	1	2	3	2	3	1	3	2	2	3	3	2	3	3	3	2	2	1	3	3	2	2	1	1	1	2	2	2	2
P0A638	13	61	30	22	21	3	35	23	12	22	20	49	39	35	34	5	33	5	5	9	57	1	15	11	22	4	18	7	3	11	7	18	4	15	19	14	10	3	32	24	6	5	33	32	8	4	10	21	0
P0A640	0	2	0	0	0	0	1	0	0	0	0	0	0	1	1	0	0	0	0	0	2	1	2	1	1	1	1	1	1	1	1	1	1	1	1	1	1	1	1	1	0	0	1	1	1	1	1	1	1
P0A642	22	35	46	28	39	3	75	37	13	33	8	73	34	11	15	3	51	3	3	2	17	3	9	6	15	2	7	3	3	12	12	8	1	13	14	4	5	0	10	17	0	0	13	12	3	4	2	3	0
P0A644	1	5	1	2	1	1	1	3	1	2	2	2	1	6	6	1	1	1	1	0	4	2	2	1	4	2	2	5	3	3	3	3	2	1	2	9	6	1	5	8	0	0	4	4	6	3	1	1	0
P0A646	0	0	0	0	0	0	0	0	0	0	0	0	0	1	1	0	0	0	0	0	2	0	1	0	2	3	0	1	0	1	1	0	0	1	2	1	0	0	2	3	0	0	1	1	0	1	1	1	0
P0A648	0	0	0	0	0	0	0	0	0	0	0	0	0	0	0	0	0	0	0	0	5	1	1	8	0	0	0	0	2	1	0	6	2	2	0	0	0	0	0	0	0	0	2	1	0	3	6	3	0
P0A650	2	13	0	0	0	1	0	1	1	0	1	0	4	1	1	0	0	0	0	0	4	0	5	2	1	1	0	0	0	2	3	5	0	5	0	1	0	0	1	1	0	0	7	8	0	0	0	1	0
P0A652	0	0	0	0	0	0	0	0	0	0	0	0	0	0	0	0	0	0	0	0	0	0	0	0	0	0	1	0	0	0	0	0	0	0	0	0	0	0	0	0	0	0	0	0	0	0	0	0	0
P0A654	0	0	0	0	0	0	0	0	0	0	0	0	0	0	0	0	0	0	0	0	0	0	1	1	1	0	1	1	1	1	1	1	0	1	1	1	1	0	1	0	0	0	0	0	0	0	0	0	0
P0A656	1	0	1	0	1	0	1	1	1	1	0	4	2	0	0	0	2	0	0	1	1	0	1	2	1	1	0	1	1	1	1	0	1	2	1	1	1	1	0	0	0	0	1	1	0	1	2	2	0
P0A658	4	14	2	4	2	2	8	3	1	2	2	3	4	2	2	0	2	1	1	2	2	1	2	2	0	0	1	2	2	2	2	1	0	2	1	1	2	0	1	1	0	0	3	3	2	0	2	2	0
P0A660	0	1	0	0	0	0	0	0	0	0	0	0	2	1	1	0	0	0	0	0	1	0	1	2	1	0	0	1	0	0	0	1	0	1	1	0	1	0	0	1	0	0	1	1	0	1	1	1	0
P0A662	0	1	0	0	0	0	0	0	0	0	0	0	1	1	1	0	0	0	0	0	1	0	1	1	0	0	0	1	0	0	0	1	0	1	1	0	0	0	0	1	0	0	1	1	0	1	1	1	0
P0A664	0	4	1	2	1	0	1	0	0	1	2	1	4	4	3	0	1	0	0	0	7	0	3	2	2	1	1	2	1	1	1	2	2	2	2	1	3	0	2	4	0	0	3	5	1	2	1	1	0
P0A666	0	3	0	0	0	0	0	0	0	0	0	0	1	3	2	0	0	0	0	1	1	0	0	3	0	0	2	1	2	2	2	3	0	1	1	0	0	0	0	0	0	0	0	0	0	1	6	3	0
P0A668	4	15	5	2	6	0	11	13	4	4	9	10	6	5	6	0	8	1	1	0	2	0	1	0	0	0	1	0	0	0	0	1	0	0	0	0	0	0	0	0	0	0	6	6	0	0	1	1	0
P0A670	4	15	5	2	6	0	11	13	4	4	9	10	6	5	6	0	8	1	1	1	2	0	1	0	0	0	1	0	0	0	0	1	0	0	0	0	0	0	0	0	0	0	6	6	0	0	1	1	0
P0A672	0	0	0	0	0	0	0	0	0	0	0	0	0	0	0	0	0	0	0	0	0	1	0	1	1	1	1	0	0	0	0	0	2	0	0	1	1	2	1	1	0	0	0	0	0	0	3	3	0
P0A674	2	8	3	3	9	3	3	4	3	3	3	6	6	3	5	5	6	3	6	3	2	1	1	1	1	1	1	1	1	1	1	1	1	1	1	1	1	1	1	1	1	1	2	2	1	1	1	1	1
P0A676	0	1	0	0	0	0	0	0	0	0	0	0	2	1	1	0	0	0	0	0	1	0	1	1	0	0	0	1	0	0	0	1	0	1	1	0	0	0	0	1	0	0	1	1	0	1	1	1	0
P0A678	6	43	16	7	7	0	16	8	4	9	15	17	10	9	9	0	13	0	0	6	10	1	13	13	11	8	8	3	3	13	10	12	9	10	10	14	9	1	12	12	3	2	11	13	6	6	14	16	0
P0A680	3	8	3	3	5	3	5	3	3	3	3	4	5	3	4	3	3	3	4	3	1	1	1	1	1	1	1	1	1	1	1	1	1	1	1	1	1	1	1	1	1	1	1	1	1	1	1	1	1
P0A682	0	0	0	0	0	0	0	0	0	0	0	0	0	0	0	0	0	0	0	0	0	0	0	0	0	0	0	0	0	0	0	0	0	0	0	0	0	0	0	0	0	0	0	0	0	0	0	0	0
P0A684	0	0	0	0	0	0	0	0	0	0	0	0	0	0	0	0	0	0	0	0	0	0	0	0	0	0	0	0	0	0	0	0	0	0	0	0	0	0	0	0	0	0	0	0	0	0	0	0	0
P0A686	0	0	0	0	0	0	0	0	0	0	0	0	0	0	0	0	0	0	0	0	0	0	0	0	0	0	0	0	0	0	0	0	0	0	0	0	0	0	0	0	0	0	0	0	0	0	0	0	0
P0A688	0	0	0	0	0	0	0	0	0	0	0	0	0	0	0	0	0	0	0	0	0	0	0	0	0	0	0	0	0	0	0	0	0	0	0	0	0	0	0	0	0	0	0	0	0	0	0	0	0
P0A690	0	0	0	0	0	0	0	0	0	0	0	0	0	0	0	0	0	0	0	0	0	0	0	0	0	0	0	0	0	0	0	0	0	0	0	0	0	0	0	0	0	0	0	0	0	0	0	0	0
P0A692	0	0	0	0	0	0	0	0	0	0	0	0	0	0	0	0	0	0	0	0	0	0	0	0	0	0	0	0	0	0	0	0	0	0	0	0	0	0	0	0	0	0	0	0	0	0	0	0	0
P0A694	0	0	0	0	0	0	0	0	0	0	0	0	0	0	0	0	0	0	0	0	0	0	0	0	0	0	0	0	0	0	0	0	0	0	0	0	0	0	0	0	0	0	0	0	0	0	0	0	0
P0A696	0	0	1	2	1	0	1	1	1	1	1	1	6	0	0	0	1	0	0	1	3	1	1	3	3	1	2	1	1	4	3	3	2	2	1	1	2	2	3	2	0	0	1	1	1	2	2	1	0
P0C5B9	2	6	1	3	1	0	3	2	0	2	4	3	1	2	2	0	1	0	0	1	4	2	2	2	8	3	2	3	5	1	1	9	0	1	1	0	2	0	2	5	0	0	1	4	0	1	4	4	0
P0C5C0	22	73	42	29	44	15	53	50	25	31	24	54	29	31	34	18	44	16	17	20	13	1	2	1	3	4	3	1	1	1	1	2	1	2	2	4	4	1	5	6	2	2	12	11	1	3	4	4	10
P0C5C1	0	0	0	0	0	0	0	0	0	0	0	0	0	0	0	0	0	0	0	0	2	0	3	0	2	0	0	1	0	1	1	1	1	0	1	1	1	0	0	0	0	0	2	2	0	0	0	0	0
P0C5C2	11	42	19	12	13	1	28	18	12	19	23	39	19	28	28	3	31	3	3	7	39	2	17	9	19	4	17	7	4	12	8	20	2	14	19	11	8	2	26	25	4	2	26	28	8	4	7	16	0
P0C5C3	12	38	13	12	12	1	21	15	10	14	14	24	19	25	25	3	25	3	2	6	37	2	14	9	17	4	14	6	5	10	8	16	2	10	17	10	9	2	19	21	4	2	23	23	8	3	6	16	0
P0C5C4	0	2	0	0	0	0	0	0	0	0	0	0	0	1	0	0	0	0	0	0	1	0	0	0	1	0	0	0	0	2	2	0	0	0	0	0	0	0	0	0	0	0	2	2	1	0	1	2	0
P0C5C5	1	6	2	3	5	0	3	1	1	2	0	2	3	2	2	2	3	2	2	1	1	2	2	2	1	2	2	2	2	2	2	2	2	2	2	2	1	2	1	1	1	1	1	1	1	1	2	2	1
P0C5G8	0	6	17	0	0	0	17	0	0	8	0	11	0	0	0	1	0	0	0	0	6	1	9	4	0	0	8	10	0	0	8	6	0	4	3	2	4	7	1	0	0	0	0	0	0	0	1	4	18
P0C5G9	0	0	1	0	0	0	0	0	0	0	0	0	0	0	0	1	0	0	0	0	1	0	2	2	0	0	1	0	0	0	6	1	0	2	0	1	3	0	0	0	0	0	0	0	0	0	0	0	0
P15712	0	0	0	0	0	0	0	0	0	1	0	0	1	2	3	0	0	0	0	0	7	1	1	1	1	1	1	1	0	1	1	1	1	1	1	2	3	0	1	1	1	1	5	6	1	1	1	1	0
P17670	1	7	1	2	1	1	1	1	1	1	1	1	3	1	1	2	1	2	2	1	2	1	2	1	1	0	1	1	1	2	2	3	1	1	1	1	0	1	1	1	1	1	2	2	1	1	1	1	1
P22487	0	3	0	0	0	0	0	0	0	0	1	0	2	1	1	0	0	0	0	1	2	1	2	2	2	4	2	2	2	2	2	2	2	2	2	4	4	1	2	2	2	1	2	2	2	2	3	3	0
P30234	3	1	5	2	4	2	9	2	1	4	3	12	6	0	0	1	6	0	0	1	2	1	0	1	1	2	2	1	1	3	2	1	0	1	1	0	0	0	2	1	0	0	2	2	0	0	5	6	0
P31500	0	0	0	0	0	0	0	0	0	0	0	0	0	0	0	0	0	0	0	0	0	0	0	0	0	0	0	0	0	0	0	0	0	0	0	0	0	0	0	0	0	0	0	0	0	0	0	0	0
P32724	1	6	3	1	2	1	2	1	1	2	1	2	1	2	2	1	2	1	1	1	1	1	1	1	1	1	1	1	1	1	1	1	1	1	1	1	1	1	2	2	1	1	2	2	1	1	1	1	1
P41194	2	4	2	2	1	1	4	3	2	2	2	3	2	1	3	1	3	1	1	2	1	1	1	1	1	1	1	1	1	1	1	1	1	1	1	1	1	1	1	1	1	1	1	1	2	1	1	1	1
P41196	0	5	8	2	2	0	2	2	2	2	1	5	2	1	3	2	8	2	3	2	1	1	1	1	1	1	1	1	1	1	1	1	1	1	1	1	1	1	1	1	1	1	1	1	1	1	1	1	1
P42611	0	0	0	0	0	0	0	0	0	0	0	0	0	0	0	0	0	0	0	0	0	0	0	0	0	0	0	0	0	0	0	0	0	0	0	0	0	0	0	0	0	0	0	0	0	0	0	0	0
P49993	17	59	26	22	38	12	43	33	19	23	20	42	20	26	24	18	34	16	18	18	23	5	5	5	7	5	14	4	7	6	9	7	4	5	6	10	11	3	6	7	4	4	8	8	3	5	6	8	6
P50050	0	1	0	0	0	0	0	0	0	0	0	0	1	1	1	0	0	0	0	0	1	0	1	1	0	0	0	1	0	0	0	1	0	1	1	0	0	0	0	1	0	0	1	1	0	1	1	1	0
P52214	4	33	11	10	10	1	10	4	3	8	8	16	7	3	5	2	12	0	1	3	8	8	8	7	8	6	6	3	3	8	9	10	2	9	8	6	6	2	7	11	4	4	6	5	6	4	9	13	2
P56877	0	0	0	0	0	0	0	0	0	0	0	0	0	0	0	0	0	0	0	0	0	0	0	0	0	0	0	0	0	0	0	0	0	0	0	0	0	0	0	0	0	0	0	0	0	0	0	0	0
P57689	5	8	9	7	15	1	20	8	4	8	8	19	20	4	5	3	12	1	1	8	5	1	11	10	5	6	7	4	4	5	5	9	4	8	5	13	5	1	7	7	3	3	5	5	8	6	10	7	0
P60176	8	12	8	3	7	1	18	10	4	7	4	20	6	6	3	1	13	1	1	5	4	0	6	5	4	3	4	3	3	5	5	9	6	5	2	6	0	0	3	3	1	0	5	5	4	2	8	4	0
P60230	0	40	1	0	0	0	0	0	0	0	0	0	0	0	0	1	0	0	0	0	3	0	0	0	0	0	14	0	0	0	2	0	0	0	0	1	1	0	0	1	0	0	0	0	0	0	0	1	0
P60442	2	5	4	4	5	1	5	3	2	3	2	16	4	3	3	3	5	3	3	2	1	1	1	1	1	1	1	1	1	1	1	1	1	1	1	1	1	1	1	1	1	1	1	1	1	1	1	1	1
P60479	2	10	4	2	2	0	3	2	1	2	1	7	2	3	2	2	3	1	1	3	2	1	1	1	2	2	2	1	1	1	1	1	1	1	1	2	2	1	1	1	1	0	2	2	1	1	2	2	0
P60578	0	2	0	1	0	1	1	0	0	0	2	0	4	2	2	0	0	0	0	2	3	1	2	2	2	2	2	3	3	3	2	3	2	2	2	3	1	0	2	2	1	1	3	3	2	4	2	2	0
P60627	1	3	1	1	1	0	1	1	1	1	1	1	1	2	1	1	1	2	2	0	1	1	1	1	1	1	1	1	1	1	1	1	1	1	1	1	1	1	1	1	1	1	1	1	1	1	1	1	1
P60729	2	8	5	2	2	1	4	2	2	2	2	3	3	3	2	2	6	2	2	3	1	1	1	1	1	1	1	1	1	1	1	1	1	1	1	1	1	1	1	1	1	1	1	1	1	1	1	1	1
P60759	0	2	0	0	0	0	0	0	0	0	1	0	0	1	1	0	0	0	0	1	1	0	1	1	1	1	1	1	1	1	1	1	1	1	1	1	0	0	1	1	0	0	1	1	1	1	1	1	0
P60796	0	4	0	0	0	0	0	0	0	0	1	0	1	1	1	1	0	0	0	3	1	0	1	1	2	2	2	2	0	1	1	1	1	1	1	1	0	0	1	1	1	1	1	1	1	1	3	3	0
P61181	1	7	9	0	3	0	2	1	1	2	0	17	2	2	1	0	7	0	0	0	1	1	1	1	1	1	1	1	1	1	1	1	1	1	1	1	1	1	1	1	1	1	1	1	1	1	1	1	1
P62190	2	2	3	2	3	1	3	5	0	3	2	12	2	2	2	3	6	2	2	2	1	1	1	1	1	1	1	1	1	1	1	1	1	1	1	1	1	1	1	1	1	1	1	1	1	1	1	1	1
P62403	1	5	1	2	2	1	1	1	0	1	1	7	1	1	2	1	4	1	1	3	1	1	1	1	1	1	1	1	1	1	1	1	1	1	1	1	1	1	1	1	1	1	1	1	1	1	1	1	1
P63288	2	16	2	0	0	1	5	3	2	1	5	2	4	4	4	3	3	2	4	3	3	1	3	4	3	2	3	1	1	3	3	3	2	3	2	2	2	3	3	5	3	3	6	7	3	2	3	3	0
P63338	2	5	5	2	4	0	6	2	2	4	2	13	3	2	2	0	5	1	1	4	1	1	0	0	2	1	1	2	1	1	1	1	1	0	0	2	1	0	1	1	0	0	2	2	0	0	2	4	0
P63345	25	95	47	32	50	14	61	58	28	35	29	54	33	33	36	20	50	20	20	22	15	1	3	2	4	5	4	2	2	2	2	3	2	4	4	4	5	3	8	8	2	2	13	14	3	5	5	6	11
P63349	12	17	37	16	18	0	37	17	8	16	1	30	18	1	1	0	28	0	0	3	2	0	2	17	16	1	2	0	0	3	4	2	1	0	0	1	2	0	0	2	0	0	1	1	0	0	24	18	0
P63357	0	2	0	0	0	0	0	0	0	0	0	0	3	1	1	0	0	0	0	0	22	15	26	18	15	12	18	17	17	28	24	111	14	8	16	50	33	5	12	12	3	3	29	31	7	8	33	30	5
P63380	1	9	3	1	1	0	4	7	3	1	3	5	3	0	0	0	6	0	0	1	25	12	35	13	20	18	26	16	15	28	24	93	15	5	21	35	21	5	18	20	2	2	31	29	8	6	34	32	6
P63391	20	46	71	38	29	5	40	50	14	23	17	49	49	6	8	5	65	3	3	10	25	20	20	13	9	11	18	18	16	31	29	92	8	4	17	29	29	10	9	14	4	4	38	34	4	9	28	33	6
P63393	20	45	69	38	29	5	40	50	14	23	16	47	50	7	8	5	65	3	3	10	29	18	19	14	10	10	19	20	16	31	27	92	11	5	17	24	23	10	9	12	4	2	38	35	4	8	32	36	6
P63395	0	0	2	1	3	0	1	0	1	2	0	4	2	0	0	0	6	0	0	1	17	15	27	18	13	11	20	19	16	30	27	122	13	7	16	49	32	3	13	14	2	3	28	29	6	6	32	31	6
P63397	20	46	76	38	29	5	41	50	14	23	16	50	51	7	8	5	65	3	3	10	26	19	21	14	10	8	19	18	17	27	25	84	10	5	16	35	28	11	8	13	4	4	41	34	6	11	29	35	6
P63399	0	1	0	1	0	0	0	1	0	0	0	0	2	1	2	0	0	0	0	0	16	5	32	13	12	14	26	18	17	31	29	133	13	6	13	43	26	2	11	15	1	1	26	24	2	1	40	40	3
P63401	1	1	0	0	0	0	1	0	0	1	0	0	4	0	1	0	0	0	0	0	19	15	27	17	15	12	22	17	16	31	25	107	11	9	15	47	29	5	15	16	3	2	29	26	6	9	35	32	8
P63405	0	3	1	3	1	0	3	0	0	2	1	4	4	0	0	0	3	0	0	0	2	2	5	5	4	2	3	2	2	3	3	4	1	4	3	2	3	2	5	4	1	1	2	2	2	2	2	2	0
P63407	2	6	4	5	9	1	6	4	2	4	3	8	7	2	2	1	7	0	0	2	2	2	5	5	6	2	3	2	2	3	3	4	1	4	3	2	3	2	6	6	1	1	2	2	2	2	2	3	0
P63409	0	0	0	0	0	0	0	0	0	0	0	0	0	0	0	0	0	0	0	0	1	1	0	1	0	1	1	1	1	2	2	0	0	0	1	4	3	0	4	4	0	0	1	1	0	3	0	1	1
P63425	8	27	17	12	11	5	23	16	11	15	6	38	23	17	18	4	31	4	5	7	45	5	18	17	17	7	12	5	3	34	25	29	6	7	8	23	23	0	10	10	1	1	23	20	3	4	24	21	0
P63427	12	10	23	30	17	0	29	17	13	15	11	36	19	5	5	0	20	0	0	1	4	1	21	26	5	4	12	0	0	5	4	14	0	22	3	1	3	0	8	10	0	0	2	2	0	0	9	9	0
P63429	12	10	23	29	18	0	31	19	13	15	11	34	20	5	5	0	20	0	0	1	4	1	21	26	5	4	12	0	0	5	4	14	0	22	3	1	3	0	8	10	0	0	2	2	0	0	8	9	0
P63431	12	9	21	27	16	0	27	14	9	13	11	29	19	5	5	0	17	0	0	1	3	1	21	24	5	4	12	0	0	5	4	12	0	22	3	1	3	0	8	9	0	0	2	2	0	0	8	8	0
P63452	0	0	0	0	0	0	0	0	0	0	0	0	0	0	0	0	0	0	0	0	0	1	0	0	0	1	0	0	0	0	0	0	0	0	0	0	0	0	0	0	0	0	0	0	1	0	0	0	0
P63454	4	5	4	4	6	3	8	6	2	2	3	3	8	7	12	1	3	0	0	2	4	1	5	4	4	2	1	1	1	4	4	7	2	3	3	1	1	1	3	2	1	1	12	13	1	1	2	2	0
P63456	4	5	5	4	6	3	8	6	2	2	3	5	8	7	12	1	4	0	0	2	4	1	4	4	3	2	1	1	1	4	4	7	2	3	3	1	1	1	3	2	1	1	12	13	1	1	2	2	0
P63458	3	2	5	3	5	2	8	4	3	2	2	3	5	2	2	1	2	0	0	2	3	1	2	2	2	1	1	1	1	1	1	3	1	1	1	1	1	1	2	1	1	1	11	12	1	1	2	1	0
P63460	10	21	12	4	12	1	13	12	4	9	3	10	7	7	9	0	10	0	0	1	11	1	10	7	5	2	2	0	1	5	2	9	0	9	4	0	0	0	7	4	1	1	9	16	1	0	11	9	0
P63484	11	31	41	15	17	0	26	18	10	17	8	35	12	10	10	2	35	2	2	16	8	4	5	3	13	8	7	1	8	3	3	19	8	3	1	3	1	0	12	11	0	0	7	12	1	1	17	20	0
P63490	5	9	6	10	6	0	4	10	6	3	2	3	10	3	5	1	5	1	1	3	2	0	6	4	6	2	8	0	0	1	1	4	1	5	3	1	0	1	4	3	1	1	4	3	1	1	6	4	0
P63492	5	9	6	10	6	0	4	10	6	3	2	3	10	3	5	1	5	1	1	3	2	0	6	4	6	2	8	0	0	1	1	4	1	5	2	1	0	1	4	3	1	1	4	3	1	1	6	4	0
P63494	5	9	6	9	6	0	4	10	6	3	1	3	9	3	5	1	5	1	1	3	2	0	6	4	6	2	8	0	0	1	1	4	1	5	2	1	0	1	4	3	1	1	4	3	1	1	6	4	0
P63496	5	9	6	10	6	0	4	10	6	3	2	3	10	3	5	1	5	1	1	3	2	0	6	4	6	2	8	0	0	1	1	4	1	5	3	1	0	1	4	3	1	1	4	3	1	1	6	4	0
P63498	5	39	16	11	8	0	21	10	4	8	11	15	14	10	9	0	14	1	1	7	12	2	16	15	19	8	10	7	8	14	11	14	12	11	9	20	13	1	13	13	2	1	15	17	7	9	15	15	1
P63500	3	40	12	4	5	0	12	2	2	6	10	12	6	8	8	0	10	0	0	3	8	0	12	8	11	6	7	3	3	9	6	11	9	9	9	12	8	1	10	10	1	1	12	12	5	5	12	15	0
P63502	5	38	15	7	7	0	15	7	3	8	9	15	13	9	8	0	13	0	0	6	10	1	13	12	14	7	9	3	4	11	8	13	8	8	8	13	13	1	12	11	2	1	13	14	6	8	13	15	0
P63504	5	9	6	7	11	0	6	7	2	5	3	11	5	4	4	1	9	0	0	4	4	0	8	8	9	7	6	4	3	7	6	12	3	5	5	6	2	0	3	3	2	2	5	7	3	4	8	5	0
P63506	5	9	6	7	11	0	6	8	2	5	5	9	5	4	4	1	8	0	0	4	4	0	8	8	9	7	6	4	3	7	6	12	3	5	5	6	2	0	4	4	2	2	5	7	3	4	8	5	0
P63509	5	9	6	7	11	0	6	8	3	5	4	13	5	4	4	1	9	0	0	4	4	0	8	8	9	7	6	4	3	7	6	12	3	5	5	6	2	0	4	4	2	2	5	7	4	4	9	5	0
P63514	3	5	2	2	2	0	4	4	2	2	1	5	3	3	3	1	3	1	1	2	6	0	2	3	3	2	4	3	3	5	3	4	1	4	3	5	1	0	5	6	0	0	6	5	3	1	3	2	1
P63516	5	9	8	9	6	2	10	6	6	7	14	19	18	6	5	2	14	2	2	4	8	1	8	7	11	5	5	2	2	6	4	4	2	4	3	11	7	2	7	10	2	2	9	11	5	3	9	8	1
P63519	2	8	2	6	2	0	12	2	2	2	5	4	14	4	3	0	5	0	0	3	5	0	0	2	3	1	2	0	0	1	2	1	0	3	1	1	0	0	2	2	0	0	3	3	1	1	2	3	0
P63523	23	56	37	34	30	4	52	45	19	30	13	80	48	12	15	6	48	4	4	10	15	0	18	14	9	5	13	3	2	14	16	12	2	12	12	0	0	1	15	15	0	0	15	23	3	3	17	20	0
P63527	20	0	24	41	17	4	45	44	17	19	20	35	25	1	1	3	33	2	2	0	6	1	1	1	4	0	1	0	0	0	0	3	0	2	0	0	0	0	0	1	0	0	6	5	0	1	1	1	0
P63531	13	11	5	5	4	2	9	17	7	3	4	6	4	8	7	0	7	0	0	8	6	8	6	0	11	6	4	2	4	8	7	6	3	0	1	2	0	0	9	7	0	0	8	6	1	0	11	17	0
P63533	10	21	13	7	16	0	11	9	8	8	4	33	15	9	8	1	22	1	1	1	3	0	4	2	5	3	4	0	0	2	2	3	0	1	1	1	0	0	0	1	0	0	5	3	1	1	3	6	0
P63535	0	0	0	1	0	1	1	0	0	0	0	0	1	0	0	1	0	1	1	1	0	1	0	0	2	2	0	1	0	1	1	1	1	0	1	0	1	0	1	1	0	0	0	0	1	1	1	2	1
P63540	2	13	6	1	5	1	3	1	0	4	2	5	5	6	6	2	6	2	2	3	2	2	2	2	2	2	2	2	3	2	3	2	2	2	3	3	3	2	2	2	1	1	1	1	3	2	2	2	0
P63551	0	0	0	0	0	0	0	0	0	0	0	0	0	0	0	0	0	0	0	0	0	0	0	0	0	0	0	0	0	1	1	0	0	0	0	3	0	0	0	0	0	0	0	0	0	0	0	0	0
P63562	0	3	0	0	0	0	0	0	0	0	1	0	1	2	2	0	0	0	0	2	2	1	1	1	3	2	2	1	1	2	2	2	2	2	2	2	1	1	4	4	1	1	3	3	2	2	1	1	0
P63568	5	9	6	7	11	0	6	7	2	5	3	10	5	4	4	1	8	0	0	4	4	0	8	8	9	7	6	4	3	7	6	12	3	5	5	6	2	0	3	3	2	2	5	7	3	4	8	5	0
P63571	0	2	0	0	0	0	0	0	0	0	0	0	0	1	1	0	0	0	0	1	1	0	1	1	0	1	1	0	0	0	0	1	1	1	1	1	0	0	2	2	0	0	2	2	1	1	1	1	0
P63577	1	6	2	3	2	0	3	2	1	2	1	4	5	3	2	0	3	1	1	1	3	1	2	1	3	1	1	2	1	1	1	2	2	1	3	1	2	0	2	4	0	0	2	3	1	2	1	1	0
P63611	0	3	0	0	0	0	0	0	0	0	1	0	1	1	1	1	0	0	0	1	1	1	1	1	1	1	1	1	1	1	1	1	1	1	1	1	1	0	1	1	0	0	1	1	1	1	1	1	0
P63627	1	0	1	4	1	0	1	2	2	1	1	1	3	1	1	0	1	0	0	2	0	0	2	2	0	0	0	2	1	2	2	1	0	0	0	1	1	0	1	1	0	0	0	0	0	1	0	0	0
P63629	0	5	0	0	0	0	0	0	0	0	1	0	1	2	2	0	0	0	0	1	1	0	2	2	2	2	3	1	1	2	2	3	1	1	1	2	2	0	3	3	0	0	2	2	1	1	2	3	0
P63635	0	1	0	0	0	0	0	0	0	0	0	0	0	0	0	0	0	0	0	0	1	0	3	4	2	1	0	2	2	2	2	5	0	1	0	2	2	1	2	1	0	0	1	1	1	1	1	1	0
P63642	1	2	1	0	3	0	3	1	1	1	1	2	1	1	1	0	1	0	0	1	1	0	1	1	1	1	1	1	1	1	1	1	2	1	1	2	0	0	1	2	0	0	1	1	1	1	1	1	0
P63648	1	0	4	1	4	0	2	3	1	2	1	6	2	0	0	0	2	0	0	0	0	0	2	6	1	1	2	0	0	0	0	1	0	0	0	2	3	0	1	1	0	0	0	0	0	0	3	4	0
P63650	2	0	4	3	2	0	3	4	2	2	2	5	3	0	0	0	2	0	0	0	0	1	2	5	2	1	3	0	1	0	0	2	1	0	0	2	4	0	3	3	0	0	0	0	0	0	3	4	0
P63652	1	0	4	1	2	0	3	3	1	2	1	5	1	0	0	0	2	0	0	0	0	0	2	4	1	1	2	0	0	0	0	1	0	0	0	2	3	0	1	1	0	0	0	0	0	0	3	4	0
P63654	1	4	1	1	1	0	1	1	0	1	0	1	0	0	2	0	2	0	0	1	2	1	1	1	1	1	1	1	1	1	1	1	1	1	1	1	1	1	1	1	1	1	1	1	1	1	1	1	0
P63656	0	2	0	5	1	0	8	8	0	3	4	1	1	1	1	0	8	0	0	0	3	1	1	2	2	1	2	1	1	1	2	2	1	1	1	2	2	1	1	1	0	0	2	2	3	1	1	1	0
P63662	1	3	1	1	0	0	1	1	0	1	1	2	1	1	2	1	2	1	1	1	2	0	2	1	1	1	1	1	1	1	1	1	1	1	1	1	1	1	1	1	1	1	1	1	1	1	0	1	0
[truncated: 5,898 more rows]
[truncated: 206 more columns]
