# Supplementary material for: Proteins with Complex Architecture as Potential Targets for Drug Design: A Case Study of Mycobacterium tuberculosis
Source: PLoS Comput Biol. 2011 Jul 21;7(7):e1002118. doi: 10.1371/journal.pcbi.1002118 (PMC3140968; doi:10.1371/journal.pcbi.1002118)
Supplement: Table S4 — pkn proteins. List of proteins belonging to the pkn protein family. Proteins are defined with Uniprot IDs. For each protein, the pknX name is given. (XLS) [file pcbi.1002118.s005.xls]

## Sheet: pkn_names
	Uniprot ID	Name
	P65726	pknA
	P0A5S4	pknB
	O05871	pknD
	P72001	pknE
	P72003	pknF
	P65728	pknG
	Q11053	pknH
	P65730	pknI
	P65732	pknJ
	P95078	pknK
	O53510	pknL
