# Supplementary material for: Proteins with Complex Architecture as Potential Targets for Drug Design: A Case Study of Mycobacterium tuberculosis
Source: PLoS Comput Biol. 2011 Jul 21;7(7):e1002118. doi: 10.1371/journal.pcbi.1002118 (PMC3140968; doi:10.1371/journal.pcbi.1002118)
Supplement: Table S5 — PE/PPE family proteins. List of proteins belonging to the PE/PPE protein family. Proteins are defined with Uniprot IDs. For each protein, the pknX name is given. (XLS) [file pcbi.1002118.s006.xls]

## Sheet: PE-PPE_total_list
	Uniprot ID	Subcategory
	O86338	PE
	P0A682	PE
	P0A684	PE
	Q6MX17	PE
	Q6MX19	PE
	Q79F93	PE
	Q79FA1	PE
	Q79FA8	PE
	Q79FD3	PE
	Q79FE3	PE
	Q79FH7	PE
	Q79FK4	PE
	Q79FR3	PE
	Q79FR5	PE
	Q79FS7	PE
	Q79FS8	PE
	Q79G04	PE
	Q79G05	PE
	Q79G06	PE
	Q7D4N3	PE
	Q7D550	PE
	Q7D568	PE
	Q7D5G7	PE
	Q7D756	PE
	Q7D7I5	PE
	Q7D7X6	PE
	Q7D7Y9	PE
	Q7D879	PE
	Q7D8G5	PE
	Q7D8L5	PE
	Q7D8P8	PE
	Q7D8Y6	PE
	Q7D937	PE
	Q7DA36	PE
	Q7DAC9	PE
	O53416	PE-PGRS
	O53553	PE-PGRS
	O53810	PE-PGRS
	P0A686	PE-PGRS
	P0A688	PE-PGRS
	P0A690	PE-PGRS
	P56877	PE-PGRS
	P71664	PE-PGRS
	P77909	PE-PGRS
	Q10637	PE-PGRS
	Q10873	PE-PGRS
	Q50594	PE-PGRS
	Q50615	PE-PGRS
	Q50630	PE-PGRS
	Q6MWV0	PE-PGRS
	Q6MWV1	PE-PGRS
	Q6MWV6	PE-PGRS
	Q6MWW6	PE-PGRS
	Q6MWW7	PE-PGRS
	Q6MWW8	PE-PGRS
	Q6MWW9	PE-PGRS
	Q6MWX5	PE-PGRS
	Q6MWX7	PE-PGRS
	Q6MWY0	PE-PGRS
	Q6MWY1	PE-PGRS
	Q6MX26	PE-PGRS
	Q6MX28	PE-PGRS
	Q6MX30	PE-PGRS
	Q6MX50	PE-PGRS
	Q79FB3	PE-PGRS
	Q79FC3	PE-PGRS
	Q79FD4	PE-PGRS
	Q79FE6	PE-PGRS
	Q79FE9	PE-PGRS
	Q79FH2	PE-PGRS
	Q79FJ9	PE-PGRS
	Q79FK9	PE-PGRS
	Q79FL8	PE-PGRS
	Q79FP0	PE-PGRS
	Q79FP1	PE-PGRS
	Q79FP2	PE-PGRS
	Q79FP3	PE-PGRS
	Q79FQ7	PE-PGRS
	Q79FS5	PE-PGRS
	Q79FT0	PE-PGRS
	Q79FT3	PE-PGRS
	Q79FU0	PE-PGRS
	Q79FU2	PE-PGRS
	Q79FU3	PE-PGRS
	Q79FV3	PE-PGRS
	Q79FV6	PE-PGRS
	Q79FV7	PE-PGRS
	Q79FV8	PE-PGRS
	Q79FW5	PE-PGRS
	Q79FW8	PE-PGRS
	Q79FW9	PE-PGRS
	Q79FY9	PE-PGRS
	Q79G08	PE-PGRS
	Q79G09	PE-PGRS
	Q7D4U2	PE-PGRS
	Q7D580	PE-PGRS
	Q7D724	PE-PGRS
	Q7D7A7	PE-PGRS
	Q7D7F8	PE-PGRS
	O06246	PPE
	O53268	PPE
	P0A692	PPE
	P0A694	PPE
	P31500	PPE
	P42611	PPE
	P95315	PPE
	Q10540	PPE
	Q10778	PPE
	Q10892	PPE
	Q11031	PPE
	Q50702	PPE
	Q50703	PPE
	Q6MWW0	PPE
	Q6MWW4	PPE
	Q6MWX1	PPE
	Q6MWX8	PPE
	Q6MWX9	PPE
	Q6MWY2	PPE
	Q6MX04	PPE
	Q6MX05	PPE
	Q6MX07	PPE
	Q6MX41	PPE
	Q6MX42	PPE
	Q6MX44	PPE
	Q6MX45	PPE
	Q6MX48	PPE
	Q6MX49	PPE
	Q79F90	PPE
	Q79F92	PPE
	Q79FA2	PPE
	Q79FA3	PPE
	Q79FA7	PPE
	Q79FA9	PPE
	Q79FC6	PPE
	Q79FE1	PPE
	Q79FF3	PPE
	Q79FH3	PPE
	Q79FI8	PPE
	Q79FI9	PPE
	Q79FJ5	PPE
	Q79FJ6	PPE
	Q79FJ7	PPE
	Q79FK2	PPE
	Q79FK5	PPE
	Q79FK6	PPE
	Q79FK8	PPE
	Q79FL2	PPE
	Q79FL6	PPE
	Q79FS0	PPE
	Q79FV1	PPE
	Q79FW4	PPE
	Q79FY8	PPE
	Q79FZ4	PPE
	Q7D569	PPE
	Q7D5B9	PPE
	Q7D5C5	PPE
	Q7D623	PPE
	Q7D631	PPE
	Q7D7A1	PPE
	Q7D7A2	PPE
	Q7D7X9	PPE
	Q7D842	PPE
	Q7D8H6	PPE
	Q7D8M9	PPE
	Q7D8Q2	PPE
	Q7D8Y7	PPE
	Q7DA35	PPE
